# Supplementary material for: The Petrology & Geochemistry of REE-Enriched, Alkaline Vol-Canic Rocks of Ambitle Island, Feni Island Group, Papua New Guinea
Source: Preprints.org preprint supplement (doi:10.20944/preprints202306.0971.v1), 2023-06-14
Supplement: Supplementary file 2 [file 09L016 AR-MS_Precious & Base Metal Analyses.xls]

## Sheet: RESULTS FORM
						CERTIFICATE OF ANALYSIS
CLIENT:	MSSP-GEOMAP												SAMPLES RECEIVED:					2009-12-14
													ANALYSIS INSTRUCTIONS RECEIVED:					2009-12-14
ADDRESS:	PO Box 594,												DATE OF REPORT:					2010-01-05
	Konedobu, N.C.D.												STATUS OF REPORT:					FINAL
	Papua New Guinea												ANALYSIS COMPLETE:					2010-01-05
													PREPARATION CODE:					P6
INVOICE:	Same												ANALYSIS CODE:					AR/MS
P.O. NO.:	None
ATTN:	Dr. Friedrich-Karl Bandelow
CLIENT REF.:	Samples GGS1 - F36
LAB. BATCH NO.:	09L016
NO. SAMPLES:	60
SAMPLE TYPE:	Rock
																	Approved Signatories
																[ ]	Pedro Alvarez, General Manager
																[ ]	Andrey Tairov, Technical Manager
																[ ]	Svetlana Tairova, Senior Spectroscopist
																[ ]	Pat Gilchreest, Senior Chemist
LAB NO.	SAMPLE NO.	Ag	As	Be	Bi	Cd	Co	Cu	Ge	Hg	Mo	Ni	Pb	Sb	Se	Te	Tl	Zn
		ppm	ppm	ppm	ppm	ppm	ppm	ppm	ppm	ppm	ppm	ppm	ppm	ppm	ppm	ppm	ppm	ppm
1	GG1	0.18	0.73	0.14	0.046	0.06	2.925	29.0562	<0.1	0.038976	0.14	1.36302	3.01948	0.11	<0.2	0.02	0.088	41.8656
2	GG2	0.15	0.61	<0.1	0.022	0.04	3.211	34.8099	<0.1	0.0375487	0.11	1.34366	2.21856	0.13	<0.2	0.02	0.044	34.3674
3	GG4	0.15	0.22	<0.1	0.022	0.06	6.279	23.9847	<0.1	0.0401086	0.09	9.32	2.69167	0.16	0.3	0.05	0.044	41.4622
4	GG5	0.08	0.71	0.12	0.034	0.04	6.318	47.043	<0.1	0.0320978	0.24	5.04	1.94153	0.15	<0.2	0.02	0.022	44.2451
5	GG6	0.05	0.73	0.11	<0.02	0.05	7.878	53.3353	<0.1	0.028707	0.18	3.26	2.35193	0.15	<0.2	0.07	0.044	49.6433
6	GG7	0.12	0.31	<0.1	<0.02	0.04	7.93	43.1856	<0.1	0.0236943	0.28	2.86	1.47628	0.13	<0.2	0.05	0.044	51.1934
7	GG8	0.04	0.36	0.11	<0.02	0.06	15.054	101.581	<0.1	0.0321307	0.05	17.63	0.864818	0.16	<0.2	0.1	0.022	43.004
8	GG9	0.04	0.64	0.13	0.046	0.04	3.77	30.9301	<0.1	0.0244398	0.05	2.6	2.50477	0.15	<0.2	0.03	0.044	36.5032
9	GG12	0.03	0.7	<0.1	<0.02	0.03	4.966	26.8109	<0.1	0.0219289	0.09	1.59	1.62567	0.15	<0.2	0.06	0.022	41.2926
10	GG13	0.05	0.74	<0.1	<0.02	0.08	11.258	32.7207	<0.1	0.0209398	0.64	7.2	4.56	0.14	<0.2	0.05	0.044	47.8971
Rep 10		0.04	0.76	0.11	<0.02	0.06	11.895	33.1791	<0.1	0.0252889	0.66	7.76	5.13803	0.13	<0.2	0.04	0.044	53.1971
11	GG14	0.04	0.92	0.14	<0.02	0.11	8.983	58.4478	0.11	0.019838	0.32	4.86	1.19747	0.13	<0.2	0.03	0.044	56.9526
12	GG15	0.04	0.25	<0.1	<0.02	0.03	2.171	17.2745	<0.1	0.023338	0.07	2.3	0.751026	0.11	0.23	0.03	0.022	18.1725
13	GG16	0.03	3.44	<0.1	<0.02	0.04	9.035	41.061	<0.1	0.019418	0.12	10.52	1.23985	0.12	0.21	<0.02	0.022	39.5064
14	GG18	0.04	0.54	0.12	<0.02	0.05	5.668	33.4516	<0.1	0.0206325	0.21	2.76	2.53804	0.11	0.28	0.04	0.022	47.6263
15	GG19	0.05	0.73	0.19	<0.02	0.06	9.36	62.557	0.14	0.016618	0.19	6.81	9.20546	0.12	<0.2	<0.02	0.022	46.2687
16	GG21	0.07	1.41	0.94	<0.02	0.07	29.614	208.087	<0.1	0.0203889	0.67	14.35	4.37903	0.14	0.38	0.12	0.132	76.6747
17	GG22	0.07	0.69	0.95	<0.02	0.04	26.884	209.15	<0.1	0.021238	0.69	12.66	4.66643	0.1	0.3	0.1	0.132	75.3613
18	GG23	0.03	0.51	<0.1	<0.02	0.09	13.299	53.8775	<0.1	0.015918	0.8	7.36	4.50981	0.08	0.29	0.03	0.066	64.3714
19	GG24	0.04	0.38	0.13	0.022	0.08	4.524	21.9477	<0.1	0.0202489	0.07	3.74	3.57285	0.07	<0.2	0.05	0.022	25.6642
20	GG25	0.03	0.29	0.18	<0.02	0.03	8.84	19.8227	<0.1	0.015638	0.05	5.84	1.62824	0.05	<0.2	0.03	0.022	25.7653
Rep 20		0.03	0.3	0.15	<0.02	0.03	8.593	19.7233	<0.1	0.0114471	0.05	5.83	1.0364	0.06	<0.2	0.04	0.022	26.2843
21	GG26	0.03	0.47	0.14	<0.02	0.04	7.176	8.78038	<0.1	0.0125671	0.1	4.4	1.00791	0.05	<0.2	0.05	0.022	29.9282
22	GG27	0.03	0.52	0.11	<0.02	0.05	7.709	15.9819	<0.1	0.012838	0.15	4.4	0.380984	<0.05	<0.2	0.05	0.022	52.5057
23	GG28	0.02	0.71	<0.1	<0.02	0.02	7.124	42.0648	<0.1	0.0164962	0.08	3.55	2.91291	<0.05	<0.2	0.05	0.022	33.3805
24	GG29	0.03	0.38	0.1	<0.02	0.04	15.769	57.5666	<0.1	0.0108871	0.34	14.15	2.83918	<0.05	<0.2	0.06	0.022	57.5468
25	GG30	0.03	0.88	0.11	<0.02	0.06	10.231	38.3849	<0.1	0.0140707	0.72	3.69	2.83138	0.06	0.24	0.09	0.022	75.2254
26	GG31	0.03	0.47	0.13	<0.02	0.05	11.466	43.197	<0.1	0.0087871	0.22	6.07	1.47383	0.05	<0.2	0.05	0.022	50.3211
27	GG33	0.03	0.52	0.16	<0.02	0.06	21.06	41.2933	<0.1	0.016058	0.08	9.67	1.61266	0.05	0.58	0.12	0.022	51.1969
28	GG34	0.02	0.86	<0.1	<0.02	0.03	4.498	4.04486	<0.1	0.0194271	<0.05	3.63	0.426641	0.06	0.2	0.11	0.022	9.82748
29	GG35-A	0.05	0.55	0.13	<0.02	0.03	6.188	38.682	<0.1	0.0198471	0.15	3.23	2.01971	0.06	0.3	0.07	0.022	41.9242
30	F1	0.1	608.297	1.2	0.094	0.1	10.192	202.19	0.28	0.0906262	47.3598	11.0795	5.63285	26.71	0.72	0.05	9.724	107.592
Rep 30		0.09	603.346	1.1	0.106	0.1	9.763	198.909	0.32	0.103263	46.6489	11.4222	6.30519	26.61	1.25	0.04	9.13	100.606
31	F2	0.06	4.91389	1.52	0.034	0.16	17.628	89.7118	0.2	0.212153	0.45	9.26	8.52292	0.2	<0.2	0.06	0.814	148.156
32	F3	0.04	1.25	0.57	<0.02	0.08	4.68	5.96414	0.11	0.0230671	0.13	7.83	4.09839	0.21	0.29	0.02	0.22	43.882
33	F4	0.07	5.32	0.78	0.034	0.14	16.562	95.625	<0.1	0.0167979	1.08	18.55	6.3	0.84	0.53	0.08	0.176	65.5382
34	F5	0.11	2.89	1.2	0.058	0.12	20.592	169.722	<0.1	<0.005	1.64	15.14	4.42121	0.1	<0.2	0.1	0.132	105.931
35	F6	0.14	2.57	1.12	0.034	0.13	17.719	214.378	<0.1	0.009198	0.52	7.56	7.4	0.06	0.36	0.16	0.066	101.416
36	F7	0.09	1.69	0.94	0.034	0.13	19.747	150.686	<0.1	0.0091707	0.8	10.72	5.20441	0.05	0.29	0.12	0.088	86.1305
37	F8	0.1	6.16	1.24	0.058	0.24	23.53	136.503	0.11	<0.005	1.42	21.86	11.58	0.08	0.42	0.15	0.176	101.636
38	F9	0.14	2.78	1.08	0.034	0.13	12.857	219.506	<0.1	0.0115689	0.08	3.77	7.17207	0.06	0.62	0.12	0.088	92.7651
39	F10	0.15	4.51	1.56	<0.02	0.1	19.981	214.565	0.1	<0.005	1.36	8.93	9.76075	0.1	0.4	0.08	0.22	102.462
40	F11	0.08	1.72	1.03	<0.02	0.09	19.76	125.632	<0.1	0.0116634	0.84	20.72	5.52942	<0.05	0.45	0.14	0.154	77.0483
Rep 40		0.07	2.02	1.02	<0.02	0.1	20.371	124.838	<0.1	0.0073325	0.89	20.94	6.38369	<0.05	0.46	0.14	0.132	74.0993
41	F12	0.12	55.0676	<0.1	0.298	0.05	3.9	5.0273	0.1	0.0106001	0.76	10.82	23.8706	0.8	0.56	1	0.132	29.8524
42	F14	0.03	0.26	0.15	0.022	0.03	3.523	7.10228	<0.1	0.0556598	0.16	7.27	2.61432	0.06	<0.2	0.02	0.066	33.9888
43	F15	0.1	1.88	1.05	<0.02	0.09	28.236	148.967	<0.1	0.0075761	0.56	132.099	4.29696	<0.05	<0.2	0.08	0.066	82.2455
44	F16	0.1	1.5	1.08	0.046	0.11	19.812	156.569	<0.1	<0.005	0.61	14.7	9.14309	<0.05	0.69	0.32	0.132	84.8895
45	F17	0.09	7.22	1.11	0.046	0.13	20.423	134.935	0.14	0.0187397	2	18.5	10.6745	0.13	0.4	0.07	0.11	109.706
46	F18	0.17	39.69	0.22	<0.02	0.15	1.014	8.04706	0.51	0.24833	4.68	1.34	5.01357	10.84	3.58	0.02	24.2	19.1789
47	F19	0.09	1.61	0.91	0.034	0.1	19.825	103.789	<0.1	0.0140343	0.93	15.83	5.96768	0.05	0.54	0.11	2.266	72.9455
48	F22	0.1	1.76	1.48	0.022	0.11	15.548	104.896	<0.1	0.0152124	1.63	5.09	6.30206	0.09	0.82	0.09	1.034	111.974
49	F23	0.09	1.98	1.56	0.034	0.14	15.093	102.213	<0.1	0.0185997	0.84	5.61	6.85865	0.05	0.2	0.1	0.55	109.991
50	F24	0.08	1.69	1.54	0.022	0.14	13.689	91.5475	<0.1	0.0149597	1.35	4.61	6.44687	<0.05	0.26	0.13	0.33	110.901
Rep 50		0.08	1.55	1.53	0.022	0.14	14.001	90.2647	<0.1	0.0101906	1.31	4.56	6.19123	<0.05	0.38	0.11	0.242	104.43
51	F25	1.52	1909.9	<0.1	0.334	0.48	61.256	755.171	<0.1	1.4287	818.921	47.27	44.2744	134.87	43.97	1.23	56.32	30.2295
52	F26	0.18	42.3636	0.26	<0.02	0.08	1.391	11.1985	0.68	0.276634	9.74	1.49	6.17553	9.78	2.34	0.03	20.614	20.8567
53	F27	0.15	2.88835	0.12	<0.02	0.04	0.169	1.64044	<0.1	0.0216251	1.43	0.36	2.24709	1.29	0.27	<0.02	3.476	14.0654
54	F29	0.14	173.091	1.15	0.034	0.13	20.943	196.627	1.06	0.0529935	88.5876	14.12	4.74611	7.51	<0.2	0.11	2.904	99.1852
55	F30	0.05	1439.94	<0.1	0.202	0.05	16.432	105.442	2.86	0.0138411	48.8164	18.99	41.4015	25.275	<0.2	0.55	4.796	9.14546
56	F31	3.18	696.528	1.39	<0.02	0.16	6.552	30.449	1.6	0.162798	279.128	2.73	4.12462	62.9118	7.86	0.07	61.116	13.5325
57	F33	0.238672	3.79033	<0.1	<0.02	0.0390719	<0.1	1.0378	<0.1	0.046578	1.01914	0.24138	13.3161	0.218422	<0.2	0.0639548	0.5	12.8264
58	F34	0.11	6.57	0.26	<0.02	0.05	0.13	1.5496	<0.1	0.0510377	1.22	0.49	3.21641	3.36	0.33	<0.02	3.278	17.0464
59	F35	0.4	123.632	0.25	0.034	0.4	52.065	290.912	0.13	0.553639	4.59	38.33	13.4867	4.47	1.29	0.07	2.068	84.4482
60	F36	0.12	49.14	0.14	<0.02	0.05	0.221	1.66621	<0.1	0.0453285	23.67	0.42	3.5501	7.45	0.62	<0.02	5.082	8.78294
Rep 60		0.12	47.3882	0.15	<0.02	0.03	0.195	1.4898	<0.1	0.0458703	24.05	0.38	3.34101	7.27	0.68	<0.02	5.346	7.3198
																		0
Standards																		0
In-house Standard ICP-5		13.3951	621.223	10.05	14.266	9.76	15.717	954.6	1.26	49.7728	42.13	182.813	956.165	355.04	7.83	10.53	7.942	3211.68
Standard NCS ZC 73007		0.18	16.64	1.97	1.222	0.28	11.297	27.6203	0.11	0.428835	1.12	19.51	51.9999	1.05	0.69	0.07	0.604	90.3074
Blank		0.02	<0.1	<0.1	<0.02	<0.01	<0.1	<0.2	<0.1	0.0072505	<0.05	<0.2	<0.2	<0.05	0.46	<0.02	0.044	<0.2
Blank		<0.01	<0.1	<0.1	<0.02	<0.01	<0.1	<0.2	<0.1	<0.005	<0.05	<0.2	<0.2	<0.05	<0.2	<0.02	<0.02	<0.2
Assigned Value In-house Standard ICP-5		13.4	630	11	16	9	17	950		50	44	188	980	380	7	8	11	3210
Recommended Value Standard NCS ZC 73007		0.14	18	3.8	1.44	0.25	13.6	32		0.46	1.15	27.4	61	1.7	0.51		0.578	100
