# Supplementary material for: The Petrology & Geochemistry of REE-Enriched, Alkaline Vol-Canic Rocks of Ambitle Island, Feni Island Group, Papua New Guinea
Source: Preprints.org preprint supplement (doi:10.20944/preprints202306.0971.v1), 2023-06-14
Supplement: Supplementary file 3 [file 09L016 BF ES-MS_Major & Trace ELements.xls]

## Sheet: RESULTS FORM
						CERTIFICATE OF ANALYSIS
CLIENT:	MSSP-GEOMAP												SAMPLES RECEIVED:				2009-12-14
													ANALYSIS INSTRUCTIONS RECEIVED:				2009-12-14
ADDRESS:	PO Box 594,												DATE OF REPORT:				2010-01-04
	Konedobu, N.C.D.												STATUS OF REPORT:				FINAL
	Papua New Guinea												ANALYSIS COMPLETE:				2009-12-30
													PREPARATION CODE:				P6
INVOICE:	Same												ANALYSIS CODE:				BF ES/MS
P.O. NO.:	None
ATTN:	Dr. Friedrich-Karl Bandelow
CLIENT REF.:	Samples GGS1 - F36
LAB. BATCH NO.:	09L016
NO. SAMPLES:	60
SAMPLE TYPE:	Rock
Disclaimer: The results contained in this Certificate of Analysis relate only to the items tested / analysed
														Approved Signatories
													[ ]	Pedro Alvarez, General Manager
													[ ]	Andrey Tairov, Technical Manager
													[ ]	Svetlana Tairova, Senior Spectroscopist
													[ ]	Pat Gilchreest, Senior Chemist
		SiO2	Al2O3	CaO	Cr2O3	Fe2O3	K2O	MgO	MnO	Na2O	P2O5	TiO2	LOI @ 1000ºC	Ba	Ce	Dy	Er	Eu	Ga	Gd	Hf	Ho	La	Lu	Nb	Nd	Pr	Rb	Sc	Sm	Sn	Sr	Ta	Tb	Th	Tm	U	V	W	Y	Yb	Zr
LAB NO.	SAMPLE NO.	%	%	%	%	%	%	%	%	%	%	%	%	ppm	ppm	ppm	ppm	ppm	ppm	ppm	ppm	ppm	ppm	ppm	ppm	ppm	ppm	ppm	ppm	ppm	ppm	ppm	ppm	ppm	ppm	ppm	ppm	ppm	ppm	ppm	ppm	ppm
1	GG1	58.0953	17.7609	5.46947	0.00352608	4.38279	1.26588	2.3131	0.0764218	5.02811	0.147557	0.393785	0.339864	415.782	12.2322	1.27552	0.814399	0.636659	18.4456	1.55575	1.82329	0.274028	5.71918	0.128947	1.2977	8.256	1.68241	20.8966	10.3746	1.6296	1.5278	849.364	0.132632	0.25037	0.58266	0.118416	0.39312	126.895	3.4348	6.12899	0.763871	50.7479
2	GG2	60.9625	17.9964	5.48706	0.00318357	4.01268	1.3308	2.30405	0.0665859	5.2133	0.138282	0.361117	0.460645	426.564	12.0265	1.25816	0.693106	0.590255	18.8778	1.47519	1.88881	0.248176	5.38318	0.101316	1.1172	7.966	1.71899	22.7946	10.0651	1.66534	1.40802	856.605	0.119098	0.206599	0.63246	0.109307	0.40257	112.622	3.0208	5.59989	0.587049	54.6475
3	GG4	57.2277	18.0948	7.63666	0.0144699	6.49933	1.41979	3.50301	0.136128	3.75232	0.157244	0.365851	1.51848	316.838	9.87057	1.68334	1.03966	0.553132	18.3485	1.50205	1.28978	0.334349	4.32071	0.175	0.6327	6.856	1.38068	19.0929	15.9504	1.45092	1.44795	623.399	<0.1	0.267879	0.49966	0.16396	0.30807	179.975	3.1558	8.47467	1.0291	37.1578
4	GG5	59.546	18.6268	5.42555	0.00177911	4.53865	1.3863	2.31782	0.080881	5.42605	0.18717	0.402539	1.0617	453.131	15.1306	1.51847	0.875046	0.692343	20.5978	1.83325	2.27257	0.282645	6.94511	0.138158	1.5922	9.956	2.04816	25.1994	8.76425	2.03164	1.22171	915.116	0.186767	0.25037	0.79016	0.136634	0.47817	120.675	5.4868	6.3069	0.772712	66.4951
5	GG6	54.0729	18.9846	7.93648	0.00153684	6.55661	1.11503	3.32312	0.128179	4.31725	0.179444	0.477689	0.801282	293.868	12.2769	1.7354	1.08298	0.738747	18.9836	1.85115	1.62674	0.342966	5.16524	0.175	0.7847	9.136	1.75556	15.4031	14.3289	2.00484	1.27494	767.858	<0.1	0.276633	0.54116	0.145743	0.34587	205.154	0.9688	8.23819	0.984898	45.5414
6	GG7	53.3488	18.2772	7.95095	0.00178786	6.40602	1.10242	3.36749	0.127121	4.23294	0.194336	0.478246	0.239521	289.792	14.6475	1.79614	1.11763	0.803712	19.9274	2.11969	1.61738	0.394669	6.42749	0.175	0.8987	10.266	2.13959	16.8531	14.1821	2.11205	1.06201	802.385	<0.1	0.329158	0.58266	0.173069	0.37422	202.136	<0.5	8.82769	1.14404	49.1222
7	GG8	48.0738	18.6976	12.1786	0.00687962	7.0668	0.274691	6.8533	0.165832	2.56016	0.0158423	0.1693	0.857941	58.4284	2.57096	0.885054	0.571812	0.413921	15.2437	0.669565	<1	0.20509	0.960764	<0.1	<0.5	2.116	0.393173	2.50627	34.294	0.557496	<1	483.406	<0.1	0.14532	<0.1	<0.1	<0.1	126.312	<0.5	4.01633	0.534002	4.2715
8	GG9	58.0655	18.147	6.0149	0.00439111	5.08709	1.26122	2.70974	0.0810805	5.11536	0.151525	0.427263	0.48048	397.586	12.4111	1.46641	0.909701	0.618097	19.5834	1.70793	1.97305	0.274028	5.58297	0.138158	1.2027	8.786	1.77385	21.0263	12.3049	1.69214	<1	878.235	0.119098	0.25037	0.49966	0.127525	0.34587	154.418	<0.5	7.06131	0.737348	58.7809
9	GG12	55.0885	18.8385	8.03314	0.00217462	7.04249	1.1154	3.38035	0.13244	4.13949	0.171604	0.488998	0.740889	279.171	13.5025	1.70937	1.07431	0.77587	19.5217	1.90486	1.64546	0.3602	5.80091	0.175	0.8797	9.646	1.92929	16.8413	15.118	2.03164	1.19509	765.76	<0.1	0.276633	0.48306	0.173069	0.36477	226.345	<0.5	9.02846	1.01142	44.9145
10	GG13	54.371	17.8512	7.39532	0.00370791	6.76848	1.10929	3.6542	0.125808	4.07616	0.208522	0.641328	0.819508	412.286	20.6947	2.65516	1.55949	1.11926	18.8601	2.73734	1.90753	0.523928	9.61491	0.230263	3.0362	12.946	2.78878	13.7055	17.6037	2.79105	1.0487	898.384	0.295038	0.4167	0.72376	0.236832	0.46872	203.744	<0.5	11.7628	1.40927	60.4066
Rep 10		56.008	17.7917	7.42813	0.00385289	7.08229	1.15953	3.73592	0.131596	4.21435	0.205801	0.658904	0.701684	428.41	21.1867	2.4903	1.60281	1.15638	18.8601	2.8	2.00113	0.523928	9.97814	0.248684	3.2642	13.966	2.88022	14.2124	18.2873	2.71958	<1	912.749	0.335639	0.434209	0.75696	0.25505	0.47817	224.191	<0.5	12.5464	1.45348	60.4385
11	GG14	56.1542	18.1312	6.73502	0.00708431	6.6698	1.04867	3.32462	0.133146	4.00888	0.211736	0.677662	1.48416	319.363	20.0149	2.64648	1.59414	0.980046	17.784	2.84476	2.08537	0.558397	9.73296	0.239474	3.1692	13.526	2.80707	14.2478	16.0051	2.78212	<1	609.733	0.322105	0.434209	0.69886	0.236832	0.38367	169.471	<0.5	13.1907	1.50652	63.8068
12	GG15	61.1829	16.6914	5.89954	0.00816657	4.50214	1.10595	2.77745	0.0973992	4.36891	0.118399	0.391652	0.340204	329.231	9.2891	1.52715	0.970348	0.618097	15.7818	1.51995	1.72034	0.308497	4.02104	0.156579	1.2027	6.346	1.2801	17.6075	11.9578	1.45985	<1	525.674	0.159699	0.241616	0.40836	0.154851	0.27972	132.621	<0.5	7.35643	1.01142	45.467
13	GG16	58.6046	18.023	6.49546	0.00833152	5.5913	1.1552	2.97118	0.101898	4.09632	0.150573	0.483908	0.80048	355.856	12.1159	2.09116	1.25625	0.65522	17.44	1.86905	1.94497	0.386052	5.3287	0.211842	1.3262	7.696	1.61841	18.5035	15.0878	1.82616	<1	557.693	0.173233	0.337912	0.57436	0.182178	0.37422	156.961	<0.5	9.9234	1.15288	55.6782
14	GG18	57.9573	18.3428	6.59909	0.00559755	5.50224	0.967319	2.90639	0.119229	4.15052	0.170793	0.504095	0.839832	288.577	17.4654	2.35147	1.4122	0.887239	18.2251	2.4509	1.88881	0.480842	8.38898	0.239474	1.8107	11.766	2.45047	16.0514	13.6455	2.3086	<1	646.393	0.186767	0.372929	0.64906	0.209505	0.38367	140.02	<0.5	10.6163	1.45348	56.8896
15	GG19	53.8636	18.4994	6.00282	0.00526498	6.69665	0.977878	3.96486	0.133461	3.2398	0.159974	0.617541	5.40541	292.727	12.7779	2.51633	1.62013	0.812993	17.4224	2.29872	1.87009	0.541162	5.43767	0.276316	1.5352	9.146	1.81042	15.4031	19.0964	2.20139	1.48787	385.599	0.173233	0.381684	0.63246	0.245941	0.34587	189.181	<0.5	13.1896	1.63914	54.7538
16	GG21	44.6975	15.5861	13.604	0.00943513	12.5696	1.5828	6.7518	0.189385	1.64972	0.331921	1.0949	1.86522	172.486	26.9209	3.86994	1.95802	1.58329	14.688	4.52762	1.52378	0.747976	12.1757	0.267105	1.0792	20.446	3.87687	39.9942	55.0476	4.72978	<1	775.962	0.119098	0.705589	1.37116	0.291485	0.67662	431.439	<0.5	18.3429	1.7806	39.9523
17	GG22	44.2025	15.3856	13.5919	0.0104903	12.8918	1.53387	6.81382	0.190126	1.60758	0.328937	1.14056	1.90381	158.099	27.1445	4.04348	2.1313	1.58329	15.1114	4.82302	1.62674	0.76521	12.1939	0.285526	1.0602	20.416	3.93173	39.7467	56.1221	4.89059	<1	794.234	0.105564	0.714343	1.38776	0.300594	0.67662	470.351	<0.5	17.3076	1.7806	40.303
18	GG23	59.9302	18.2514	5.67912	0.00282811	5.27864	1.33621	0.784411	0.0578578	3.56036	0.123773	0.39051	5.04	296.234	25.7043	1.87423	1.10897	0.877958	16.6021	2.39719	1.97305	0.377435	13.2836	0.156579	2.6372	14.936	3.38311	27.286	12.2982	2.6213	<1	416.732	0.240902	0.337912	2.45016	0.154851	0.89397	109.02	0.5008	9.46761	1.01142	58.579
19	GG24	57.3051	19.0395	6.84476	0.00269354	6.15268	1.19336	3.09916	0.122947	4.41734	0.113283	0.444471	0.639105	332.717	13.6009	1.50112	0.866382	0.673782	19.5481	1.79744	1.65482	0.317114	5.85539	0.147368	1.0032	9.066	1.83785	17.525	15.1107	1.83509	<1	766.552	0.105564	0.25037	0.67396	0.136634	0.30807	151.651	<0.5	6.97083	0.896487	49.0266
20	GG25	57.2106	17.7698	6.63544	0.00558586	5.97966	0.999514	3.11364	0.117434	4.1708	0.140642	0.561524	0.8182	316.132	13.2788	2.08248	1.23026	0.812993	17.5018	2.18235	1.75777	0.429138	5.61021	0.202632	1.8867	9.136	1.85614	14.236	17.0318	2.11205	<1	628.984	0.200301	0.355421	0.43326	0.200396	0.17577	95.6558	<0.5	10.2757	1.31202	52.5543
Rep 20		57.3163	17.89	6.7374	0.00616491	5.88225	0.992064	3.07941	0.115749	4.1408	0.141988	0.561245	0.821314	296.279	13.0015	2.10851	1.33423	0.794432	16.2051	2.18235	1.70162	0.429138	5.79183	0.202632	1.8202	8.916	1.83785	13.623	16.0429	1.93337	<1	588.243	0.213835	0.329158	0.45816	0.218614	0.18522	94.578	<0.5	9.69439	1.21477	48.5909
21	GG26	53.8109	18.3189	8.18542	0.00231456	7.62047	0.56562	3.51513	0.166445	3.79147	0.172677	0.897359	1.09846	159.822	19.2992	4.1129	2.50384	1.1471	17.6076	3.82941	2.78736	0.868617	8.05298	0.414474	2.5992	13.756	2.73392	9.28475	16.1544	3.39858	<1	426.083	0.295038	0.626801	0.91466	0.400792	0.38367	194.499	6.6118	20.9134	2.61166	82.3592
22	GG27	53.0406	17.9694	8.04663	0.002052	7.05611	0.684056	2.99191	0.144616	3.55446	0.153178	0.846432	1.79892	164.514	14.8354	3.84391	2.45186	1.09142	17.5106	3.56087	2.34744	0.816914	6.08242	0.396053	1.5827	12.116	2.30418	10.3339	15.4454	3.23776	<1	418.633	0.200301	0.609293	0.68226	0.364356	0.27972	186.063	5.5048	19.6667	2.34643	71.8398
23	GG28	56.9167	17.941	8.04939	0.00275815	6.60101	0.962498	3.927	0.130775	3.83436	0.138935	0.615595	0.720288	264.042	12.0354	2.6031	1.44686	0.785151	16.6991	2.20921	1.78585	0.532545	5.15616	0.239474	1.3547	8.936	1.74642	14.5779	18.1005	2.04058	<1	548.283	0.132632	0.399192	0.49966	0.236832	0.34587	200.126	<0.5	13.0871	1.56841	53.9569
24	GG29	50.1761	18.1853	8.515	0.00774975	9.87151	0.792574	5.27382	0.190969	2.87674	0.144524	0.720543	1.80108	153.074	13.1625	2.79399	1.7241	0.924362	16.9196	2.71944	1.27106	0.644569	5.93712	0.276316	0.5187	10.826	2.00244	11.5364	28.9695	2.48729	<1	494.623	<0.1	0.442963	0.64076	0.273267	0.27027	280.584	<0.5	15.2978	1.81596	32.95
25	GG30	52.3171	19.3408	9.3158	0.00145283	7.836	1.08276	2.78154	0.151861	3.59799	0.183613	0.770103	1.78392	253.743	22.0097	3.72243	2.23527	1.28631	18.1721	3.71304	1.79521	0.756593	10.8953	0.313158	1.3832	17.286	3.39226	17.4779	15.6225	3.59513	<1	621.009	0.119098	0.600539	1.46246	0.346139	0.60102	235.92	<0.5	20.0469	1.9751	47.9853
26	GG31	53.2968	19.7642	9.26547	0.00294479	7.57128	0.85418	3.91153	0.145336	3.6876	0.153691	0.54202	0.679864	252.584	10.3178	2.21263	1.36888	0.803712	18.1721	2.26292	1.33658	0.463607	4.68395	0.221053	0.9842	8.636	1.68241	10.4165	20.7584	2.07631	<1	611.016	<0.1	0.337912	0.35856	0.209505	0.17577	217.258	1.2298	11.8058	1.37391	34.9689
27	GG33	41.7082	23.0169	12.8188	0.0042316	11.3143	0.126647	5.77673	0.124039	1.7139	0.0419216	0.796391	1.4565	55.9718	6.5607	2.81135	1.5335	1.04501	21.9209	2.87161	<1	0.532545	2.68614	0.193421	1.4022	8.486	1.38982	0.973743	18.982	2.46942	<1	563.593	0.105564	0.434209	<0.1	0.227723	<0.1	260.233	<0.5	12.9955	1.2855	12.8251
28	GG34	42.7733	25.791	15.0339	<0.001	6.1659	0.108342	6.14635	0.0678241	1.16233	0.0163832	0.562908	1.13909	31.9477	3.55498	1.66598	0.892373	0.692343	16.9461	1.66317	<1	0.334349	1.28768	0.119737	0.7467	4.616	0.722341	1.00911	24.6482	1.30797	<1	503.24	<0.1	0.276633	<0.1	0.118416	<0.1	154.483	<0.5	7.552	0.763871	8.16047
29	GG35-A	55.57	18.8137	7.67322	0.00250856	6.10824	1.06701	3.38144	0.117212	4.15557	0.162782	0.45766	0.59976	304.399	13.4309	1.65731	1.07431	0.710905	18.0486	1.95857	1.64546	0.351583	5.80999	0.184211	0.9177	9.546	1.92929	15.3913	15.8824	1.92443	<1	755.172	<0.1	0.276633	0.50796	0.154851	0.36477	183.098	<0.5	8.23561	1.00258	45.8283
30	F1	51.8541	17.0548	1.10877	<0.001	7.97485	9.48235	2.28123	0.121418	1.70648	0.515074	0.59248	5.39137	475.064	36.7431	3.84391	2.01867	1.89884	14.8644	5.60179	1.94497	0.679038	21.9377	0.248684	1.9627	31.726	6.57422	193.612	9.62053	6.10565	<1	2332.8	0.173233	0.723098	1.88576	0.25505	3.69117	170.563	5.2168	18.7611	1.68335	63.5943
Rep 30		50.9867	17.1915	1.10662	<0.001	7.99176	9.54441	2.26672	0.122461	1.70806	0.503622	0.586796	5.4967	480.85	37.2888	3.75714	1.98401	2.02877	14.6527	5.90614	1.91689	0.713507	22.2283	0.267105	2.0197	32.246	6.70222	193.565	9.63003	6.41835	<1	2324.31	0.213835	0.723098	1.98536	0.282376	3.85182	171.094	6.0718	18.8707	1.6745	62.5424
31	F2	47.453	19.0073	6.47006	<0.001	9.32141	2.90713	3.0929	0.295028	2.78179	0.424131	0.846643	6.10244	334.933	49.7142	6.08257	3.58682	2.38144	20.3155	7.16829	3.13367	1.28224	27.0776	0.571053	5.8292	35.816	7.47943	42.682	9.25068	7.27603	<1	883.389	0.606316	1.06451	3.01456	0.555644	1.95237	239.801	<0.5	31.3875	3.69027	106.904
32	F3	57.1744	20.1114	3.33437	0.00340234	5.30421	1.7052	1.3864	0.0684644	3.37879	0.0475643	0.572522	5.18622	258.593	12.3574	1.70937	1.19561	0.785151	18.816	1.77059	2.96519	0.3602	7.57169	0.221053	4.2237	8.576	1.77385	39.2869	9.41843	1.87976	<1	748.456	0.457444	0.294141	1.51226	0.209505	1.16802	125.374	<0.5	8.64845	1.34738	89.999
33	F4	46.7339	9.33227	16.6065	0.0222775	9.55176	1.47352	10.3189	0.156468	1.93974	0.243959	0.648789	0.861551	124.185	21.1778	2.50765	1.16095	1.25847	10.7893	3.56982	1.42082	0.446373	9.34248	0.156579	0.9272	17.046	3.13624	23.7376	61.3118	3.74701	<1	792.1	0.105564	0.460471	0.83166	0.16396	0.63882	241.487	<0.5	10.8525	1.01142	32.7269
34	F5	48.2873	15.3004	11.4897	0.0069306	10.5938	2.44125	6.40772	0.185393	3.45861	0.510587	0.935296	0.359856	151.848	34.6141	3.90465	1.97535	1.83387	16.4433	5.29744	2.08537	0.739359	15.1634	0.276316	2.2857	25.516	5.08382	45.3816	32.1984	5.5696	<1	1301	0.200301	0.696835	1.11386	0.282376	0.81837	336.549	<0.5	17.6356	1.75407	62.3192
35	F6	49.1115	17.8145	9.04192	0.00207463	9.78807	3.73362	3.82779	0.202703	4.70058	0.640572	0.779755	2.9535	336.757	46.7711	4.02613	1.95802	2.05661	19.3717	6.03146	2.30064	0.722124	22.4281	0.257895	2.8462	31.516	6.47364	40.23	12.1244	6.44515	1.34148	2790.43	0.26797	0.766869	2.10986	0.309703	1.49877	343.762	2.0848	16.9551	1.74523	70.9047
36	F7	44.7764	14.185	12.8364	0.00660242	10.4045	1.98071	7.327	0.191034	1.74456	0.384468	1.02389	3.53505	153.2	31.1879	4.16496	2.10531	1.76891	14.8115	5.01995	2.11345	0.791062	14.4278	0.322368	2.4947	22.916	4.44377	36.5873	32.7458	5.03354	1.16847	1092.28	0.26797	0.705589	1.34626	0.33703	0.84672	334.519	<0.5	19.0325	1.9309	58.5365
37	F8	47.1293	13.3528	12.2746	0.0137018	10.8277	2.20368	7.53135	0.183785	2.93572	0.410161	0.783226	2.38525	256.197	32.333	3.0543	1.51617	1.56473	15.5436	4.33069	1.81393	0.523928	15.5448	0.202632	1.7157	24.296	4.79122	38.2495	36.2523	4.70298	1.18178	1283.43	0.186767	0.556768	1.27986	0.227723	0.95067	330.63	<0.5	13.2019	1.2855	49.2285
38	F9	48.9637	18.8383	6.93226	0.00103379	6.3667	3.90183	2.48904	0.172247	4.35784	0.44179	0.599466	3.08185	357.746	44.5347	3.50551	1.87138	1.79675	17.4753	4.93043	2.16025	0.635952	22.3101	0.276316	2.3047	29.016	6.07132	47.9751	5.62639	5.81082	<1	2704.05	0.227368	0.696835	2.20946	0.282376	1.77282	256.385	<0.5	17.4945	1.66566	70.756
39	F10	44.65	15.7819	9.84354	<0.001	9.66046	2.27132	4.84213	0.196776	3.25808	0.62909	0.822463	7.21423	365.5	42.0121	3.34932	1.6288	1.88028	17.8546	5.3601	1.97305	0.601483	19.2044	0.221053	2.2192	29.716	5.97074	50.9459	13.2563	6.22179	<1	1954.34	0.227368	0.653064	1.76126	0.245941	1.24362	360.359	<0.5	16.1715	1.43579	63.2968
40	F11	47.1689	10.0244	15.5342	0.027218	10.5806	1.62481	10.2014	0.178219	2.11568	0.416181	0.719699	1.26151	103.779	29.3809	2.87209	1.4122	1.53689	11.9713	4.62609	1.57994	0.541162	12.8568	0.156579	1.0697	23.086	4.46205	29.9503	53.1822	5.00674	<1	999.607	<0.1	0.565522	0.78186	0.209505	0.64827	273.497	0.6808	11.8708	1.09983	40.7599
Rep 40		46.5351	9.95131	15.3028	0.0264644	10.022	1.52508	10.0237	0.169313	1.98975	0.401099	0.716109	1.19832	100.086	29.7566	2.95018	1.42953	1.52761	11.5567	4.16061	1.46762	0.506693	12.9204	0.184211	0.9937	23.376	4.46205	29.6909	50.3597	4.9174	<1	987.737	<0.1	0.574276	0.75696	0.191287	0.61047	271.921	<0.5	11.9216	1.09983	39.4954
41	F12	66.9667	15.9761	0.460585	0.00315542	1.45161	5.83467	0.88755	0.0414834	5.62315	0.0900897	0.163217	1.75859	232.472	6.02396	0.537974	0.225259	0.228306	17.0696	0.624808	1.6361	<0.1	3.68505	<0.1	1.8962	3.046	0.649192	79.8399	1.40758	0.602167	<1	528.682	0.146165	<0.1	0.32536	<0.1	1.13967	39.8195	7.2598	1.31031	0.206882	43.82
42	F14	60.0096	18.2987	5.01711	0.00226578	4.10005	1.64959	1.66212	0.0965143	4.69488	0.138403	0.387859	1.08022	287.29	23.1816	2.98489	1.62013	1.22135	15.8435	3.85627	2.34744	0.575631	13.3926	0.230263	3.5397	17.586	3.56599	34.4889	5.95211	3.29137	<1	1172	0.335639	0.512997	1.19686	0.227723	1.02627	78.0138	<0.5	14.766	1.38275	75.5269
43	F15	44.5443	11.0603	12.9363	0.0536051	10.958	1.3944	10.5523	0.186057	1.93489	0.441945	0.745026	1.98079	127.24	29.2288	3.20181	1.3169	1.6761	12.2976	4.66189	1.57994	0.54978	12.6933	0.165789	1.1362	22.996	4.44377	29.7734	34.9293	5.23903	<1	1024.89	0.146165	0.574276	0.76526	0.191287	0.61992	299.757	<0.5	12.7903	1.15288	42.4493
44	F16	45.4953	14.2596	12.4896	0.00499882	10.4583	1.78688	6.2799	0.16678	2.64612	0.466368	0.99381	3.41658	147.316	31.4563	3.86126	2.036	1.73179	15.1996	5.26164	1.80457	0.739359	14.4732	0.257895	2.3617	23.676	4.54435	51.4882	32.9462	5.19436	<1	2418.58	0.227368	0.696835	1.14706	0.300594	0.96012	343.55	<0.5	17.8208	1.8248	50.9605
45	F17	47.8186	13.6432	11.8227	0.0120968	10.6207	2.69895	6.98263	0.182588	3.45304	0.450068	0.766199	1.27847	236.071	32.3866	3.2452	1.49018	1.56473	14.8732	4.50077	1.72034	0.592866	14.9999	0.184211	1.6967	23.436	4.73636	45.2873	33.1647	4.97994	<1	1259.23	0.159699	0.591785	1.50396	0.218614	1.06407	327.824	1.0678	13.3549	1.21477	47.4221
46	F18	81.8904	1.00723	0.299637	<0.001	0.527401	0.980738	0.549318	0.00881779	1.09544	0.0443492	0.0513581	9.91818	182.816	2.401	0.164863	<0.1	<0.1	216.211	0.186189	<1	<0.1	1.03341	<0.1	<0.5	1.136	0.292594	35.6442	1.19719	0.217995	<1	166.572	<0.1	<0.1	<0.1	<0.1	1.33812	62.524	4.0648	<0.5	<0.1	5.25968
47	F19	44.8246	13.0147	14.0518	0.0213721	9.92413	1.2556	8.02294	0.175418	1.63408	0.378345	0.959679	1.60064	112.816	24.2372	3.63566	1.99268	1.52761	13.7266	4.24118	1.57058	0.70489	10.8318	0.257895	2.1432	18.836	3.60256	28.9718	43.9995	4.53323	<1	886.735	0.227368	0.591785	0.88146	0.291485	0.67662	318.332	<0.5	17.2666	1.70987	44.5426
48	F22	48.8805	17.9309	9.10712	<0.001	8.59592	2.55069	3.10845	0.244094	4.05689	0.443209	0.788603	0.960192	292.415	45.7692	4.62484	2.79841	1.96381	17.59	5.50332	2.60016	0.946172	23.0002	0.432895	4.8317	29.116	6.14447	40.7133	10.3893	5.9359	<1	1456.46	0.498045	0.784377	2.32566	0.409901	1.70667	230.593	<0.5	26.2116	2.65587	88.7239
49	F23	49.0842	18.8527	8.1696	<0.001	7.65848	2.66859	2.69986	0.222719	3.37438	0.465246	0.718292	2.497	299.261	52.0043	5.31032	3.17962	2.14942	19.0718	6.21049	2.74056	1.08405	28.0492	0.506579	5.1737	33.526	7.21426	45.0987	8.37647	6.49875	<1	1592.5	0.511579	0.91569	2.68256	0.491881	1.89567	200.681	<0.5	31.6563	3.01835	93.0166
50	F24	48.2587	18.3	8.67488	0.00207087	8.22822	2.63469	2.92387	0.247502	3.90803	0.441366	0.770419	1.93613	321.665	50.2778	5.05869	2.96303	2.03805	17.6429	5.89719	2.80608	0.963407	25.5247	0.442105	5.1167	31.256	6.68394	43.3422	9.31915	6.32007	<1	1641.16	0.565714	0.854411	2.65766	0.464554	1.87677	223.428	<0.5	27.0757	2.85037	92.5597
Rep 50		49.2257	18.4124	8.63497	<0.001	8.15507	2.74251	2.92884	0.248974	4.04764	0.45389	0.754987	1.86149	335.596	51.0024	5.36238	3.05833	2.08445	19.31	6.19258	2.82479	1.04958	26.5781	0.451316	5.3637	31.676	6.96739	46.4308	9.32206	6.54343	<1	1801.56	0.538647	0.871919	2.75726	0.482772	1.80117	222.962	<0.5	27.262	2.94762	98.2657
51	F25	51.5405	9.77389	0.141542	0.00759256	8.54391	1.70511	<0.01	0.0109022	1.4798	0.274075	0.786289	21.5228	880.867	38.8096	3.29726	1.44686	2.06589	10.3659	5.22583	1.96369	0.532545	17.7424	0.128947	2.3237	31.566	6.10789	5.60669	10.9293	6.9276	<1	1030.54	0.227368	0.661818	1.28816	0.16396	1.34757	226.263	19.8778	10.1709	0.869964	60.4173
52	F26	80.1652	1.47648	0.234385	<0.001	0.679384	1.0138	0.424183	0.00810249	1.14135	0.0400014	0.0570007	10.18	266.422	5.80032	0.199571	0.11263	0.135499	248.521	0.266752	<1	<0.1	3.43078	<0.1	<0.5	2.376	0.612618	36.9409	1.02302	0.343074	<1	176.273	<0.1	<0.1	0.45816	<0.1	1.56492	68.8462	4.1098	<0.5	0.100789	5.75908
53	F27	83.9653	0.20292	0.105251	<0.001	0.0544527	0.467145	0.0359854	0.00266811	0.773503	<0.01	<0.01	9.91009	18.2544	<0.5	<0.1	<0.1	<0.1	445.096	<0.1	<1	<0.1	<0.5	<0.1	<0.5	<0.5	<0.1	19.5055	<1	<0.1	<1	79.5512	<0.1	<0.1	<0.1	<0.1	0.18522	18.629	0.7258	<0.5	<0.1	1.17944
54	F29	47.5574	15.9644	7.38517	0.0028439	10.0413	4.06303	3.83709	0.189849	3.85903	0.539726	0.715603	4.08736	357.98	40.2677	3.55757	1.70677	1.83387	15.8611	5.20793	1.87009	0.644569	19.722	0.230263	1.9532	27.066	5.63243	78.0716	14.4387	5.63214	<1	1882.9	0.173233	0.661818	1.78616	0.227723	1.44207	320.897	5.5048	15.7559	1.40927	57.814
55	F30	55.4459	21.6267	0.199724	0.00664003	4.28268	2.99461	0.258443	0.00646555	3.95564	0.116374	0.460613	9.26849	873.826	20.8647	0.893731	0.528493	0.608817	20.1391	1.44834	2.01049	0.187856	11.1133	<0.1	2.1527	11.346	2.57848	46.0772	8.18689	1.95123	<1	1323.05	0.159699	0.180337	0.80676	<0.1	1.06407	191.421	34.3228	2.96519	0.498638	53.415
56	F31	78.1948	4.5167	0.0603076	0.00189974	2.95528	1.55562	0.149212	0.0228277	1.02563	0.0339205	0.109023	8.29834	411.539	4.92365	0.43385	0.259915	0.256148	370.148	0.696419	<1	0.110301	2.15945	<0.1	<0.5	3.526	0.667479	77.7179	2.58095	0.73618	<1	825.74	<0.1	<0.1	<0.1	<0.1	0.19467	246.451	18.7078	1.13696	0.251087	8.28798
57	F33	65.1587	14.9653	0.164873	0.00407741	0.865713	2.44458	0.0279955	0.00199817	5.00407	0.121417	0.167457	9.43623	373.667	3.46552	0.17354	<0.1	0.163341	17.3959	0.302558	1.65482	<0.1	1.58735	<0.1	2.0102	2.346	0.521183	15.073	2.21899	0.468153	<1	1941.67	0.146165	<0.1	0.23406	<0.1	0.36477	45.0452	0.8338	<0.5	0.10963	44.7657
58	F34	86.4317	0.224686	0.0961103	<0.001	0.0674177	0.464415	0.0495491	0.00269207	1.00679	<0.01	<0.01	9.40257	34.3112	0.540314	<0.1	<0.1	<0.1	346.906	<0.1	<1	<0.1	<0.5	<0.1	<0.5	<0.5	<0.1	18.362	<1	<0.1	<1	76.8577	<0.1	<0.1	<0.1	<0.1	0.24192	16.5752	0.6808	<0.5	<0.1	1.66822
59	F35	61.4353	15.4204	0.142798	0.00303619	5.71099	5.94574	0.487899	0.00618166	2.29394	0.085805	0.815321	5.38815	27.8239	16.2846	4.74632	2.85906	1.18422	13.9206	4.7156	2.37552	0.997876	8.64324	0.432895	1.1172	14.646	2.75221	88.0566	27.7598	3.78275	<1	29.5285	0.132632	0.766869	0.54946	0.446337	0.59157	204.899	2.5798	26.2613	2.70891	65.9745
60	F36	87.8197	0.219815	0.0289859	<0.001	0.164801	0.207914	<0.01	<0.001	0.284567	<0.01	0.0122539	9.62963	12.8093	<0.5	<0.1	<0.1	<0.1	100.821	<0.1	<1	<0.1	<0.5	<0.1	<0.5	<0.5	<0.1	14.0474	<1	<0.1	<1	89.2059	<0.1	<0.1	<0.1	<0.1	<0.1	15.6313	2.0668	<0.5	<0.1	2.06137
Rep 60		87.1747	0.214261	0.0379068	<0.001	0.16044	0.210589	0.0155088	0.00112547	0.297055	<0.01	0.0114228	9.65682	12.5579	0.500799	<0.1	<0.1	<0.1	101.881	<0.1	<1	<0.1	<0.5	<0.1	<0.5	<0.5	<0.1	14.1951	<1	<0.1	<1	90.1444	<0.1	<0.1	<0.1	<0.1	<0.1	12.9658	2.08854	<0.5	<0.1	2.08305
Standards
Standard SY-4		50.2649	20.8788	8.12857	0.00109601	6.34946	1.70837	0.54437	0.111285	7.34614	0.129393	0.2872	4.4964	354.942	130.904	20.0439	15.5082	2.18654	31.844	15.2425	11.4078	4.6602	61.567	2.275	9.9332	69.766	16.4401	53.4215	<1	13.8963	10.3778	1195.48	0.985263	2.86788	1.20516	2.53228	0.85617	11.3767	<0.5	120.805	15.3252	498.437
Standard SY-3		57.1274	11.5803	8.15409	<0.001	6.4819	4.21206	2.67885	0.333571	4.16205	0.50037	0.155749		451.933	2296.93	123.751	80.4176	17.9731	27.3896	123.134	9.03972	26.8237	1324.6	8.17895	119.706	817.446	231.926	195.121	7.07663	123.582	7.68956	290.789	24.8319	19.1332	991.85	11.6412	703.558	49.0574	1.0048	691.317	63.0494	303.489
Standard NCS ZC73007		60.2681	17.5327	0.391213	0.00968895	5.14262	2.3579	0.800425	0.0551951	0.417507	0.204504	0.926987		396.456	128.409	6.79409	3.84674	1.6297	18.7014	8.58261	7.28007	1.37703	62.2299	0.552632	15.7377	57.916	14.1359	150.442	13.5043	9.75975	15.781	58.4227	5.81684	1.20458	28.147	0.564752	6.78132	99.3343	4.9558	36.8274	3.46925	216.029
Standard NCS DC73305		52.7616	17.5831	0.564925	0.0141639	7.0532	3.97148	1.84851	0.0208205	0.434809	0.14557	0.608911		421.553	111.564	4.97192	2.59915	1.73179	20.0685	6.73862	2.38488	0.885852	57.9891	0.331579	7.6247	53.246	13.1301	187.07	17.1667	8.05331	2.27306	80.519	2.01383	0.889428	11.3561	0.391683	1.65942	84.1795	0.7978	23.797	2.21381	72.3073
Blank		<0.01	<0.01	<0.01	<0.001	<0.01	<0.01	<0.01	<0.001	<0.01	<0.01	<0.01		<0.5	<0.5	<0.1	<0.1	<0.1	<0.5	<0.1	<1	<0.1	<0.5	<0.1	<0.5	<0.5	<0.1	<0.5	<1	<0.1	<1	<0.5	<0.1	<0.1	<0.1	<0.1	<0.1	<5	<0.5	<0.5	<0.1	<1
Blank		0.0122419	<0.01	<0.01	<0.001	<0.01	<0.01	<0.01	<0.001	0.0220245	<0.01	<0.01		<0.5	0.664232	<0.1	<0.1	<0.1	<0.5	0.159335	<1	<0.1	3.20376	<0.1	<0.5	0.626	0.640049	<0.5	<1	0.405614	<1	1.50884	0.227368	<0.1	<0.1	<0.1	<0.1	<5	<0.5	<0.5	<0.1	<1
Recommended Value Standard SY-4		49.9	20.69	8.05		6.21	1.66	0.54	0.108	7.1	0.131	0.287	4.56	340	122	18.2	14.2	2	35	14	10.6	4.3	58	2.1	13	57	15	55	1.1	12.7	7.1	1191	0.9	2.6	1.4	2.3	0.8	8		119	14.8	517
Recommended Value Standard SY-3		59.68	11.8	8.26		6.42	4.2	2.67	0.32	4.15	0.54	0.15		430	2200			14			9	20	1350	8	130	800		208	7	100	6	306		11	990	8	650	51		740	65	320
Recommended Value Standard NCS DC 73007		63.8	17.85	0.4	0.0097954	5.44	2.5	0.84	0.0569331	0.33	0.222685	0.964104		411	133	7.4	3.8	1.66	25.1	8.5	8.2	1.41	67	0.58	26	57	14.6	173	14	10.4	12.4	68	2.8	1.3	28.2	0.57	5.9	105	5.8	38	3.8	275
Recommended Value Standard NCS ZC 73305		59.23	18.82	0.6	0.0144738	7.6	4.16	2.01	0.0223343	0.35	0.158079	0.65886		450	109	5.1	2.7	1.7	26	6.7	2.9	0.98	62	0.41	14.3	48	13.6	205	18.5	8.4	2	90	0.9	1.02	12.8	0.43	1.5	87	0.79	26	2.6	96
