# Supplementary material for: The Petrology & Geochemistry of REE-Enriched, Alkaline Vol-Canic Rocks of Ambitle Island, Feni Island Group, Papua New Guinea
Source: Preprints.org preprint supplement (doi:10.20944/preprints202306.0971.v1), 2023-06-14
Supplement: Supplementary file 4 [file 09L016_Gold Analyses.xls]

## Sheet: RESULTS FORM
						CERTIFICATE OF ANALYSIS
CLIENT:	MSSP-GEOMAP										SAMPLES RECEIVED:				2009-12-14
											ANALYSIS INSTRUCTIONS RECEIVED:				2009-12-14
ADDRESS:	PO Box 594,										DATE OF REPORT:				2010-01-05
	Konedobu, N.C.D.										STATUS OF REPORT:				FINAL
	Papua New Guinea										ANALYSIS COMPLETE:				2010-01-05
											PREPARATION CODE:				P6
INVOICE:	Same										ANALYSIS CODE:				Au1
P.O. NO.:	None
ATTN:	Dr. Friedrich-Karl Bandelow
CLIENT REF.:	Samples GGS1 - F36
LAB. BATCH NO.:	09L016
NO. SAMPLES:	60
SAMPLE TYPE:	Rock
Notes/Comments:
Au analysis weight is 25gm except where indicated otherwise in brackets.
Disclaimer: The results contained in this Certificate of Analysis relate only to the items tested / analysed
																	Approved Signatories
																[ ]	Timothy Elliott, Managing Director
																[ ]	Andrey Tairov, Technical Manager
																[ ]	Svetlana Tairov, Senior Spectroscopist
																[ ]	Pat Gilchreest, Senior Chemist
			Au1		Repeat Au1
			Wet Geochem		Wet Geochem
LAB NO.	SAMPLE NO.		Auppb		Auppb
1	GG1		-2
2	GG2		-2
3	GG4		-2
4	GG5		-2
5	GG6		-2
6	GG7		-2
7	GG8		-2
8	GG9		-2
9	GG12		-2
10	GG13		-2		-2
11	GG14		-2
12	GG15		-2
13	GG16		-2
14	GG18		-2
15	GG19		-2
16	GG21		-2
17	GG22		-2
18	GG23		-2
19	GG24		-2
20	GG25		-2		-2
21	GG26		-2
22	GG27		7
23	GG28		-2
24	GG29		3
25	GG30		-2
26	GG31		-2
27	GG33		-2
28	GG34		-2
29	GG35-A		2
30	F1		6		-2
31	F2		-2
32	F3		3
33	F4		-2
34	F5		-2
35	F6		6
36	F7		2
37	F8		-2
38	F9		4
39	F10		-2
40	F11		-2		-2
41	F12		9
42	F14		-2
43	F15		-2
44	F16		-2
45	F17		-3	17
46	F18		23
47	F19		-2
48	F22		-2
49	F23		-2
50	F24		-2		-2
51	F25		172
52	F26		23
53	F27		14
54	F29		7
55	F30		3
56	F31		1332
57	F33		-2	24
58	F34		15
59	F35		197
60	F36		55		31
Standards
Standard GLG307-4			50
Standard GLG907-5			66
Blank			-2
Blank			-2
Recommended Value Standard GLG307-4			52.29
Recommended Value Standard GLG907-5			82
