# Supplementary material for: The Petrology & Geochemistry of REE-Enriched, Alkaline Vol-Canic Rocks of Ambitle Island, Feni Island Group, Papua New Guinea
Source: Preprints.org preprint supplement (doi:10.20944/preprints202306.0971.v1), 2023-06-14
Supplement: Supplementary file 5 [file SampleListIreland_OMAC Lab_2009_2010.xlsx]

## Sheet: Sheet1
Field Sample No	Sample #	Description	Origin	Total Samples	61
	GG1	Dacite	Gallego, Guadalcanal, Solomon Islands
	GG2	Andesite	Gallego, Guadalcanal, Solomon Islands
	GG4	Dacite	Gallego, Guadalcanal, Solomon Islands
	GG5	Dacite	Gallego, Guadalcanal, Solomon Islands
	GG6	Andesite	Gallego, Guadalcanal, Solomon Islands
	GG7	Andesite	Gallego, Guadalcanal, Solomon Islands
	GG8	Plag & Hbl Xeno	Gallego, Guadalcanal, Solomon Islands
	GG9	Dacite	Gallego, Guadalcanal, Solomon Islands
	GG12	Dacite	Gallego, Guadalcanal, Solomon Islands
	GG13	Dacite	Gallego, Guadalcanal, Solomon Islands
	GG14	Dacite	Gallego, Guadalcanal, Solomon Islands
	GG15	Dacite	Gallego, Guadalcanal, Solomon Islands
	GG16	Dacite	Gallego, Guadalcanal, Solomon Islands
	GG18	Dacite	Gallego, Guadalcanal, Solomon Islands
	GG19	Dacite	Gallego, Guadalcanal, Solomon Islands
	GG21	Ultramafic (hornblendite?)	Gallego, Guadalcanal, Solomon Islands
	GG22	Ultramafic (hornblendite?)	Gallego, Guadalcanal, Solomon Islands
	GG23	Propylitic Altered Andesite/Dacite	Gallego, Guadalcanal, Solomon Islands
	GG24	Hematised Andesite	Gallego, Guadalcanal, Solomon Islands
	GG25	Hematised Andesite	Gallego, Guadalcanal, Solomon Islands
	GG26	Mafic?	Gallego, Guadalcanal, Solomon Islands
	GG27	Mafic?	Gallego, Guadalcanal, Solomon Islands
	GG28	Dacite	Gallego, Guadalcanal, Solomon Islands
	GG29	Mafic?	Gallego, Guadalcanal, Solomon Islands
	GG30	Andesite/Dacite	Gallego, Guadalcanal, Solomon Islands
	GG31	Andesite	Gallego, Guadalcanal, Solomon Islands
	GG33	Plag & Hbl Xeno	Gallego, Guadalcanal, Solomon Islands
	GG34	Mafic Xeno	Gallego, Guadalcanal, Solomon Islands
	GG35-A	Andesite/Dacite	Gallego, Guadalcanal, Solomon Islands
OPA6B	F1	Andesite	Feni Island
OPB2	F2	Porphyritic Andesite	Feni Island
OPB4	F3	Porphyritic Andesite	Feni Island
OPB4	F4	Hornblende Andesite	Feni Island
OPA12c	F5	Hornblende Basaltic Andesite	Waramung beach, Feni Island
OPA12c	F6	Hornblende Basaltic Andesite	Waramung beach, Feni Island
OPA12c	F7	Basalt	Waramung beach, Feni Island
OPA12c	F8	Vesicular Basalt	Waramung beach, Feni Island
OPA12c	F9	Basalt	Waramung beach, Feni Island
OPA12c	F10	Amygdaloidal Basalt	Waramung beach, Feni Island
OPA12c	F11	Olivine Basalt	Waramung beach, Feni Island
OPA12c	F12	Andesite	Waramung beach, Feni Island
OPB5	F14	Porphyritic Andesite	Feni Island
OPA12d	F15	Basalt	Waramung beach, Feni Island
OPA12d	F16	Spherulitic Basalt	Waramung beach, Feni Island
OPA12d	F17	Olivine Basalt	Waramung beach, Feni Island
OPA4	F18	Sinter	Waramung fumarole, Feni Island
OPA11	F19	Olivine Basalt	Waramung beach, Feni Island
OPB3	F22	Andesite	Feni Island
OPB1	F23	Andesite	Feni Island
OPB6	F24	Andesite	Feni Island
OPA7	F25	Sinter	Kapkai fumarole, Feni Island
OPA2	F26	Sinter	Waramung fumarole, Feni Island
OPA5	F27	Sinter	Waramung fumarole, Feni Island
OPA6A	F28	Andesite (xenolith)	Kapkai fumarole area, Feni Island
OPA6c	F29	fossil fumarole	Kapkai fumarole area, Feni Island
OPA10	F30	Sinter	Kapkai fumarole area, Feni Island
OPA9	F31	Sinter	Kapkai fumarole area, Feni Island
OPA12	F33	Andesite	Waramung beach, Feni Island
OPA1	F34	Sinter (laminated)	Waramung fumarole, Feni Island
OPB7	F35	Sinter	Kapkai fumarole, Feni Island
OPA8	F36	Sinter	Kapkai fumarole, Feni Island
