# Supplementary material for: The Petrology & Geochemistry of REE-Enriched, Alkaline Vol-Canic Rocks of Ambitle Island, Feni Island Group, Papua New Guinea
Source: Preprints.org preprint supplement (doi:10.20944/preprints202306.0971.v1), 2023-06-14
Supplement: Supplementary file 6 [file 10110111 BF ES-MS_Major & trace elements.xls]

## Sheet: RESULTS FORM
						CERTIFICATE OF ANALYSIS
CLIENT:	MSSP-GEOMAP												SAMPLES RECEIVED:				2010-11-24
													ANALYSIS INSTRUCTIONS RECEIVED:				2010-11-24
ADDRESS:	PO Box 594,												DATE OF REPORT:				2010-12-22
	Konedobu, N.C.D.												STATUS OF REPORT:				FINAL
	Papua New Guinea												ANALYSIS COMPLETE:				2010-12-22
													PREPARATION CODE:				P1
INVOICE:	Same												ANALYSIS CODE:				BF ES/MS
P.O. NO.:	None
ATTN:	Dr. Friedrich-Karl Bandelow
CLIENT REF.:	OP-N1 to OP Ol 1
LAB. BATCH NO.:	10110111
NO. SAMPLES:	22
SAMPLE TYPE:	Prepared
Disclaimer: The results contained in this Certificate of Analysis relate only to the items tested / analysed
														Approved Signatories
													[ ]	Pedro Alvarez, General Manager
													[ ]	Andrey Tairov, Technical Manager
													[ ]	Svetlana Tairova, Senior Spectroscopist
													[ ]	Pat Gilchreest, Senior Chemist
		SiO2	Al2O3	CaO	Cr2O3	Fe2O3	K2O	MgO	MnO	Na2O	P2O5	TiO2	LOI @ 1000ºC	Ba	Ce	Dy	Er	Eu	Ga	Gd	Hf	Ho	La	Lu	Nb	Nd	Pr	Rb	Sc	Sm	Sn	Sr	Ta	Tb	Th	Tm	U	V	W	Y	Yb	Zr
LAB NO.	SAMPLE NO.	%	%	%	%	%	%	%	%	%	%	%	%	ppm	ppm	ppm	ppm	ppm	ppm	ppm	ppm	ppm	ppm	ppm	ppm	ppm	ppm	ppm	ppm	ppm	ppm	ppm	ppm	ppm	ppm	ppm	ppm	ppm	ppm	ppm	ppm	ppm
1	OP-N1	52.9985	15.7278	1.38522	0.00903654	10.0314	3.74754	5.19938	0.215067	3.24946	0.441225	0.951881	4.77	535.394	33.876	3.18872	1.73132	1.53527	19.2876	4.22261	1.90453	0.631413	17.1506	0.208456	8.316	18.0574	4.30745	44.3677	23.3666	4.50793	1.112	920.622	1.143	0.656075	2.07316	0.270107	1.3	272.904	0.52	18.0171	1.57367	69.9523
Rep 1		52.7241	16.1446	1.4375	0.00880081	10.3424	3.82468	5.17936	0.219447	3.33825	0.455844	0.96593	4.9	517.436	32.391	3.2514	1.63602	1.53527	18.897	4.17416	2.24347	0.647398	16.0132	0.193015	8.217	18.3891	4.19536	42.065	23.0303	3.92823	1.392	898.686	1.89	0.615576	1.81711	0.237367	1.17	260.305	<0.5	17.5074	1.41547	67.0089
2	OP-N2	56.9204	17.6424	0.327704	0.00446681	10.4171	0.185662	0.164919	0.240326	7.42009	0.265176	1.12675	4.83	113.381	2.889	1.39458	1.44541	0.174274	22.2117	0.896194	3.18767	0.367658	1.88486	0.386029	4.05	2.07747	0.384307	0.92867	37.4962	0.762763	1.408	204.746	0.702	0.218692	0.958112	0.220996	1.09	205.361	2.04	11.0309	1.64861	97.8411
3	OP-N3	46.5027	16.3407	9.81855	<0.001	10.6143	4.06234	4.5672	0.213939	4.79064	0.790919	0.908254	3.1	252.937	52.371	3.98003	2.15224	2.30705	18.7868	6.17647	2.29189	0.767286	22.2689	0.2625	3.726	28.8713	6.61329	55.5686	15.4493	6.59027	1.04	2194.6	0.549	0.77757	1.99882	0.237367	1.54	397.794	0.84	18.811	1.65693	74.9348
4	OP-N4a	63.4949	16.549	0.308314	0.00314432	2.90122	3.08792	1.28602	0.0346394	6.65449	0.120263	0.314867	3.38	867.931	17.262	0.799139	0.452685	0.589212	18.867	1.23529	1.81576	0.175836	8.07564	<0.1	3.195	7.74113	2.02562	45.3437	7.07119	1.72384	<1	971.535	0.603	0.186293	0.561652	<0.1	1.23	84.3147	3.4	3.91096	0.366357	54.0593
5	OP-N4b	60.4015	15.8817	0.197529	0.00625397	5.50517	4.59899	1.48913	0.133789	4.79915	0.393591	0.455639	4.86	2345.99	41.04	2.29557	1.07215	1.59336	18.8069	3.31027	1.7512	0.431599	24.69	0.154412	3.249	19.0448	4.76381	70.7495	11.3458	4.40877	<1	971.343	0.558	0.421184	0.759882	0.122776	2.45	155.252	7.52	9.21749	1.1074	57.9483
6	OP-N4c	63.4929	16.0916	0.347109	0.00297447	2.63117	2.76983	1.20908	0.697601	6.86847	0.117677	0.221811	3.48	1008.94	10.881	0.853982	0.444743	0.522822	17.505	1.03345	1.61401	0.167844	3.37975	<0.1	2.727	4.463	0.856685	41.6954	4.63231	1.15177	<1	957.992	0.531	0.194393	0.388201	<0.1	0.88	57.0592	1.52	3.9611	0.466273	46.9309
7	OP-N5	49.5422	14.4828	1.76581	0.0148852	6.59616	3.79275	3.67768	0.1334	4.42962	0.324623	0.468013	4.24	423.753	20.547	1.95867	0.968904	0.871369	16.113	2.36563	1.53331	0.335688	9.58678	0.162132	2.268	10.8929	2.76221	49.9113	15.4822	2.75357	<1	724.025	0.387	0.364486	0.908555	0.155516	0.92	172.274	<0.5	9.63532	0.857609	48.9535
8	OP-N6	39.6069	6.20584	16.4645	0.0137944	22.2211	0.428103	11.1743	0.223836	0.822553	0.132898	1.35135	1.74	26.7576	16.722	2.63246	1.32629	1.54357	18.6066	4.00461	1.77541	0.575465	6.06079	0.162132	1.053	14.1947	2.58607	13.0109	56.1336	3.98162	5.232	368.145	0.243	0.566978	0.280826	0.139146	0.24	576.888	<0.5	12.6688	1.02414	39.6791
9	OP-N7	46.6104	12.5554	10.0761	0.126923	8.71003	2.01975	11.9142	0.160041	2.10497	0.197039	0.612815	4.02	322.464	29.034	2.20155	1.35011	1.12863	16.9342	2.78547	1.66243	0.455576	14.7701	0.169853	3.222	16.5881	3.89912	29.8312	27.8643	3.75279	<1	1081.5	0.441	0.469782	1.81711	0.229181	0.91	229.537	<0.5	12.4683	1.1074	51.1816
10	OP-N8a	45.4719	12.4745	12.6313	0.0267686	10.8879	2.01866	7.48103	0.206746	2.67584	0.525473	0.760674	4.48	253.367	34.2	2.94585	1.4613	1.62656	14.0801	4.41638	1.62208	0.527509	14.9976	0.177574	2.277	20.3244	4.7558	40.7193	32.2223	5.04949	<1	1558.23	0.342	0.607477	1.38761	0.220996	1.1	327.359	1.2	14.7162	1.32388	52.4067
11	OP-N8b	45.63	16.4288	6.63343	<0.001	9.46223	4.10925	4.37039	0.198545	3.42352	0.636768	0.854156	4.26	342.099	42.219	3.36892	1.86633	1.81743	21.9614	4.78777	1.98523	0.671375	19.4173	0.216176	4.005	22.86	5.29223	78.8517	13.4355	5.82751	<1	1364.07	0.531	0.615576	1.99056	0.245552	1.4	352.998	17.23	17.7246	1.70689	65.1671
Rep 11		47.7101	17.4573	6.67525	<0.001	9.54341	4.2575	4.59481	0.197855	3.56238	0.644981	0.883631	4.22	358.613	44.352	3.85467	1.88221	2.0083	22.9328	5.05421	1.6705	0.663383	20.246	0.2625	4.392	24.2503	5.59648	81.5903	13.9219	5.42324	1.088	1393.89	0.513	0.615576	1.90796	0.253737	1.6	364.639	<0.5	18.1508	1.54869	66.9184
12	OP-NA1	48.5219	16.3096	5.40128	0.00219608	7.17056	3.86786	3.11613	0.165305	4.04497	0.325525	0.645355	1.8	275.918	29.511	2.40525	1.23098	1.12033	18.2961	3.31834	1.69471	0.551487	13.6815	0.247059	3.807	14.953	3.56285	53.5975	14.0513	3.24937	<1	1389.98	0.387	0.469782	1.5941	0.212811	1.34	205.727	<0.5	16.0867	1.72354	66.6142
13	OP-NA2	52.8976	16.5299	0.0906368	0.00630141	9.3874	5.54597	1.12272	0.0058041	0.317642	0.197534	0.617569	11.22	301.662	41.868	2.00568	1.03244	0.904564	20.5794	2.68051	1.68664	0.391636	20.4572	0.162132	3.366	17.2833	4.55564	75.8003	11.6477	3.34853	3.096	120.72	0.432	0.396885	2.08968	0.163701	2.18	275.533	<0.5	9.51833	1.1074	63.6872
14	OP-NA3a	48.3244	17.4401	2.29018	<0.001	6.40492	2.95501	4.1436	0.0907585	4.43283	0.390372	0.567401	6.18	338.062	37.386	2.24856	1.38188	1.41079	20.7396	3.4233	2.11435	0.479554	18.7998	0.185294	3.474	18.5945	4.41153	28.8077	9.58701	3.66126	<1	1139.47	0.468	0.429283	2.16401	0.180071	1.94	237.623	0.75	13.0783	1.04911	64.8054
15	OP-NA3b	50.261	18.5611	2.09431	<0.001	6.35849	3.77639	2.82872	0.0669946	4.32844	0.425209	0.592731	5.15	433.889	32.949	2.3034	1.31834	1.41079	22.2117	3.39908	2.21926	0.527509	15.8994	0.177574	3.645	15.8693	3.86709	41.7333	10.017	3.53922	<1	1240.53	0.45	0.52648	2.50265	0.196441	2.16	264.748	0.57	12.1841	1.31556	67.1322
16	OP-NA4	52.8525	18.3756	4.87164	<0.001	7.14619	3.80991	3.25429	0.167862	4.84746	0.426295	0.604148	2.32	450.735	40.41	2.67163	1.39776	1.36929	23.0529	3.21338	2.06593	0.471561	19.5473	0.185294	4.203	18.634	4.7558	52.1287	10.4592	3.89772	1.264	1729.61	0.927	0.485981	2.27965	0.188256	2.04	264.99	<0.5	13.68	1.2989	69.0479
17	OP-NA5	55.6244	19.5414	4.44715	0.00573585	7.57787	3.90937	3.5531	0.132266	5.00441	0.425644	0.641195	2.28	537.179	41.733	2.78132	1.51689	1.46888	23.6938	3.60092	2.08207	0.503532	20.7009	0.223897	4.185	19.3923	4.7478	57.1511	11.3726	4.12655	1.296	1842.78	0.468	0.542679	2.61003	0.204626	1.91	283.772	1.04	14.4488	1.15736	73.8248
18	OP-NA6	54.0498	15.1533	0.968838	0.00722889	8.67853	2.02484	2.75509	0.0666352	0.207451	0.190761	0.886133	14.45	256.677	13.158	3.91735	2.37461	1.07054	15.0215	3.77047	2.074	0.775279	8.75809	0.347426	3.375	12.7729	2.7462	44.4624	22.2959	3.2036	<1	267.987	0.468	0.664174	0.751622	0.343772	1.87	198.075	1.11	21.9364	2.36467	76.8752
19	OP-BA1	47.3735	17.2785	9.63176	0.00493133	9.10486	1.79972	4.37932	0.15793	3.52111	0.474904	0.909545	3.48	375.674	35.631	3.87817	2.16018	1.49378	20.5494	4.83622	2.41294	0.791264	16.2325	0.324265	5.031	18.3022	4.45957	39.4021	18.4484	4.65285	1.464	1703.16	0.54	0.623676	1.75929	0.311032	1.65	288.788	<0.5	20.9838	2.16484	75.1239
20	OP-BA2	48.4698	16.8205	1.40342	0.00357814	10.2147	5.41959	2.60526	0.124623	1.12483	0.59733	0.855267	11.45	320.679	28.881	3.88601	1.96957	1.51037	19.3476	4.35986	2.05786	0.695353	13.6083	0.285662	4.014	16.9041	3.93915	58.5915	21.3237	3.94348	1.168	387.127	0.351	0.704673	1.54454	0.253737	1.13	325.225	1.6	19.2874	1.86509	64.534
21	OP-BA3	52.0558	17.8276	3.42193	0.00333686	9.64824	3.72403	1.72727	0.202866	4.28487	0.36463	0.889323	3.9	329.64	29.115	3.2514	1.8028	1.42739	21.3205	4.30334	2.38873	0.679368	12.6659	0.270221	4.464	14.6055	3.69095	52.5267	23.5576	3.62312	1.2	1153.23	0.45	0.591277	1.18112	0.261922	0.51	213.123	<0.5	16.5881	1.75685	83.4034
Rep 21		53.0978	17.9957	3.30809	0.00315974	9.20525	3.62387	1.78353	0.196569	4.11279	0.372589	0.907802	4.11	336.636	29.826	3.26707	1.87427	1.50207	22.0014	3.67359	2.54206	0.65539	13.0478	0.285662	4.446	16.0194	3.70697	53.9008	22.2216	3.81381	1.4	1125.67	0.432	0.558879	1.33805	0.294662	0.61	219.346	<0.5	17.2149	1.80681	94.8566
22	OP-Ol1	44.501	14.4422	12.276	0.00228412	12.4135	1.29813	6.35453	0.217561	2.84312	0.765179	0.941553	4.72	231.687	49.968	3.2514	1.73926	2	18.9971	5.13495	2.09821	0.631413	21.099	0.193015	3.069	26.9439	6.42114	272.621	28.5747	5.65207	1.88	2094.45	0.342	0.672274	1.65192	0.204626	1.19	382.933	<0.5	17.1564	1.21564	68.6697
Standards
Standard SY-4		50.3697	20.8465	7.90275	0.00111957	6.20265	1.68681	0.542977	0.106419	6.96366	0.136129	0.302948		328.922	132.03	17.3852	14.2159	1.90041	34.6595	13.8224	9.95843	4.15613	56.3264	1.99191	13.896	54.9225	14.4516	55.1611	<1	12.5093	8.768	1226.28	1.08	2.5919	1.18112	2.21815	0.94	11.0305	1.14	114.98	14.4878	500.807
In-house Standard ICP-4		23.5162	9.69043	21.2956	0.184805	7.30203	0.668804	4.57799	0.270949	0.392661	0.277777	1.03919	4.68	817.295	222.606	3.4551	1.81074	1.04564	22.8226	5.3045	12.1454	0.639405	127.025	0.270221	184.347	59.4724	19.0793	183.498	23.9141	6.2394	70.824	289.085	366.444	0.737072	20.0956	0.311032	81.44	236.163	207.94	38.0482	1.70689	446.156
Blank		<0.01	0.0249027	<0.01	<0.001	0.0279966	<0.01	0.0204422	<0.001	<0.01	<0.01	<0.01		<0.5	<0.5	<0.1	<0.1	<0.1	<0.5	<0.1	<1	<0.1	<0.5	<0.1	1.037	<0.5	<0.1	<0.5	<1	<0.1	<1	<0.5	3.519	<0.1	<0.1	<0.1	0.11	<5	<0.5	<0.5	<0.1	<1
Recommended Value Standard SY-4		49.9	20.69	8.05		6.21	1.66	0.54	0.108	7.1	0.131	0.287	4.56	340	122	18.2	14.2	2	35	14	10.6	4.3	58	2.1	13	57	15	55	1.1	12.7	7.1	1191	0.9	2.6	1.4	2.3	0.8	8		119	14.8	517
Assigned Values for In-house Standard ICP-4		24.6	10.14	21.76	0.2171	7.51	0.76	4.53	0.27	0.4	0.26	1.08		865.7	220.2	3.8	2.1	1.1	25.1	6.1	12	0.7	133.4	0.3	206.4	61.5	22.5	194.6	28	7.7	83	294.2	540.6	0.7	21.8	0.3	84.6	201	178.5	41.7	2.1	481.9
