# Supplementary material for: The Petrology & Geochemistry of REE-Enriched, Alkaline Vol-Canic Rocks of Ambitle Island, Feni Island Group, Papua New Guinea
Source: Preprints.org preprint supplement (doi:10.20944/preprints202306.0971.v1), 2023-06-14
Supplement: Supplementary file 7 [file 10110111_Au Analyses.xls]

## Sheet: RESULTS FORM
						CERTIFICATE OF ANALYSIS
CLIENT:	MSSP-GEOMAP										SAMPLES RECEIVED:				2010-11-24
											ANALYSIS INSTRUCTIONS RECEIVED:				2010-11-24
ADDRESS:	PO Box 594,										DATE OF REPORT:				2010-12-22
	Konedobu, N.C.D.										STATUS OF REPORT:				FINAL
	Papua New Guinea										ANALYSIS COMPLETE:				2010-12-22
											PREPARATION CODE:				P1
INVOICE:	Same										ANALYSIS CODE:				Au1
P.O. NO.:	None
ATTN:	Dr. Friedrich-Karl Bandelow
CLIENT REF.:	OP-N1 to OP Ol 1
LAB. BATCH NO.:	10110111
NO. SAMPLES:	22
SAMPLE TYPE:	Prepared
Disclaimer: The results contained in this Certificate of Analysis relate only to the items tested / analysed
Notes/Comments:
Au analysis weight is 25gm except where indicated otherwise in brackets.
														Approved Signatories
													[ ]	Timothy Elliott, Managing Director
													[ ]	Andrey Tairov, Technical Manager
													[ ]	Svetlana Tairov, Senior Spectroscopist
													[ ]	Pat Gilchreest, Senior Chemist
			Au1
			Wet Geochem
LAB NO.	SAMPLE NO.		Auppb
1	OP-N1		-2
Rep 1			2
2	OP-N2		-8	6
3	OP-N3		5
4	OP-N4a		9
5	OP-N4b		49
6	OP-N4c		5
7	OP-N5		10
8	OP-N6		-2
9	OP-N7		-2
10	OP-N8a		6
11	OP-N8b		5
Rep 11			5	19
12	OP-NA1		10
13	OP-NA2		7
14	OP-NA3a		13
15	OP-NA3b		6
16	OP-NA4		9
17	OP-NA5		12
18	OP-NA6		8	24
19	OP-BA1		-2
20	OP-BA2		2
21	OP-BA3		-2
Rep 21			-2
22	OP-Ol1		-2
Standards
SY-4
Blank
Standard GLG305-3			55
Blank			-2
Recommended Value Standard GLG305-3			55.48
