# Supplementary material for: The Petrology & Geochemistry of REE-Enriched, Alkaline Vol-Canic Rocks of Ambitle Island, Feni Island Group, Papua New Guinea
Source: Preprints.org preprint supplement (doi:10.20944/preprints202306.0971.v1), 2023-06-14
Supplement: Supplementary file 8 [file Olive3871_xrf_feni 2 rocks.xls]

## Sheet: Olive's results 3871
X.R.F. Results for Gawen Jenkin Sept 2009 Job 3755
Bead	Pellet	Sample	SiO2	TiO2	Al2O3	Fe2O3	MnO	MgO	CaO	Na2O	K2O	P2O5	SO3	LOI	Total		Rb	Sr	Y	Zr	Nb	Mo	Pb	Th	U	Ga	Zn	Cu	Ni	Co	Cr	V	Sc	Ba	La	Ce	Nd	Cs	As	Sb	Se	Sn	W	Ag	Cd	Au	Bi
LF32784	L49943	OP-N1	54.0892	0.921967	16.5403	10.5598	0.227281	4.93741	1.56011	3.53125	3.81765	0.472182	0.0506534	3.17445	99.8822		45.4448	935.782	21.463	78.1328	8.13542	1.19043	6.75945	1.60301	1.32975	21.4646	101.952	118.928	23.2827	31.2993	56.526	290.26	32.7416	598.009	17.6997	31.0752	21.4247	<1.7	6.31628	<0.9	<0.5	1.10046	<1.2	<0.5	<1.0	<0.7	<0.9
LF32785	L49944	OP-N2	57.8709	1.08267	18.2477	10.6011	0.244093	<0.03	0.379425	7.94119	0.153704	0.264875	<0.002	3.45143	100.237		2.28252	211.006	13.786	130.229	3.29963	3.62623	10.724	1.29531	1.18357	23.8437	45.1606	72.7386	<0.7	11.7305	19.155	216.745	41.3657	124.543	3.65312	<6.9	<2.4	<1.6	104.16	<0.9	1.90891	<0.8	<1.1	1.73896	1.02965	1.55827	<0.9
LF32786	L49945	OP-N3	46.3359	0.86311	16.7639	10.3181	0.213074	4.3168	9.67091	4.80614	3.94747	0.807318	0.0641533	1.66218	99.7691		58.0308	2174.36	20.9233	60.0353	2.80969	1.88401	8.29027	1.14888	1.84344	20.8721	77.0856	238.103	6.04972	25.5645	1.07177	339.619	12.1866	307.026	25.3638	55.4993	32.8105	3.07754	11.1705	<1.0	<0.6	<0.9	1.54126	<0.6	<1.1	1.4012	<1.0
LF32787	L49946	OP-N4C	65.3649	0.228774	16.7491	2.81826	0.7395	1.0661	0.310821	7.04025	2.7608	0.100934	0.0287929	2.21995	99.4281		43.2993	954.288	4.82721	54.5575	2.51289	6.39758	29.4634	<0.4	0.691032	17.9825	45.4436	69.7495	18.3263	67.2657	14.8522	71.6591	5.21018	1316.39	5.63837	7.44113	6.49175	<1.6	26.6936	<0.8	0.650943	<0.7	<0.9	1.30738	<0.8	<0.5	<0.7
LF32788	L49947	OP-N6	41.0328	1.31527	6.31762	21.3537	0.225588	11.3012	16.7364	0.831566	0.401262	0.126205	0.00556273	0.498371	100.146		17.953	419.449	17.559	46.1991	0.931211	2.23996	1.806	0.782447	0.597726	18.4014	70.7821	63.0869	97.2856	96.593	95.8167	580.832	66.3863	48.521	9.0965	22.9503	17.8201	<2.0	<0.7	<1.2	0.859628	5.5674	<1.7	0.89622	1.83545	<0.9	<1.3
LF32789	L49948	OP-N5	57.7243	0.533541	16.9301	7.70119	0.152656	3.99119	1.96288	4.95678	4.03967	0.38226	0.00451258	1.82706	100.206		58.2887	794.497	12.6943	60.8526	2.61992	0.952056	8.40821	<0.5	1.69224	19.3609	56.6715	69.0331	51.8485	28.4185	134.643	223.303	20.908	484.486	12.3867	22.6069	16.02	<1.7	4.12117	<0.9	<0.5	1.1983	<1.0	<0.5	<0.9	1.20658	<0.8
LF32790	L49949	OP-N7	49.0952	0.597449	13.2365	8.69781	0.168191	11.7813	10.2932	2.17579	2.06304	0.209193	0.00743084	1.95879	100.284		28.4962	1049.42	13.8671	51.7262	3.29761	1.04665	8.95597	1.72127	2.27144	18.2197	62.7365	81.4165	318.135	44.0693	703.168	263.187	18.9911	474.795	22.0796	32.9939	21.9003	<1.8	6.20065	<1.0	<0.5	<0.9	<1.2	0.771834	<1.0	<0.7	<0.9
LF32791	L49950	OP-N8B	48.0551	0.847036	17.7286	10.0316	0.211223	4.25665	7.15249	3.79572	4.30704	0.666869	0.0893482	2.97282	100.115		88.6095	1458.16	20.6374	65.4138	4.33125	0.954656	9.81617	0.738549	1.52441	26.81	74.8995	241.584	5.55825	25.3396	<0.7	310.636	11.9529	432.811	23.5117	41.9927	25.3424	<1.8	10.9554	<1.0	1.08824	<0.9	<1.2	1.01481	1.13187	0.986756	<1.0
LF32792	L49951	OP-N8A	46.7412	0.743956	13.1557	11.0986	0.214617	7.3652	13.0088	2.79021	1.98425	0.548826	0.0624762	2.76815	100.482		40.9248	1579.67	17.6068	43.8624	1.87669	1.69873	6.72411	1.20816	1.36594	14.4269	81.8126	178.298	68.1562	42.0062	146.153	331.697	29.5542	346.33	20.1829	39.4683	23.4632	3.39037	3.4796	<1.0	0.62446	<1.0	<1.3	<0.6	<1.1	0.799451	<1.1
LF32793	L49952	OP-BA1	49.6965	0.897053	17.9962	9.04363	0.163263	4.45566	9.89663	3.61448	1.84158	0.494513	0.0220506	1.9611	100.083		37.4855	1668.26	24.448	73.3874	5.1414	0.919911	7.81236	0.850593	1.41973	22.2118	72.1065	124.304	17.1663	23.2162	17.2966	288.315	17.4376	460.517	22.6908	40.1547	22.7721	29.5052	5.93871	<1.0	0.680888	<0.9	<1.2	<0.6	<1.0	<0.7	<1.0
LF32794	L49953	OP-BA2	52.4913	0.911089	18.6449	10.9762	0.132882	2.71907	1.52048	1.1956	5.73145	0.65027	0.300918	4.70182	99.9759		65.917	432.933	24.9379	86.177	4.32521	1.95062	7.75465	1.25085	1.71306	21.7557	84.9587	122.909	21.8383	27.7231	17.7	430.202	33.2014	348.056	18.2268	29.8811	23.5165	<1.7	43.6786	0.998551	<0.5	<0.9	<1.2	0.566191	1.54771	<0.6	<0.9
LF32795	L49954	OP-BA3	54.6033	0.889037	19.0813	9.64696	0.209041	1.70901	3.5529	4.44126	3.69738	0.393343	0.0338337	1.70635	99.9638		56.9416	1148.56	19.7069	90.5836	4.30407	0.912908	4.74064	<0.6	1.21689	24.7547	69.3813	99.8038	9.27071	28.5379	13.6938	241.585	33.8165	378.593	15.0131	31.8772	20.3026	<1.7	9.77749	<1.0	<0.5	<0.9	<1.2	1.21879	<1.0	1.46262	<0.9
LF32796	L49955	OP-NA1	54.1467	0.676984	18.2535	7.64441	0.179751	3.23552	5.91141	4.48107	4.16603	0.345542	0.0429333	1.00472	100.089		59.4077	1467.53	18.8488	75.0906	4.12922	0.473204	7.91747	0.659242	2.15922	20.6173	80.8277	116.385	19.2718	19.7515	14.8896	213.35	18.1146	323.57	15.3858	28.351	17.9404	<1.7	7.01955	<0.9	<0.5	<0.9	<1.1	1.04878	<1.0	<0.7	<0.9
LF32797	L49956	OP-NA2	55.9599	0.618244	17.9316	10.0122	0.00828972	1.16086	0.123289	0.341764	5.61517	0.200416	0.0808964	8.20379	100.256		92.3056	139.473	11.9261	87.5186	3.97325	3.66968	14.5277	2.57347	2.01701	25.9491	11.1259	129.781	15.737	15.4912	30.9708	281.664	14.7972	323.292	21.9827	38.6573	19.5683	<1.5	39.7608	<1.0	8.11507	<0.9	<1.2	0.587128	<1.0	<0.7	<0.9
LF32798	L49957	OP-NA3A	55.0951	0.606062	20.0505	6.77662	0.0751167	2.69184	2.29753	4.65796	3.70928	0.461564	0.127529	4.02347	100.573		43.0346	1256.66	14.4756	76.6306	4.30459	1.16029	11.1017	1.6209	2.17201	25.3174	69.7863	199.923	8.14855	15.389	63.5692	313.725	13.5032	463.628	19.7425	34.5532	19.855	<1.6	72.2283	<0.9	2.00678	<0.8	<1.0	0.772803	1.58807	<0.6	<0.9
LF32799	L49959	OP-NA3B	54.2104	0.590599	19.1428	7.02899	0.105008	4.36979	2.5847	4.93377	3.13715	0.425978	0.222221	3.07192	99.8233		43.7466	1089.32	16.2898	80.5745	4.16923	1.28849	11.577	1.9328	2.73945	27.577	52.7014	333.563	5.71167	12.8452	2.50252	274.382	16.6368	398.055	18.762	36.7923	22.6698	<1.6	55.6138	<0.9	2.81818	1.55822	<1.1	1.11642	0.982223	<0.6	<0.9
LF32800	L49961	OP-NA5	54.3583	0.599882	19.5474	7.35751	0.131968	3.20888	4.46002	4.92564	3.67387	0.424992	0.0832131	1.08743	99.8591		29.9827	1181.99	16.082	76.3614	3.92759	1.04703	8.39576	1.65565	1.85131	24.8079	118.167	181.776	28.1968	15.0486	30.4637	337.505	15.1128	378.657	22.6474	43.571	21.5844	<1.8	98.2989	<0.9	1.16816	<0.8	<1.0	0.706923	<0.9	<0.6	<0.9
LF32801	L49962	OP-NA6	59.0861	0.93059	17.0739	9.58875	0.0766244	2.71396	1.07879	0.218237	2.22509	0.203323	<0.002	6.85387	100.049		53.3768	1721.84	15.3311	69.512	4.08997	1.25617	14.8018	1.23586	1.65012	24.5892	111.369	136.634	7.16347	14.6438	<0.6	219.799	10.9719	411.134	16.7737	29.0572	17.9191	<1.5	21.7801	<0.9	0.593611	<0.8	<1.1	<0.5	<1.0	<0.6	<0.9
LF32802	L49963	OP-OL1	45.7169	0.91677	15.3477	12.3971	0.223796	6.31525	12.6062	2.96624	1.21585	0.795618	0.0130121	2.16838	100.683		54.337	1769.21	15.1224	68.4664	4.03327	1.12656	12.9166	1.57809	1.91014	25.0203	85.2711	131.029	10.1141	18.3688	14.2501	296.594	16.6949	610.404	23.4171	45.4237	23.4267	<1.9	22.2154	<0.9	<0.5	<0.9	<1.1	1.25404	1.3149	<0.6	<0.9
LF32803	L49997	OP-N4A	62.1251	0.289577	15.9857	2.84904	0.0371633	1.0954	0.304162	6.66229	2.9514	0.103523	0.0451874	2.38095	94.8295		50.168	269.115	27.5305	99.129	3.32008	1.57776	5.68892	0.693785	1.9127	16.1793	91.0575	57.3267	23.3535	18.8944	50.3593	228.937	27.1311	299.152	11.1744	15.3388	15.2196	<1.6	27.2802	<0.9	<0.4	<0.8	<1.0	0.958171	0.957006	<0.6	<0.8
LF32804	L49998	OP-N4B	61.0283	0.431011	16.657	5.79338	0.141531	1.33149	0.26428	5.10914	4.65669	0.400951	0.125488	3.34319	99.2824		320.98	2115.53	16.33	53.4013	2.3288	1.22113	7.82792	0.838866	1.40361	19.0107	87.1011	182.511	24.368	29.9114	4.67945	320.332	15.9022	235.427	22.6701	46.682	25.6267	25.3792	5.83929	<1.1	<0.6	<1.0	<1.4	<0.6	<1.2	<0.8	<1.1
LF32805	L49958	OP-NA3A	53.4083	0.586737	19.9457	6.92806	0.0693183	3.37624	1.69812	4.38929	3.82452	0.245703	0.165269	5.34208	99.9793		47.3774	939.057	4.02707	62.2416	2.80251	6.46664	43.8332	<0.4	1.35353	19.5392	25.3399	46.7394	7.66491	3.68806	19.3359	98.4022	9.46807	1016.1	11.5912	18.0746	11.2751	<1.6	42.7236	1.23228	1.72154	<0.7	<0.8	1.08834	<0.8	<0.5	<0.7
LF32806	L49960	OP-NA4	53.8105	0.587945	19.1	7.22053	0.171483	2.98316	4.99886	4.98876	3.78642	0.426502	0.279595	1.1844	99.5381		75.3822	962.755	10.8529	64.2018	2.91131	24.5787	159.504	0.900934	2.38904	21.3298	49.6049	279.92	7.46619	16.6639	38.7425	193.392	17.4765	2510.25	30.4954	45.6625	24.529	<1.8	113.716	1.47353	3.1317	<0.8	4.17522	1.35898	1.71063	<0.6	<0.8
Notes;
i)	Alumino-silicate rich samples - major elements determined on fused glass beads prepared from ignited powders
	sample to flux ratio 1:5, 80% Li metaborate: 20% Li tetraborate flux
	results quoted as component oxide weight percent, re-calculated to include LOI
ii)	Carbonate rich samples - major elements determined on fused glass beads prepared from dried powders
	sample to flux ratio 1:5, 100% Li tetraborate flux
	results quoted as component oxide weight percent, re-calculated to include LOI
iii)	Samples analysed on University of Leicester, Department of Geology
	PANalytical Axios Advanced XRF spectrometer
iv)	Trace elements analysed on 32mm diameter pressed powder briquettes
	7.5g sample mixed with 15-20 drops 7% PVA soln. as binding agent
	pressed at 10 tons per sq. inch
v)	Elements with concentrations below the lower limit of detection reported
	as <LLD
vi)	Ag, Au, Bi & Cd (highlighted in blue) calibrations dependant on in-house spiked samples
	due to lack of suitable international reference materials.

## Sheet: loi re-calc
X.R.F. Results for Gawen Jenkin Sept 2009 Job 3755																X.R.F. Results for Gawen Jenkin Sept 2009 Job 3755
																Re-calculated to include LOI
Bead	SiO2	TiO2	Al2O3	Fe2O3	MnO	MgO	CaO	Na2O	K2O	P2O5	SO3	Total	LOI			Bead	Sample	SiO2	TiO2	Al2O3	Fe2O3	MnO	MgO	CaO	Na2O	K2O	P2O5	SO3	LOI	Total
LF32784 LOP 3871	55.8647	0.952231	17.0832	10.9064	0.234741	5.09948	1.61132	3.64717	3.94296	0.487682	0.0523161	99.8822	3.17445	0.968218		LF32784	OP-N1	54.0892	0.921967	16.5403	10.5598	0.227281	4.93741	1.56011	3.53125	3.81765	0.472182	0.0506534	3.17445	99.8822
LF32785 LOP 3871	59.9347	1.12128	18.8984	10.9792	0.252798	-0.00532662	0.392956	8.22438	0.159185	0.274321	0.00161391	100.234	3.45143	0.965566		LF32785	OP-N2	57.8709	1.08267	18.2477	10.6011	0.244093	<0.03	0.379425	7.94119	0.153704	0.264875	<0.002	3.45143	100.237
LF32786 LOP 3871	47.121	0.877733	17.0479	10.4929	0.216684	4.38994	9.83476	4.88757	4.01435	0.820996	0.0652402	99.7691	1.66218	0.98334		LF32786	OP-N3	46.3359	0.86311	16.7639	10.3181	0.213074	4.3168	9.67091	4.80614	3.94747	0.807318	0.0641533	1.66218	99.7691
LF32787 LOP 3871	66.8576	0.233999	17.1316	2.88262	0.756388	1.09045	0.317919	7.20103	2.82384	0.103239	0.0294504	99.4281	2.21995	0.977673		LF32787	OP-N4C	65.3649	0.228774	16.7491	2.81826	0.7395	1.0661	0.310821	7.04025	2.7608	0.100934	0.0287929	2.21995	99.4281
LF32788 LOP 3871	41.238	1.32185	6.34922	21.4605	0.226716	11.3578	16.8201	0.835725	0.403268	0.126837	0.00559055	100.146	0.498371	0.995024		LF32788	OP-N6	41.0328	1.31527	6.31762	21.3537	0.225588	11.3012	16.7364	0.831566	0.401262	0.126205	0.00556273	0.498371	100.146
LF32789 LOP 3871	58.7963	0.54345	17.2445	7.84421	0.155491	4.06531	1.99934	5.04883	4.11469	0.389359	0.00459639	100.206	1.82706	0.981767		LF32789	OP-N5	57.7243	0.533541	16.9301	7.70119	0.152656	3.99119	1.96288	4.95678	4.03967	0.38226	0.00451258	1.82706	100.206
LF32790 LOP 3871	50.0733	0.609351	13.5002	8.87109	0.171542	12.016	10.4982	2.21913	2.10414	0.213361	0.00757887	100.284	1.95879	0.980468		LF32790	OP-N7	49.0952	0.597449	13.2365	8.69781	0.168191	11.7813	10.2932	2.17579	2.06304	0.209193	0.00743084	1.95879	100.284
LF32791 LOP 3871	49.5258	0.872958	18.2711	10.3386	0.217687	4.38692	7.37138	3.91188	4.43885	0.687277	0.0920826	100.115	2.97282	0.970306		LF32791	OP-N8B	48.0551	0.847036	17.7286	10.0316	0.211223	4.25665	7.15249	3.79572	4.30704	0.666869	0.0893482	2.97282	100.115
LF32792 LOP 3871	48.0654	0.765032	13.5284	11.413	0.220697	7.57385	13.3773	2.86925	2.04046	0.564374	0.064246	100.482	2.76815	0.972451		LF32792	OP-N8A	46.7412	0.743956	13.1557	11.0986	0.214617	7.3652	13.0088	2.79021	1.98425	0.548826	0.0624762	2.76815	100.482
LF32793 LOP 3871	50.6898	0.914982	18.3559	9.22438	0.166526	4.54471	10.0944	3.68672	1.87838	0.504397	0.0224913	100.083	1.9611	0.980405		LF32793	OP-BA1	49.6965	0.897053	17.9962	9.04363	0.163263	4.45566	9.89663	3.61448	1.84158	0.494513	0.0220506	1.9611	100.083
LF32794 LOP 3871	55.0818	0.956051	19.565	11.5179	0.13944	2.85326	1.59552	1.2546	6.0143	0.682361	0.315769	99.9759	4.70182	0.952971		LF32794	OP-BA2	52.4913	0.911089	18.6449	10.9762	0.132882	2.71907	1.52048	1.1956	5.73145	0.65027	0.300918	4.70182	99.9759
LF32795 LOP 3871	55.5515	0.904476	19.4127	9.81449	0.212672	1.73869	3.6146	4.51839	3.76159	0.400174	0.0344212	99.9638	1.70635	0.98293		LF32795	OP-BA3	54.6033	0.889037	19.0813	9.64696	0.209041	1.70901	3.5529	4.44126	3.69738	0.393343	0.0338337	1.70635	99.9638
LF32796 LOP 3871	54.6958	0.683849	18.4385	7.72192	0.181573	3.26833	5.97135	4.5265	4.20827	0.349046	0.0433687	100.089	1.00472	0.989962		LF32796	OP-NA1	54.1467	0.676984	18.2535	7.64441	0.179751	3.23552	5.91141	4.48107	4.16603	0.345542	0.0429333	1.00472	100.089
LF32797 LOP 3871	60.9471	0.673343	19.5297	10.9044	0.00902851	1.26432	0.134276	0.372222	6.1156	0.218277	0.0881059	100.256	8.20379	0.918172		LF32797	OP-NA2	55.9599	0.618244	17.9316	10.0122	0.00828972	1.16086	0.123289	0.341764	5.61517	0.200416	0.0808964	8.20379	100.256
LF32798 LOP 3871	57.3911	0.631319	20.8861	7.05902	0.0782471	2.80401	2.39328	4.85207	3.86385	0.480799	0.132843	100.573	4.02347	0.959994		LF32798	OP-NA3A	55.0951	0.606062	20.0505	6.77662	0.0751167	2.69184	2.29753	4.65796	3.70928	0.461564	0.127529	4.02347	100.573
LF32799 LOP 3871	55.9317	0.609351	19.7505	7.25216	0.108342	4.50853	2.66677	5.09042	3.23676	0.439503	0.229277	99.8233	3.07192	0.969226		LF32799	OP-NA3B	54.2104	0.590599	19.1428	7.02899	0.105008	4.36979	2.5847	4.93377	3.13715	0.425978	0.222221	3.07192	99.8233
LF32800 LOP 3871	54.9567	0.606486	19.7626	7.43851	0.133421	3.24421	4.50912	4.97986	3.71431	0.429671	0.0841293	99.8591	1.08743	0.98911		LF32800	OP-NA5	54.3583	0.599882	19.5474	7.35751	0.131968	3.20888	4.46002	4.92564	3.67387	0.424992	0.0832131	1.08743	99.8591
LF32801 LOP 3871	63.4316	0.999031	18.3296	10.294	0.0822597	2.91356	1.15813	0.234287	2.38874	0.218277	-0.0033569	100.046	6.85387	0.931493		LF32801	OP-NA6	59.0861	0.93059	17.0739	9.58875	0.0766244	2.71396	1.07879	0.218237	2.22509	0.203323	<0.002	6.85387	100.049
LF32802 LOP 3871	46.7231	0.936949	15.6855	12.6699	0.228722	6.45425	12.8836	3.03153	1.24261	0.81313	0.0132985	100.683	2.16838	0.978463		LF32802	OP-OL1	45.7169	0.91677	15.3477	12.3971	0.223796	6.31525	12.6062	2.96624	1.21585	0.795618	0.0130121	2.16838	100.683
LF32803 LOP 3871	63.7251	0.297035	16.3974	2.92241	0.0381204	1.12361	0.311995	6.83388	3.02741	0.106189	0.0463511	94.8295	2.38095	0.974892		LF32803	OP-N4A	62.1251	0.289577	15.9857	2.84904	0.0371633	1.0954	0.304162	6.66229	2.9514	0.103523	0.0451874	2.38095	94.8295
LF32804 LOP 3871	63.1549	0.44603	17.2375	5.99526	0.146462	1.37789	0.273489	5.28718	4.81896	0.414923	0.129861	99.2824	3.34319	0.966327		LF32804	OP-N4B	61.0283	0.431011	16.657	5.79338	0.141531	1.33149	0.26428	5.10914	4.65669	0.400951	0.125488	3.34319	99.2824
LF32805 LOP 3871	56.4231	0.619857	21.0716	7.31913	0.0732312	3.56682	1.79397	4.63706	4.0404	0.259572	0.174598	99.9793	5.34208	0.946568		LF32805	OP-NA3A	53.4083	0.586737	19.9457	6.92806	0.0693183	3.37624	1.69812	4.38929	3.82452	0.245703	0.165269	5.34208	99.9793
LF32806 LOP 3871	54.4585	0.595025	19.33	7.30748	0.173548	3.01909	5.05906	5.04883	3.83202	0.431638	0.282961	99.5381	1.1844	0.988101		LF32806	OP-NA4	53.8105	0.587945	19.1	7.22053	0.171483	2.98316	4.99886	4.98876	3.78642	0.426502	0.279595	1.1844	99.5381

## Sheet: AFUS sort
2010-03-19 11:57:51
PANalytical
Results quantitative - Fusion1109
Selected archive:	Fusion 0209
Number of results selected:	53
Seq.	Sample name (1-24)	Meas. date/time	Sum	Result type	SiO2	TiO2	Al2O3	Fe2O3	MnO	MgO	CaO	Na2O	K2O	P2O5	SO3		SiO2	TiO2	Al2O3	Fe2O3	MnO	MgO	CaO	Na2O	K2O	P2O5	SO3
			of conc.		Si1	Ti1	Al1	Fe1	Mn1	Mg1	Ca1	Na1	K1	P1	S1		Si1	Ti1	Al1	Fe1	Mn1	Mg1	Ca1	Na1	K1	P1	S1
			(%)		(%)	(%)	(%)	(%)	(%)	(%)	(%)	(%)	(%)	(%)	(%)		LLD (%)	LLD (%)	LLD (%)	LLD (%)	LLD (%)	LLD (%)	LLD (%)	LLD (%)	LLD (%)	LLD (%)	LLD (%)
21	LF32784 LOP 3871	2010-03-09 20:21:00	99.8822	Concentration	55.8647	0.952231	17.0832	10.9064	0.234741	5.09948	1.61132	3.64717	3.94296	0.487682	0.0523161		0.0071954	0.0018216	0.0046183	0.0012787	0.001	0.0297618	0.0011798	0.0069139	0.0013043	0.0009923	0.0019522
22	LF32785 LOP 3871	2010-03-09 20:28:00	100.234	Concentration	59.9347	1.12128	18.8984	10.9792	0.252798	-0.00532662	0.392956	8.22438	0.159185	0.274321	0.00161391		0.0073697	0.0017167	0.0048478	0.0012473	0.0009662	0.0273361	0.0011172	0.0083419	0.0009104	0.0008938	0.0019448
23	LF32786 LOP 3871	2010-03-09 20:36:00	99.7691	Concentration	47.121	0.877733	17.0479	10.4929	0.216684	4.38994	9.83476	4.88757	4.01435	0.820996	0.0652402		0.0068731	0.001868	0.004616	0.0013145	0.0010342	0.0291982	0.001324	0.0074096	0.0013109	0.0010766	0.0019388
24	LF32787 LOP 3871	2010-03-09 20:43:00	99.4281	Concentration	66.8576	0.233999	17.1316	2.88262	0.756388	1.09045	0.317919	7.20103	2.82384	0.103239	0.0294504		0.0076082	0.0017481	0.0045741	0.0011113	0.0009501	0.0272099	0.0011516	0.0079559	0.0011977	0.0008366	0.0019526
25	LF32788 LOP 3871	2010-03-09 20:50:00	100.146	Concentration	41.238	1.32185	6.34922	21.4605	0.226716	11.3578	16.8201	0.835725	0.403268	0.126837	0.00559055		0.0066234	0.0019359	0.0031128	0.0015533	0.0011367	0.0315134	0.0013816	0.0062214	0.0010327	0.0008119	0.0019075
26	LF32789 LOP 3871	2010-03-09 20:58:00	100.206	Concentration	58.7963	0.54345	17.2445	7.84421	0.155491	4.06531	1.99934	5.04883	4.11469	0.389359	0.00459639		0.0072935	0.0017678	0.0046446	0.0012146	0.0009853	0.0292243	0.0011878	0.0073365	0.0013006	0.0009556	0.001956
27	LF32790 LOP 3871	2010-03-09 21:05:00	100.284	Concentration	50.0733	0.609351	13.5002	8.87109	0.171542	12.016	10.4982	2.21913	2.10414	0.213361	0.00757887		0.0069655	0.0018535	0.0041704	0.0012759	0.0010392	0.0340299	0.0013148	0.006806	0.0011376	0.0008577	0.0019242
28	LF32791 LOP 3871	2010-03-09 21:12:00	100.115	Concentration	49.5258	0.872958	18.2711	10.3386	0.217687	4.38692	7.37138	3.91188	4.43885	0.687277	0.0920826		0.0069575	0.0018467	0.0047599	0.0013044	0.0010323	0.0293699	0.0012822	0.0069828	0.001334	0.0010396	0.0019417
29	LF32792 LOP 3871	2010-03-09 21:20:00	100.482	Concentration	48.0654	0.765032	13.5284	11.413	0.220697	7.57385	13.3773	2.86925	2.04046	0.564374	0.064246		0.0068357	0.0018792	0.0041638	0.0013531	0.0010589	0.0304849	0.0013507	0.0067782	0.0011455	0.0009912	0.0019338
30	LF32793 LOP 3871	2010-03-09 21:27:00	100.083	Concentration	50.6898	0.914982	18.3559	9.22438	0.166526	4.54471	10.0944	3.68672	1.87838	0.504397	0.0224913		0.0070005	0.0018807	0.0047811	0.0012919	0.0010305	0.029522	0.0013016	0.0069115	0.001106	0.0009775	0.0019303
31	LF32794 LOP 3871	2010-03-09 21:34:00	99.9759	Concentration	55.0818	0.956051	19.565	11.5179	0.13944	2.85326	1.59552	1.2546	6.0143	0.682361	0.315769		0.0071793	0.0018027	0.0048931	0.0013007	0.0010101	0.0278668	0.0012021	0.0056737	0.0014341	0.0010557	0.0019797
32	LF32795 LOP 3871	2010-03-09 21:42:00	99.9638	Concentration	55.5515	0.904476	19.4127	9.81449	0.212672	1.73869	3.6146	4.51839	3.76159	0.400174	0.0344212		0.0072074	0.0018024	0.0048486	0.001271	0.0010037	0.0276247	0.0012089	0.0070512	0.001259	0.0009404	0.0019597
33	LF32796 LOP 3871	2010-03-09 21:49:00	100.089	Concentration	54.6958	0.683849	18.4385	7.72192	0.181573	3.26833	5.97135	4.5265	4.20827	0.349046	0.0433687		0.0071544	0.0018014	0.0047451	0.0012465	0.0010094	0.0284796	0.0012561	0.0071777	0.0013164	0.0009213	0.0019471
34	LF32797 LOP 3871	2010-03-09 21:56:00	100.256	Concentration	60.9471	0.673343	19.5297	10.9044	0.00902851	1.26432	0.134276	0.372222	6.1156	0.218277	0.0881059		0.0073833	0.0017829	0.0048536	0.0012779	0.0009936	0.0260877	0.0011758	0.0051186	0.0014734	0.0008733	0.0019641
35	LF32798 LOP 3871	2010-03-09 22:04:00	100.573	Concentration	57.3911	0.631319	20.8861	7.05902	0.0782471	2.80401	2.39328	4.85207	3.86385	0.480799	0.132843		0.0072944	0.0017823	0.0050153	0.0012008	0.0009719	0.0290824	0.001189	0.0072672	0.001308	0.000989	0.0019547
36	LF32799 LOP 3871	2010-03-09 22:11:00	99.8233	Concentration	55.9317	0.609351	19.7505	7.25216	0.108342	4.50853	2.66677	5.09042	3.23676	0.439503	0.229277		0.0072584	0.0017691	0.0049245	0.0012025	0.0009772	0.0305125	0.0011869	0.0074294	0.0012466	0.0009521	0.0019539
37	LF32800 LOP 3871	2010-03-09 22:18:00	99.8591	Concentration	54.9567	0.606486	19.7626	7.43851	0.133421	3.24421	4.50912	4.97986	3.71431	0.429671	0.0841293		0.007203	0.0017936	0.0049112	0.0012194	0.0009908	0.0292349	0.0012177	0.007385	0.0012701	0.0009377	0.0019567
38	LF32801 LOP 3871	2010-03-09 22:25:00	100.046	Concentration	63.4316	0.999031	18.3296	10.294	0.0822597	2.91356	1.15813	0.234287	2.38874	0.218277	-0.0033569		0.0074543	0.0017409	0.0047517	0.0012537	0.000978	0.0274676	0.0011562	0.0051566	0.001154	0.0008796	0.0019715
39	LF32802 LOP 3871	2010-03-09 22:33:00	100.683	Concentration	46.7231	0.936949	15.6855	12.6699	0.228722	6.45425	12.8836	3.03153	1.24261	0.81313	0.0132985		0.0068766	0.0018631	0.0044672	0.0013694	0.0010604	0.0303228	0.0013349	0.0068326	0.001093	0.0010992	0.0019317
40	LF32803 LOP 3871	2010-03-09 22:40:00	94.8295	Concentration	63.7251	0.297035	16.3974	2.92241	0.0381204	1.12361	0.311995	6.83388	3.02741	0.106189	0.0463511		0.0074563	0.0017749	0.0044932	0.0011036	0.0009361	0.0265577	0.0011434	0.0077972	0.0012331	0.0008336	0.0019708
41	LF32804 LOP 3871	2010-03-09 22:47:00	99.2824	Concentration	63.1549	0.44603	17.2375	5.99526	0.146462	1.37789	0.273489	5.28718	4.81896	0.414923	0.129861		0.0074674	0.0018885	0.0046145	0.0011714	0.000969	0.027061	0.0011698	0.0073549	0.0013534	0.0009641	0.0019742
42	LF32805 LOP 3871	2010-03-09 22:55:00	99.9793	Concentration	56.4231	0.619857	21.0716	7.31913	0.0732312	3.56682	1.79397	4.63706	4.0404	0.259572	0.174598		0.0071975	0.0017525	0.0050531	0.0012029	0.0009722	0.0299048	0.0011741	0.0071617	0.0012999	0.0008783	0.0019683
43	LF32806 LOP 3871	2010-03-09 23:02:00	99.5381	Concentration	54.4585	0.595025	19.33	7.30748	0.173548	3.01909	5.05906	5.04883	3.83202	0.431638	0.282961		0.0071163	0.0017841	0.0048548	0.0012282	0.0009969	0.0289086	0.001235	0.0073433	0.0013009	0.0009712	0.001955
Run repeat
21	LF32784 LOP 3871	2010-03-10 14:59:00	99.7976	Concentration	55.7938	0.9465	17.1023	10.8986	0.233738	5.10049	1.60539	3.62891	3.94489	0.490631	0.0523161
22	LF32785 LOP 3871	2010-03-10 15:06:00	100.229	Concentration	59.9554	1.11364	18.8903	10.9743	0.252798	-0.00361808	0.392956	8.21728	0.159185	0.277271	-0.000374414
23	LF32786 LOP 3871	2010-03-10 15:14:00	99.7895	Concentration	47.1446	0.873913	17.0439	10.4871	0.216684	4.37587	9.8318	4.89771	4.03172	0.820996	0.0652402
24	LF32787 LOP 3871	2010-03-10 15:21:00	99.5067	Concentration	66.9591	0.232088	17.1437	2.88165	0.755385	1.05025	0.319894	7.19088	2.84314	0.103239	0.0274621
25	LF32788 LOP 3871	2010-03-10 15:28:00	100.167	Concentration	41.2498	1.31708	6.35325	21.4682	0.228722	11.3608	16.8152	0.833696	0.406163	0.12782	0.00658471
26	LF32789 LOP 3871	2010-03-10 15:36:00	100.114	Concentration	58.7845	0.544405	17.2496	7.84519	0.156494	3.97687	1.99934	5.04478	4.11662	0.389359	0.00658471
27	LF32790 LOP 3871	2010-03-10 15:43:00	100.32	Concentration	50.1176	0.605531	13.5223	8.8575	0.172545	12.0231	10.4894	2.20899	2.10414	0.212377	0.00658471
28	LF32791 LOP 3871	2010-03-10 15:51:00	100.161	Concentration	49.5051	0.872958	18.3175	10.3405	0.216684	4.39798	7.36941	3.92	4.43981	0.689244	0.0920826
29	LF32792 LOP 3871	2010-03-10 15:58:00	100.374	Concentration	48.0378	0.765032	13.5355	11.414	0.222703	7.4854	13.3496	2.88447	2.04625	0.567323	0.0662344
30	LF32793 LOP 3871	2010-03-10 16:05:00	100.158	Concentration	50.7892	0.914982	18.3478	9.22438	0.167529	4.52963	10.0757	3.70802	1.8697	0.506363	0.0244796
31	LF32794 LOP 3871	2010-03-10 16:13:00	99.9863	Concentration	55.0621	0.955096	19.564	11.5179	0.138437	2.8824	1.59848	1.23432	6.03552	0.684327	0.31378
32	LF32795 LOP 3871	2010-03-10 16:20:00	99.9695	Concentration	55.6057	0.907341	19.4077	9.8077	0.210665	1.75075	3.60177	4.49811	3.74615	0.397225	0.0364095
33	LF32796 LOP 3871	2010-03-10 16:27:00	100.102	Concentration	54.7302	0.682894	18.4446	7.73551	0.181573	3.19999	5.98122	4.54375	4.21116	0.34708	0.0443628
34	LF32797 LOP 3871	2010-03-10 16:34:00	100.306	Concentration	61.0022	0.673343	19.5196	10.9074	0.00802534	1.27135	0.134276	0.377293	6.10595	0.217294	0.0891001
35	LF32798 LOP 3871	2010-03-10 16:42:00	100.662	Concentration	57.463	0.630363	20.9466	7.05902	0.0782471	2.76984	2.38242	4.88351	3.8407	0.477849	0.130855
36	LF32799 LOP 3871	2010-03-10 16:49:00	99.8347	Concentration	55.9553	0.609351	19.7374	7.25022	0.109345	4.51355	2.66381	5.08433	3.24255	0.440487	0.228283
37	LF32800 LOP 3871	2010-03-10 16:56:00	99.8711	Concentration	55.0168	0.605531	19.7223	7.42395	0.133421	3.2613	4.5032	4.98798	3.70081	0.429671	0.0861176
38	LF32801 LOP 3871	2010-03-10 17:04:00	100.17	Concentration	63.4651	1.00476	18.375	10.3027	0.0822597	2.92361	1.15715	0.243415	2.4061	0.213361	-0.0033569
39	LF32802 LOP 3871	2010-03-10 17:11:00	100.809	Concentration	46.7793	0.94268	15.6925	12.668	0.230729	6.49546	12.8797	3.03457	1.25322	0.820013	0.0132985
40	LF32803 LOP 3871	2010-03-10 17:18:00	94.9766	Concentration	63.796	0.30181	16.4327	2.92047	0.0371172	1.12864	0.315944	6.8572	3.03416	0.108155	0.0443628
41	LF32804 LOP 3871	2010-03-10 17:26:00	99.2965	Concentration	63.148	0.445075	17.2546	5.98556	0.147466	1.38693	0.273489	5.31659	4.79098	0.417872	0.129861
42	LF32805 LOP 3871	2010-03-10 17:33:00	99.8622	Concentration	56.3226	0.619857	21.0514	7.32107	0.0732312	3.57687	1.7999	4.63908	4.02593	0.257606	0.174598
43	LF32806 LOP 3871	2010-03-10 17:40:00	99.6432	Concentration	54.4732	0.595025	19.3734	7.30166	0.173548	3.02914	5.05018	5.09853	3.83587	0.429671	0.282961

## Sheet: afus278
2010-03-19 11:57:51
PANalytical
Results quantitative - Fusion1109
Selected archive:	Fusion 0209
Number of results selected:	53
Seq.	Sample name (1-24)	Meas. date/time	Sum	Result type	SiO2	TiO2	Al2O3	Fe2O3	MnO	MgO	CaO	Na2O	K2O	P2O5	SO3
			of conc.		Si1	Ti1	Al1	Fe1	Mn1	Mg1	Ca1	Na1	K1	P1	S1
			(%)		(%)	(%)	(%)	(%)	(%)	(%)	(%)	(%)	(%)	(%)	(%)
1	MAJMON	2010-03-09 17:54:00	326.369	Concentration	176.78	6.50809	34.8002	10.295	1.0566	19.8863	4.35515	56.3392	12.8705	3.31136	0.166645
2	LF32773 SAL 3866	2010-03-09 18:01:00	99.9001	Concentration	71.294	0.863407	12.9062	6.72514	0.125396	2.21105	1.21935	2.51732	1.6179	0.422789	-0.00236274
3	LF32774 SAL 3866	2010-03-09 18:08:00	99.5268	Concentration	74.3517	0.994255	12.3888	5.29645	0.0963041	1.37186	0.656572	2.40474	1.78673	0.172065	0.00733354
4	LF32775 SAL 3866	2010-03-09 18:15:00	99.7964	Concentration	71.1128	0.820428	14.5883	6.33399	0.0973073	1.69949	0.55389	2.49703	1.93723	0.160266	-0.00435106
5	LF32775 SAL 3866	2010-03-09 18:23:00	99.4475	Concentration	72.9001	0.770763	13.2349	6.08844	0.0932946	1.68442	0.575611	2.08221	1.87259	0.150434	-0.00534522
6	LF32777 SAL 3866	2010-03-09 18:31:00	99.7214	Concentration	72.4078	0.705816	11.8443	5.95838	0.0953009	1.67135	3.16734	2.24753	1.50792	0.109138	0.00658471
7	LF32778 SAL 3866	2010-03-09 18:38:00	99.7659	Concentration	79.7777	0.660927	9.4613	4.50348	0.0601901	1.20904	0.795785	2.04469	1.15481	0.0963565	0.00161391
8	LF32779 SAL 3866	2010-03-09 18:45:00	99.9974	Concentration	72.0995	0.670477	13.4185	6.61449	0.121383	1.92964	0.701989	2.34591	1.82339	0.0786583	0.193487
9	LF32780 SAL 3866	2010-03-09 18:53:00	99.7926	Concentration	71.9843	0.887284	14.0619	5.92247	0.0702217	1.61608	0.794798	2.25159	2.05879	0.141585	0.00360223
10	LF32781 SAL 3866	2010-03-09 19:00:00	99.5871	Concentration	66.7257	0.914982	17.6479	6.66108	0.0762407	1.74773	0.246832	2.54673	2.89717	0.104222	0.0185146
11	LF32782 SAL 3866	2010-03-09 19:07:00	99.6412	Concentration	75.9549	0.763122	11.7959	5.13048	0.0601901	1.25829	0.640775	2.1167	1.59378	0.3166	0.0105614
12	LF32783 SAL 3866	2010-03-09 19:14:00	99.9524	Concentration	79.9757	0.64278	9.95847	4.22881	0.0762407	1.18593	0.4986	1.78504	1.46836	0.117004	0.0155322
13	LF32767 MML 3869	2010-03-09 19:22:00	99.8352	Concentration	52.4308	0.282708	33.1246	3.2262	0.0581837	0.570852	-0.00394931	0.75053	9.34657	0.0383459	0.010316
14	LF32768 MML 3869	2010-03-09 19:29:00	99.8168	Concentration	53.8893	0.269337	32.1011	3.07965	0.0531679	0.500501	-0.00394931	0.983802	8.88638	0.0432621	0.0142927
15	LF32769 MML 3869	2010-03-09 19:36:00	99.6592	Concentration	50.8778	0.309451	34.4316	2.83506	0.0461457	0.585928	-0.00592396	0.809355	9.71221	0.047195	0.010316
16	LF32770 MML 3869	2010-03-09 19:44:00	99.9672	Concentration	51.4165	0.309451	34.3096	2.8535	0.0451425	0.572863	-0.00197465	0.843839	9.55881	0.0481782	0.0113102
17	LF32771 MML 3869	2010-03-09 19:51:00	99.7771	Concentration	48.4268	0.347655	36.9931	2.52253	0.0371172	0.582913	-0.00691129	0.543627	10.2698	0.0501447	0.010316
18	LF32772 MML 3869	2010-03-09 19:58:00	99.9506	Concentration	48.5449	0.331418	36.9477	2.90591	0.0441394	0.612058	-0.00592396	0.492915	10.0229	0.0432621	0.0113102
19	LF32815 MML 3874	2010-03-09 20:05:00	99.9143	Concentration	49.3328	0.688624	32.927	5.27509	0.0100317	0.6804	0.0138226	0.610566	10.3489	0.0137652	0.0132985
20	LF32814 SWL 3873	2010-03-09 20:14:00	99.5395	Concentration	22.1083	0.284343	11.59	0.683427	0.0295597	3.85088	60.0879	0.158703	0.266634	0.199808	0.279979
21	LF32784 LOP 3871	2010-03-09 20:21:00	99.8822	Concentration	55.8647	0.952231	17.0832	10.9064	0.234741	5.09948	1.61132	3.64717	3.94296	0.487682	0.0523161
22	LF32785 LOP 3871	2010-03-09 20:28:00	100.234	Concentration	59.9347	1.12128	18.8984	10.9792	0.252798	-0.00532662	0.392956	8.22438	0.159185	0.274321	0.00161391
23	LF32786 LOP 3871	2010-03-09 20:36:00	99.7691	Concentration	47.121	0.877733	17.0479	10.4929	0.216684	4.38994	9.83476	4.88757	4.01435	0.820996	0.0652402
24	LF32787 LOP 3871	2010-03-09 20:43:00	99.4281	Concentration	66.8576	0.233999	17.1316	2.88262	0.756388	1.09045	0.317919	7.20103	2.82384	0.103239	0.0294504
25	LF32788 LOP 3871	2010-03-09 20:50:00	100.146	Concentration	41.238	1.32185	6.34922	21.4605	0.226716	11.3578	16.8201	0.835725	0.403268	0.126837	0.00559055
26	LF32789 LOP 3871	2010-03-09 20:58:00	100.206	Concentration	58.7963	0.54345	17.2445	7.84421	0.155491	4.06531	1.99934	5.04883	4.11469	0.389359	0.00459639
27	LF32790 LOP 3871	2010-03-09 21:05:00	100.284	Concentration	50.0733	0.609351	13.5002	8.87109	0.171542	12.016	10.4982	2.21913	2.10414	0.213361	0.00757887
28	LF32791 LOP 3871	2010-03-09 21:12:00	100.115	Concentration	49.5258	0.872958	18.2711	10.3386	0.217687	4.38692	7.37138	3.91188	4.43885	0.687277	0.0920826
29	LF32792 LOP 3871	2010-03-09 21:20:00	100.482	Concentration	48.0654	0.765032	13.5284	11.413	0.220697	7.57385	13.3773	2.86925	2.04046	0.564374	0.064246
30	LF32793 LOP 3871	2010-03-09 21:27:00	100.083	Concentration	50.6898	0.914982	18.3559	9.22438	0.166526	4.54471	10.0944	3.68672	1.87838	0.504397	0.0224913
31	LF32794 LOP 3871	2010-03-09 21:34:00	99.9759	Concentration	55.0818	0.956051	19.565	11.5179	0.13944	2.85326	1.59552	1.2546	6.0143	0.682361	0.315769
32	LF32795 LOP 3871	2010-03-09 21:42:00	99.9638	Concentration	55.5515	0.904476	19.4127	9.81449	0.212672	1.73869	3.6146	4.51839	3.76159	0.400174	0.0344212
33	LF32796 LOP 3871	2010-03-09 21:49:00	100.089	Concentration	54.6958	0.683849	18.4385	7.72192	0.181573	3.26833	5.97135	4.5265	4.20827	0.349046	0.0433687
34	LF32797 LOP 3871	2010-03-09 21:56:00	100.256	Concentration	60.9471	0.673343	19.5297	10.9044	0.00902851	1.26432	0.134276	0.372222	6.1156	0.218277	0.0881059
35	LF32798 LOP 3871	2010-03-09 22:04:00	100.573	Concentration	57.3911	0.631319	20.8861	7.05902	0.0782471	2.80401	2.39328	4.85207	3.86385	0.480799	0.132843
36	LF32799 LOP 3871	2010-03-09 22:11:00	99.8233	Concentration	55.9317	0.609351	19.7505	7.25216	0.108342	4.50853	2.66677	5.09042	3.23676	0.439503	0.229277
37	LF32800 LOP 3871	2010-03-09 22:18:00	99.8591	Concentration	54.9567	0.606486	19.7626	7.43851	0.133421	3.24421	4.50912	4.97986	3.71431	0.429671	0.0841293
38	LF32801 LOP 3871	2010-03-09 22:25:00	100.046	Concentration	63.4316	0.999031	18.3296	10.294	0.0822597	2.91356	1.15813	0.234287	2.38874	0.218277	-0.0033569
39	LF32802 LOP 3871	2010-03-09 22:33:00	100.683	Concentration	46.7231	0.936949	15.6855	12.6699	0.228722	6.45425	12.8836	3.03153	1.24261	0.81313	0.0132985
40	LF32803 LOP 3871	2010-03-09 22:40:00	94.8295	Concentration	63.7251	0.297035	16.3974	2.92241	0.0381204	1.12361	0.311995	6.83388	3.02741	0.106189	0.0463511
41	LF32804 LOP 3871	2010-03-09 22:47:00	99.2824	Concentration	63.1549	0.44603	17.2375	5.99526	0.146462	1.37789	0.273489	5.28718	4.81896	0.414923	0.129861
42	LF32805 LOP 3871	2010-03-09 22:55:00	99.9793	Concentration	56.4231	0.619857	21.0716	7.31913	0.0732312	3.56682	1.79397	4.63706	4.0404	0.259572	0.174598
43	LF32806 LOP 3871	2010-03-09 23:02:00	99.5381	Concentration	54.4585	0.595025	19.33	7.30748	0.173548	3.01909	5.05906	5.04883	3.83202	0.431638	0.282961
44	BH-1	2010-03-09 23:09:00	99.9754	Concentration	68.0669	0.39541	14.6165	5.78562	0.137434	2.56884	3.65706	3.79119	0.840303	0.0698093	0.0463511
45	WS-1	2010-03-09 23:17:00	99.8982	Concentration	51.0098	2.45842	14.0003	13.4386	0.184583	5.27436	8.91062	2.93112	1.33715	0.299885	0.0533103
46	BCS375	2010-03-09 23:24:00	99.2348	Concentration	66.4361	0.367712	20.1257	0.115499	0.00501584	-0.00803955	0.847126	10.5084	0.757334	0.021631	0.0582811
47	BCS376	2010-03-09 23:32:00	99.4631	Concentration	66.7138	0.00477548	18.0896	0.098999	0.00501584	-0.00402009	0.477866	2.86824	11.1526	0.00983229	0.0463511
48	SiO2	2010-03-09 23:39:00	99.5156	Concentration	99.2111	0.00286529	0.122023	0.00776463	0.0030095	0.0261306	0.00789861	0.0720103	0.0135066	0.00393292	0.045357
49	Blank	2010-03-09 23:46:00	0.0981168	Concentration	-0.0137867	0.00286529	0.0272282	0.0135881	0.00401267	0.0376874	-0.00197465	0.0192704	0.00385903	-0.00196646	0.00733354
50	Al2O3	2010-03-09 23:54:00	100.539	Concentration	0.0177258	0.00573058	99.9034	0.00485289	0.0030095	-0.00331657	0.00987327	0.528413	0.0289427	0.00294969	0.0374037
51	MRG-1	2010-03-10 00:01:00	100.025	Concentration	39.2576	3.80797	8.62832	18.1323	0.176557	13.6884	15.2137	0.742416	0.189092	0.0609602	0.127872
52	JP-1	2010-03-10 00:09:00	99.0331	Concentration	43.2637	0.00477548	0.752306	8.50809	0.124393	45.7818	0.569687	-0.02637	0.0144714	0.00294969	0.0374037
53	BCS372/1	2010-03-10 00:16:00	99.9009	Concentration	20.103	0.262651	5.39119	3.41061	0.0722281	1.56984	65.208	0.134892	0.723568	0.0786583	2.94632
Run repeat
1	MAJMON	2010-03-10 12:33:00	324.508	Concentration	175.709	6.46123	34.6131	10.2085	1.05132	19.7226	4.33535	56.1457	12.8052	3.2889	0.167639
2	LF32773 SAL 3866	2010-03-10 12:40:00	99.8911	Concentration	71.2812	0.858631	12.9223	6.71737	0.125396	2.201	1.22725	2.50515	1.62947	0.426721	-0.0033569
3	LF32774 SAL 3866	2010-03-10 12:48:00	99.5202	Concentration	74.2995	0.99521	12.3969	5.29353	0.0973073	1.39899	0.652623	2.42299	1.78673	0.170099	0.00633938
4	LF32775 SAL 3866	2010-03-10 12:55:00	99.7715	Concentration	71.0921	0.823293	14.5883	6.32429	0.0973073	1.71055	0.551916	2.50413	1.92373	0.160266	-0.00435106
5	LF32775 SAL 3866	2010-03-10 13:02:00	99.4488	Concentration	72.9139	0.768852	13.2299	6.09814	0.0953009	1.66834	0.576599	2.07714	1.87549	0.150434	-0.00534522
6	LF32777 SAL 3866	2010-03-10 13:09:00	99.8214	Concentration	72.5318	0.708681	11.8604	5.9545	0.0953009	1.65326	3.15155	2.23739	1.51177	0.109138	0.00757887
7	LF32778 SAL 3866	2010-03-10 13:17:00	99.7201	Concentration	79.7305	0.659016	9.45828	4.4996	0.0611932	1.22211	0.793811	2.04671	1.14999	0.0963565	0.00260807
8	LF32779 SAL 3866	2010-03-10 13:24:00	100.095	Concentration	72.1537	0.674298	13.4326	6.60479	0.122386	1.94271	0.702976	2.36822	1.82146	0.0776751	0.194481
9	LF32780 SAL 3866	2010-03-10 13:31:00	99.7555	Concentration	71.9331	0.893015	14.0709	5.91665	0.0712249	1.61407	0.789861	2.26275	2.06265	0.137652	0.00360223
10	LF32781 SAL 3866	2010-03-10 13:39:00	99.5733	Concentration	66.706	0.915937	17.6459	6.65914	0.0762407	1.7809	0.249794	2.54267	2.87305	0.105206	0.0185146
11	LF32782 SAL 3866	2010-03-10 13:46:00	99.5589	Concentration	75.8997	0.765032	11.7999	5.1266	0.0601901	1.21206	0.641762	2.12582	1.59667	0.320533	0.0105614
12	LF32783 SAL 3866	2010-03-10 13:53:00	99.9157	Concentration	80.0151	0.645645	9.91511	4.22784	0.0762407	1.14372	0.496625	1.78403	1.47994	0.116021	0.0155322
13	LF32767 MML 3869	2010-03-10 14:01:00	99.8037	Concentration	52.4476	0.286529	33.1529	3.22426	0.0571805	0.520601	-0.00394931	0.747487	9.32148	0.0403124	0.00932186
14	LF32768 MML 3869	2010-03-10 14:08:00	99.9295	Concentration	54.0183	0.272202	32.1253	3.08159	0.0531679	0.492461	-0.00394931	0.97366	8.86033	0.0442453	0.0123043
15	LF32769 MML 3869	2010-03-10 14:15:00	99.6996	Concentration	50.9497	0.307541	34.4689	2.83603	0.0461457	0.531657	-0.00592396	0.808341	9.7016	0.0462118	0.00932186
16	LF32770 MML 3869	2010-03-10 14:23:00	99.9963	Concentration	51.4244	0.309451	34.2692	2.8535	0.0461457	0.584923	-0.00296198	0.84891	9.60416	0.0481782	0.010316
17	LF32771 MML 3869	2010-03-10 14:30:00	99.878	Concentration	48.4839	0.347655	37.0233	2.51768	0.0351109	0.596983	-0.00592396	0.553769	10.2631	0.0511279	0.0113102
18	LF32772 MML 3869	2010-03-10 14:37:00	100.003	Concentration	48.5883	0.329508	36.9497	2.90688	0.0441394	0.596983	-0.00493663	0.500015	10.0373	0.0432621	0.0123043
19	LF32815 MML 3874	2010-03-10 14:44:00	100.151	Concentration	49.3899	0.685759	33.0631	5.33236	0.0130412	0.67437	0.0108606	0.612594	10.3441	0.012782	0.0123043
20	LF32814 SWL 3873	2010-03-10 14:52:00	97.9378	Concentration	21.716	0.282708	11.3491	0.672611	0.0280887	3.79295	59.1981	0.155177	0.264343	0.196646	0.281967
21	LF32784 LOP 3871	2010-03-10 14:59:00	99.7976	Concentration	55.7938	0.9465	17.1023	10.8986	0.233738	5.10049	1.60539	3.62891	3.94489	0.490631	0.0523161
22	LF32785 LOP 3871	2010-03-10 15:06:00	100.229	Concentration	59.9554	1.11364	18.8903	10.9743	0.252798	-0.00361808	0.392956	8.21728	0.159185	0.277271	-0.000374414
23	LF32786 LOP 3871	2010-03-10 15:14:00	99.7895	Concentration	47.1446	0.873913	17.0439	10.4871	0.216684	4.37587	9.8318	4.89771	4.03172	0.820996	0.0652402
24	LF32787 LOP 3871	2010-03-10 15:21:00	99.5067	Concentration	66.9591	0.232088	17.1437	2.88165	0.755385	1.05025	0.319894	7.19088	2.84314	0.103239	0.0274621
25	LF32788 LOP 3871	2010-03-10 15:28:00	100.167	Concentration	41.2498	1.31708	6.35325	21.4682	0.228722	11.3608	16.8152	0.833696	0.406163	0.12782	0.00658471
26	LF32789 LOP 3871	2010-03-10 15:36:00	100.114	Concentration	58.7845	0.544405	17.2496	7.84519	0.156494	3.97687	1.99934	5.04478	4.11662	0.389359	0.00658471
27	LF32790 LOP 3871	2010-03-10 15:43:00	100.32	Concentration	50.1176	0.605531	13.5223	8.8575	0.172545	12.0231	10.4894	2.20899	2.10414	0.212377	0.00658471
28	LF32791 LOP 3871	2010-03-10 15:51:00	100.161	Concentration	49.5051	0.872958	18.3175	10.3405	0.216684	4.39798	7.36941	3.92	4.43981	0.689244	0.0920826
29	LF32792 LOP 3871	2010-03-10 15:58:00	100.374	Concentration	48.0378	0.765032	13.5355	11.414	0.222703	7.4854	13.3496	2.88447	2.04625	0.567323	0.0662344
30	LF32793 LOP 3871	2010-03-10 16:05:00	100.158	Concentration	50.7892	0.914982	18.3478	9.22438	0.167529	4.52963	10.0757	3.70802	1.8697	0.506363	0.0244796
31	LF32794 LOP 3871	2010-03-10 16:13:00	99.9863	Concentration	55.0621	0.955096	19.564	11.5179	0.138437	2.8824	1.59848	1.23432	6.03552	0.684327	0.31378
32	LF32795 LOP 3871	2010-03-10 16:20:00	99.9695	Concentration	55.6057	0.907341	19.4077	9.8077	0.210665	1.75075	3.60177	4.49811	3.74615	0.397225	0.0364095
33	LF32796 LOP 3871	2010-03-10 16:27:00	100.102	Concentration	54.7302	0.682894	18.4446	7.73551	0.181573	3.19999	5.98122	4.54375	4.21116	0.34708	0.0443628
34	LF32797 LOP 3871	2010-03-10 16:34:00	100.306	Concentration	61.0022	0.673343	19.5196	10.9074	0.00802534	1.27135	0.134276	0.377293	6.10595	0.217294	0.0891001
35	LF32798 LOP 3871	2010-03-10 16:42:00	100.662	Concentration	57.463	0.630363	20.9466	7.05902	0.0782471	2.76984	2.38242	4.88351	3.8407	0.477849	0.130855
36	LF32799 LOP 3871	2010-03-10 16:49:00	99.8347	Concentration	55.9553	0.609351	19.7374	7.25022	0.109345	4.51355	2.66381	5.08433	3.24255	0.440487	0.228283
37	LF32800 LOP 3871	2010-03-10 16:56:00	99.8711	Concentration	55.0168	0.605531	19.7223	7.42395	0.133421	3.2613	4.5032	4.98798	3.70081	0.429671	0.0861176
38	LF32801 LOP 3871	2010-03-10 17:04:00	100.17	Concentration	63.4651	1.00476	18.375	10.3027	0.0822597	2.92361	1.15715	0.243415	2.4061	0.213361	-0.0033569
39	LF32802 LOP 3871	2010-03-10 17:11:00	100.809	Concentration	46.7793	0.94268	15.6925	12.668	0.230729	6.49546	12.8797	3.03457	1.25322	0.820013	0.0132985
40	LF32803 LOP 3871	2010-03-10 17:18:00	94.9766	Concentration	63.796	0.30181	16.4327	2.92047	0.0371172	1.12864	0.315944	6.8572	3.03416	0.108155	0.0443628
41	LF32804 LOP 3871	2010-03-10 17:26:00	99.2965	Concentration	63.148	0.445075	17.2546	5.98556	0.147466	1.38693	0.273489	5.31659	4.79098	0.417872	0.129861
42	LF32805 LOP 3871	2010-03-10 17:33:00	99.8622	Concentration	56.3226	0.619857	21.0514	7.32107	0.0732312	3.57687	1.7999	4.63908	4.02593	0.257606	0.174598
43	LF32806 LOP 3871	2010-03-10 17:40:00	99.6432	Concentration	54.4732	0.595025	19.3734	7.30166	0.173548	3.02914	5.05018	5.09853	3.83587	0.429671	0.282961

## Sheet: afus278 llds
2010-03-19 11:58:21
PANalytical
Results quantitative - Fusion1109
1899-12-31
Selected archive:	Fusion1109
Number of results selected:	53
Seq.	Sample name (1-24)	Meas. date/time	Result type	SiO2	TiO2	Al2O3	Fe2O3	MnO	MgO	CaO	Na2O	K2O	P2O5	SO3
				Si1	Ti1	Al1	Fe1	Mn1	Mg1	Ca1	Na1	K1	P1	S1
				(%)	(%)	(%)	(%)	(%)	(%)	(%)	(%)	(%)	(%)	(%)
1	MAJMON	2010-03-09 17:54:00	LLD (%)	0.0110527	0.0016813	0.0066087	0.0010757	0.0008771	0.0601422	0.0011315	0.0195738	0.001786	0.0017705	0.0019499
2	LF32773 SAL 3866	2010-03-09 18:01:00	LLD (%)	0.00774	0.0017508	0.004069	0.0011776	0.0009566	0.0259335	0.0011463	0.0061008	0.0010795	0.0009746	0.0019647
3	LF32774 SAL 3866	2010-03-09 18:08:00	LLD (%)	0.0078065	0.0017348	0.0039482	0.0011493	0.0009516	0.0247459	0.0011332	0.0059642	0.0010994	0.0008907	0.0019921
4	LF32775 SAL 3866	2010-03-09 18:15:00	LLD (%)	0.0077125	0.0017311	0.0042718	0.0011648	0.0009511	0.0257755	0.0011368	0.0061034	0.0011091	0.0008741	0.0019701
5	LF32775 SAL 3866	2010-03-09 18:23:00	LLD (%)	0.0077052	0.0017352	0.0040649	0.0011682	0.000955	0.0252156	0.0011349	0.0058763	0.0011029	0.0008671	0.001957
6	LF32777 SAL 3866	2010-03-09 18:31:00	LLD (%)	0.0076921	0.0017612	0.003896	0.0011743	0.000963	0.0246227	0.0011767	0.0059577	0.0010783	0.0008546	0.0019852
7	LF32778 SAL 3866	2010-03-09 18:38:00	LLD (%)	0.0079595	0.0017105	0.0035431	0.0011298	0.0009345	0.0234777	0.0011267	0.0057861	0.0010224	0.0008541	0.0019758
8	LF32779 SAL 3866	2010-03-09 18:45:00	LLD (%)	0.0077277	0.0017186	0.0041184	0.001172	0.0009594	0.0255252	0.0011352	0.0060746	0.0010945	0.0008453	0.0019706
9	LF32780 SAL 3866	2010-03-09 18:53:00	LLD (%)	0.0077241	0.0017692	0.0041899	0.0011613	0.0009555	0.025431	0.0011397	0.0059367	0.0011318	0.0008758	0.0019735
10	LF32781 SAL 3866	2010-03-09 19:00:00	LLD (%)	0.0075749	0.0017719	0.0046429	0.0011762	0.0009602	0.026628	0.0011364	0.0061404	0.001201	0.0008383	0.0019628
11	LF32782 SAL 3866	2010-03-09 19:07:00	LLD (%)	0.0078324	0.0017036	0.0039018	0.0011457	0.0009421	0.0242169	0.0011366	0.0058382	0.001062	0.000949	0.0019755
12	LF32783 SAL 3866	2010-03-09 19:14:00	LLD (%)	0.007973	0.001699	0.0036333	0.0011117	0.0009371	0.0235113	0.0011305	0.0056331	0.0010851	0.0008554	0.0019806
13	LF32767 MML 3869	2010-03-09 19:22:00	LLD (%)	0.0071232	0.0017328	0.0061524	0.0011447	0.0009673	0.0289691	0.0012238	0.0052974	0.0016824	0.0008002	0.0019482
14	LF32768 MML 3869	2010-03-09 19:29:00	LLD (%)	0.0071574	0.0017495	0.006062	0.001142	0.0009675	0.0287995	0.0012106	0.0053933	0.0016321	0.000802	0.0019644
15	LF32769 MML 3869	2010-03-09 19:36:00	LLD (%)	0.0070982	0.0017426	0.0062347	0.0011391	0.0009604	0.0293498	0.001222	0.0053581	0.0017292	0.0007898	0.0019485
16	LF32770 MML 3869	2010-03-09 19:44:00	LLD (%)	0.0070646	0.0017547	0.0062454	0.0011459	0.0009687	0.0294496	0.0012174	0.0053842	0.0016842	0.0007805	0.0019478
17	LF32771 MML 3869	2010-03-09 19:51:00	LLD (%)	0.0069973	0.001771	0.0064825	0.0011359	0.0009587	0.0300448	0.0012242	0.0052826	0.0017624	0.0008026	0.0019425
18	LF32772 MML 3869	2010-03-09 19:58:00	LLD (%)	0.0069884	0.0017397	0.00648	0.001141	0.0009629	0.0300688	0.0012266	0.0052287	0.0017278	0.0007888	0.0019474
19	LF32815 MML 3874	2010-03-09 20:05:00	LLD (%)	0.0069872	0.0018498	0.0061749	0.0011908	0.0010022	0.0291338	0.0012221	0.0052126	0.0017611	0.0007764	0.0019469
20	LF32814 SWL 3873	2010-03-09 20:14:00	LLD (%)	0.0055469	0.0023969	0.0037906	0.0013906	0.0012024	0.0242921	0.0019603	0.0049676	0.0010551	0.0008069	0.001847
21	LF32784 LOP 3871	2010-03-09 20:21:00	LLD (%)	0.0071954	0.0018216	0.0046183	0.0012787	0.001	0.0297618	0.0011798	0.0069139	0.0013043	0.0009923	0.0019522
22	LF32785 LOP 3871	2010-03-09 20:28:00	LLD (%)	0.0073697	0.0017167	0.0048478	0.0012473	0.0009662	0.0273361	0.0011172	0.0083419	0.0009104	0.0008938	0.0019448
23	LF32786 LOP 3871	2010-03-09 20:36:00	LLD (%)	0.0068731	0.001868	0.004616	0.0013145	0.0010342	0.0291982	0.001324	0.0074096	0.0013109	0.0010766	0.0019388
24	LF32787 LOP 3871	2010-03-09 20:43:00	LLD (%)	0.0076082	0.0017481	0.0045741	0.0011113	0.0009501	0.0272099	0.0011516	0.0079559	0.0011977	0.0008366	0.0019526
25	LF32788 LOP 3871	2010-03-09 20:50:00	LLD (%)	0.0066234	0.0019359	0.0031128	0.0015533	0.0011367	0.0315134	0.0013816	0.0062214	0.0010327	0.0008119	0.0019075
26	LF32789 LOP 3871	2010-03-09 20:58:00	LLD (%)	0.0072935	0.0017678	0.0046446	0.0012146	0.0009853	0.0292243	0.0011878	0.0073365	0.0013006	0.0009556	0.001956
27	LF32790 LOP 3871	2010-03-09 21:05:00	LLD (%)	0.0069655	0.0018535	0.0041704	0.0012759	0.0010392	0.0340299	0.0013148	0.006806	0.0011376	0.0008577	0.0019242
28	LF32791 LOP 3871	2010-03-09 21:12:00	LLD (%)	0.0069575	0.0018467	0.0047599	0.0013044	0.0010323	0.0293699	0.0012822	0.0069828	0.001334	0.0010396	0.0019417
29	LF32792 LOP 3871	2010-03-09 21:20:00	LLD (%)	0.0068357	0.0018792	0.0041638	0.0013531	0.0010589	0.0304849	0.0013507	0.0067782	0.0011455	0.0009912	0.0019338
30	LF32793 LOP 3871	2010-03-09 21:27:00	LLD (%)	0.0070005	0.0018807	0.0047811	0.0012919	0.0010305	0.029522	0.0013016	0.0069115	0.001106	0.0009775	0.0019303
31	LF32794 LOP 3871	2010-03-09 21:34:00	LLD (%)	0.0071793	0.0018027	0.0048931	0.0013007	0.0010101	0.0278668	0.0012021	0.0056737	0.0014341	0.0010557	0.0019797
32	LF32795 LOP 3871	2010-03-09 21:42:00	LLD (%)	0.0072074	0.0018024	0.0048486	0.001271	0.0010037	0.0276247	0.0012089	0.0070512	0.001259	0.0009404	0.0019597
33	LF32796 LOP 3871	2010-03-09 21:49:00	LLD (%)	0.0071544	0.0018014	0.0047451	0.0012465	0.0010094	0.0284796	0.0012561	0.0071777	0.0013164	0.0009213	0.0019471
34	LF32797 LOP 3871	2010-03-09 21:56:00	LLD (%)	0.0073833	0.0017829	0.0048536	0.0012779	0.0009936	0.0260877	0.0011758	0.0051186	0.0014734	0.0008733	0.0019641
35	LF32798 LOP 3871	2010-03-09 22:04:00	LLD (%)	0.0072944	0.0017823	0.0050153	0.0012008	0.0009719	0.0290824	0.001189	0.0072672	0.001308	0.000989	0.0019547
36	LF32799 LOP 3871	2010-03-09 22:11:00	LLD (%)	0.0072584	0.0017691	0.0049245	0.0012025	0.0009772	0.0305125	0.0011869	0.0074294	0.0012466	0.0009521	0.0019539
37	LF32800 LOP 3871	2010-03-09 22:18:00	LLD (%)	0.007203	0.0017936	0.0049112	0.0012194	0.0009908	0.0292349	0.0012177	0.007385	0.0012701	0.0009377	0.0019567
38	LF32801 LOP 3871	2010-03-09 22:25:00	LLD (%)	0.0074543	0.0017409	0.0047517	0.0012537	0.000978	0.0274676	0.0011562	0.0051566	0.001154	0.0008796	0.0019715
39	LF32802 LOP 3871	2010-03-09 22:33:00	LLD (%)	0.0068766	0.0018631	0.0044672	0.0013694	0.0010604	0.0303228	0.0013349	0.0068326	0.001093	0.0010992	0.0019317
40	LF32803 LOP 3871	2010-03-09 22:40:00	LLD (%)	0.0074563	0.0017749	0.0044932	0.0011036	0.0009361	0.0265577	0.0011434	0.0077972	0.0012331	0.0008336	0.0019708
41	LF32804 LOP 3871	2010-03-09 22:47:00	LLD (%)	0.0074674	0.0018885	0.0046145	0.0011714	0.000969	0.027061	0.0011698	0.0073549	0.0013534	0.0009641	0.0019742
42	LF32805 LOP 3871	2010-03-09 22:55:00	LLD (%)	0.0071975	0.0017525	0.0050531	0.0012029	0.0009722	0.0299048	0.0011741	0.0071617	0.0012999	0.0008783	0.0019683
43	LF32806 LOP 3871	2010-03-09 23:02:00	LLD (%)	0.0071163	0.0017841	0.0048548	0.0012282	0.0009969	0.0289086	0.001235	0.0073433	0.0013009	0.0009712	0.001955
44	BH-1	2010-03-09 23:09:00	LLD (%)	0.00762	0.001708	0.0042811	0.0011643	0.0009549	0.0267859	0.0011713	0.0067173	0.0010207	0.0008291	0.0019583
45	WS-1	2010-03-09 23:17:00	LLD (%)	0.0070119	0.0019264	0.004215	0.0013613	0.0010512	0.0288752	0.0012721	0.0066541	0.0010644	0.0009032	0.0019442
46	BCS375	2010-03-09 23:24:00	LLD (%)	0.00761	0.0016705	0.0049097	0.0010291	0.0008898	0.0278376	0.0011287	0.0088692	0.00098	0.000797	0.0019709
47	BCS376	2010-03-09 23:32:00	LLD (%)	0.0075445	0.0017645	0.0046317	0.0010898	0.0009498	0.02482	0.0012453	0.0060147	0.0018047	0.0007961	0.0019625
48	SiO2	2010-03-09 23:39:00	LLD (%)	0.0083925	0.0016304	0.0016009	0.0010217	0.0008864	0.0179894	0.0011023	0.0043579	0.0008839	0.0008392	0.0020245
49	Blank	2010-03-09 23:46:00	LLD (%)	0.0046958	0.0018029	0.0012911	0.0010824	0.0009442	0.0032054	0.001176	0.0034416	0.0010005	0.0007197	0.0019378
50	Al2O3	2010-03-09 23:54:00	LLD (%)	0.0047368	0.0016131	0.0104329	0.0009939	0.000875	0.0424805	0.0010902	0.0056214	0.0008938	0.0007492	0.0019315
51	MRG-1	2010-03-10 00:01:00	LLD (%)	0.0064968	0.0020358	0.0035057	0.0014942	0.0011208	0.0338765	0.0013576	0.0063117	0.0009992	0.0007903	0.0019176
52	JP-1	2010-03-10 00:09:00	LLD (%)	0.0067804	0.0016556	0.0017782	0.0011623	0.0009683	0.0513485	0.0011055	0.0079239	0.0009209	0.0007545	0.001935
53	BCS372/1	2010-03-10 00:16:00	LLD (%)	0.0054649	0.0024003	0.0028016	0.0014862	0.0012614	0.0195026	0.0020427	0.0047067	0.0011279	0.0007615	0.0019993
Run repeat
1	MAJMON	2010-03-10 12:33:00	LLD (%)	0.0110398	0.0016772	0.0065824	0.0010781	0.0008688	0.0601174	0.0011416	0.0195531	0.0017889	0.0017632	0.0019458
2	LF32773 SAL 3866	2010-03-10 12:40:00	LLD (%)	0.0077057	0.0017364	0.0040498	0.0011785	0.0009566	0.0257593	0.0011349	0.0061047	0.0010699	0.00096	0.0019643
3	LF32774 SAL 3866	2010-03-10 12:48:00	LLD (%)	0.0078243	0.0017368	0.0039658	0.0011454	0.0009389	0.0247203	0.0011409	0.005946	0.0010989	0.0008701	0.0019767
4	LF32775 SAL 3866	2010-03-10 12:55:00	LLD (%)	0.0077006	0.0017357	0.0042565	0.0011682	0.000951	0.025684	0.0011394	0.0061009	0.0011259	0.0008823	0.0019757
5	LF32775 SAL 3866	2010-03-10 13:02:00	LLD (%)	0.00778	0.0017287	0.0040906	0.0011664	0.0009453	0.0252659	0.0011352	0.0058809	0.0010985	0.0008623	0.0019584
6	LF32777 SAL 3866	2010-03-10 13:09:00	LLD (%)	0.0077296	0.0017457	0.0038687	0.0011693	0.0009612	0.0248124	0.0011788	0.0059424	0.001061	0.0008429	0.0019765
7	LF32778 SAL 3866	2010-03-10 13:17:00	LLD (%)	0.0079134	0.0017082	0.0035474	0.0011261	0.0009275	0.0234611	0.0011284	0.0057744	0.0010294	0.0008584	0.0019738
8	LF32779 SAL 3866	2010-03-10 13:24:00	LLD (%)	0.0077226	0.0017259	0.0041047	0.0011714	0.0009615	0.0255696	0.001139	0.0060524	0.001085	0.000832	0.001976
9	LF32780 SAL 3866	2010-03-10 13:31:00	LLD (%)	0.0077189	0.0017651	0.0041809	0.0011625	0.0009504	0.0253366	0.0011424	0.0059374	0.0011332	0.0008697	0.0019831
10	LF32781 SAL 3866	2010-03-10 13:39:00	LLD (%)	0.007583	0.0017663	0.0046423	0.0011743	0.0009519	0.0267218	0.0011417	0.0061691	0.0011861	0.0008427	0.0019671
11	LF32782 SAL 3866	2010-03-10 13:46:00	LLD (%)	0.0078493	0.0017282	0.0038855	0.0011405	0.000935	0.0244256	0.0011323	0.0058416	0.0010778	0.0009442	0.0019663
12	LF32783 SAL 3866	2010-03-10 13:53:00	LLD (%)	0.0079429	0.0017153	0.0036193	0.0011257	0.0009267	0.0236804	0.0011312	0.0056248	0.0010614	0.0008681	0.001983
13	LF32767 MML 3869	2010-03-10 14:01:00	LLD (%)	0.0070487	0.0017356	0.0061546	0.0011397	0.000966	0.0290563	0.0012193	0.0053196	0.001684	0.0007883	0.0019439
14	LF32768 MML 3869	2010-03-10 14:08:00	LLD (%)	0.0072025	0.0017188	0.0060567	0.0011408	0.0009612	0.0288731	0.0012172	0.0053741	0.0016579	0.0007858	0.001944
15	LF32769 MML 3869	2010-03-10 14:15:00	LLD (%)	0.007059	0.0017559	0.0062762	0.0011399	0.0009675	0.0295611	0.0012235	0.0053918	0.0017033	0.0008014	0.0019319
16	LF32770 MML 3869	2010-03-10 14:23:00	LLD (%)	0.0070211	0.0017552	0.0062564	0.0011417	0.000966	0.0293999	0.0012216	0.0053783	0.0016768	0.0007837	0.001959
17	LF32771 MML 3869	2010-03-10 14:30:00	LLD (%)	0.0070016	0.0017496	0.0064855	0.0011383	0.0009695	0.0300268	0.0012267	0.005227	0.0017669	0.0007956	0.0019472
18	LF32772 MML 3869	2010-03-10 14:37:00	LLD (%)	0.0070139	0.0017389	0.0064753	0.0011417	0.0009678	0.030144	0.0012309	0.005224	0.0017231	0.0007968	0.0019388
19	LF32815 MML 3874	2010-03-10 14:44:00	LLD (%)	0.0070051	0.0018526	0.0061462	0.0011904	0.0009797	0.0291003	0.0012297	0.0052416	0.0017406	0.0007942	0.0019456
20	LF32814 SWL 3873	2010-03-10 14:52:00	LLD (%)	0.0055449	0.0023632	0.0037982	0.0013926	0.0012065	0.0242609	0.0019575	0.0049924	0.0010309	0.0008074	0.0018388
21	LF32784 LOP 3871	2010-03-10 14:59:00	LLD (%)	0.0072195	0.0018179	0.0046126	0.0012809	0.0010017	0.0298182	0.0011747	0.0069863	0.0013006	0.0009824	0.0019684
22	LF32785 LOP 3871	2010-03-10 15:06:00	LLD (%)	0.0073997	0.0017173	0.0048245	0.0012429	0.000967	0.0272657	0.0011096	0.0083718	0.0009321	0.0008951	0.0019575
23	LF32786 LOP 3871	2010-03-10 15:14:00	LLD (%)	0.0068952	0.0018451	0.0046128	0.0013226	0.0010346	0.0292695	0.0013182	0.0074068	0.0013267	0.0010871	0.001916
24	LF32787 LOP 3871	2010-03-10 15:21:00	LLD (%)	0.0076031	0.0017636	0.0045872	0.0011139	0.0009488	0.0273519	0.001137	0.0078759	0.0011735	0.0008436	0.0019648
25	LF32788 LOP 3871	2010-03-10 15:28:00	LLD (%)	0.0066116	0.0019337	0.0030694	0.0015502	0.0011335	0.0315921	0.0013872	0.0061829	0.0010073	0.0008212	0.0019056
26	LF32789 LOP 3871	2010-03-10 15:36:00	LLD (%)	0.0073294	0.0017675	0.0046132	0.0012147	0.0009733	0.0293425	0.0011853	0.0073569	0.0012987	0.0009373	0.0019503
27	LF32790 LOP 3871	2010-03-10 15:43:00	LLD (%)	0.0069476	0.0018507	0.0041982	0.0012788	0.0010387	0.0339763	0.0013094	0.0068274	0.0011623	0.0008491	0.0019179
28	LF32791 LOP 3871	2010-03-10 15:51:00	LLD (%)	0.0069202	0.0018638	0.0047311	0.0013139	0.0010285	0.029406	0.0012813	0.0070333	0.0013418	0.0010505	0.0019378
29	LF32792 LOP 3871	2010-03-10 15:58:00	LLD (%)	0.0068895	0.001908	0.0041662	0.0013395	0.0010527	0.0306366	0.0013447	0.0067688	0.0011423	0.0009977	0.0019153
30	LF32793 LOP 3871	2010-03-10 16:05:00	LLD (%)	0.0070047	0.0018663	0.0047602	0.0012865	0.0010235	0.0297004	0.0012982	0.006896	0.0011297	0.0009841	0.0019212
31	LF32794 LOP 3871	2010-03-10 16:13:00	LLD (%)	0.0071662	0.0017857	0.0048902	0.0013079	0.0010254	0.0277582	0.0011978	0.0056972	0.0014477	0.0010486	0.0019638
32	LF32795 LOP 3871	2010-03-10 16:20:00	LLD (%)	0.0072235	0.0017909	0.0048607	0.0012706	0.0010034	0.0276705	0.0012087	0.0070545	0.0012932	0.0009417	0.0019514
33	LF32796 LOP 3871	2010-03-10 16:27:00	LLD (%)	0.0071298	0.0018076	0.0047352	0.0012387	0.0010037	0.0286358	0.0012569	0.00711	0.0013185	0.0009314	0.0019389
34	LF32797 LOP 3871	2010-03-10 16:34:00	LLD (%)	0.007361	0.0017514	0.0048517	0.0012706	0.0010003	0.0260835	0.0011837	0.0051278	0.0014675	0.0008879	0.0019571
35	LF32798 LOP 3871	2010-03-10 16:42:00	LLD (%)	0.0073061	0.0017623	0.0050331	0.0012035	0.0009766	0.0292865	0.0011951	0.0072558	0.0012762	0.0009844	0.0019539
36	LF32799 LOP 3871	2010-03-10 16:49:00	LLD (%)	0.0072528	0.00176	0.0049246	0.0012039	0.000968	0.0304571	0.0011928	0.0074227	0.0012437	0.000961	0.0019447
37	LF32800 LOP 3871	2010-03-10 16:56:00	LLD (%)	0.0071603	0.0017861	0.0049089	0.0012206	0.0009893	0.0292639	0.0012274	0.0073629	0.0012707	0.0009499	0.0019322
38	LF32801 LOP 3871	2010-03-10 17:04:00	LLD (%)	0.007475	0.0017431	0.0047333	0.0012435	0.0009808	0.0274523	0.0011421	0.0051647	0.0011708	0.0008935	0.0019426
39	LF32802 LOP 3871	2010-03-10 17:11:00	LLD (%)	0.0068189	0.0018672	0.0044554	0.0013602	0.001059	0.0304487	0.001329	0.0067876	0.0010801	0.00108	0.0019347
40	LF32803 LOP 3871	2010-03-10 17:18:00	LLD (%)	0.0074252	0.0017587	0.0045103	0.0011095	0.0009332	0.0267124	0.0011425	0.0077768	0.001212	0.0008353	0.0019755
41	LF32804 LOP 3871	2010-03-10 17:26:00	LLD (%)	0.0074597	0.0018958	0.0046035	0.0011757	0.0009611	0.0270773	0.0011638	0.0073005	0.0013668	0.0009513	0.0019637
42	LF32805 LOP 3871	2010-03-10 17:33:00	LLD (%)	0.0072248	0.0017744	0.0050307	0.0012021	0.0009745	0.0298963	0.0011851	0.0072524	0.0013078	0.0008887	0.0019731
43	LF32806 LOP 3871	2010-03-10 17:40:00	LLD (%)	0.0071516	0.0018044	0.0048548	0.0012163	0.000998	0.0287665	0.00124	0.0073675	0.0012823	0.0009561	0.0019707

## Sheet: afus278 cse
2010-03-19 11:59:21
PANalytical
Results quantitative - Fusion1109
Selected archive:	Fusion1109
Number of results selected:	53
Seq.	Sample name (1-24)	Meas. date/time	Result type	SiO2	TiO2	Al2O3	Fe2O3	MnO	MgO	CaO	Na2O	K2O	P2O5	SO3
				Si1	Ti1	Al1	Fe1	Mn1	Mg1	Ca1	Na1	K1	P1	S1
				(%)	(%)	(%)	(%)	(%)	(%)	(%)	(%)	(%)	(%)	(%)
1	MAJMON	2010-03-09 17:54:00	CSE in concentration	0.053	0.006	0.028	0.003	0.001	0.057	0.005	0.032	0.009	0.005	0.001
2	LF32773 SAL 3866	2010-03-09 18:01:00	CSE in concentration	0.034	0.002	0.017	0.003	0.001	0.021	0.003	0.007	0.003	0.002	0.001
3	LF32774 SAL 3866	2010-03-09 18:08:00	CSE in concentration	0.034	0.003	0.016	0.003	0.001	0.019	0.002	0.007	0.003	0.001	0.001
4	LF32775 SAL 3866	2010-03-09 18:15:00	CSE in concentration	0.034	0.002	0.018	0.003	0.001	0.02	0.002	0.007	0.004	0.001	0.001
5	LF32775 SAL 3866	2010-03-09 18:23:00	CSE in concentration	0.034	0.002	0.017	0.003	0.001	0.02	0.002	0.007	0.004	0.001	0.001
6	LF32777 SAL 3866	2010-03-09 18:31:00	CSE in concentration	0.034	0.002	0.016	0.003	0.001	0.019	0.005	0.007	0.003	0.001	0.001
7	LF32778 SAL 3866	2010-03-09 18:38:00	CSE in concentration	0.035	0.002	0.014	0.002	0	0.018	0.002	0.006	0.003	0.001	0.001
8	LF32779 SAL 3866	2010-03-09 18:45:00	CSE in concentration	0.034	0.002	0.017	0.003	0.001	0.02	0.002	0.007	0.004	0.001	0.002
9	LF32780 SAL 3866	2010-03-09 18:53:00	CSE in concentration	0.034	0.002	0.017	0.003	0.001	0.02	0.002	0.007	0.004	0.001	0.001
10	LF32781 SAL 3866	2010-03-09 19:00:00	CSE in concentration	0.033	0.003	0.02	0.003	0.001	0.02	0.001	0.007	0.004	0.001	0.001
11	LF32782 SAL 3866	2010-03-09 19:07:00	CSE in concentration	0.034	0.002	0.016	0.002	0	0.018	0.002	0.007	0.003	0.002	0.001
12	LF32783 SAL 3866	2010-03-09 19:14:00	CSE in concentration	0.035	0.002	0.015	0.002	0.001	0.018	0.002	0.006	0.003	0.001	0.001
13	LF32767 MML 3869	2010-03-09 19:22:00	CSE in concentration	0.029	0.002	0.027	0.002	0.001	0.018	0.001	0.004	0.008	0.001	0.001
14	LF32768 MML 3869	2010-03-09 19:29:00	CSE in concentration	0.03	0.002	0.026	0.002	0	0.017	0.001	0.005	0.008	0.001	0.001
15	LF32769 MML 3869	2010-03-09 19:36:00	CSE in concentration	0.029	0.002	0.027	0.002	0	0.018	0.001	0.005	0.008	0.001	0.001
16	LF32770 MML 3869	2010-03-09 19:44:00	CSE in concentration	0.029	0.002	0.027	0.002	0	0.018	0.001	0.005	0.008	0.001	0.001
17	LF32771 MML 3869	2010-03-09 19:51:00	CSE in concentration	0.028	0.002	0.028	0.002	0	0.018	0.001	0.004	0.008	0.001	0.001
18	LF32772 MML 3869	2010-03-09 19:58:00	CSE in concentration	0.028	0.002	0.028	0.002	0	0.018	0.001	0.004	0.008	0.001	0.001
19	LF32815 MML 3874	2010-03-09 20:05:00	CSE in concentration	0.028	0.002	0.027	0.003	0	0.018	0.001	0.004	0.008	0	0.001
20	LF32814 SWL 3873	2010-03-09 20:14:00	CSE in concentration	0.018	0.002	0.016	0.001	0.001	0.024	0.02	0.003	0.001	0.001	0.002
21	LF32784 LOP 3871	2010-03-09 20:21:00	CSE in concentration	0.03	0.003	0.019	0.004	0.001	0.028	0.003	0.008	0.005	0.002	0.001
22	LF32785 LOP 3871	2010-03-09 20:28:00	CSE in concentration	0.031	0.003	0.02	0.004	0.001	0.016	0.002	0.012	0.001	0.001	0.001
23	LF32786 LOP 3871	2010-03-09 20:36:00	CSE in concentration	0.028	0.003	0.019	0.004	0.001	0.027	0.008	0.01	0.005	0.002	0.001
24	LF32787 LOP 3871	2010-03-09 20:43:00	CSE in concentration	0.033	0.001	0.019	0.002	0.001	0.019	0.002	0.011	0.004	0.001	0.001
25	LF32788 LOP 3871	2010-03-09 20:50:00	CSE in concentration	0.026	0.003	0.012	0.006	0.001	0.039	0.01	0.005	0.002	0.001	0.001
26	LF32789 LOP 3871	2010-03-09 20:58:00	CSE in concentration	0.031	0.002	0.019	0.003	0.001	0.026	0.004	0.01	0.005	0.002	0.001
27	LF32790 LOP 3871	2010-03-09 21:05:00	CSE in concentration	0.028	0.002	0.017	0.003	0.001	0.04	0.008	0.007	0.004	0.001	0.001
28	LF32791 LOP 3871	2010-03-09 21:12:00	CSE in concentration	0.028	0.003	0.02	0.004	0.001	0.027	0.007	0.009	0.005	0.002	0.001
29	LF32792 LOP 3871	2010-03-09 21:20:00	CSE in concentration	0.028	0.002	0.017	0.004	0.001	0.033	0.009	0.008	0.004	0.002	0.001
30	LF32793 LOP 3871	2010-03-09 21:27:00	CSE in concentration	0.029	0.003	0.02	0.003	0.001	0.027	0.008	0.009	0.004	0.002	0.001
31	LF32794 LOP 3871	2010-03-09 21:34:00	CSE in concentration	0.03	0.003	0.021	0.004	0.001	0.023	0.003	0.005	0.006	0.002	0.002
32	LF32795 LOP 3871	2010-03-09 21:42:00	CSE in concentration	0.03	0.003	0.021	0.004	0.001	0.021	0.005	0.009	0.005	0.002	0.001
33	LF32796 LOP 3871	2010-03-09 21:49:00	CSE in concentration	0.03	0.002	0.02	0.003	0.001	0.024	0.006	0.009	0.005	0.002	0.001
34	LF32797 LOP 3871	2010-03-09 21:56:00	CSE in concentration	0.031	0.002	0.021	0.004	0	0.019	0.001	0.004	0.006	0.001	0.001
35	LF32798 LOP 3871	2010-03-09 22:04:00	CSE in concentration	0.03	0.002	0.021	0.003	0.001	0.024	0.004	0.01	0.005	0.002	0.001
36	LF32799 LOP 3871	2010-03-09 22:11:00	CSE in concentration	0.03	0.002	0.021	0.003	0.001	0.027	0.004	0.01	0.005	0.002	0.002
37	LF32800 LOP 3871	2010-03-09 22:18:00	CSE in concentration	0.03	0.002	0.021	0.003	0.001	0.025	0.006	0.01	0.005	0.002	0.001
38	LF32801 LOP 3871	2010-03-09 22:25:00	CSE in concentration	0.032	0.003	0.02	0.004	0.001	0.023	0.003	0.003	0.004	0.001	0.001
39	LF32802 LOP 3871	2010-03-09 22:33:00	CSE in concentration	0.028	0.003	0.019	0.004	0.001	0.031	0.009	0.008	0.003	0.002	0.001
40	LF32803 LOP 3871	2010-03-09 22:40:00	CSE in concentration	0.032	0.002	0.019	0.002	0	0.019	0.002	0.011	0.005	0.001	0.001
41	LF32804 LOP 3871	2010-03-09 22:47:00	CSE in concentration	0.032	0.002	0.019	0.003	0.001	0.02	0.002	0.01	0.006	0.002	0.001
42	LF32805 LOP 3871	2010-03-09 22:55:00	CSE in concentration	0.03	0.002	0.021	0.003	0.001	0.025	0.004	0.009	0.005	0.001	0.002
43	LF32806 LOP 3871	2010-03-09 23:02:00	CSE in concentration	0.03	0.002	0.021	0.003	0.001	0.024	0.006	0.01	0.005	0.002	0.002
44	BH-1	2010-03-09 23:09:00	CSE in concentration	0.033	0.002	0.018	0.003	0.001	0.022	0.005	0.009	0.002	0.001	0.001
45	WS-1	2010-03-09 23:17:00	CSE in concentration	0.029	0.004	0.018	0.004	0.001	0.029	0.008	0.008	0.003	0.001	0.001
46	BCS375	2010-03-09 23:24:00	CSE in concentration	0.033	0.002	0.021	0.001	0	0.016	0.002	0.014	0.002	0.001	0.001
47	BCS376	2010-03-09 23:32:00	CSE in concentration	0.032	0.001	0.02	0.001	0	0.014	0.002	0.007	0.009	0	0.001
48	SiO2	2010-03-09 23:39:00	CSE in concentration	0.038	0.001	0.002	0	0	0.012	0.001	0.002	0.001	0	0.001
49	Blank	2010-03-09 23:46:00	CSE in concentration	0.001	0.001	0.001	0	0	0.007	0.001	0.002	0.001	0	0.001
50	Al2O3	2010-03-09 23:54:00	CSE in concentration	0.002	0.001	0.046	0	0	0.022	0.001	0.004	0.001	0	0.001
51	MRG-1	2010-03-10 00:01:00	CSE in concentration	0.025	0.005	0.014	0.005	0.001	0.042	0.01	0.005	0.001	0.001	0.001
52	JP-1	2010-03-10 00:09:00	CSE in concentration	0.027	0.001	0.004	0.003	0.001	0.073	0.002	0.004	0.001	0	0.001
53	BCS372/1	2010-03-10 00:16:00	CSE in concentration	0.018	0.002	0.011	0.003	0.001	0.017	0.021	0.003	0.002	0.001	0.005
Run repeat
2010-03-19 14:09:35
PANalytical
Results quantitative - Fusion1109
Selected archive:	Fusion1109
Number of results selected:	43
Seq.	Sample name (1-24)	Meas. date/time	Result type	SiO2	TiO2	Al2O3	Fe2O3	MnO	MgO	CaO	Na2O	K2O	P2O5	SO3
				Si1	Ti1	Al1	Fe1	Mn1	Mg1	Ca1	Na1	K1	P1	S1
				(%)	(%)	(%)	(%)	(%)	(%)	(%)	(%)	(%)	(%)	(%)
1	MAJMON	2010-03-10 12:33:00	CSE in concentration	0.053	0.006	0.028	0.003	0.001	0.057	0.005	0.032	0.009	0.005	0.001
2	LF32773 SAL 3866	2010-03-10 12:40:00	CSE in concentration	0.034	0.002	0.017	0.003	0.001	0.021	0.003	0.007	0.003	0.002	0.001
3	LF32774 SAL 3866	2010-03-10 12:48:00	CSE in concentration	0.034	0.003	0.016	0.003	0.001	0.019	0.002	0.007	0.003	0.001	0.001
4	LF32775 SAL 3866	2010-03-10 12:55:00	CSE in concentration	0.034	0.002	0.018	0.003	0.001	0.02	0.002	0.007	0.004	0.001	0.001
5	LF32775 SAL 3866	2010-03-10 13:02:00	CSE in concentration	0.034	0.002	0.017	0.003	0.001	0.02	0.002	0.007	0.004	0.001	0.001
6	LF32777 SAL 3866	2010-03-10 13:09:00	CSE in concentration	0.034	0.002	0.016	0.003	0.001	0.019	0.005	0.007	0.003	0.001	0.001
7	LF32778 SAL 3866	2010-03-10 13:17:00	CSE in concentration	0.035	0.002	0.014	0.002	0	0.018	0.002	0.006	0.003	0.001	0.001
8	LF32779 SAL 3866	2010-03-10 13:24:00	CSE in concentration	0.034	0.002	0.017	0.003	0.001	0.02	0.002	0.007	0.004	0.001	0.002
9	LF32780 SAL 3866	2010-03-10 13:31:00	CSE in concentration	0.034	0.002	0.017	0.003	0.001	0.019	0.002	0.007	0.004	0.001	0.001
10	LF32781 SAL 3866	2010-03-10 13:39:00	CSE in concentration	0.033	0.003	0.02	0.003	0.001	0.02	0.001	0.007	0.004	0.001	0.001
11	LF32782 SAL 3866	2010-03-10 13:46:00	CSE in concentration	0.034	0.002	0.016	0.002	0	0.018	0.002	0.007	0.003	0.002	0.001
12	LF32783 SAL 3866	2010-03-10 13:53:00	CSE in concentration	0.035	0.002	0.015	0.002	0.001	0.018	0.002	0.006	0.003	0.001	0.001
13	LF32767 MML 3869	2010-03-10 14:01:00	CSE in concentration	0.029	0.002	0.027	0.002	0.001	0.018	0.001	0.004	0.008	0.001	0.001
14	LF32768 MML 3869	2010-03-10 14:08:00	CSE in concentration	0.03	0.002	0.026	0.002	0	0.017	0.001	0.005	0.008	0.001	0.001
15	LF32769 MML 3869	2010-03-10 14:15:00	CSE in concentration	0.029	0.002	0.027	0.002	0	0.018	0.001	0.005	0.008	0.001	0.001
16	LF32770 MML 3869	2010-03-10 14:23:00	CSE in concentration	0.029	0.002	0.027	0.002	0	0.018	0.001	0.005	0.008	0.001	0.001
17	LF32771 MML 3869	2010-03-10 14:30:00	CSE in concentration	0.028	0.002	0.028	0.002	0	0.018	0.001	0.004	0.008	0.001	0.001
18	LF32772 MML 3869	2010-03-10 14:37:00	CSE in concentration	0.028	0.002	0.028	0.002	0	0.018	0.001	0.004	0.008	0.001	0.001
19	LF32815 MML 3874	2010-03-10 14:44:00	CSE in concentration	0.028	0.002	0.027	0.003	0	0.018	0.001	0.004	0.008	0	0.001
20	LF32814 SWL 3873	2010-03-10 14:52:00	CSE in concentration	0.018	0.002	0.016	0.001	0.001	0.024	0.02	0.003	0.001	0.001	0.002
21	LF32784 LOP 3871	2010-03-10 14:59:00	CSE in concentration	0.03	0.003	0.019	0.004	0.001	0.028	0.003	0.008	0.005	0.002	0.001
22	LF32785 LOP 3871	2010-03-10 15:06:00	CSE in concentration	0.031	0.003	0.02	0.004	0.001	0.016	0.002	0.012	0.001	0.001	0.001
23	LF32786 LOP 3871	2010-03-10 15:14:00	CSE in concentration	0.028	0.003	0.019	0.004	0.001	0.027	0.008	0.01	0.005	0.002	0.001
24	LF32787 LOP 3871	2010-03-10 15:21:00	CSE in concentration	0.033	0.001	0.019	0.002	0.001	0.019	0.002	0.011	0.004	0.001	0.001
25	LF32788 LOP 3871	2010-03-10 15:28:00	CSE in concentration	0.026	0.003	0.012	0.006	0.001	0.039	0.01	0.005	0.002	0.001	0.001
26	LF32789 LOP 3871	2010-03-10 15:36:00	CSE in concentration	0.031	0.002	0.019	0.003	0.001	0.026	0.004	0.01	0.005	0.002	0.001
27	LF32790 LOP 3871	2010-03-10 15:43:00	CSE in concentration	0.029	0.002	0.017	0.003	0.001	0.04	0.008	0.007	0.004	0.001	0.001
28	LF32791 LOP 3871	2010-03-10 15:51:00	CSE in concentration	0.028	0.003	0.02	0.004	0.001	0.027	0.007	0.009	0.005	0.002	0.001
29	LF32792 LOP 3871	2010-03-10 15:58:00	CSE in concentration	0.028	0.002	0.017	0.004	0.001	0.033	0.009	0.008	0.004	0.002	0.001
30	LF32793 LOP 3871	2010-03-10 16:05:00	CSE in concentration	0.029	0.003	0.02	0.003	0.001	0.027	0.008	0.009	0.004	0.002	0.001
31	LF32794 LOP 3871	2010-03-10 16:13:00	CSE in concentration	0.03	0.003	0.021	0.004	0.001	0.023	0.003	0.005	0.006	0.002	0.002
32	LF32795 LOP 3871	2010-03-10 16:20:00	CSE in concentration	0.03	0.003	0.021	0.004	0.001	0.021	0.005	0.009	0.005	0.002	0.001
33	LF32796 LOP 3871	2010-03-10 16:27:00	CSE in concentration	0.03	0.002	0.02	0.003	0.001	0.024	0.006	0.009	0.005	0.002	0.001
34	LF32797 LOP 3871	2010-03-10 16:34:00	CSE in concentration	0.031	0.002	0.021	0.004	0	0.019	0.001	0.004	0.006	0.001	0.001
35	LF32798 LOP 3871	2010-03-10 16:42:00	CSE in concentration	0.03	0.002	0.021	0.003	0.001	0.024	0.004	0.01	0.005	0.002	0.001
36	LF32799 LOP 3871	2010-03-10 16:49:00	CSE in concentration	0.03	0.002	0.021	0.003	0.001	0.027	0.004	0.01	0.005	0.002	0.002
37	LF32800 LOP 3871	2010-03-10 16:56:00	CSE in concentration	0.03	0.002	0.021	0.003	0.001	0.025	0.006	0.01	0.005	0.002	0.001
38	LF32801 LOP 3871	2010-03-10 17:04:00	CSE in concentration	0.032	0.003	0.02	0.004	0.001	0.023	0.003	0.003	0.004	0.001	0.001
39	LF32802 LOP 3871	2010-03-10 17:11:00	CSE in concentration	0.028	0.003	0.019	0.004	0.001	0.031	0.009	0.008	0.003	0.002	0.001
40	LF32803 LOP 3871	2010-03-10 17:18:00	CSE in concentration	0.032	0.002	0.019	0.002	0	0.019	0.002	0.011	0.005	0.001	0.001
41	LF32804 LOP 3871	2010-03-10 17:26:00	CSE in concentration	0.032	0.002	0.019	0.003	0.001	0.02	0.002	0.01	0.006	0.002	0.001
42	LF32805 LOP 3871	2010-03-10 17:33:00	CSE in concentration	0.03	0.002	0.021	0.003	0.001	0.025	0.004	0.009	0.005	0.001	0.002
43	LF32806 LOP 3871	2010-03-10 17:40:00	CSE in concentration	0.03	0.002	0.021	0.003	0.001	0.024	0.006	0.01	0.005	0.002	0.002

## Sheet: Olive's 3871 loi
LOI data for Olive Ponyalou Job3871 01/03/10
Job	Pellet	Bead	Sample	Crucible	Cruc.wt.	Cruc.+sam	Ignited	%LOI
OLP3871	L49943	LF32784	OP-N1	F1	14.4172	16.4522	16.3876	3.17445
OLP3871	L49944	LF32785	OP-N2	5	13.4577	14.7702	14.7249	3.45143
OLP3871	L49945	LF32786	OP-N3	I	13.9256	17.1202	17.0671	1.66218
OLP3871	L49946	LF32787	OP-N4C	M1	14.2043	16.5512	16.4991	2.21995
OLP3871	L49947	LF32788	OP-N6	T	14.0984	18.7937	18.7703	0.498371
OLP3871	L49948	LF32789	OP-N5	C1	14.4352	16.5862	16.5469	1.82706
OLP3871	L49949	LF32790	OP-N7	E1	14.5397	17.4854	17.4277	1.95879
OLP3871	L49950	LF32791	OP-N8B	5	14.0176	15.9787	15.9204	2.97282
OLP3871	L49951	LF32792	OP-N8A	V	14.2083	16.2566	16.1999	2.76815
OLP3871	L49952	LF32793	OP-BA1	L	14.2427	16.7464	16.6973	1.9611
OLP3871	L49953	LF32794	OP-BA2	7	13.5603	16.0487	15.9317	4.70182
OLP3871	L49954	LF32795	OP-BA3	2	14.1159	16.5773	16.5353	1.70635
OLP3871	L49955	LF32796	OP-NA1	R	14.1272	16.7747	16.7481	1.00472
OLP3871	L49956	LF32797	OP-NA2	P1	14.8111	16.6188	16.4705	8.20379
OLP3871	L49957	LF32798	OP-NA3A	F	14.0321	15.583	15.5206	4.02347
OLP3871	L49959	LF32799	OP-NA3B	N	14.6251	16.562	16.5025	3.07192
OLP3871	L49961	LF32800	OP-NA5	1	14.5314	17.2626	17.2329	1.08743
OLP3871	L49962	LF32801	OP-NA6	N1	13.719	15.8521	15.7059	6.85387
OLP3871	L49963	LF32802	OP-OL1	P	14.0706	16.192	16.146	2.16838
OLP3871	L49997	LF32803	OP-N4A	H	14.05	16.1836	16.1328	2.38095
OLP3871	L49998	LF32804	OP-N4B	11	14.5248	16.0473	15.9964	3.34319
OLP3871	L49958	LF32805	OP-NA3A	A	14.1919	16.1125	16.0099	5.34208
OLP3871	L49960	LF32806	OP-NA4	7	22.8642	26.976	26.9273	1.1844

## Sheet: axrht322
2010-05-25 12:18:27
		Calculated off line by NGM
Results for - RHTHP
Selected archive:	RHTHP
Number of results selected:	RHT1
Seq.	Sample name	Meas. date/time	Result type	Rb	Sr	Y	Zr	Nb	Mo	Pb	Th	U
				Rb1	Sr1	Y1	Zr1	Nb1	Mo1	Pb1	Th2 (La1)	U
				(ppm)	(ppm)	(ppm)	(ppm)	(ppm)	(ppm)	(ppm)	(ppm)	(ppm)
1	Blank	2010-03-12 20:05:00	Concentration	1.85833	1.68993	0.622554	3.01564	-0.166464	-0.21747	0.224066	-0.647503	0.363762
2	AUSMONF	2010-03-12 20:24:00	Concentration	1966.41	1886.18	2003.31	1793.43	1795.75	1479.5	2273.44	2594.23	2316.65
3	BCS313/1	2010-03-12 20:43:00	Concentration	1.92045	3.1163	1.28675	29.2978	0.343582	-0.403135	2.65577	-1.29451	-0.00293628
4	NIM-G	2010-03-12 21:02:00	Concentration	321.219	11.9907	144.536	290.064	56.0066	1.1565	36.8856	50.4479	15.3418
5	MRG-1	2010-03-12 21:21:00	Concentration	8.74865	273.863	14.6544	110.564	21.21	2.59372	5.06232	0.922002	0.832305
6	MA-N	2010-03-12 21:40:00	Concentration	3599.26	87.5111	0.914953	27.3576	172.785	-0.18954	29.1195	1.58864	12.5601
7	STM-1	2010-03-12 21:59:00	Concentration	117.337	702.954	44.4618	1360.74	269.441	5.65061	19.0852	31.6747	9.33186
8	PCC-1	2010-03-12 22:17:00	Concentration	1.91968	2.27565	0.898022	3.78939	0.170854	0.473421	9.04418	-0.567161	0.141105
9	BHVO-1	2010-03-12 22:36:00	Concentration	9.91102	392.594	27.8934	178.619	18.627	1.73158	3.38037	0.461719	0.599347
10	G-2	2010-03-12 22:55:00	Concentration	168.339	468.117	8.85599	318.063	11.4493	0.484456	30.6451	24.3956	1.82816
11	GSP-1	2010-03-12 23:14:00	Concentration	260.57	235.798	25.2097	545.252	26.712	2.08396	59.5113	96.5132	2.2577
12	BIR-1	2010-03-12 23:33:00	Concentration	2.02768	110.247	17.7309	17.1754	0.837163	0.710239	4.30432	-0.972487	-0.269816
13	BCR-1	2010-03-12 23:51:00	Concentration	48.6773	332.273	39.2886	197.417	12.0016	2.19551	15.4047	5.8811	1.69038
14	S-ORE	2010-03-13 00:10:00	Concentration	28.4839	115.189	17.7198	86.6634	5.44602	8.07088	238.493	7.28924	1.34896
15	JSd-1	2010-03-13 00:29:00	Concentration	66.2407	329.445	15.3423	125.644	11.0576	0.714944	13.0464	3.41725	1.1188
16	JSd-2	2010-03-13 00:48:00	Concentration	27.534	203.326	19.9848	114.946	4.23704	14.6275	150.223	3.96539	1.60707
17	JSd-3	2010-03-13 01:07:00	Concentration	281.212	56.8531	14.8641	127.527	7.52882	1.94963	81.0868	11.0457	1.55383
18	BE-N	2010-03-13 01:26:00	Concentration	44.3465	1374.41	29.6221	266.866	112.782	2.13124	4.179	10.4324	2.50741
19	JR-1	2010-03-13 01:44:00	Concentration	251.249	28.6919	45.7964	103.432	15.6	2.04784	18.4453	26.5321	8.31472
20	JR-2	2010-03-13 02:03:00	Concentration	296.568	8.82659	50.6745	99.0539	18.6256	1.93709	21.3192	31.4938	9.84123
21	JR-3	2010-03-13 02:22:00	Concentration	470.287	10.2121	174.065	1671.74	572.645	-0.251364	37.365	113.769	21.3814
22	MO=100	2010-03-13 02:41:00	Concentration	74.1973	58.0198	8.78449	97.2958	2.38938	101.426	10.1782	2.36637	1.00458
23	MO=90	2010-03-13 02:59:00	Concentration	73.8376	57.7608	8.88497	95.5831	2.44991	87.7586	10.1222	2.78995	1.24316
24	L49943 LOP 3871	2010-03-15 12:35:00	Concentration	45.4448	935.782	21.463	78.1328	8.13542	1.19043	6.75945	1.60301	1.32975
25	L49944 LOP 3871	2010-03-15 12:53:00	Concentration	2.28252	211.006	13.786	130.229	3.29963	3.62623	10.724	1.29531	1.18357
26	L49945 LOP 3871	2010-03-15 13:12:00	Concentration	58.0308	2174.36	20.9233	60.0353	2.80969	1.88401	8.29027	1.14888	1.84344
27	L49946 LOP 3871	2010-03-15 13:31:00	Concentration	43.2993	954.288	4.82721	54.5575	2.51289	6.39758	29.4634	-1.31548	0.691032
28	L49947 LOP 3871	2010-03-15 13:50:00	Concentration	17.953	419.449	17.559	46.1991	0.931211	2.23996	1.806	0.782447	0.597726
29	L49948 LOP 3871	2010-03-15 14:09:00	Concentration	58.2887	794.497	12.6943	60.8526	2.61992	0.952056	8.40821	0.079326	1.69224
30	L49949 LOP 3871	2010-03-15 14:27:00	Concentration	28.4962	1049.42	13.8671	51.7262	3.29761	1.04665	8.95597	1.72127	2.27144
31	L49950 LOP 3871	2010-03-15 14:46:00	Concentration	88.6095	1458.16	20.6374	65.4138	4.33125	0.954656	9.81617	0.738549	1.52441
32	L49951 LOP 3871	2010-03-15 15:05:00	Concentration	40.9248	1579.67	17.6068	43.8624	1.87669	1.69873	6.72411	1.20816	1.36594
33	L49952 LOP 3871	2010-03-15 15:24:00	Concentration	37.4855	1668.26	24.448	73.3874	5.1414	0.919911	7.81236	0.850593	1.41973
34	L49953 LOP 3871	2010-03-15 15:42:00	Concentration	65.917	432.933	24.9379	86.177	4.32521	1.95062	7.75465	1.25085	1.71306
35	L49954 LOP 3871	2010-03-15 16:01:00	Concentration	56.9416	1148.56	19.7069	90.5836	4.30407	0.912908	4.74064	0.276838	1.21689
36	L49955 LOP 3871	2010-03-15 16:20:00	Concentration	59.4077	1467.53	18.8488	75.0906	4.12922	0.473204	7.91747	0.659242	2.15922
37	L49956 LOP 3871	2010-03-15 16:39:00	Concentration	92.3056	139.473	11.9261	87.5186	3.97325	3.66968	14.5277	2.57347	2.01701
38	L49957 LOP 3871	2010-03-15 16:58:00	Concentration	43.0346	1256.66	14.4756	76.6306	4.30459	1.16029	11.1017	1.6209	2.17201
39	L49958 LOP 3871	2010-03-15 17:16:00	Concentration	43.7466	1089.32	16.2898	80.5745	4.16923	1.28849	11.577	1.9328	2.73945
40	L49959 LOP 3871	2010-03-15 17:35:00	Concentration	29.9827	1181.99	16.082	76.3614	3.92759	1.04703	8.39576	1.65565	1.85131
41	L49960 LOP 3871	2010-03-15 17:54:00	Concentration	53.3768	1721.84	15.3311	69.512	4.08997	1.25617	14.8018	1.23586	1.65012
42	L49961 LOP 3871	2010-03-15 18:13:00	Concentration	54.337	1769.21	15.1224	68.4664	4.03327	1.12656	12.9166	1.57809	1.91014
43	L49962 LOP 3871	2010-03-15 18:31:00	Concentration	50.168	269.115	27.5305	99.129	3.32008	1.57776	5.68892	0.693785	1.9127
44	L49963 LOP 3871	2010-03-15 18:50:00	Concentration	320.98	2115.53	16.33	53.4013	2.3288	1.22113	7.82792	0.838866	1.40361
45	L49997 LOP 3871	2010-03-15 19:09:00	Concentration	47.3774	939.057	4.02707	62.2416	2.80251	6.46664	43.8332	-0.335528	1.35353
46	L49998 LOP 3871	2010-03-15 19:28:00	Concentration	75.3822	962.755	10.8529	64.2018	2.91131	24.5787	159.504	0.900934	2.38904

## Sheet: axrht322 llds
2010-05-25 12:18:27
		Calculated off line by NGM
Results for - RHTHP
Selected archive:	RHTHP
Number of results selected:	RHT1
Seq.	Sample name	Meas. date/time	Result type	Rb	Sr	Y	Zr	Nb	Mo	Pb	Th	U
				Rb1	Sr1	Y1	Zr1	Nb1	Mo1	Pb1	Th2 (La1)	U
				(ppm)	(ppm)	(ppm)	(ppm)	(ppm)	(ppm)	(ppm)	(ppm)	(ppm)
1	Blank	2010-03-12 20:05:00	LLD	0.154173	0.147995	0.150048	0.120008	0.122566	0.114874	0.425587	0.342551	0.283701
2	AUSMONF	2010-03-12 20:24:00	LLD	0.442638	0.406484	0.406278	0.336387	0.354773	0.258782	1.16422	0.929365	0.762609
3	BCS313/1	2010-03-12 20:43:00	LLD	0.149993	0.145238	0.149291	0.119952	0.122719	0.115416	0.412628	0.334838	0.279769
4	NIM-G	2010-03-12 21:02:00	LLD	0.181637	0.176825	0.183812	0.147092	0.149251	0.135291	0.50098	0.40545	0.337803
5	MRG-1	2010-03-12 21:21:00	LLD	0.292823	0.277891	0.278767	0.219841	0.220305	0.199191	0.802719	0.645383	0.533851
6	MA-N	2010-03-12 21:40:00	LLD	0.204228	0.194561	0.183702	0.140536	0.13974	0.128122	0.549233	0.443875	0.369253
7	STM-1	2010-03-12 21:59:00	LLD	0.223826	0.21189	0.229188	0.179272	0.170336	0.150026	0.596439	0.486056	0.407941
8	PCC-1	2010-03-12 22:17:00	LLD	0.189045	0.181896	0.184782	0.147598	0.150397	0.139609	0.52144	0.421243	0.350274
9	BHVO-1	2010-03-12 22:36:00	LLD	0.265794	0.252096	0.252316	0.198631	0.198662	0.180169	0.718392	0.580493	0.482822
10	G-2	2010-03-12 22:55:00	LLD	0.201885	0.190929	0.193347	0.151967	0.150524	0.137829	0.53891	0.437843	0.366305
11	GSP-1	2010-03-12 23:14:00	LLD	0.209008	0.201416	0.210056	0.164905	0.162084	0.145613	0.570519	0.46226	0.385609
12	BIR-1	2010-03-12 23:33:00	LLD	0.250381	0.23925	0.2396	0.189446	0.191331	0.174924	0.692469	0.557965	0.462657
13	BCR-1	2010-03-12 23:51:00	LLD	0.261754	0.248244	0.249283	0.196376	0.196401	0.177818	0.712023	0.574767	0.477536
14	S-ORE	2010-03-13 00:10:00	LLD	0.375445	0.355975	0.355143	0.278294	0.278014	0.248964	1.04853	0.838132	0.688796
15	JSd-1	2010-03-13 00:29:00	LLD	0.202366	0.192405	0.192994	0.152453	0.153168	0.140849	0.546247	0.442646	0.369294
16	JSd-2	2010-03-13 00:48:00	LLD	0.237191	0.226137	0.227548	0.17969	0.180766	0.164916	0.652011	0.52431	0.433788
17	JSd-3	2010-03-13 01:07:00	LLD	0.188177	0.180169	0.183355	0.14545	0.146579	0.135224	0.516644	0.416053	0.344768
18	BE-N	2010-03-13 01:26:00	LLD	0.308179	0.286606	0.274892	0.212389	0.209014	0.187148	0.799772	0.651727	0.546959
19	JR-1	2010-03-13 01:44:00	LLD	0.171028	0.16535	0.169205	0.135143	0.137422	0.127047	0.468354	0.379393	0.316404
20	JR-2	2010-03-13 02:03:00	LLD	0.168929	0.163784	0.167673	0.133883	0.136178	0.125795	0.462215	0.37445	0.312308
21	JR-3	2010-03-13 02:22:00	LLD	0.210347	0.204952	0.233036	0.184773	0.17777	0.15333	0.592934	0.479493	0.399154
22	MO=100	2010-03-13 02:41:00	LLD	0.165384	0.159509	0.163834	0.13141	0.134012	0.124057	0.45402	0.367702	0.306582
23	MO=90	2010-03-13 02:59:00	LLD	0.165681	0.159794	0.163664	0.131036	0.133496	0.123638	0.453435	0.367181	0.306107
24	L49943 LOP 3871	2010-03-15 12:35:00	LLD	0.252884	0.236313	0.227439	0.176568	0.175189	0.158172	0.666051	0.54129	0.452982
25	L49944 LOP 3871	2010-03-15 12:53:00	LLD	0.217957	0.207614	0.208551	0.164787	0.165672	0.15071	0.596251	0.481596	0.400384
26	L49945 LOP 3871	2010-03-15 13:12:00	LLD	0.307836	0.282484	0.259162	0.196651	0.191504	0.170684	0.781701	0.639195	0.538361
27	L49946 LOP 3871	2010-03-15 13:31:00	LLD	0.207331	0.19283	0.1848	0.143938	0.143371	0.13107	0.541586	0.441925	0.371403
28	L49947 LOP 3871	2010-03-15 13:50:00	LLD	0.316542	0.299338	0.294696	0.230082	0.229288	0.205245	0.871671	0.700877	0.579806
29	L49948 LOP 3871	2010-03-15 14:09:00	LLD	0.231264	0.216723	0.210179	0.164158	0.163806	0.148902	0.608317	0.494142	0.413324
30	L49949 LOP 3871	2010-03-15 14:27:00	LLD	0.26103	0.243039	0.232262	0.180017	0.178497	0.161282	0.680164	0.551775	0.460885
31	L49950 LOP 3871	2010-03-15 14:46:00	LLD	0.280263	0.258941	0.242725	0.186368	0.183312	0.164373	0.726602	0.591455	0.495808
32	L49951 LOP 3871	2010-03-15 15:05:00	LLD	0.299391	0.277008	0.258639	0.198134	0.194908	0.174401	0.773872	0.630124	0.528391
33	L49952 LOP 3871	2010-03-15 15:24:00	LLD	0.281342	0.259596	0.241934	0.185229	0.181839	0.162942	0.722537	0.589563	0.495467
34	L49953 LOP 3871	2010-03-15 15:42:00	LLD	0.235903	0.22294	0.220576	0.173342	0.173623	0.157154	0.641575	0.517622	0.429808
35	L49954 LOP 3871	2010-03-15 16:01:00	LLD	0.260577	0.24251	0.231315	0.178796	0.176693	0.159169	0.682181	0.554686	0.464448
36	L49955 LOP 3871	2010-03-15 16:20:00	LLD	0.264666	0.244844	0.230332	0.177072	0.174258	0.156781	0.686164	0.558628	0.46837
37	L49956 LOP 3871	2010-03-15 16:39:00	LLD	0.235404	0.224979	0.225261	0.177407	0.178355	0.161234	0.655381	0.527479	0.43683
38	L49957 LOP 3871	2010-03-15 16:58:00	LLD	0.24502	0.227257	0.215105	0.166042	0.16405	0.148815	0.63378	0.516804	0.434026
39	L49958 LOP 3871	2010-03-15 17:16:00	LLD	0.243154	0.2261	0.215748	0.167284	0.165949	0.149925	0.634581	0.515904	0.431905
40	L49959 LOP 3871	2010-03-15 17:35:00	LLD	0.240993	0.224206	0.213167	0.164891	0.163285	0.147892	0.627229	0.511261	0.429195
41	L49960 LOP 3871	2010-03-15 17:54:00	LLD	0.266544	0.245363	0.229071	0.175437	0.1718	0.154507	0.680824	0.557974	0.471049
42	L49961 LOP 3871	2010-03-15 18:13:00	LLD	0.269565	0.247478	0.229468	0.175468	0.171857	0.154456	0.685979	0.560825	0.472269
43	L49962 LOP 3871	2010-03-15 18:31:00	LLD	0.206725	0.19789	0.198819	0.157167	0.158404	0.144548	0.566247	0.457562	0.380582
44	L49963 LOP 3871	2010-03-15 18:50:00	LLD	0.321809	0.295298	0.270384	0.204956	0.199598	0.177997	0.818077	0.66868	0.562969
45	L49997 LOP 3871	2010-03-15 19:09:00	LLD	0.205626	0.190963	0.183492	0.143136	0.142548	0.130366	0.533022	0.435576	0.366625
46	L49998 LOP 3871	2010-03-15 19:28:00	LLD	0.232521	0.215838	0.206813	0.160676	0.159686	0.144827	0.608262	0.494493	0.413969

## Sheet: axrht322 cse
2010-05-25 12:18:51
PANalytical
Results quantitative - RHT1
Selected archive:	RHT1
Number of results selected:	52
Seq.	Sample name (1-24)	Meas. date/time	Result type	Rb	Rb1Bg1 (kcps)	Sr	Sr1Bg1 (kcps)	Sr1Bg2 (kcps)	Y	Zr	Zr1Bg1 (kcps)	Nb	Mo	Mo1Bg1 (kcps)	Mo1Bg2 (kcps)	Pb	Pb1Bg1 (kcps)	Pb1Bg2 (kcps)	U	Th2	Rh3 (kcps)
				Rb1		Sr1			Y1	Zr1		Nb1	Mo1			Pb1			U1	Th2
				(kcps)		(kcps)			(kcps)	(kcps)		(kcps)	(kcps)			(kcps)			(kcps)	(kcps)
1	Blank	2010-03-12 20:05:00	CSE (kcps)	0.006	0.006	0.007	0.011	0.009	0.009	0.01	0.01	0.01	0.015	0.028	0.013	0.002	0.004	0.002	0.003	0.002	0.095
			CSE rel. (%)	0.327	0.698	0.272	0.348	0.408	0.229	0.194	0.208	0.13	0.134	0.138	0.151	0.421	0.438	0.701	0.327	0.382	0.041
2	AUSMONF	2010-03-12 20:24:00	CSE (kcps)	0.039	0.007	0.043	0.013	0.012	0.048	0.05	0.012	0.041	0.054	0.021	0.017	0.01	0.005	0.003	0.013	0.012	0.063
			CSE rel. (%)	0.051	0.516	0.047	0.292	0.319	0.042	0.04	0.17	0.03	0.037	0.185	0.115	0.086	0.364	0.558	0.063	0.069	0.061
3	BCS313/1	2010-03-12 20:43:00	CSE (kcps)	0.006	0.005	0.007	0.011	0.009	0.009	0.013	0.01	0.01	0.015	0.028	0.013	0.002	0.004	0.002	0.002	0.002	0.094
			CSE rel. (%)	0.337	0.739	0.271	0.355	0.422	0.23	0.152	0.21	0.13	0.134	0.138	0.151	0.425	0.447	0.747	0.335	0.397	0.041
4	NIM-G	2010-03-12 21:02:00	CSE (kcps)	0.021	0.005	0.008	0.01	0.009	0.02	0.026	0.009	0.013	0.014	0.025	0.012	0.002	0.003	0.002	0.003	0.003	0.083
			CSE rel. (%)	0.095	0.786	0.255	0.375	0.451	0.101	0.077	0.22	0.098	0.143	0.156	0.162	0.35	0.479	0.79	0.306	0.283	0.046
5	MRG-1	2010-03-12 21:21:00	CSE (kcps)	0.005	0.004	0.015	0.008	0.007	0.007	0.013	0.007	0.007	0.01	0.017	0.009	0.001	0.003	0.002	0.002	0.002	0.057
			CSE rel. (%)	0.425	1.024	0.131	0.509	0.583	0.292	0.15	0.305	0.168	0.203	0.221	0.229	0.588	0.633	1.007	0.474	0.547	0.067
6	MA-N	2010-03-12 21:40:00	CSE (kcps)	0.072	0.006	0.014	0.012	0.01	0.035	0.013	0.01	0.019	0.014	0.025	0.012	0.003	0.004	0.003	0.003	0.003	0.086
			CSE rel. (%)	0.028	0.686	0.138	0.323	0.369	0.056	0.153	0.21	0.066	0.144	0.151	0.161	0.315	0.406	0.664	0.252	0.304	0.045
7	STM-1	2010-03-12 21:59:00	CSE (kcps)	0.013	0.005	0.032	0.01	0.009	0.013	0.051	0.01	0.02	0.015	0.023	0.012	0.002	0.004	0.002	0.003	0.003	0.077
			CSE rel. (%)	0.158	0.8	0.063	0.379	0.428	0.157	0.039	0.203	0.062	0.137	0.167	0.17	0.405	0.466	0.797	0.327	0.329	0.05
8	PCC-1	2010-03-12 22:17:00	CSE (kcps)	0.005	0.005	0.006	0.009	0.008	0.007	0.009	0.008	0.008	0.012	0.023	0.011	0.002	0.003	0.002	0.002	0.002	0.078
			CSE rel. (%)	0.394	0.854	0.324	0.418	0.491	0.274	0.231	0.25	0.156	0.162	0.169	0.182	0.465	0.524	0.855	0.392	0.458	0.049
9	BHVO-1	2010-03-12 22:36:00	CSE (kcps)	0.005	0.004	0.02	0.008	0.007	0.008	0.017	0.007	0.008	0.011	0.019	0.009	0.001	0.003	0.002	0.002	0.002	0.063
			CSE rel. (%)	0.385	0.953	0.102	0.47	0.536	0.243	0.115	0.281	0.158	0.188	0.204	0.213	0.557	0.585	0.955	0.44	0.513	0.061
10	G-2	2010-03-12 22:55:00	CSE (kcps)	0.015	0.005	0.027	0.01	0.009	0.011	0.028	0.009	0.009	0.013	0.024	0.012	0.002	0.004	0.002	0.002	0.002	0.08
			CSE rel. (%)	0.131	0.772	0.074	0.381	0.432	0.18	0.072	0.224	0.133	0.15	0.162	0.172	0.371	0.472	0.794	0.35	0.339	0.048
11	GSP-1	2010-03-12 23:14:00	CSE (kcps)	0.018	0.005	0.019	0.01	0.008	0.013	0.033	0.009	0.01	0.013	0.022	0.011	0.003	0.003	0.002	0.002	0.003	0.076
			CSE rel. (%)	0.113	0.809	0.106	0.392	0.463	0.158	0.062	0.227	0.124	0.153	0.171	0.177	0.333	0.496	0.822	0.362	0.25	0.05
12	BIR-1	2010-03-12 23:33:00	CSE (kcps)	0.005	0.004	0.012	0.008	0.007	0.008	0.009	0.007	0.007	0.011	0.019	0.01	0.002	0.003	0.002	0.002	0.002	0.064
			CSE rel. (%)	0.44	0.947	0.173	0.469	0.545	0.264	0.216	0.284	0.179	0.189	0.2	0.21	0.544	0.584	0.94	0.44	0.512	0.06
13	BCR-1	2010-03-12 23:51:00	CSE (kcps)	0.008	0.004	0.018	0.008	0.007	0.009	0.018	0.007	0.008	0.011	0.019	0.01	0.002	0.003	0.002	0.002	0.002	0.064
			CSE rel. (%)	0.265	0.929	0.109	0.465	0.533	0.215	0.111	0.278	0.163	0.185	0.202	0.21	0.5	0.577	0.938	0.429	0.479	0.06
14	S-ORE	2010-03-13 00:10:00	CSE (kcps)	0.005	0.004	0.009	0.007	0.006	0.006	0.01	0.006	0.006	0.009	0.015	0.008	0.003	0.002	0.002	0.002	0.001	0.048
			CSE rel. (%)	0.399	1.088	0.225	0.574	0.665	0.321	0.201	0.349	0.217	0.228	0.259	0.264	0.322	0.714	1.101	0.529	0.579	0.081
15	JSd-1	2010-03-13 00:29:00	CSE (kcps)	0.01	0.005	0.022	0.01	0.008	0.01	0.019	0.008	0.009	0.013	0.023	0.011	0.002	0.003	0.002	0.002	0.002	0.078
			CSE rel. (%)	0.197	0.813	0.089	0.398	0.457	0.205	0.106	0.239	0.139	0.158	0.168	0.179	0.435	0.495	0.822	0.37	0.421	0.049
16	JSd-2	2010-03-13 00:48:00	CSE (kcps)	0.007	0.004	0.016	0.009	0.007	0.008	0.015	0.007	0.008	0.012	0.02	0.01	0.003	0.003	0.002	0.002	0.002	0.068
			CSE rel. (%)	0.299	0.88	0.128	0.448	0.521	0.238	0.129	0.27	0.166	0.162	0.192	0.201	0.279	0.563	0.896	0.416	0.47	0.057
17	JSd-3	2010-03-13 01:07:00	CSE (kcps)	0.019	0.005	0.011	0.01	0.008	0.013	0.018	0.009	0.009	0.013	0.024	0.012	0.003	0.003	0.002	0.002	0.002	0.081
			CSE rel. (%)	0.103	0.78	0.178	0.391	0.458	0.157	0.109	0.233	0.138	0.151	0.162	0.173	0.291	0.493	0.792	0.36	0.378	0.048
18	BE-N	2010-03-13 01:26:00	CSE (kcps)	0.007	0.004	0.035	0.009	0.008	0.009	0.022	0.007	0.012	0.011	0.018	0.009	0.002	0.003	0.002	0.002	0.002	0.061
			CSE rel. (%)	0.27	0.935	0.057	0.447	0.485	0.229	0.09	0.275	0.107	0.188	0.208	0.214	0.538	0.544	0.93	0.412	0.459	0.063
19	JR-1	2010-03-13 01:44:00	CSE (kcps)	0.02	0.005	0.01	0.01	0.009	0.015	0.018	0.009	0.01	0.014	0.026	0.012	0.002	0.004	0.002	0.003	0.003	0.087
			CSE rel. (%)	0.102	0.769	0.206	0.37	0.438	0.133	0.111	0.22	0.121	0.14	0.15	0.161	0.386	0.469	0.776	0.318	0.317	0.044
20	JR-2	2010-03-13 02:03:00	CSE (kcps)	0.021	0.005	0.008	0.01	0.009	0.016	0.018	0.009	0.011	0.014	0.026	0.013	0.002	0.004	0.002	0.003	0.003	0.087
			CSE rel. (%)	0.094	0.771	0.257	0.366	0.436	0.125	0.113	0.218	0.117	0.14	0.149	0.159	0.375	0.466	0.773	0.311	0.304	0.044
21	JR-3	2010-03-13 02:22:00	CSE (kcps)	0.024	0.005	0.008	0.01	0.009	0.021	0.055	0.01	0.029	0.015	0.024	0.013	0.002	0.004	0.002	0.003	0.004	0.077
			CSE rel. (%)	0.085	0.769	0.265	0.373	0.45	0.096	0.036	0.195	0.044	0.136	0.163	0.159	0.354	0.468	0.768	0.292	0.229	0.05
22	MO=100	2010-03-13 02:41:00	CSE (kcps)	0.012	0.005	0.012	0.01	0.009	0.01	0.018	0.009	0.009	0.024	0.026	0.013	0.002	0.004	0.002	0.002	0.002	0.089
			CSE rel. (%)	0.169	0.758	0.163	0.368	0.434	0.192	0.11	0.217	0.132	0.084	0.147	0.158	0.409	0.463	0.766	0.343	0.391	0.043
23	MO=90	2010-03-13 02:59:00	CSE (kcps)	0.012	0.005	0.012	0.011	0.009	0.01	0.018	0.009	0.009	0.023	0.026	0.013	0.002	0.004	0.002	0.002	0.002	0.089
			CSE rel. (%)	0.169	0.754	0.163	0.366	0.432	0.191	0.111	0.217	0.132	0.088	0.147	0.158	0.408	0.462	0.764	0.341	0.389	0.043
24	L49943 LOP 3871	2010-03-15 12:35:00	CSE (kcps)	0.008	0.004	0.033	0.009	0.008	0.009	0.017	0.008	0.008	0.011	0.02	0.01	0.002	0.003	0.002	0.002	0.002	0.07
			CSE rel. (%)	0.241	0.859	0.06	0.413	0.453	0.217	0.114	0.254	0.155	0.174	0.188	0.195	0.48	0.503	0.848	0.381	0.448	0.055
25	L49944 LOP 3871	2010-03-15 12:53:00	CSE (kcps)	0.005	0.004	0.017	0.009	0.008	0.008	0.017	0.008	0.008	0.012	0.021	0.011	0.002	0.003	0.002	0.002	0.002	0.073
			CSE rel. (%)	0.39	0.861	0.117	0.422	0.486	0.243	0.115	0.253	0.157	0.165	0.181	0.189	0.466	0.524	0.854	0.39	0.453	0.053
26	L49945 LOP 3871	2010-03-15 13:12:00	CSE (kcps)	0.009	0.004	0.047	0.01	0.009	0.009	0.02	0.008	0.007	0.011	0.019	0.01	0.002	0.003	0.002	0.002	0.002	0.066
			CSE rel. (%)	0.225	0.863	0.043	0.4	0.419	0.218	0.099	0.255	0.168	0.18	0.198	0.203	0.472	0.478	0.835	0.37	0.446	0.059
27	L49946 LOP 3871	2010-03-15 13:31:00	CSE (kcps)	0.01	0.005	0.04	0.011	0.01	0.009	0.02	0.009	0.009	0.014	0.024	0.012	0.002	0.004	0.002	0.003	0.002	0.083
			CSE rel. (%)	0.207	0.747	0.05	0.358	0.389	0.213	0.102	0.221	0.14	0.142	0.159	0.168	0.354	0.432	0.745	0.33	0.399	0.046
28	L49947 LOP 3871	2010-03-15 13:50:00	CSE (kcps)	0.005	0.004	0.018	0.008	0.007	0.007	0.011	0.007	0.006	0.01	0.017	0.009	0.001	0.003	0.002	0.002	0.002	0.056
			CSE rel. (%)	0.377	1.001	0.11	0.499	0.567	0.282	0.18	0.305	0.197	0.209	0.227	0.232	0.587	0.614	0.977	0.462	0.533	0.069
29	L49948 LOP 3871	2010-03-15 14:09:00	CSE (kcps)	0.009	0.005	0.032	0.01	0.009	0.009	0.017	0.008	0.008	0.012	0.022	0.011	0.002	0.003	0.002	0.002	0.002	0.074
			CSE rel. (%)	0.213	0.84	0.062	0.402	0.444	0.218	0.118	0.246	0.156	0.166	0.178	0.187	0.462	0.494	0.831	0.372	0.444	0.052
30	L49949 LOP 3871	2010-03-15 14:27:00	CSE (kcps)	0.007	0.004	0.034	0.009	0.008	0.008	0.017	0.008	0.008	0.011	0.02	0.01	0.002	0.003	0.002	0.002	0.002	0.069
			CSE rel. (%)	0.276	0.866	0.058	0.416	0.453	0.238	0.121	0.258	0.164	0.177	0.19	0.198	0.478	0.511	0.853	0.385	0.455	0.056
31	L49950 LOP 3871	2010-03-15 14:46:00	CSE (kcps)	0.01	0.004	0.04	0.009	0.009	0.01	0.018	0.008	0.008	0.011	0.02	0.01	0.002	0.003	0.002	0.002	0.002	0.068
			CSE rel. (%)	0.194	0.861	0.05	0.407	0.434	0.21	0.108	0.255	0.163	0.178	0.193	0.199	0.464	0.489	0.832	0.374	0.446	0.057
32	L49951 LOP 3871	2010-03-15 15:05:00	CSE (kcps)	0.008	0.004	0.039	0.009	0.009	0.008	0.017	0.008	0.007	0.011	0.019	0.01	0.002	0.003	0.002	0.002	0.002	0.064
			CSE rel. (%)	0.26	0.891	0.051	0.421	0.451	0.236	0.116	0.266	0.174	0.185	0.202	0.208	0.496	0.509	0.868	0.391	0.465	0.06
33	L49952 LOP 3871	2010-03-15 15:24:00	CSE (kcps)	0.008	0.005	0.043	0.01	0.009	0.009	0.02	0.008	0.008	0.011	0.02	0.01	0.002	0.003	0.002	0.002	0.002	0.068
			CSE rel. (%)	0.25	0.851	0.047	0.399	0.424	0.214	0.102	0.252	0.161	0.176	0.191	0.197	0.468	0.48	0.829	0.37	0.443	0.056
34	L49953 LOP 3871	2010-03-15 15:42:00	CSE (kcps)	0.009	0.004	0.023	0.009	0.008	0.009	0.016	0.008	0.008	0.011	0.02	0.01	0.002	0.003	0.002	0.002	0.002	0.07
			CSE rel. (%)	0.217	0.876	0.087	0.43	0.486	0.211	0.128	0.26	0.161	0.174	0.189	0.196	0.485	0.529	0.858	0.394	0.459	0.055
35	L49954 LOP 3871	2010-03-15 16:01:00	CSE (kcps)	0.009	0.005	0.036	0.009	0.009	0.009	0.019	0.008	0.008	0.012	0.02	0.01	0.002	0.003	0.002	0.002	0.002	0.07
			CSE rel. (%)	0.223	0.852	0.055	0.406	0.441	0.215	0.107	0.252	0.16	0.174	0.188	0.195	0.481	0.493	0.834	0.376	0.448	0.055
36	L49955 LOP 3871	2010-03-15 16:20:00	CSE (kcps)	0.009	0.005	0.042	0.01	0.009	0.01	0.02	0.008	0.008	0.012	0.021	0.01	0.002	0.004	0.002	0.002	0.002	0.071
			CSE rel. (%)	0.213	0.83	0.048	0.392	0.419	0.21	0.102	0.245	0.157	0.171	0.184	0.191	0.455	0.472	0.805	0.36	0.432	0.054
37	L49956 LOP 3871	2010-03-15 16:39:00	CSE (kcps)	0.01	0.004	0.014	0.009	0.008	0.009	0.014	0.008	0.008	0.012	0.02	0.01	0.002	0.003	0.002	0.002	0.002	0.069
			CSE rel. (%)	0.196	0.869	0.147	0.434	0.506	0.225	0.141	0.264	0.163	0.173	0.19	0.197	0.464	0.539	0.862	0.396	0.455	0.056
38	L49957 LOP 3871	2010-03-15 16:58:00	CSE (kcps)	0.009	0.005	0.04	0.01	0.009	0.009	0.02	0.008	0.008	0.012	0.022	0.011	0.002	0.004	0.002	0.002	0.002	0.074
			CSE rel. (%)	0.228	0.818	0.049	0.386	0.415	0.216	0.101	0.24	0.153	0.164	0.177	0.186	0.438	0.467	0.803	0.355	0.423	0.052
39	L49958 LOP 3871	2010-03-15 17:16:00	CSE (kcps)	0.009	0.005	0.038	0.01	0.009	0.009	0.019	0.008	0.008	0.012	0.022	0.011	0.002	0.004	0.002	0.002	0.002	0.074
			CSE rel. (%)	0.23	0.815	0.053	0.391	0.424	0.214	0.104	0.242	0.153	0.165	0.179	0.186	0.439	0.475	0.803	0.357	0.424	0.052
40	L49959 LOP 3871	2010-03-15 17:35:00	CSE (kcps)	0.008	0.005	0.039	0.01	0.009	0.009	0.02	0.008	0.008	0.012	0.022	0.011	0.002	0.004	0.002	0.002	0.002	0.074
			CSE rel. (%)	0.252	0.82	0.051	0.386	0.418	0.216	0.102	0.24	0.152	0.164	0.177	0.185	0.446	0.468	0.802	0.355	0.422	0.052
41	L49960 LOP 3871	2010-03-15 17:54:00	CSE (kcps)	0.009	0.005	0.046	0.01	0.009	0.009	0.021	0.008	0.008	0.012	0.021	0.011	0.002	0.004	0.002	0.002	0.002	0.072
			CSE rel. (%)	0.217	0.823	0.044	0.385	0.406	0.213	0.097	0.241	0.156	0.168	0.183	0.19	0.43	0.458	0.81	0.353	0.424	0.054
42	L49961 LOP 3871	2010-03-15 18:13:00	CSE (kcps)	0.009	0.005	0.046	0.01	0.01	0.009	0.021	0.008	0.008	0.012	0.021	0.011	0.002	0.004	0.002	0.002	0.002	0.072
			CSE rel. (%)	0.214	0.814	0.043	0.382	0.401	0.213	0.096	0.241	0.155	0.168	0.183	0.19	0.432	0.457	0.797	0.351	0.421	0.054
43	L49962 LOP 3871	2010-03-15 18:31:00	CSE (kcps)	0.009	0.005	0.02	0.009	0.008	0.01	0.017	0.008	0.008	0.012	0.022	0.011	0.002	0.003	0.002	0.002	0.002	0.075
			CSE rel. (%)	0.227	0.855	0.102	0.414	0.481	0.2	0.12	0.249	0.154	0.164	0.177	0.185	0.48	0.517	0.845	0.382	0.45	0.051
44	L49963 LOP 3871	2010-03-15 18:50:00	CSE (kcps)	0.016	0.004	0.045	0.009	0.009	0.011	0.019	0.008	0.007	0.011	0.019	0.009	0.002	0.003	0.002	0.002	0.002	0.063
			CSE rel. (%)	0.122	0.888	0.045	0.414	0.433	0.183	0.106	0.265	0.176	0.188	0.205	0.211	0.487	0.495	0.862	0.381	0.456	0.061
45	L49997 LOP 3871	2010-03-15 19:09:00	CSE (kcps)	0.01	0.005	0.04	0.011	0.01	0.009	0.02	0.009	0.009	0.014	0.024	0.012	0.003	0.004	0.002	0.003	0.002	0.084
			CSE rel. (%)	0.2	0.745	0.05	0.358	0.388	0.212	0.1	0.219	0.139	0.141	0.158	0.167	0.327	0.432	0.752	0.328	0.396	0.046
46	L49998 LOP 3871	2010-03-15 19:28:00	CSE (kcps)	0.011	0.005	0.036	0.01	0.009	0.01	0.018	0.008	0.008	0.015	0.022	0.011	0.003	0.004	0.002	0.002	0.002	0.076
			CSE rel. (%)	0.187	0.763	0.055	0.384	0.419	0.208	0.109	0.237	0.151	0.136	0.173	0.181	0.241	0.466	0.788	0.35	0.418	0.051

[truncated: 12 more sheets: axrht323, axrht323 llds, axrht323 cse, axrht324, axrht324 llds, axrht324 cse, axrht325, axrht325 llds, axrht325 cse, axrht326, axrht326 llds, axrht326 cse]
