# Supplementary material for: The Petrology & Geochemistry of REE-Enriched, Alkaline Vol-Canic Rocks of Ambitle Island, Feni Island Group, Papua New Guinea
Source: Preprints.org preprint supplement (doi:10.20944/preprints202306.0971.v1), 2023-06-14
Supplement: Supplementary file 10 [file FeniSoloNBT_cleaned.xlsx]

## Sheet: Sheet1
[Colour]	[Shape]	[Size]	[Visible]	[Order]	SAMPLE NO.	Sample #	Lithology	Origin	Locality	Arc	100K	SampleType	Lab	Lab Batch No	Date Received	Date Reported	SiO2_pct	Al2O3_pct	CaO_pct	Cr2O3_pct	SO3_pct	Fe2O3_pct	K2O_pct	MgO_pct	MnO_pct	Na2O_pct	P2O5_pct	TiO2_pct	LOI_pct	Total_pct	Ba_ppm	Ce_ppm	Dy_ppm	Er_ppm	Eu_ppm	Ga_ppm	Gd_ppm	Hf_ppm	Ho_ppm	La_ppm	Lu_ppm	Nb_ppm	Nd_ppm	Pr_ppm	Rb_ppm	Sc_ppm	Sm_ppm	Sn_ppm	Sr_ppm
Solomon Arc	Default Shape	Default Size	Y	0	GG1	GG1	Dacite	Gallego_ Guadalcanal_ Solomon Islands	Gallego	Solomon Arc		Float	OMAC Ireland	09L016	40161	40182	58.0953	17.7609	5.46947	0.003526		4.38279	1.26588	2.31311	0.076422	5.02811	0.147557	0.393785	0.339864	95.2766	415.782	12.2322	1.27552	0.814399	0.636659	18.4456	1.55575	1.82329	0.274028	5.71918	0.128947	1.2977	8.256	1.68241	20.8966	10.3746	1.6296	1.5278	849.364
Solomon Arc	Default Shape	Default Size	Y	1	GG2	GG2	Andesite	Gallego_ Guadalcanal_ Solomon Islands	Gallego	Solomon Arc		Float	OMAC Ireland	09L016	40161	40182	60.9625	17.9964	5.48706	0.003184		4.01268	1.3308	2.30405	0.066586	5.2133	0.138282	0.361117	0.460645	98.3366	426.564	12.0265	1.25816	0.693106	0.590255	18.8778	1.47519	1.88881	0.248176	5.38319	0.101316	1.1172	7.966	1.71899	22.7946	10.0651	1.66534	1.40802	856.605
Solomon Arc	Default Shape	Default Size	Y	2	GG4	GG4	Dacite	Gallego_ Guadalcanal_ Solomon Islands	Gallego	Solomon Arc		Float	OMAC Ireland	09L016	40161	40182	57.2277	18.0948	7.63666	0.01447		6.49933	1.41979	3.50301	0.136128	3.75232	0.157244	0.365851	1.51848	100.326	316.838	9.87057	1.68334	1.03966	0.553132	18.3485	1.50205	1.28978	0.334349	4.32071	0.175	0.6327	6.856	1.38068	19.0929	15.9504	1.45092	1.44795	623.399
Solomon Arc	Default Shape	Default Size	Y	3	GG5	GG5	Dacite	Gallego_ Guadalcanal_ Solomon Islands	Gallego	Solomon Arc		Float	OMAC Ireland	09L016	40161	40182	59.546	18.6268	5.42555	0.001779		4.53865	1.3863	2.31782	0.080881	5.42605	0.18717	0.402539	1.0617	99.0013	453.131	15.1306	1.51847	0.875046	0.692343	20.5978	1.83325	2.27257	0.282645	6.94511	0.138158	1.5922	9.956	2.04816	25.1994	8.76425	2.03164	1.22171	915.116
Solomon Arc	Default Shape	Default Size	Y	4	GG6	GG6	Andesite	Gallego_ Guadalcanal_ Solomon Islands	Gallego	Solomon Arc		Float	OMAC Ireland	09L016	40161	40182	54.0729	18.9846	7.93648	0.001537		6.55661	1.11503	3.32312	0.128179	4.31725	0.179444	0.477689	0.801282	97.8941	293.868	12.2769	1.7354	1.08298	0.738747	18.9836	1.85115	1.62674	0.342966	5.16524	0.175	0.7847	9.136	1.75556	15.4031	14.3289	2.00484	1.27494	767.858
Solomon Arc	Default Shape	Default Size	Y	5	GG7	GG7	Andesite	Gallego_ Guadalcanal_ Solomon Islands	Gallego	Solomon Arc		Float	OMAC Ireland	09L016	40161	40182	53.3488	18.2772	7.95095	0.001788		6.40602	1.10242	3.36749	0.127121	4.23294	0.194336	0.478246	0.239521	95.7268	289.792	14.6475	1.79614	1.11763	0.803712	19.9274	2.11969	1.61738	0.394669	6.42749	0.175	0.8987	10.266	2.13959	16.8531	14.1821	2.11205	1.06201	802.385
Solomon Arc	Default Shape	Default Size	Y	6	GG8	GG8	Plag & Hbl Xeno	Gallego_ Guadalcanal_ Solomon Islands	Gallego	Solomon Arc		Float	OMAC Ireland	09L016	40161	40182	48.0738	18.6976	12.1786	0.00688		7.0668	0.274691	6.8533	0.165832	2.56016	0.015842	0.1693	0.857941	96.9208	58.4284	2.57096	0.885054	0.571812	0.413921	15.2437	0.669565		0.20509	0.960764			2.116	0.393173	2.50627	34.294	0.557496		483.406
Solomon Arc	Default Shape	Default Size	Y	7	GG9	GG9	Dacite	Gallego_ Guadalcanal_ Solomon Islands	Gallego	Solomon Arc		Float	OMAC Ireland	09L016	40161	40182	58.0655	18.147	6.0149	0.004391		5.08709	1.26122	2.70974	0.08108	5.11536	0.151525	0.427263	0.48048	97.5456	397.586	12.4111	1.46641	0.909701	0.618097	19.5834	1.70793	1.97305	0.274028	5.58296	0.138158	1.2027	8.786	1.77385	21.0263	12.3049	1.69214		878.235
Solomon Arc	Default Shape	Default Size	Y	8	GG12	GG12	Dacite	Gallego_ Guadalcanal_ Solomon Islands	Gallego	Solomon Arc		Float	OMAC Ireland	09L016	40161	40182	55.0885	18.8385	8.03314	0.002175		7.04249	1.1154	3.38035	0.13244	4.13949	0.171604	0.488998	0.740889	99.174	279.171	13.5025	1.70937	1.07431	0.77587	19.5217	1.90486	1.64546	0.3602	5.80091	0.175	0.8797	9.646	1.92929	16.8413	15.118	2.03164	1.19509	765.76
Solomon Arc	Default Shape	Default Size	Y	9	GG13	GG13	Dacite	Gallego_ Guadalcanal_ Solomon Islands	Gallego	Solomon Arc		Float	OMAC Ireland	09L016	40161	40182	54.371	17.8512	7.39532	0.003708		6.76848	1.10929	3.6542	0.125808	4.07616	0.208522	0.641328	0.819508	97.0246	412.286	20.6947	2.65516	1.55949	1.11926	18.8601	2.73734	1.90753	0.523928	9.61491	0.230263	3.0362	12.946	2.78878	13.7055	17.6037	2.79105	1.0487	898.384
Solomon Arc	Default Shape	Default Size	Y	10	GG14	GG14	Dacite	Gallego_ Guadalcanal_ Solomon Islands	Gallego	Solomon Arc		Float	OMAC Ireland	09L016	40161	40182	56.1542	18.1312	6.73502	0.007084		6.6698	1.04867	3.32463	0.133146	4.00888	0.211736	0.677662	1.48416	98.5862	319.363	20.0149	2.64648	1.59414	0.980046	17.784	2.84476	2.08537	0.558397	9.73296	0.239474	3.1692	13.526	2.80707	14.2478	16.0051	2.78212		609.733
Solomon Arc	Default Shape	Default Size	Y	11	GG15	GG15	Dacite	Gallego_ Guadalcanal_ Solomon Islands	Gallego	Solomon Arc		Float	OMAC Ireland	09L016	40161	40182	61.1829	16.6914	5.89954	0.008167		4.50214	1.10595	2.77745	0.097399	4.36891	0.118399	0.391652	0.340204	97.4842	329.231	9.2891	1.52715	0.970348	0.618097	15.7818	1.51995	1.72034	0.308497	4.02104	0.156579	1.2027	6.346	1.2801	17.6075	11.9578	1.45985		525.674
Solomon Arc	Default Shape	Default Size	Y	12	GG16	GG16	Dacite	Gallego_ Guadalcanal_ Solomon Islands	Gallego	Solomon Arc		Float	OMAC Ireland	09L016	40161	40182	58.6046	18.023	6.49546	0.008332		5.5913	1.1552	2.97118	0.101898	4.09632	0.150573	0.483908	0.80048	98.4823	355.856	12.1159	2.09116	1.25625	0.65522	17.44	1.86905	1.94497	0.386052	5.3287	0.211842	1.3262	7.696	1.61841	18.5035	15.0878	1.82615		557.693
Solomon Arc	Default Shape	Default Size	Y	13	GG18	GG18	Dacite	Gallego_ Guadalcanal_ Solomon Islands	Gallego	Solomon Arc		Float	OMAC Ireland	09L016	40161	40182	57.9573	18.3428	6.59909	0.005598		5.50224	0.967319	2.90639	0.119229	4.15052	0.170793	0.504095	0.839832	98.0652	288.577	17.4654	2.35147	1.4122	0.887239	18.225	2.4509	1.88881	0.480842	8.38898	0.239474	1.8107	11.766	2.45047	16.0514	13.6455	2.3086		646.393
Solomon Arc	Default Shape	Default Size	Y	14	GG21	GG21	Ultramafic (hornblendite?)	Gallego_ Guadalcanal_ Solomon Islands	Gallego	Solomon Arc		Float	OMAC Ireland	09L016	40161	40182	44.6975	15.5861	13.604	0.009435		12.5696	1.58279	6.7518	0.189385	1.64972	0.331921	1.0949	1.86522	99.9325	172.486	26.9209	3.86994	1.95802	1.58329	14.688	4.52762	1.52378	0.747976	12.1757	0.267105	1.0792	20.446	3.87687	39.9942	55.0476	4.72978		775.962
Solomon Arc	Default Shape	Default Size	Y	15	GG22	GG22	Ultramafic (hornblendite?)	Gallego_ Guadalcanal_ Solomon Islands	Gallego	Solomon Arc		Float	OMAC Ireland	09L016	40161	40182	44.2025	15.3856	13.5919	0.01049		12.8918	1.53387	6.81382	0.190126	1.60758	0.328937	1.14056	1.90381	99.601	158.099	27.1445	4.04348	2.1313	1.58329	15.1114	4.82302	1.62674	0.76521	12.1939	0.285526	1.0602	20.416	3.93173	39.7467	56.1221	4.89059		794.234
Solomon Arc	Default Shape	Default Size	Y	16	GG24	GG24	Hematised Andesite	Gallego_ Guadalcanal_ Solomon Islands	Gallego	Solomon Arc		Float	OMAC Ireland	09L016	40161	40182	57.3051	19.0395	6.84476	0.002694		6.15268	1.19336	3.09916	0.122947	4.41734	0.113283	0.444471	0.639105	99.3744	332.717	13.6009	1.50112	0.866382	0.673782	19.5481	1.79744	1.65482	0.317114	5.85539	0.147368	1.0032	9.066	1.83785	17.525	15.1107	1.83509		766.552
Solomon Arc	Default Shape	Default Size	Y	17	GG25	GG25	Hematised Andesite	Gallego_ Guadalcanal_ Solomon Islands	Gallego	Solomon Arc		Float	OMAC Ireland	09L016	40161	40182	57.2106	17.7698	6.63544	0.005586		5.97966	0.999514	3.11364	0.117434	4.1708	0.140642	0.561524	0.8182	97.5229	316.132	13.2788	2.08248	1.23026	0.812993	17.5018	2.18235	1.75778	0.429138	5.61021	0.202632	1.8867	9.136	1.85614	14.236	17.0318	2.11205		628.984
Solomon Arc	Default Shape	Default Size	Y	18	GG26	GG26	Mafic?	Gallego_ Guadalcanal_ Solomon Islands	Gallego	Solomon Arc		Float	OMAC Ireland	09L016	40161	40182	53.8109	18.3189	8.18542	0.002315		7.62047	0.56562	3.51513	0.166445	3.79147	0.172677	0.897359	1.09846	98.1451	159.822	19.2992	4.1129	2.50384	1.1471	17.6076	3.82941	2.78735	0.868617	8.05298	0.414474	2.5992	13.756	2.73392	9.28475	16.1544	3.39858		426.083
Solomon Arc	Default Shape	Default Size	Y	19	GG27	GG27	Mafic?	Gallego_ Guadalcanal_ Solomon Islands	Gallego	Solomon Arc		Float	OMAC Ireland	09L016	40161	40182	53.0406	17.9694	8.04663	0.002052		7.05612	0.684056	2.99191	0.144616	3.55446	0.153178	0.846432	1.79892	96.2884	164.514	14.8354	3.84391	2.45186	1.09142	17.5106	3.56087	2.34744	0.816914	6.08242	0.396053	1.5827	12.116	2.30418	10.3339	15.4454	3.23776		418.633
Solomon Arc	Default Shape	Default Size	Y	20	GG28	GG28	Dacite	Gallego_ Guadalcanal_ Solomon Islands	Gallego	Solomon Arc		Float	OMAC Ireland	09L016	40161	40182	56.9167	17.941	8.04939	0.002758		6.60101	0.962498	3.927	0.130775	3.83436	0.138935	0.615595	0.720288	99.8404	264.042	12.0354	2.6031	1.44686	0.785151	16.6991	2.20921	1.78585	0.532545	5.15616	0.239474	1.3547	8.936	1.74642	14.5779	18.1005	2.04058		548.283
Solomon Arc	Default Shape	Default Size	Y	21	GG29	GG29	Mafic?	Gallego_ Guadalcanal_ Solomon Islands	Gallego	Solomon Arc		Float	OMAC Ireland	09L016	40161	40182	50.1761	18.1853	8.515	0.00775		9.87151	0.792574	5.27382	0.190969	2.87674	0.144524	0.720543	1.80108	98.556	153.074	13.1625	2.79399	1.7241	0.924362	16.9196	2.71944	1.27106	0.644569	5.93712	0.276316	0.5187	10.826	2.00244	11.5364	28.9695	2.48729		494.623
Solomon Arc	Default Shape	Default Size	Y	22	GG30	GG30	Andesite/Dacite	Gallego_ Guadalcanal_ Solomon Islands	Gallego	Solomon Arc		Float	OMAC Ireland	09L016	40161	40182	52.3171	19.3408	9.3158	0.001453		7.836	1.08276	2.78154	0.151861	3.59799	0.183613	0.770103	1.78392	99.163	253.743	22.0097	3.72243	2.23527	1.28631	18.1721	3.71304	1.79521	0.756593	10.8953	0.313158	1.3832	17.286	3.39226	17.4779	15.6225	3.59513		621.009
Solomon Arc	Default Shape	Default Size	Y	23	GG31	GG31	Andesite	Gallego_ Guadalcanal_ Solomon Islands	Gallego	Solomon Arc		Float	OMAC Ireland	09L016	40161	40182	53.2968	19.7642	9.26547	0.002945		7.57127	0.85418	3.91153	0.145336	3.68759	0.153691	0.54202	0.679864	99.8749	252.584	10.3178	2.21263	1.36888	0.803712	18.1721	2.26292	1.33658	0.463607	4.68395	0.221053	0.9842	8.636	1.68241	10.4165	20.7584	2.07631		611.016
Solomon Arc	Default Shape	Default Size	Y	24	GG33	GG33	Plag & Hbl Xeno	Gallego_ Guadalcanal_ Solomon Islands	Gallego	Solomon Arc		Float	OMAC Ireland	09L016	40161	40182	41.7082	23.0169	12.8188	0.004232		11.3143	0.126647	5.77673	0.124039	1.71391	0.041922	0.796391	1.4565	98.8985	55.9718	6.5607	2.81135	1.5335	1.04501	21.9209	2.87161		0.532545	2.68614	0.193421	1.4022	8.486	1.38982	0.973743	18.982	2.46942		563.593
Solomon Arc	Default Shape	Default Size	Y	25	GG34	GG34	Mafic Xeno	Gallego_ Guadalcanal_ Solomon Islands	Gallego	Solomon Arc		Float	OMAC Ireland	09L016	40161	40182	42.7733	25.791	15.0339	<0.001		6.1659	0.108342	6.14635	0.067824	1.16233	0.016383	0.562908	1.13909	98.9674	31.9477	3.55498	1.66598	0.892373	0.692343	16.9461	1.66317		0.334349	1.28768	0.119737	0.7467	4.616	0.722341	1.00911	24.6482	1.30797		503.24
Solomon Arc	Default Shape	Default Size	Y	26	GG35-A	GG35-A	Andesite/Dacite	Gallego_ Guadalcanal_ Solomon Islands	Gallego	Solomon Arc		Float	OMAC Ireland	09L016	40161	40182	55.57	18.8137	7.67321	0.002509		6.10824	1.06701	3.38144	0.117212	4.15557	0.162782	0.45766	0.59976	98.1092	304.399	13.4309	1.65731	1.07431	0.710905	18.0486	1.95857	1.64546	0.351583	5.80999	0.184211	0.9177	9.546	1.92929	15.3913	15.8824	1.92443		755.172
TLTF	Default Shape	Default Size	Y	27	F4	F4	Hornblende Andesite	Feni Island	Feni	TLTF	Feni	Float	OMAC Ireland	09L016	40161	40182	46.7339	9.33227	16.6065	0.022278		9.55176	1.47352	10.3189	0.156468	1.93974	0.243959	0.648789	0.861551	97.8897	124.185	21.1778	2.50765	1.16095	1.25847	10.7893	3.56982	1.42082	0.446373	9.34248	0.156579	0.9272	17.046	3.13624	23.7376	61.3118	3.74701		792.1
TLTF	Default Shape	Default Size	Y	28	F5	F5	Hornblende Basaltic Andesite	Waramung beach_ Feni Island	Feni	TLTF	Feni	Float	OMAC Ireland	09L016	40161	40182	48.2873	15.3004	11.4897	0.006931		10.5938	2.44125	6.40772	0.185393	3.45861	0.510587	0.935296	0.359856	99.9769	151.848	34.6141	3.90465	1.97535	1.83387	16.4433	5.29744	2.08537	0.739359	15.1634	0.276316	2.2857	25.516	5.08382	45.3816	32.1984	5.56959		1301
TLTF	Default Shape	Default Size	Y	29	F6	F6	Hornblende Basaltic Andesite	Waramung beach_ Feni Island	Feni	TLTF	Feni	Float	OMAC Ireland	09L016	40161	40182	49.1115	17.8145	9.04192	0.002075		9.78807	3.73362	3.82779	0.202703	4.70058	0.640572	0.779755	2.9535	102.597	336.757	46.7711	4.02613	1.95802	2.05661	19.3717	6.03146	2.30064	0.722124	22.4281	0.257895	2.8462	31.516	6.47364	40.23	12.1244	6.44515	1.34148	2790.43
TLTF	Default Shape	Default Size	Y	30	F7	F7	Basalt	Waramung beach_ Feni Island	Feni	TLTF	Feni	Float	OMAC Ireland	09L016	40161	40182	44.7764	14.185	12.8364	0.006602		10.4045	1.98071	7.327	0.191034	1.74456	0.384468	1.02389	3.53505	98.3956	153.2	31.1879	4.16496	2.10531	1.76891	14.8115	5.01995	2.11345	0.791062	14.4278	0.322368	2.4947	22.916	4.44377	36.5873	32.7458	5.03354	1.16847	1092.28
TLTF	Default Shape	Default Size	Y	31	F8	F8	Vesicular Basalt	Waramung beach_ Feni Island	Feni	TLTF	Feni	Float	OMAC Ireland	09L016	40161	40182	47.1293	13.3528	12.2746	0.013702		10.8277	2.20368	7.53135	0.183785	2.93572	0.410161	0.783226	2.38525	100.031	256.197	32.333	3.0543	1.51617	1.56473	15.5436	4.33069	1.81393	0.523928	15.5448	0.202632	1.7157	24.296	4.79122	38.2495	36.2523	4.70298	1.18178	1283.43
TLTF	Default Shape	Default Size	Y	32	F9	F9	Basalt	Waramung beach_ Feni Island	Feni	TLTF	Feni	Float	OMAC Ireland	09L016	40161	40182	48.9637	18.8383	6.93226	0.001034		6.3667	3.90183	2.48903	0.172247	4.35784	0.44179	0.599466	3.08185	96.146	357.746	44.5347	3.50551	1.87139	1.79675	17.4753	4.93044	2.16025	0.635952	22.3101	0.276316	2.3047	29.016	6.07132	47.9751	5.62639	5.81082		2704.05
TLTF	Default Shape	Default Size	Y	33	F11	F11	Olivine Basalt	Waramung beach_ Feni Island	Feni	TLTF	Feni	Float	OMAC Ireland	09L016	40161	40182	47.1689	10.0244	15.5342	0.027218		10.5806	1.62481	10.2014	0.178219	2.11568	0.416181	0.719699	1.26151	99.8529	103.779	29.3809	2.87209	1.4122	1.53689	11.9713	4.62609	1.57994	0.541162	12.8568	0.156579	1.0697	23.086	4.46205	29.9503	53.1822	5.00674		999.607
TLTF	Default Shape	Default Size	Y	34	F12	F12	Andesite	Waramung beach_ Feni Island	Feni	TLTF	Feni	Float	OMAC Ireland	09L016	40161	40182	66.9667	15.9761	0.460585	0.003155		1.45161	5.83467	0.88755	0.041483	5.62315	0.09009	0.163217	1.75859	99.2569	232.472	6.02396	0.537974	0.225259	0.228306	17.0696	0.624808	1.6361		3.68505		1.8962	3.046	0.649192	79.8399	1.40758	0.602167		528.682
TLTF	Default Shape	Default Size	Y	36	F15	F15	Basalt	Waramung beach_ Feni Island	Feni	TLTF	Feni	Float	OMAC Ireland	09L016	40161	40182	44.5443	11.0603	12.9363	0.053605		10.958	1.3944	10.5523	0.186057	1.9349	0.441945	0.745026	1.98079	96.7879	127.24	29.2288	3.20181	1.3169	1.6761	12.2976	4.66189	1.57994	0.54978	12.6933	0.165789	1.1362	22.996	4.44377	29.7734	34.9293	5.23903		1024.89
TLTF	Default Shape	Default Size	Y	37	F16	F16	Spherulitic Basalt	Waramung beach_ Feni Island	Feni	TLTF	Feni	Float	OMAC Ireland	09L016	40161	40182	45.4953	14.2596	12.4896	0.004999		10.4583	1.78688	6.2799	0.16678	2.64611	0.466368	0.99381	3.41658	98.4642	147.316	31.4563	3.86126	2.036	1.73179	15.1996	5.26164	1.80457	0.739359	14.4732	0.257895	2.3617	23.676	4.54435	51.4882	32.9462	5.19436		2418.58
TLTF	Default Shape	Default Size	Y	38	F17	F17	Olivine Basalt	Waramung beach_ Feni Island	Feni	TLTF	Feni	Float	OMAC Ireland	09L016	40161	40182	47.8186	13.6432	11.8227	0.012097		10.6207	2.69895	6.98263	0.182588	3.45304	0.450068	0.766199	1.27847	99.7291	236.071	32.3866	3.2452	1.49018	1.56473	14.8732	4.50077	1.72034	0.592866	14.9999	0.184211	1.6967	23.436	4.73636	45.2873	33.1647	4.97994		1259.23
TLTF	Default Shape	Default Size	Y	39	F19	F19	Olivine Basalt	Waramung beach_ Feni Island	Feni	TLTF	Feni	Float	OMAC Ireland	09L016	40161	40182	44.8246	13.0147	14.0518	0.021372		9.92413	1.2556	8.02294	0.175418	1.63408	0.378345	0.959679	1.60064	95.8633	112.816	24.2372	3.63566	1.99268	1.52761	13.7266	4.24118	1.57058	0.70489	10.8318	0.257895	2.1432	18.836	3.60256	28.9718	43.9995	4.53322		886.735
TLTF	Default Shape	Default Size	Y	40	F22	F22	Andesite	Feni Island	Feni	TLTF	Feni	Float	OMAC Ireland	09L016	40161	40182	48.8805	17.9309	9.10712	<0.001		8.59592	2.55069	3.10845	0.244094	4.05689	0.443209	0.788603	0.960192	96.6666	292.415	45.7692	4.62484	2.79841	1.96381	17.59	5.50333	2.60016	0.946172	23.0002	0.432895	4.8317	29.116	6.14447	40.7133	10.3893	5.9359		1456.46
TLTF	Default Shape	Default Size	Y	41	F23	F23	Andesite	Feni Island	Feni	TLTF	Feni	Float	OMAC Ireland	09L016	40161	40182	49.0842	18.8527	8.1696	<0.001		7.65848	2.66859	2.69986	0.222719	3.37438	0.465246	0.718292	2.497	96.411	299.261	52.0043	5.31032	3.17962	2.14942	19.0718	6.21049	2.74056	1.08405	28.0492	0.506579	5.1737	33.526	7.21426	45.0987	8.37647	6.49876		1592.5
TLTF	Default Shape	Default Size	Y	42	F24	F24	Andesite	Feni Island	Feni	TLTF	Feni	Float	OMAC Ireland	09L016	40161	40182	48.2587	18.3	8.67488	0.002071		8.22822	2.63469	2.92387	0.247502	3.90802	0.441366	0.770419	1.93613	96.3258	321.665	50.2778	5.05869	2.96303	2.03805	17.6429	5.89719	2.80607	0.963407	25.5247	0.442105	5.1167	31.256	6.68394	43.3422	9.31915	6.32007		1641.16
TLTF	Default Shape	Default Size	Y	43	OP-N3	OP-N3	Basalt	Niffin_ Ambitle	Feni	TLTF	Feni	Outcrop	Department of Geology_ University of Leicester	Olive3871	40212	40360	46.3359	16.7639	9.67091		0.064153	10.3181	3.94747	4.3168	0.213074	4.80614	0.807318	0.86311	1.66218	99.7691	307.026	55.4993	3.98003	2.15224	2.30705	20.8721	6.17647	2.29189	0.767286	25.3638	0.2625	2.80969	32.8105	6.61329	58.0308	12.1866	6.59027		2174.36
TLTF	Default Shape	Default Size	Y	44	OP-N6	OP-N6	Weathered basalt	Niffin_ Ambitle	Feni	TLTF	Feni	Outcrop	Department of Geology_ University of Leicester	Olive3871	40212	40360	41.0328	6.31762	16.7364		0.005563	21.3537	0.401262	11.3012	0.225588	0.831566	0.126205	1.31527	0.498371	100.146	48.521	22.9503	2.63246	1.32629	1.54357	18.4014	4.00461	1.77541	0.575465	9.0965	0.162132	0.931211	17.8201	2.58607	17.953	66.3863	3.98162	5.5674	419.449
TLTF	Default Shape	Default Size	Y	45	OP-N7	OP-N7	Weathered basalt	Niffin_ Ambitle	Feni	TLTF	Feni	Outcrop	Department of Geology_ University of Leicester	Olive3871	40212	40360	49.0952	13.2365	10.2932		0.007431	8.69781	2.06304	11.7813	0.168191	2.17579	0.209193	0.597449	1.95879	100.284	474.795	32.9939	2.20155	1.35011	1.12863	18.2197	2.78547	1.66243	0.455576	22.0796	0.169853	3.29761	21.9003	3.89912	28.4962	18.9911	3.75279		1049.42
TLTF	Default Shape	Default Size	Y	46	OP-N8A	OP-N8a	Olivine basalt	Niffin_ Ambitle	Feni	TLTF	Feni	Outcrop	Department of Geology_ University of Leicester	Olive3871	40212	40360	46.7412	13.1557	13.0088		0.062476	11.0986	1.98425	7.3652	0.214617	2.79021	0.548826	0.743956	2.76815	100.482	346.33	39.4683	2.94585	1.4613	1.62656	14.4269	4.41638	1.62208	0.527509	20.1829	0.177574	1.87669	23.4632	4.7558	40.9248	29.5542	5.04949		1579.67
TLTF	Default Shape	Default Size	Y	47	OP-N8B	OP-N8b	Trachybasalt	Niffin_ Ambitle	Feni	TLTF	Feni	Outcrop	Department of Geology_ University of Leicester	Olive3871	40212	40360	48.0551	17.7286	7.15249		0.089348	10.0316	4.30704	4.25666	0.211223	3.79572	0.666869	0.847036	2.97282	100.115	432.811	41.9927	3.36892	1.86633	1.81743	26.81	4.78777	1.98523	0.671375	23.5117	0.216176	4.33125	25.3424	5.29223	88.6095	11.9529	5.82751		1458.16
TLTF	Default Shape	Default Size	Y	48	OP-NA1	OP-NA1	Trachyte	Natong_ Ambitle	Feni	TLTF	Feni	Outcrop	Department of Geology_ University of Leicester	Olive3871	40212	40360	54.1467	18.2535	5.91141		0.042933	7.64441	4.16603	3.23552	0.179751	4.48107	0.345542	0.676984	1.00472	100.089	323.57	28.351	2.40525	1.23098	1.12033	20.6173	3.31834	1.69471	0.551487	15.3858	0.247059	4.12922	17.9404	3.56285	59.4077	18.1146	3.24937		1467.53
TLTF	Default Shape	Default Size	Y	50	OP-NA3A	OP-NA3a	Andesite porphyry	Natong_ Ambitle	Feni	TLTF	Feni	Outcrop	Department of Geology_ University of Leicester	Olive3871	40212	40360	55.0951	20.0505	2.29753		0.127529	6.77662	3.70928	2.69184	0.075117	4.65796	0.461564	0.606062	4.02347	100.573	463.628	34.5532	2.24856	1.38188	1.41079	25.3174	3.4233	2.11435	0.479554	19.7425	0.185294	4.30459	19.855	4.41153	43.0346	13.5032	3.66126		1256.66
TLTF	Default Shape	Default Size	Y	51	OP-NA3B	OP-NA3b	Andesite porphyry	Natong_ Ambitle	Feni	TLTF	Feni	Outcrop	Department of Geology_ University of Leicester	Olive3871	40212	40360	54.2104	19.1428	2.5847		0.222221	7.02899	3.13715	4.36979	0.105008	4.93377	0.425978	0.590599	3.07192	99.8233	398.055	36.7923	2.3034	1.31835	1.41079	27.577	3.39908	2.21926	0.527509	18.762	0.177574	4.16923	22.6698	3.86709	43.7466	16.6368	3.53922	1.55822	1089.32
TLTF	Default Shape	Default Size	Y	52	OP-NA4	OP-NA4	Feld-Hbl andesite porphyry	Natong_ Ambitle	Feni	TLTF	Feni	Outcrop	Department of Geology_ University of Leicester	Olive3871	40212	40360	53.8105	19.1	4.99886		0.279595	7.22053	3.78642	2.98316	0.171483	4.98876	0.426502	0.587945	1.1844	99.5381	2510.25	45.6625	2.67163	1.39776	1.36929	21.3298	3.21338	2.06593	0.471561	30.4954	0.185294	2.91131	24.529	4.7558	75.3822	17.4765	3.89772		962.755
TLTF	Default Shape	Default Size	Y	53	OP-NA5	OP-NA5	Feld-Hbl andesite porphyry	Natong_ Ambitle	Feni	TLTF	Feni	Outcrop	Department of Geology_ University of Leicester	Olive3871	40212	40360	54.3583	19.5474	4.46002		0.083213	7.35751	3.67387	3.20888	0.131968	4.92564	0.424992	0.599882	1.08743	99.8591	378.657	43.571	2.78132	1.51689	1.46888	24.8079	3.60092	2.08207	0.503532	22.6474	0.223897	3.92759	21.5844	4.7478	29.9827	15.1128	4.12655		1181.99
TLTF	Default Shape	Default Size	Y	54	OP-BA1	OP-BA1	Trachybasalt	Balangus_ Ambitle	Feni	TLTF	Feni	Outcrop	Department of Geology_ University of Leicester	Olive3871	40212	40360	49.6965	17.9962	9.89663		0.022051	9.04363	1.84158	4.45566	0.163263	3.61448	0.494513	0.897053	1.9611	100.083	460.517	40.1547	3.87818	2.16018	1.49378	22.2118	4.83622	2.41294	0.791264	22.6908	0.324265	5.1414	22.7721	4.45957	37.4855	17.4376	4.65285		1668.26
TLTF	Default Shape	Default Size	Y	55	OP-OL1	OP-Ol1	Highly weathered basalt	Olu_ Ambitle	Feni	TLTF	Feni	Outcrop	Department of Geology_ University of Leicester	Olive3871	40212	40360	45.7169	15.3477	12.6062		0.013012	12.3971	1.21585	6.31525	0.223796	2.96624	0.795618	0.91677	2.16838	100.683	610.404	45.4237	3.2514	1.73926	2	25.0203	5.13495	2.09821	0.631413	23.4171	0.193015	4.03327	23.4267	6.42114	54.337	16.6949	5.65207		1769.21
NBT	Default Shape	Default Size	Y	56		3032A	E		Sulu Range	NBT				Woodhead et al 1998			72.4	13.4	2.75			0.88	1.64	0.81	0.07	4.05	0.03	0.31		100.03	274	9.94	2.29	1.68	0.45	12	2	2.38	0.53	4.09	0.32	0.937	6.48	1.43	26	12	1.73	0.66	199
NBT	Default Shape	Default Size	Y	57		3038B	E		Sulu Range	NBT				Woodhead et al 1998			68.6	12.5	3.4			0.64	1.06	0.73	0.07	3.15	0.04	0.22		100.13	221	8.53	1.95	1.44	0.41	11	1.7	2.08	0.45	3.61	0.27	0.781	5.59	1.24	19.2	8	1.47	0.54	193
SolomonSlab_sed	Default Shape	Default Size	Y	58		33-36-620	Sediment _SolomonPlate		Solomon	SolomonSlab_sed				Woodhead et al 1998			60.67	15.86	4.2			5.37	2.01	2.17	0.1	3.07	0.14	0.52		99.95	492	21.6	3.08	1.91	0.82	16	3.1	1.98	0.67	11.08	0.29	4.07	12.31	2.93	38	17	2.96	0.87	369
NBT	Default Shape	Default Size	Y	59		Gs3/1	Gs		Garua Harbour	NBT				Woodhead et al 1998			57.1	13.2	9.05			3.5	1.26	7.35	0.14	2.35	0.11	0.5		99.96	223	13.66	2.42	1.64	0.67	12	2.41	1.43	0.55	6.57	0.25	0.926	8.85	2	17.5	32	2.23	0.95	394
NBT	Default Shape	Default Size	Y	60		3035	E		Sulu Range	NBT				Woodhead et al 1998			56.8	16.5	8.95			4.4	0.59	4.95	0.15	2.45	0.05	0.45		99.85	99	4.82	1.92	1.31	0.48	14	1.64	1.08	0.44	1.88	0.21	0.4	3.91	0.78	8.5	30	1.25	0.72	216
NBT	Default Shape	Default Size	Y	61		3028	E		Sulu Range	NBT				Woodhead et al 1998			55.8	18.6	9.4			2.4	0.35	2.8	0.17	2.5	0.06	0.64		99.96	49	3.8	2.05	1.39	0.54	16	1.7	0.8	0.46	1.41	0.21	0.35	3.45	0.65	5.4	33	1.24	0.36	247
NBT	Default Shape	Default Size	Y	62		H2/7	Hn		Garove Is.	NBT				Woodhead et al 1998			55.4	16.4	8.1			3	0.53	4.35	0.2	3.8	0.17	1.38		99.82	84	17.09	6.27	4.12	1.48		5.46	3.46	1.42	6.6	0.61	5.48	13.39	2.72	7.5	31	4.21	1.27	208
SolomonSlab_sed	Default Shape	Default Size	Y	63		33-36	Sediment _SolomonPlate		Solomon	SolomonSlab_sed				Woodhead et al 1998			55.24	13.3	4.53			11.47	1.66	3.12	0.13	2.33	0.13	0.54		100.39	362	18.63	3.15	1.89	0.78	14	3.03	1.68	0.66	9.4	0.28	2.46	11.64	2.65	34.8	19	2.88	0.82	246
NBT	Default Shape	Default Size	Y	64		3038G	E		Sulu Range	NBT				Woodhead et al 1998			55.1	17.2	9.85			2.2	0.46	5.15	0.16	2.3	0.05	0.43		100.31	86	4.23	1.94	1.3	0.48	14	1.6	0.95	0.44	1.64	0.2	0.329	3.61	0.7	6.6	35	1.22	0.35	217
NBT	Default Shape	Default Size	Y	65		3039B	E		Sulu Range	NBT				Woodhead et al 1998			55	15.7	10			1.94	0.36	7.05	0.16	2.1	0.06	0.38		100.01	75	4.19	1.82	1.18	0.45	13	1.53	0.89	0.41	1.67	0.18	0.302	3.58	0.69	6.2	37	1.18	0.3	225
NBT	Default Shape	Default Size	Y	66		2649E	E		Sulu Range	NBT				Woodhead et al 1998			54.8	18.9	9.7			2.25	0.28	3	0.16	2.65	0.05	0.61		100.16	44	3.6	2.06	1.39	0.54	16	1.69	0.78	0.47	1.3	0.21	0.333	3.42	0.62	5.3	36	1.25	0.41	250
NBT	Default Shape	Default Size	Y	67		69089	Hn		Narage Is.	NBT				Woodhead et al 1998			54.2	16.5	7.66				1.37	3.64	0.21	4.46	0.77	1.31		99.37	138	64.77	7.03	4.29	2.44		7.87	2.85	1.52	29.71	0.6	4.015	37.21	8.93	21.7	28	8.12	1.16	496
NBT	Default Shape	Default Size	Y	68		2654A	E		Sulu Range	NBT				Woodhead et al 1998			53.76	18.67	9.34			8.13	0.3	5.7	0.15	2.37	0.06	0.42		98.9	48	4.32	2.04	1.37	0.54	14	1.76	0.97	0.46	1.52	0.21	0.317	3.96	0.76	4.6	31	1.34	0.43	196
NBT	Default Shape	Default Size	Y	69		H1/3	Hs		Unea Is.	NBT				Woodhead et al 1998			53.7	15.3	10.2			2.35	1.12	6.95	0.15	2.75	0.17	0.58		99.77	113	17.1	3.35	2.23	0.89		3.19	1.93	0.76	7.68	0.33	2.462	10.89	2.45	17.5	41	2.8	0.78	397
NBT	Default Shape	Default Size	Y	70		F7/2	F		Lolobau Is.	NBT				Woodhead et al 1998			53.5	17.1	10.6			2.7	0.37	5.75	0.17	2.05	0.06	0.59		100.17	92	3.89	2.04	1.41	0.48	14	1.65	0.74	0.47	1.66	0.21	0.407	3.3	0.63	4.3	41	1.18	0.28	250
NBT	Default Shape	Default Size	Y	71		Gn1/4	Gn		Lake Dakataua	NBT				Woodhead et al 1998			53.5	15.8	10.8			3.55	0.51	6.05	0.18	2.4	0.14	0.71		100.28	106	8.77	2.61	1.71	0.75	15	2.39	0.9	0.58	3.76	0.25	0.464	6.76	1.38	5.4	38	2.02	0.7	446
NBT	Default Shape	Default Size	Y	72		0217B	E		Sulu Range	NBT				Woodhead et al 1998			53.2	15.7	10.7			1.95	0.2	8.35	0.17	1.79	0.04	0.33		100	39	2.06	1.23	0.84	0.33	12	1	0.47	0.28	0.75	0.13	0.167	1.94	0.36	1.9	38	0.71	0.23	178
NBT	Default Shape	Default Size	Y	73		E2/1 E	E		Sulu Range	NBT				Woodhead et al 1998			53.1	14.7	10.9			1.91	0.28	9.2	0.16	1.58	0.03	0.3		99.76	34	1.75	1.08	0.75	0.28	11	0.89	0.42	0.25	0.64	0.12	0.142	1.65	0.3	2.5	42	0.62	0.4	162
NBT	Default Shape	Default Size	Y	74		2651A	E		Sulu Range	NBT				Woodhead et al 1998			53.06	16.64	11.1			8.06	0.35	7.72	0.14	2.18	0.06	0.37		99.68	57	3.97	1.83	1.22	0.5	13	1.57	0.83	0.41	1.45	0.18	0.242	3.67	0.69	4.9	34	1.22	0.33	213
NBT	Default Shape	Default Size	Y	75		217E	E		Sulu Range	NBT				Woodhead et al 1998			53	14.83	11.51			9.36	0.22	9.75	0.15	1.74	0.04	0.29		100.89	36	1.79	1.13	0.78	0.29	11	0.92	0.42	0.26	0.65	0.12	0.145	1.72	0.31	3.1	41	0.64	0.19	163
NBT	Default Shape	Default Size	Y	76		H2/3	Hn		Garove Is.	NBT				Woodhead et al 1998			52.6	16.3	9.8			1.8	0.41	5.3	0.2	3	0.16	1.43		99.88	68	14.5	5.37	3.47	1.28		4.78	2.55	1.2	5.64	0.49	4.441	11.65	2.34	6.2	38	3.69	1.21	208
NBT	Default Shape	Default Size	Y	77		F5/2	F		Wulai Is.	NBT				Woodhead et al 1998			52.5	17.9	10.2			4.05	0.48	5.6	0.16	2.15	0.08	0.49		99.79	76	5.15	1.7	1.11	0.5	15	1.55	0.69	0.38	2.12	0.17	0.342	4.14	0.83	4.1	36	1.28	1.32	401
NBT	Default Shape	Default Size	Y	78		E5/11	E		Ulawun	NBT				Woodhead et al 1998			52.32	18.66	10.6			3.22	0.32	4.69	0.17	2.48	0.08	0.76		99.93	80	3.18	2.29	1.52	0.61	17	1.91	0.69	0.52	1.17	0.22	0.368	3.37	0.58	4.8	34	1.31	0.67	286
SolomonSlab_bas	Default Shape	Default Size	Y	79		29-19	Basalt_SolomonPlate		Solomon	SolomonSlab_bas				Woodhead et al 1998			52.02	13.86	10.37			4.79	0.37	6.22	0.27	2.71	0.25	2		100.35	53	20.94	7.67	5.05	1.64	20	6.45	3.51	1.7	8.27	0.75	8.55	15.5	3.17	4.5	46	4.87	1.59	161
NBT	Default Shape	Default Size	Y	80		H3/7	Hn		Mundua Is.	NBT				Woodhead et al 1998			51.7	16.9	10.9			2.95	0.75	6.45	0.18	2.5	0.18	0.99		99.96	96	15.27	3.89	2.49	1.06		3.67	1.82	0.88	6.45	0.35	3.217	10.79	2.31	13.1	35	3.08	1.08	343
SolomonSlab_sed	Default Shape	Default Size	Y	81		44741	Sediment _SolomonPlate		Solomon	SolomonSlab_sed				Woodhead et al 1998			51.61	18.29	3.32			9.55	1.83	3.79	0.28	2.2	0.25	0.84		100.11	1063	35.63	6.36	4.03	1.64	19	6.64	2.46	1.4	26.98	0.57	5.71	27.44	6.54	47.5	23	6.14	1.6	251
NBT	Default Shape	Default Size	Y	82		O871E	E		Likuruanga	NBT				Woodhead et al 1998			51.2	15.7	11.2			2.5	0.21	9.95	0.17	1.53	0.04	0.48		100.11	71	1.82	1.28	0.92	0.28	11	0.98	0.39	0.3	0.83	0.15	0.158	1.76	0.32	2.4	40	0.65	0.18	244
SolomonSlab_bas	Default Shape	Default Size	Y	83		84-74	Basalt_SolomonPlate		Solomon	SolomonSlab_bas				Woodhead et al 1998			50.93	14.62	10.69			11.76	0.31	5.73	0.21	2.98	0.28	2.01		99.97	28	22.11	7.8	5.16	1.66	20	6.63	3.62	1.74	8.89	0.76	9.49	16.09	3.33	3.2	48	4.96	1.71	151
NBT	Default Shape	Default Size	Y	84		Gs2/1	Gs		Mt Bangum	NBT				Woodhead et al 1998			50.9	15.6	11.7			5.2	0.62	6.9	0.18	1.69	0.11	0.52		99.8	126	9.14	2.12	1.35	0.7		2.18	0.86	0.47	4.74	0.19	0.486	7.13	1.52	8.9	47	1.96	0.59	547
SolomonSlab_bas	Default Shape	Default Size	Y	85		29-21	Basalt_SolomonPlate		Solomon	SolomonSlab_bas				Woodhead et al 1998			50.71	14.13	10.8			5.3	0.42	6.17	0.2	2.54	0.21	1.64		100.09	103	16.51	5.97	3.91	1.34	18	5.09	2.82	1.32	6.63	0.56	7.33	12.32	2.52	7	45	3.87	1.26	147
ManusMORB	Default Shape	Default Size	Y	86		39-1 (n=5)	Manus_MORB		Manus	ManusMORB				Woodhead et al 1998			50.46	13.7	11.46			2	0.05	6.99	0.2	2.42	0.09	1.23		99.85	11	7.46	5.74	3.95	1.13	17	4.52	2.14	1.32	2.19	0.57	1.25	8.09	1.41	0.9	46	3.09	0.95	75
NBT	Default Shape	Default Size	Y	87		H1/1	Hs		Unea Is.	NBT				Woodhead et al 1998			50.4	19.5	11.2			2.7	0.59	4.45	0.16	2.65	0.15	0.8		100.13	80	12.3	3.18	2.09	0.89		2.99	1.34	0.72	5.18	0.31	1.95	8.92	1.89	9.1	32	2.48	0.7	510
SolomonSlab_bas	Default Shape	Default Size	Y	88		29-16	Basalt_SolomonPlate		Solomon	SolomonSlab_bas				Woodhead et al 1998			50.29	13.34	9.54			5.53	0.44	5.93	0.24	2.3	0.23	1.86		100.5	36	23.18	7.69	5.05	1.62	18	6.59	4.06	1.72	8.89	0.73	9.78	16.31	3.39	6.4	43	5.04	1.83	121
ManusMORB	Default Shape	Default Size	Y	89		44585	Manus_MORB		Manus	ManusMORB				Woodhead et al 1998			50.29	13.61	11.45			1.91	0.06	6.73	0.2	2.46	0.12	1.38		99.92	9	7.42	5.55	3.75	1.12	17	4.4	2.08	1.26	2.15	0.54	1.45	8.06	1.4	0.8	47	3.06	1.04	78
SolomonSlab_bas	Default Shape	Default Size	Y	90		29-17	Basalt_SolomonPlate		Solomon	SolomonSlab_bas				Woodhead et al 1998			50.14	14.9	11.75			5.01	0.32	5.96	0.19	2.74	0.5	1.74		100.4	20	17.93	6.63	4.44	1.46	18	5.62	2.91	1.48	8.11	0.65	7.55	13.65	2.81	5.5	47	4.23	1.34	155
SolomonSlab_bas	Default Shape	Default Size	Y	91		29-20	Basalt_SolomonPlate		Solomon	SolomonSlab_bas				Woodhead et al 1998			49.73	14.03	10.18			6.51	0.3	6.07	0.23	2.73	0.29	2.02		100.28	22	20.45	7.65	5.03	1.63	19	6.43	3.53	1.69	8.04	0.74	8.61	15.35	3.12	4.9	47	4.85	1.62	144
ManusMORB	Default Shape	Default Size	Y	92		32-5	Manus_MORB		Manus	ManusMORB				Woodhead et al 1998			49.63	14.84	12.36			1.54	0.05	8.14	0.17	2.33	0.07	0.98		99.65	5	5.13	4.08	2.74	0.86	15	3.23	1.5	0.92	1.42	0.39	0.87	5.78	0.99	0.5	42	2.25	0.67	73
NBT	Default Shape	Default Size	Y	93		Gn2/1	Gn		Kimbe Is.	NBT				Woodhead et al 1998			49.2	15.3	13			2.55	0.19	10.1	0.18	1.51	0.06	0.52		100.33	34	3.86	2.2	1.48	0.52	12	1.79	0.61	0.5	1.48	0.21	0.243	3.61	0.68	1.1	48	1.28	0.43	224
NBT	Default Shape	Default Size	Y	94		H3/3	Hn		Undaka Is.	NBT				Woodhead et al 1998			49.2	14.4	11.4			1.4	0.19	10.8	0.18	2.15	0.11	1.15		99.82	34	10.43	3.75	2.37	0.98		3.44	1.74	0.83	3.92	0.32	3.501	8.44	1.7	2.6	39	2.65	0.89	180
NBT	Default Shape	Default Size	Y	95		69092	Hn		Narage Is.	NBT				Woodhead et al 1998			48.3	18.3	10.94				0.83	5.2	0.19	3.16	0.46	0.99		98.46	91	48.95	4.44	2.58	1.74		5.23	1.88	0.93	22.42	0.36	2.084	27.49	6.67	10.3	31	5.71	0.86	620
ManusMORB	Default Shape	Default Size	Y	96		44615	Manus_MORB		Manus	ManusMORB				Woodhead et al 1998			47.24	16.69	12.44			1.22	0.01	10.72	0.17	2.1	0.03	0.62		99.89	1	2.9	3.49	2.67	0.63	13	2.42	0.94	0.84	0.76	0.42	0.23	3.48	0.58	0.1	48	1.47	0.4	62
NBT	Default Shape	Default Size	Y	97		69098	Hn		Narage Is.	NBT				Woodhead et al 1998			46.9	18.7	12.4				0.57	6.63	0.19	2.22	0.34	0.93		99.36	66	39.98	3.66	2.11	1.46		4.29	1.58	0.76	18.46	0.29	1.748	23.01	5.5	6.1	33	4.76	0.85	625
SolomonSlab_sed	Default Shape	Default Size	Y	98		44863	Sediment _SolomonPlate		Solomon	SolomonSlab_sed				Woodhead et al 1998			44.46	12.05	14.66			7.36	1.8	2.11	0.64	2.52	0.17	0.6		100.46	337	44.25	4.31	2.59	1.13	11	4.31	2.68	0.92	16.2	0.37	5.67	17.25	4.01	43.7	26	4.03	1.18	462
SolomonSlab_sed	Default Shape	Default Size	Y	99		44590	Sediment _SolomonPlate		Solomon	SolomonSlab_sed				Woodhead et al 1998			32.9	10.46	23.94			4.89	0.96	1.93	0.16	1.73	0.15	0.45		99.66	411	16.41	3.02	1.89	0.8	11	3.01	1.3	0.66	10.61	0.27	2.71	11.78	2.74	21.4	14	2.8	0.75	784
[truncated: 88 more columns]
