# Supplementary material for: The Petrology & Geochemistry of REE-Enriched, Alkaline Vol-Canic Rocks of Ambitle Island, Feni Island Group, Papua New Guinea
Source: Preprints.org preprint supplement (doi:10.20944/preprints202306.0971.v1), 2023-06-14
Supplement: Supplementary file 13 [file Amp-TB_Ridolfi 2010.xls]

## Sheet: Amp calc
Reference	El Reventador	El Reventador	El Reventador	El Reventador	El Reventador	El Reventador	El Reventador	El Reventador	El Reventador	Natong CreekAmbitle	Natong CreekAmbitle
Sample	RE	RE	RE	RM	RM	RM	RM	RM	Rev-E	OPNA5	OPNA5	OPNA5	OPNA5	OP_N8B	OP_N8B	OP_N8B	OP_N8B	OP_N8B	OP_N8B	OP_N8B	OPNA5	OPNA6
Label	RE_1amp1	RE_8amp2	RE_10amp1	RM_2amp1	RM_2amp2	RM_2amp3	RM_3bAmp1	RM_3cAmp1	e-1-amp-line	Job7	Job7	Job7	Job7	Point7/Job8	Point8/Job8	Point9/Job8	Point10/job8	Point12	Point13	Point14	Job7	Job7
Spot	2 / 1 .	15 / 1 .	19 / 1 .	21 / 1 .	22 / 1 .	23 / 1 .	34 / 1 .	36 / 1 .	10	Point 18	Point19	Point20	Point21	Spindle-shaped Hbl	Hbl megacryst	Hbl megacryst	inclusion	inclusion	Hbl megacryst	Hbl megacryst	Point18	Point16:inclusion in zonedplag
Input (input amphibole composition in the blue cells)										Note: you can continue typing data from here to the end of the sheet
SiO2 (wt.%)	45.4737	45.3984	44.3863	43.1422	43.9217	43.2524	42.5017	42.7723	45.6895	40.78	40.6	40.18	40.28	38.697	40.193	39.923	35.261	39.027	40.102	40.02	40.775	37.444
TiO2 (wt.%)	2.52873	2.28243	2.44615	2.22203	1.98836	2.10489	3.91244	3.85849	1.9044	2.26	1.84	1.94	2.12	2.805	2.654	2.601	3.533	0	2.579	2.673	2.26	0
Al2O3 (wt.%)	9.07045	9.10593	10.1099	11.54	11.1039	11.5696	10.5023	10.3717	9.9992	12.36	12.96	13.41	12.79	14.028	13.382	13.984	17.465	29.746	14.107	13.63	12.357	12.015
Cr2O3 (wt.%)	0.02634	0	0.02889	0.03276	0.03707	0.0187	0.04916	0.04721	0.1226		0	0.01	0.01	0	0.02	0.004	0.065	0	0	0	0	0
[	12.6824	12.799	12.8412	12.0512	12.1567	12.0691	12.175	12.1056	11.312	12.86	11.49	12.21	12.25	11.067	10.556	11.169	12.349	0.062	11.242	10.824	12.857	10.007
MnO (wt.%)	0.23527	0.20343	0.15102	0.33837	0.22153	0.26327	0.24464	0.20395	0.1262	0.28	0.12	0.16	0.22	0.229	0.197	0.189	0.193	0	0.23	0.233	0.281	0.76
MgO (wt.%)	14.2136	14.6018	14.0423	14.2553	14.5579	14.4599	14.1641	14.3152	15.2316	13.18	14.48	13.58	13.45	13.052	13.831	13.428	16.084	0	13.528	13.658	13.182	20.566
CaO (wt.%)	11.3152	11.1506	11.0827	11.186	11.1305	11.0687	11.001	10.9648	11.2851	12.08	12.27	12.29	12.18	12.344	12.088	12.107	0.062	11.943	11.799	12.204	12.078	0.924
Na2O (wt.%)	2.03819	1.8738	2.00828	2.33433	2.16596	2.22453	2.6365	2.51156	2.0299	2.6	2.73	2.64	2.75	2.288	2.404	2.355	1.471	3.958	2.383	2.4	2.596	0.059
K2O (wt.%)	0.62045	0.56181	0.59283	0.57863	0.54966	0.58736	0.94595	0.91319	0.5253	1.4	1.28	1.23	1.29	1.615	1.635	1.553	7.982	0.002	1.545	1.573	1.401	0.251
F (wt.%)	0.16709	0.26195	0.19579	0.13426	0.15647	0.17834	0.4837	0.45834
Cl (wt.%)	0.06827	0.07473	0.05598	0.04341	0.05352	0.04172	0.11407	0.09281
Output (do not delete or change the content of the cells)
Check composition and classification
H2Oamp (wt.%)	1.844	1.79738	1.82244	1.85226	1.84778	1.83429	1.67483	1.69348	1.95268	1.89206	1.90411	1.89567	1.88696	1.8673	1.89441	1.8975	1.81868	1.81236	1.90334	1.89656	1.89183	1.68542
Fe3+/Fe2+ check
SiO2	45.4737	45.3984	44.3863	43.1422	43.9217	43.2524	42.5017	42.7723	45.6895	40.78	40.6	40.18	40.28	38.697	40.193	39.923	35.261	39.027	40.102	40.02	40.775	37.444	0	0	0	0	0	0	0	0	0	0	0	0	0	0	0	0	0	0	0	0	0	0	0	0	0	0	0
TiO2	2.52873	2.28243	2.44615	2.22203	1.98836	2.10489	3.91244	3.85849	1.9044	2.26	1.84	1.94	2.12	2.805	2.654	2.601	3.533	0	2.579	2.673	2.26	0	0	0	0	0	0	0	0	0	0	0	0	0	0	0	0	0	0	0	0	0	0	0	0	0	0	0	0
Al2O3	9.07045	9.10593	10.1099	11.54	11.1039	11.5696	10.5023	10.3717	9.9992	12.36	12.96	13.41	12.79	14.028	13.382	13.984	17.465	29.746	14.107	13.63	12.357	12.015	0	0	0	0	0	0	0	0	0	0	0	0	0	0	0	0	0	0	0	0	0	0	0	0	0	0	0
Cr2O3	0.02634	0	0.02889	0.03276	0.03707	0.0187	0.04916	0.04721	0.1226	0	0	0.01	0.01	0	0.02	0.004	0.065	0	0	0	0	0	0	0	0	0	0	0	0	0	0	0	0	0	0	0	0	0	0	0	0	0	0	0	0	0	0	0	0
Fe2O3 (wt.%)	5.49426	7.9885	7.46705	8.05463	8.86006	9.18415	5.69859	6.19804	7.32684	3.54038	5.02068	4.43427	3.47122	2.11686	2.57683	3.28263	0	0	4.60354	2.65038	3.55793	13.5521
FeO (wt.%)	7.73857	5.6109	6.12228	4.80358	4.18428	3.80511	7.04736	6.52856	4.71921	9.67432	6.97233	8.21998	9.12655	9.16222	8.23734	8.21524	12.349	0.062	7.09968	8.43915	9.65553	-0.771678
MnO	0.23527	0.20343	0.15102	0.33837	0.22153	0.26327	0.24464	0.20395	0.1262	0.28	0.12	0.16	0.22	0.229	0.197	0.189	0.193	0	0.23	0.233	0.281	0.76	0	0	0	0	0	0	0	0	0	0	0	0	0	0	0	0	0	0	0	0	0	0	0	0	0	0	0
MgO	14.2136	14.6018	14.0423	14.2553	14.5579	14.4599	14.1641	14.3152	15.2316	13.18	14.48	13.58	13.45	13.052	13.831	13.428	16.084	0	13.528	13.658	13.182	20.566	0	0	0	0	0	0	0	0	0	0	0	0	0	0	0	0	0	0	0	0	0	0	0	0	0	0	0
CaO	11.3152	11.1506	11.0827	11.186	11.1305	11.0687	11.001	10.9648	11.2851	12.08	12.27	12.29	12.18	12.344	12.088	12.107	0.062	11.943	11.799	12.204	12.078	0.924	0	0	0	0	0	0	0	0	0	0	0	0	0	0	0	0	0	0	0	0	0	0	0	0	0	0	0
Na2O	2.03819	1.8738	2.00828	2.33433	2.16596	2.22453	2.6365	2.51156	2.0299	2.6	2.73	2.64	2.75	2.288	2.404	2.355	1.471	3.958	2.383	2.4	2.596	0.059	0	0	0	0	0	0	0	0	0	0	0	0	0	0	0	0	0	0	0	0	0	0	0	0	0	0	0
K2O	0.62045	0.56181	0.59283	0.57863	0.54966	0.58736	0.94595	0.91319	0.5253	1.4	1.28	1.23	1.29	1.615	1.635	1.553	7.982	0.002	1.545	1.573	1.401	0.251	0	0	0	0	0	0	0	0	0	0	0	0	0	0	0	0	0	0	0	0	0	0	0	0	0	0	0
F	0.16709	0.26195	0.19579	0.13426	0.15647	0.17834	0.4837	0.45834	0	0	0	0	0	0	0	0	0	0	0	0	0	0	0	0	0	0	0	0	0	0	0	0	0	0	0	0	0	0	0	0	0	0	0	0	0	0	0	0	0
Cl	0.06827	0.07473	0.05598	0.04341	0.05352	0.04172	0.11407	0.09281	0	0	0	0	0	0	0	0	0	0	0	0	0	0	0	0	0	0	0	0	0	0	0	0	0	0	0	0	0	0	0	0	0	0	0	0	0	0	0	0	0
H2Ocalc	1.844	1.79738	1.82244	1.85226	1.84778	1.83429	1.67483	1.69348	1.95268	1.89206	1.90411	1.89567	1.88696	1.8673	1.89441	1.8975	1.81868	1.81236	1.90334	1.89656	1.89183	1.68542
Sum	100.834	100.912	100.512	100.518	100.779	100.593	100.976	100.93	100.913	100.047	100.177	99.9899	99.5747	98.2044	99.1126	99.5394	96.2837	86.5504	99.8796	99.3771	100.035	86.4848	0	0	0	0	0	0	0	0	0	0	0	0	0	0	0	0	0	0	0	0	0	0	0	0	0	0	0
O=F,Cl (wt.%)	-0.0857609	-0.127161	-0.0950726	-0.0663278	-0.077961	-0.0845073	-0.22941	-0.213935	0	0	0	0	0	0	0	0	0	0	0	0	0	0
Total (wt.%)	100.748	100.784	100.417	100.451	100.701	100.508	100.747	100.716	100.913	100.047	100.177	99.9899	99.5747	98.2044	99.1126	99.5394	96.2837	86.5504	99.8796	99.3771	100.035	86.4848
Sum	98.4397	98.3138	97.9413	97.8586	98.0432	97.8385	98.7306	98.6152	98.2258	97.8	97.77	97.65	97.34	96.125	96.96	97.313	94.465	84.738	97.515	97.215	97.787	82.026	0	0	0	0	0	0	0	0	0	0	0	0	0	0	0	0	0	0	0	0	0	0	0	0	0	0	0
O=F,Cl (wt.%)	-0.0857609	-0.127161	-0.0950726	-0.0663278	-0.077961	-0.0845073	-0.22941	-0.213935	0	0	0	0	0	0	0	0	0	0	0	0	0	0
Total (wt.%)	98.3539	98.1867	97.8462	97.7923	97.9652	97.754	98.5011	98.4013	98.2258	97.8	97.77	97.65	97.34	96.125	96.96	97.313	94.465	84.738	97.515	97.215	97.787	82.026
Formulae based on Leake et al. (1997)
XO	8.78496	8.7969	8.83823	8.84156	8.80547	8.83537	8.86064	8.85049	8.70599	8.98489	8.92807	8.9678	9.00918	9.10408	8.97376	8.95914	9.34745	9.38006	8.93167	8.96358	8.98603	10.0865	#DIV/0!	#DIV/0!	#DIV/0!	#DIV/0!	#DIV/0!	#DIV/0!	#DIV/0!	#DIV/0!	#DIV/0!	#DIV/0!	#DIV/0!	#DIV/0!	#DIV/0!	#DIV/0!	#DIV/0!	#DIV/0!	#DIV/0!	#DIV/0!	#DIV/0!	#DIV/0!	#DIV/0!	#DIV/0!	#DIV/0!	#DIV/0!	#DIV/0!	#DIV/0!	#DIV/0!
Si	6.64877	6.64677	6.52912	6.34852	6.43684	6.36028	6.26777	6.30045	6.62027	6.0982	6.03288	5.99704	6.03971	5.86346	6.00297	5.95293	5.48566	6.09273	5.96128	5.97035	6.09822	6.28587	#DIV/0!	#DIV/0!	#DIV/0!	#DIV/0!	#DIV/0!	#DIV/0!	#DIV/0!	#DIV/0!	#DIV/0!	#DIV/0!	#DIV/0!	#DIV/0!	#DIV/0!	#DIV/0!	#DIV/0!	#DIV/0!	#DIV/0!	#DIV/0!	#DIV/0!	#DIV/0!	#DIV/0!	#DIV/0!	#DIV/0!	#DIV/0!	#DIV/0!	#DIV/0!	#DIV/0!
Ti	0.278039	0.251299	0.27059	0.245891	0.219135	0.232765	0.433887	0.427414	0.207511	0.254147	0.205608	0.217747	0.239048	0.319619	0.298084	0.291656	0.413334	0	0.288302	0.299878	0.254179	0	#DIV/0!	#DIV/0!	#DIV/0!	#DIV/0!	#DIV/0!	#DIV/0!	#DIV/0!	#DIV/0!	#DIV/0!	#DIV/0!	#DIV/0!	#DIV/0!	#DIV/0!	#DIV/0!	#DIV/0!	#DIV/0!	#DIV/0!	#DIV/0!	#DIV/0!	#DIV/0!	#DIV/0!	#DIV/0!	#DIV/0!	#DIV/0!	#DIV/0!	#DIV/0!	#DIV/0!
Al	1.56302	1.57127	1.7527	2.00139	1.91789	2.00511	1.82535	1.80058	1.70757	2.17835	2.26965	2.3589	2.26022	2.50511	2.35554	2.4575	3.20227	5.47306	2.47151	2.39648	2.17809	2.37718	#DIV/0!	#DIV/0!	#DIV/0!	#DIV/0!	#DIV/0!	#DIV/0!	#DIV/0!	#DIV/0!	#DIV/0!	#DIV/0!	#DIV/0!	#DIV/0!	#DIV/0!	#DIV/0!	#DIV/0!	#DIV/0!	#DIV/0!	#DIV/0!	#DIV/0!	#DIV/0!	#DIV/0!	#DIV/0!	#DIV/0!	#DIV/0!	#DIV/0!	#DIV/0!	#DIV/0!
Cr	0.00304488	0	0.00335991	0.00381142	0.00429526	0.00217411	0.00573181	0.00549814	0.014045	0	0	0.00118005	0.00118549	0	0.00236167	0.000471564	0.00799504	0	0	0	0	0	#DIV/0!	#DIV/0!	#DIV/0!	#DIV/0!	#DIV/0!	#DIV/0!	#DIV/0!	#DIV/0!	#DIV/0!	#DIV/0!	#DIV/0!	#DIV/0!	#DIV/0!	#DIV/0!	#DIV/0!	#DIV/0!	#DIV/0!	#DIV/0!	#DIV/0!	#DIV/0!	#DIV/0!	#DIV/0!	#DIV/0!	#DIV/0!	#DIV/0!	#DIV/0!	#DIV/0!
Fe	1.55073	1.56713	1.57968	1.48306	1.48993	1.48422	1.50153	1.49126	1.37074	1.60824	1.42783	1.52405	1.5361	1.40237	1.31847	1.39277	1.60665	0.00809459	1.39757	1.35041	1.60807	1.40489	#DIV/0!	#DIV/0!	#DIV/0!	#DIV/0!	#DIV/0!	#DIV/0!	#DIV/0!	#DIV/0!	#DIV/0!	#DIV/0!	#DIV/0!	#DIV/0!	#DIV/0!	#DIV/0!	#DIV/0!	#DIV/0!	#DIV/0!	#DIV/0!	#DIV/0!	#DIV/0!	#DIV/0!	#DIV/0!	#DIV/0!	#DIV/0!	#DIV/0!	#DIV/0!	#DIV/0!
Mn	0.0291362	0.0252274	0.018816	0.0421743	0.0274987	0.0327909	0.0305576	0.0254459	0.0154883	0.0354649	0.0151031	0.0202271	0.0279406	0.0293899	0.0249211	0.0238702	0.0254318	0	0.0289593	0.0294418	0.035596	0.108064	#DIV/0!	#DIV/0!	#DIV/0!	#DIV/0!	#DIV/0!	#DIV/0!	#DIV/0!	#DIV/0!	#DIV/0!	#DIV/0!	#DIV/0!	#DIV/0!	#DIV/0!	#DIV/0!	#DIV/0!	#DIV/0!	#DIV/0!	#DIV/0!	#DIV/0!	#DIV/0!	#DIV/0!	#DIV/0!	#DIV/0!	#DIV/0!	#DIV/0!	#DIV/0!	#DIV/0!
Mg	3.0981	3.18704	3.07932	3.12722	3.18056	3.16987	3.1139	3.14351	3.29015	2.93819	3.20759	3.0216	3.00649	2.94825	3.0795	2.9849	3.73026	0	2.99791	3.03753	2.93901	5.14687	#DIV/0!	#DIV/0!	#DIV/0!	#DIV/0!	#DIV/0!	#DIV/0!	#DIV/0!	#DIV/0!	#DIV/0!	#DIV/0!	#DIV/0!	#DIV/0!	#DIV/0!	#DIV/0!	#DIV/0!	#DIV/0!	#DIV/0!	#DIV/0!	#DIV/0!	#DIV/0!	#DIV/0!	#DIV/0!	#DIV/0!	#DIV/0!	#DIV/0!	#DIV/0!	#DIV/0!
Ca	1.77257	1.74914	1.74666	1.76361	1.74769	1.74389	1.73819	1.73049	1.75196	1.93544	1.95345	1.96534	1.95674	2.00397	1.93432	1.93421	0.0103344	1.99765	1.87922	1.95067	1.93536	0.166193	#DIV/0!	#DIV/0!	#DIV/0!	#DIV/0!	#DIV/0!	#DIV/0!	#DIV/0!	#DIV/0!	#DIV/0!	#DIV/0!	#DIV/0!	#DIV/0!	#DIV/0!	#DIV/0!	#DIV/0!	#DIV/0!	#DIV/0!	#DIV/0!	#DIV/0!	#DIV/0!	#DIV/0!	#DIV/0!	#DIV/0!	#DIV/0!	#DIV/0!	#DIV/0!	#DIV/0!
Na	0.57779	0.53191	0.572763	0.666004	0.615444	0.634233	0.753839	0.717293	0.570267	0.753827	0.786513	0.763968	0.799472	0.672167	0.696136	0.680836	0.443702	1.19803	0.686818	0.69419	0.752762	0.0192034	#DIV/0!	#DIV/0!	#DIV/0!	#DIV/0!	#DIV/0!	#DIV/0!	#DIV/0!	#DIV/0!	#DIV/0!	#DIV/0!	#DIV/0!	#DIV/0!	#DIV/0!	#DIV/0!	#DIV/0!	#DIV/0!	#DIV/0!	#DIV/0!	#DIV/0!	#DIV/0!	#DIV/0!	#DIV/0!	#DIV/0!	#DIV/0!	#DIV/0!	#DIV/0!	#DIV/0!
K	0.115731	0.104935	0.111249	0.108626	0.102766	0.110187	0.177965	0.171605	0.0971019	0.267081	0.242644	0.234203	0.246761	0.312184	0.311526	0.29542	1.58419	0.000398325	0.292997	0.299373	0.267306	0.0537548	#DIV/0!	#DIV/0!	#DIV/0!	#DIV/0!	#DIV/0!	#DIV/0!	#DIV/0!	#DIV/0!	#DIV/0!	#DIV/0!	#DIV/0!	#DIV/0!	#DIV/0!	#DIV/0!	#DIV/0!	#DIV/0!	#DIV/0!	#DIV/0!	#DIV/0!	#DIV/0!	#DIV/0!	#DIV/0!	#DIV/0!	#DIV/0!	#DIV/0!	#DIV/0!	#DIV/0!
Tot	15.6369	15.6347	15.6643	15.7903	15.742	15.7755	15.8487	15.8135	15.6451	16.0689	16.1413	16.1043	16.1137	16.0565	16.0238	16.0146	16.5098	14.77	16.0046	16.0283	16.0686	15.562	#DIV/0!	#DIV/0!	#DIV/0!	#DIV/0!	#DIV/0!	#DIV/0!	#DIV/0!	#DIV/0!	#DIV/0!	#DIV/0!	#DIV/0!	#DIV/0!	#DIV/0!	#DIV/0!	#DIV/0!	#DIV/0!	#DIV/0!	#DIV/0!	#DIV/0!	#DIV/0!	#DIV/0!	#DIV/0!	#DIV/0!	#DIV/0!	#DIV/0!	#DIV/0!	#DIV/0!
F	0.0772649	0.121294	0.0910852	0.0624838	0.072523	0.0829403	0.225597	0.213524	0	0	0	0	0	0	0	0	0	0	0	0	0	0	#DIV/0!	#DIV/0!	#DIV/0!	#DIV/0!	#DIV/0!	#DIV/0!	#DIV/0!	#DIV/0!	#DIV/0!	#DIV/0!	#DIV/0!	#DIV/0!	#DIV/0!	#DIV/0!	#DIV/0!	#DIV/0!	#DIV/0!	#DIV/0!	#DIV/0!	#DIV/0!	#DIV/0!	#DIV/0!	#DIV/0!	#DIV/0!	#DIV/0!	#DIV/0!	#DIV/0!
Cl	0.0169167	0.0185426	0.0139555	0.0108259	0.0132928	0.0103972	0.0285091	0.0231691	0	0	0	0	0	0	0	0	0	0	0	0	0	0	#DIV/0!	#DIV/0!	#DIV/0!	#DIV/0!	#DIV/0!	#DIV/0!	#DIV/0!	#DIV/0!	#DIV/0!	#DIV/0!	#DIV/0!	#DIV/0!	#DIV/0!	#DIV/0!	#DIV/0!	#DIV/0!	#DIV/0!	#DIV/0!	#DIV/0!	#DIV/0!	#DIV/0!	#DIV/0!	#DIV/0!	#DIV/0!	#DIV/0!	#DIV/0!	#DIV/0!
OHcalc	1.90582	1.86016	1.89496	1.92669	1.91418	1.90666	1.74589	1.76331	2	2	2	2	2	2	2	2	2	2	2	2	2	2	#DIV/0!	#DIV/0!	#DIV/0!	#DIV/0!	#DIV/0!	#DIV/0!	#DIV/0!	#DIV/0!	#DIV/0!	#DIV/0!	#DIV/0!	#DIV/0!	#DIV/0!	#DIV/0!	#DIV/0!	#DIV/0!	#DIV/0!	#DIV/0!	#DIV/0!	#DIV/0!	#DIV/0!	#DIV/0!	#DIV/0!	#DIV/0!	#DIV/0!	#DIV/0!	#DIV/0!
Sum	2	2	2	2	2	2	2	2	2	2	2	2	2	2	2	2	2	2	2	2	2	2	#DIV/0!	#DIV/0!	#DIV/0!	#DIV/0!	#DIV/0!	#DIV/0!	#DIV/0!	#DIV/0!	#DIV/0!	#DIV/0!	#DIV/0!	#DIV/0!	#DIV/0!	#DIV/0!	#DIV/0!	#DIV/0!	#DIV/0!	#DIV/0!	#DIV/0!	#DIV/0!	#DIV/0!	#DIV/0!	#DIV/0!	#DIV/0!	#DIV/0!	#DIV/0!	#DIV/0!
13(Si+Al+Cr+Ti+Fe+Mg+Mn)	13.1708	13.2487	13.2336	13.2521	13.2761	13.2872	13.1787	13.1942	13.2258	13.1126	13.1587	13.1407	13.1107	13.0682	13.0818	13.1041	14.4716	11.5739	13.1455	13.0841	13.1132	15.3229	#DIV/0!	#DIV/0!	#DIV/0!	#DIV/0!	#DIV/0!	#DIV/0!	#DIV/0!	#DIV/0!	#DIV/0!	#DIV/0!	#DIV/0!	#DIV/0!	#DIV/0!	#DIV/0!	#DIV/0!	#DIV/0!	#DIV/0!	#DIV/0!	#DIV/0!	#DIV/0!	#DIV/0!	#DIV/0!	#DIV/0!	#DIV/0!	#DIV/0!	#DIV/0!	#DIV/0!
Si	6.56253	6.52198	6.41388	6.22776	6.30296	6.2228	6.18277	6.20773	6.50726	6.04583	5.96015	5.93281	5.98871	5.83286	5.96541	5.90564	4.92783	6.84347	5.89529	5.93198	6.04559	5.33296	#DIV/0!	#DIV/0!	#DIV/0!	#DIV/0!	#DIV/0!	#DIV/0!	#DIV/0!	#DIV/0!	#DIV/0!	#DIV/0!	#DIV/0!	#DIV/0!	#DIV/0!	#DIV/0!	#DIV/0!	#DIV/0!	#DIV/0!	#DIV/0!	#DIV/0!	#DIV/0!	#DIV/0!	#DIV/0!	#DIV/0!	#DIV/0!	#DIV/0!	#DIV/0!	#DIV/0!
Ti	0.274433	0.246581	0.265814	0.241214	0.214577	0.227734	0.428003	0.421124	0.203968	0.251965	0.203129	0.215414	0.23703	0.317951	0.296219	0.289339	0.371302	0	0.28511	0.297951	0.251986	0	#DIV/0!	#DIV/0!	#DIV/0!	#DIV/0!	#DIV/0!	#DIV/0!	#DIV/0!	#DIV/0!	#DIV/0!	#DIV/0!	#DIV/0!	#DIV/0!	#DIV/0!	#DIV/0!	#DIV/0!	#DIV/0!	#DIV/0!	#DIV/0!	#DIV/0!	#DIV/0!	#DIV/0!	#DIV/0!	#DIV/0!	#DIV/0!	#DIV/0!	#DIV/0!	#DIV/0!
Al	1.54275	1.54177	1.72176	1.96332	1.878	1.96177	1.8006	1.77409	1.67842	2.15964	2.24228	2.33364	2.24114	2.49204	2.34081	2.43798	2.87663	6.14744	2.44415	2.38108	2.1593	2.01681	#DIV/0!	#DIV/0!	#DIV/0!	#DIV/0!	#DIV/0!	#DIV/0!	#DIV/0!	#DIV/0!	#DIV/0!	#DIV/0!	#DIV/0!	#DIV/0!	#DIV/0!	#DIV/0!	#DIV/0!	#DIV/0!	#DIV/0!	#DIV/0!	#DIV/0!	#DIV/0!	#DIV/0!	#DIV/0!	#DIV/0!	#DIV/0!	#DIV/0!	#DIV/0!	#DIV/0!
Cr	0.00300538	0	0.0033006	0.00373893	0.00420592	0.00212711	0.00565408	0.00541723	0.0138053	0	0	0.00116741	0.00117549	0	0.00234689	0.000467818	0.00718204	0	0	0	0	0	#DIV/0!	#DIV/0!	#DIV/0!	#DIV/0!	#DIV/0!	#DIV/0!	#DIV/0!	#DIV/0!	#DIV/0!	#DIV/0!	#DIV/0!	#DIV/0!	#DIV/0!	#DIV/0!	#DIV/0!	#DIV/0!	#DIV/0!	#DIV/0!	#DIV/0!	#DIV/0!	#DIV/0!	#DIV/0!	#DIV/0!	#DIV/0!	#DIV/0!	#DIV/0!	#DIV/0!
Fe	1.53062	1.53771	1.5518	1.45485	1.45894	1.45214	1.48116	1.46931	1.34734	1.59443	1.41061	1.50772	1.52313	1.39505	1.31022	1.3817	1.44327	0.00909199	1.3821	1.34173	1.59419	1.19192	#DIV/0!	#DIV/0!	#DIV/0!	#DIV/0!	#DIV/0!	#DIV/0!	#DIV/0!	#DIV/0!	#DIV/0!	#DIV/0!	#DIV/0!	#DIV/0!	#DIV/0!	#DIV/0!	#DIV/0!	#DIV/0!	#DIV/0!	#DIV/0!	#DIV/0!	#DIV/0!	#DIV/0!	#DIV/0!	#DIV/0!	#DIV/0!	#DIV/0!	#DIV/0!	#DIV/0!
Mn	0.0287583	0.0247537	0.0184839	0.0413721	0.0269267	0.0320821	0.0301432	0.0250715	0.0152239	0.0351603	0.014921	0.0200104	0.0277047	0.0292365	0.0247652	0.0236806	0.0228457	0	0.0286387	0.0292526	0.0352888	0.0916823	#DIV/0!	#DIV/0!	#DIV/0!	#DIV/0!	#DIV/0!	#DIV/0!	#DIV/0!	#DIV/0!	#DIV/0!	#DIV/0!	#DIV/0!	#DIV/0!	#DIV/0!	#DIV/0!	#DIV/0!	#DIV/0!	#DIV/0!	#DIV/0!	#DIV/0!	#DIV/0!	#DIV/0!	#DIV/0!	#DIV/0!	#DIV/0!	#DIV/0!	#DIV/0!	#DIV/0!
Mg	3.05791	3.12721	3.02497	3.06774	3.1144	3.10135	3.07167	3.09726	3.23398	2.91296	3.16891	2.98924	2.9811	2.93286	3.06023	2.96119	3.35093	0	2.96472	3.01801	2.91365	4.36663	#DIV/0!	#DIV/0!	#DIV/0!	#DIV/0!	#DIV/0!	#DIV/0!	#DIV/0!	#DIV/0!	#DIV/0!	#DIV/0!	#DIV/0!	#DIV/0!	#DIV/0!	#DIV/0!	#DIV/0!	#DIV/0!	#DIV/0!	#DIV/0!	#DIV/0!	#DIV/0!	#DIV/0!	#DIV/0!	#DIV/0!	#DIV/0!	#DIV/0!	#DIV/0!	#DIV/0!
Ca	1.74957	1.71631	1.71583	1.73007	1.71134	1.7062	1.71461	1.70503	1.72205	1.91882	1.9299	1.94429	1.94022	1.99351	1.92222	1.91884	0.00928349	2.24379	1.85841	1.93813	1.91866	0.140999	#DIV/0!	#DIV/0!	#DIV/0!	#DIV/0!	#DIV/0!	#DIV/0!	#DIV/0!	#DIV/0!	#DIV/0!	#DIV/0!	#DIV/0!	#DIV/0!	#DIV/0!	#DIV/0!	#DIV/0!	#DIV/0!	#DIV/0!	#DIV/0!	#DIV/0!	#DIV/0!	#DIV/0!	#DIV/0!	#DIV/0!	#DIV/0!	#DIV/0!	#DIV/0!	#DIV/0!
Na	0.570295	0.521924	0.562653	0.653336	0.602643	0.620523	0.743616	0.706737	0.560532	0.747354	0.77703	0.755785	0.792722	0.668659	0.691781	0.675428	0.398582	1.34565	0.679215	0.689728	0.746266	0.0162923	#DIV/0!	#DIV/0!	#DIV/0!	#DIV/0!	#DIV/0!	#DIV/0!	#DIV/0!	#DIV/0!	#DIV/0!	#DIV/0!	#DIV/0!	#DIV/0!	#DIV/0!	#DIV/0!	#DIV/0!	#DIV/0!	#DIV/0!	#DIV/0!	#DIV/0!	#DIV/0!	#DIV/0!	#DIV/0!	#DIV/0!	#DIV/0!	#DIV/0!	#DIV/0!	#DIV/0!
K	0.11423	0.102965	0.109286	0.106559	0.100628	0.107806	0.175552	0.16908	0.0954443	0.264788	0.239719	0.231695	0.244678	0.310554	0.309577	0.293073	1.42309	0.000447406	0.289753	0.297449	0.264999	0.0456059	#DIV/0!	#DIV/0!	#DIV/0!	#DIV/0!	#DIV/0!	#DIV/0!	#DIV/0!	#DIV/0!	#DIV/0!	#DIV/0!	#DIV/0!	#DIV/0!	#DIV/0!	#DIV/0!	#DIV/0!	#DIV/0!	#DIV/0!	#DIV/0!	#DIV/0!	#DIV/0!	#DIV/0!	#DIV/0!	#DIV/0!	#DIV/0!	#DIV/0!	#DIV/0!	#DIV/0!
Tot	15.4341	15.3412	15.3878	15.49	15.4146	15.4345	15.6338	15.5808	15.378	15.931	15.9466	15.9318	15.9776	15.9727	15.9236	15.8873	14.831	16.5899	15.8274	15.9253	15.9299	13.2029	#DIV/0!	#DIV/0!	#DIV/0!	#DIV/0!	#DIV/0!	#DIV/0!	#DIV/0!	#DIV/0!	#DIV/0!	#DIV/0!	#DIV/0!	#DIV/0!	#DIV/0!	#DIV/0!	#DIV/0!	#DIV/0!	#DIV/0!	#DIV/0!	#DIV/0!	#DIV/0!	#DIV/0!	#DIV/0!	#DIV/0!	#DIV/0!	#DIV/0!	#DIV/0!	#DIV/0!
F	0.0762627	0.119017	0.0894775	0.0612954	0.0710146	0.0811475	0.222538	0.210382	0	0	0	0	0	0	0	0	0	0	0	0	0	0	#DIV/0!	#DIV/0!	#DIV/0!	#DIV/0!	#DIV/0!	#DIV/0!	#DIV/0!	#DIV/0!	#DIV/0!	#DIV/0!	#DIV/0!	#DIV/0!	#DIV/0!	#DIV/0!	#DIV/0!	#DIV/0!	#DIV/0!	#DIV/0!	#DIV/0!	#DIV/0!	#DIV/0!	#DIV/0!	#DIV/0!	#DIV/0!	#DIV/0!	#DIV/0!	#DIV/0!
Cl	0.0166973	0.0181945	0.0137092	0.01062	0.0130163	0.0101725	0.0281225	0.0228282	0	0	0	0	0	0	0	0	0	0	0	0	0	0	#DIV/0!	#DIV/0!	#DIV/0!	#DIV/0!	#DIV/0!	#DIV/0!	#DIV/0!	#DIV/0!	#DIV/0!	#DIV/0!	#DIV/0!	#DIV/0!	#DIV/0!	#DIV/0!	#DIV/0!	#DIV/0!	#DIV/0!	#DIV/0!	#DIV/0!	#DIV/0!	#DIV/0!	#DIV/0!	#DIV/0!	#DIV/0!	#DIV/0!	#DIV/0!	#DIV/0!
OHcalc	1.90704	1.86279	1.89681	1.92808	1.91597	1.90868	1.74934	1.76679	2	2	2	2	2	2	2	2	2	2	2	2	2	2	#DIV/0!	#DIV/0!	#DIV/0!	#DIV/0!	#DIV/0!	#DIV/0!	#DIV/0!	#DIV/0!	#DIV/0!	#DIV/0!	#DIV/0!	#DIV/0!	#DIV/0!	#DIV/0!	#DIV/0!	#DIV/0!	#DIV/0!	#DIV/0!	#DIV/0!	#DIV/0!	#DIV/0!	#DIV/0!	#DIV/0!	#DIV/0!	#DIV/0!	#DIV/0!	#DIV/0!
15(Si+Al+Cr+Ti+Fe+Mg+Mn+Ca)	14.9434	14.9979	14.9803	15.0157	15.0238	15.0311	14.9169	14.9246	14.9777	15.048	15.1121	15.1061	15.0674	15.0722	15.0162	15.0383	14.4819	13.5715	15.0248	15.0348	15.0485	15.4891	#DIV/0!	#DIV/0!	#DIV/0!	#DIV/0!	#DIV/0!	#DIV/0!	#DIV/0!	#DIV/0!	#DIV/0!	#DIV/0!	#DIV/0!	#DIV/0!	#DIV/0!	#DIV/0!	#DIV/0!	#DIV/0!	#DIV/0!	#DIV/0!	#DIV/0!	#DIV/0!	#DIV/0!	#DIV/0!	#DIV/0!	#DIV/0!	#DIV/0!	#DIV/0!	#DIV/0!
Si	6.67395	6.64771	6.53773	6.34189	6.42663	6.34712	6.30268	6.33226	6.63011	6.07873	5.98813	5.95492	6.01268	5.83538	5.9965	5.93777	5.6819	6.73402	5.95146	5.95655	6.07855	6.08739	#DIV/0!	#DIV/0!	#DIV/0!	#DIV/0!	#DIV/0!	#DIV/0!	#DIV/0!	#DIV/0!	#DIV/0!	#DIV/0!	#DIV/0!	#DIV/0!	#DIV/0!	#DIV/0!	#DIV/0!	#DIV/0!	#DIV/0!	#DIV/0!	#DIV/0!	#DIV/0!	#DIV/0!	#DIV/0!	#DIV/0!	#DIV/0!	#DIV/0!	#DIV/0!	#DIV/0!
Ti	0.279092	0.251335	0.270947	0.245635	0.218787	0.232284	0.436304	0.429572	0.207819	0.253336	0.204083	0.216217	0.237978	0.318088	0.297764	0.290913	0.42812	0	0.287827	0.299185	0.25336	0	#DIV/0!	#DIV/0!	#DIV/0!	#DIV/0!	#DIV/0!	#DIV/0!	#DIV/0!	#DIV/0!	#DIV/0!	#DIV/0!	#DIV/0!	#DIV/0!	#DIV/0!	#DIV/0!	#DIV/0!	#DIV/0!	#DIV/0!	#DIV/0!	#DIV/0!	#DIV/0!	#DIV/0!	#DIV/0!	#DIV/0!	#DIV/0!	#DIV/0!	#DIV/0!	#DIV/0!
Al	1.56894	1.57149	1.75501	1.9993	1.91484	2.00096	1.83552	1.80968	1.71011	2.1714	2.25281	2.34234	2.25011	2.49312	2.35301	2.45124	3.31682	6.04912	2.46744	2.39094	2.17107	2.30212	#DIV/0!	#DIV/0!	#DIV/0!	#DIV/0!	#DIV/0!	#DIV/0!	#DIV/0!	#DIV/0!	#DIV/0!	#DIV/0!	#DIV/0!	#DIV/0!	#DIV/0!	#DIV/0!	#DIV/0!	#DIV/0!	#DIV/0!	#DIV/0!	#DIV/0!	#DIV/0!	#DIV/0!	#DIV/0!	#DIV/0!	#DIV/0!	#DIV/0!	#DIV/0!	#DIV/0!
Cr	0.00305641	0	0.00336434	0.00380745	0.00428845	0.00216961	0.00576373	0.0055259	0.0140659	0	0	0.00117176	0.00118019	0	0.00235912	0.000470363	0.00828105	0	0	0	0	0	#DIV/0!	#DIV/0!	#DIV/0!	#DIV/0!	#DIV/0!	#DIV/0!	#DIV/0!	#DIV/0!	#DIV/0!	#DIV/0!	#DIV/0!	#DIV/0!	#DIV/0!	#DIV/0!	#DIV/0!	#DIV/0!	#DIV/0!	#DIV/0!	#DIV/0!	#DIV/0!	#DIV/0!	#DIV/0!	#DIV/0!	#DIV/0!	#DIV/0!	#DIV/0!	#DIV/0!
Fe	1.55661	1.56735	1.58176	1.48151	1.48756	1.48115	1.50989	1.49878	1.37278	1.60311	1.41723	1.51335	1.52922	1.39566	1.31705	1.38922	1.66413	0.00894658	1.39527	1.34729	1.60288	1.36053	#DIV/0!	#DIV/0!	#DIV/0!	#DIV/0!	#DIV/0!	#DIV/0!	#DIV/0!	#DIV/0!	#DIV/0!	#DIV/0!	#DIV/0!	#DIV/0!	#DIV/0!	#DIV/0!	#DIV/0!	#DIV/0!	#DIV/0!	#DIV/0!	#DIV/0!	#DIV/0!	#DIV/0!	#DIV/0!	#DIV/0!	#DIV/0!	#DIV/0!	#DIV/0!	#DIV/0!
Mn	0.0292466	0.0252309	0.0188408	0.0421303	0.0274551	0.0327231	0.0307279	0.0255744	0.0155114	0.0353517	0.0149911	0.020085	0.0278155	0.0292492	0.0248943	0.0238094	0.0263416	0	0.0289116	0.0293738	0.0354812	0.104652	#DIV/0!	#DIV/0!	#DIV/0!	#DIV/0!	#DIV/0!	#DIV/0!	#DIV/0!	#DIV/0!	#DIV/0!	#DIV/0!	#DIV/0!	#DIV/0!	#DIV/0!	#DIV/0!	#DIV/0!	#DIV/0!	#DIV/0!	#DIV/0!	#DIV/0!	#DIV/0!	#DIV/0!	#DIV/0!	#DIV/0!	#DIV/0!	#DIV/0!	#DIV/0!	#DIV/0!
Mg	3.10983	3.18749	3.08338	3.12396	3.17551	3.16331	3.13125	3.15938	3.29504	2.92881	3.18379	3.00038	2.99303	2.93413	3.07618	2.9773	3.8637	0	2.99297	3.03051	2.92953	4.98436	#DIV/0!	#DIV/0!	#DIV/0!	#DIV/0!	#DIV/0!	#DIV/0!	#DIV/0!	#DIV/0!	#DIV/0!	#DIV/0!	#DIV/0!	#DIV/0!	#DIV/0!	#DIV/0!	#DIV/0!	#DIV/0!	#DIV/0!	#DIV/0!	#DIV/0!	#DIV/0!	#DIV/0!	#DIV/0!	#DIV/0!	#DIV/0!	#DIV/0!	#DIV/0!	#DIV/0!
Ca	1.77928	1.74939	1.74897	1.76177	1.74492	1.74029	1.74787	1.73923	1.75456	1.92926	1.93896	1.95154	1.94798	1.99437	1.93224	1.92928	0.0107041	2.20791	1.87612	1.94616	1.92912	0.160946	#DIV/0!	#DIV/0!	#DIV/0!	#DIV/0!	#DIV/0!	#DIV/0!	#DIV/0!	#DIV/0!	#DIV/0!	#DIV/0!	#DIV/0!	#DIV/0!	#DIV/0!	#DIV/0!	#DIV/0!	#DIV/0!	#DIV/0!	#DIV/0!	#DIV/0!	#DIV/0!	#DIV/0!	#DIV/0!	#DIV/0!	#DIV/0!	#DIV/0!	#DIV/0!	#DIV/0!
Na	0.579978	0.531985	0.573518	0.665308	0.614468	0.63292	0.758038	0.720914	0.571115	0.751421	0.780678	0.758603	0.795895	0.668948	0.695387	0.679102	0.459574	1.32413	0.685687	0.692585	0.750335	0.0185971	#DIV/0!	#DIV/0!	#DIV/0!	#DIV/0!	#DIV/0!	#DIV/0!	#DIV/0!	#DIV/0!	#DIV/0!	#DIV/0!	#DIV/0!	#DIV/0!	#DIV/0!	#DIV/0!	#DIV/0!	#DIV/0!	#DIV/0!	#DIV/0!	#DIV/0!	#DIV/0!	#DIV/0!	#DIV/0!	#DIV/0!	#DIV/0!	#DIV/0!	#DIV/0!	#DIV/0!
K	0.116169	0.10495	0.111396	0.108512	0.102603	0.109959	0.178957	0.172472	0.0972463	0.266229	0.240844	0.232559	0.245657	0.310689	0.311191	0.294668	1.64086	0.000440251	0.292514	0.298681	0.266444	0.0520575	#DIV/0!	#DIV/0!	#DIV/0!	#DIV/0!	#DIV/0!	#DIV/0!	#DIV/0!	#DIV/0!	#DIV/0!	#DIV/0!	#DIV/0!	#DIV/0!	#DIV/0!	#DIV/0!	#DIV/0!	#DIV/0!	#DIV/0!	#DIV/0!	#DIV/0!	#DIV/0!	#DIV/0!	#DIV/0!	#DIV/0!	#DIV/0!	#DIV/0!	#DIV/0!	#DIV/0!
Tot	15.6961	15.6369	15.6849	15.7738	15.7171	15.7429	15.937	15.8934	15.6684	16.0176	16.0215	15.9912	16.0416	15.9796	16.0066	15.9738	17.1004	16.3246	15.9782	15.9913	16.0168	15.0707	#DIV/0!	#DIV/0!	#DIV/0!	#DIV/0!	#DIV/0!	#DIV/0!	#DIV/0!	#DIV/0!	#DIV/0!	#DIV/0!	#DIV/0!	#DIV/0!	#DIV/0!	#DIV/0!	#DIV/0!	#DIV/0!	#DIV/0!	#DIV/0!	#DIV/0!	#DIV/0!	#DIV/0!	#DIV/0!	#DIV/0!	#DIV/0!	#DIV/0!	#DIV/0!	#DIV/0!
F	0.0775575	0.121311	0.0912053	0.0624186	0.072408	0.0827687	0.226854	0.214602	0	0	0	0	0	0	0	0	0	0	0	0	0	0	#DIV/0!	#DIV/0!	#DIV/0!	#DIV/0!	#DIV/0!	#DIV/0!	#DIV/0!	#DIV/0!	#DIV/0!	#DIV/0!	#DIV/0!	#DIV/0!	#DIV/0!	#DIV/0!	#DIV/0!	#DIV/0!	#DIV/0!	#DIV/0!	#DIV/0!	#DIV/0!	#DIV/0!	#DIV/0!	#DIV/0!	#DIV/0!	#DIV/0!	#DIV/0!	#DIV/0!
Cl	0.0169808	0.0185453	0.0139739	0.0108146	0.0132717	0.0103757	0.0286679	0.0232861	0	0	0	0	0	0	0	0	0	0	0	0	0	0	#DIV/0!	#DIV/0!	#DIV/0!	#DIV/0!	#DIV/0!	#DIV/0!	#DIV/0!	#DIV/0!	#DIV/0!	#DIV/0!	#DIV/0!	#DIV/0!	#DIV/0!	#DIV/0!	#DIV/0!	#DIV/0!	#DIV/0!	#DIV/0!	#DIV/0!	#DIV/0!	#DIV/0!	#DIV/0!	#DIV/0!	#DIV/0!	#DIV/0!	#DIV/0!	#DIV/0!
OHcalc	1.90546	1.86014	1.89482	1.92677	1.91432	1.90686	1.74448	1.76211	2	2	2	2	2	2	2	2	2	2	2	2	2	2	#DIV/0!	#DIV/0!	#DIV/0!	#DIV/0!	#DIV/0!	#DIV/0!	#DIV/0!	#DIV/0!	#DIV/0!	#DIV/0!	#DIV/0!	#DIV/0!	#DIV/0!	#DIV/0!	#DIV/0!	#DIV/0!	#DIV/0!	#DIV/0!	#DIV/0!	#DIV/0!	#DIV/0!	#DIV/0!	#DIV/0!	#DIV/0!	#DIV/0!	#DIV/0!	#DIV/0!
Charges+	45.4033	45.1364	45.188	45.125	45.0432	45.0057	45.3762	45.3231	45.2148	45.605	45.4454	45.5073	45.6116	45.7599	45.7122	45.6346	47.6456	51.6681	45.4907	45.7044	45.603	44.5476	#DIV/0!	#DIV/0!	#DIV/0!	#DIV/0!	#DIV/0!	#DIV/0!	#DIV/0!	#DIV/0!	#DIV/0!	#DIV/0!	#DIV/0!	#DIV/0!	#DIV/0!	#DIV/0!	#DIV/0!	#DIV/0!	#DIV/0!	#DIV/0!	#DIV/0!	#DIV/0!	#DIV/0!	#DIV/0!	#DIV/0!	#DIV/0!	#DIV/0!	#DIV/0!	#DIV/0!
Si	6.56253	6.52198	6.41388	6.22776	6.30296	6.2228	6.18277	6.20773	6.50726	6.04583	5.96015	5.93281	5.98871	5.83286	5.96541	5.90564	4.92783	6.84347	5.89529	5.93198	6.04559	6.08739	#DIV/0!	#DIV/0!	#DIV/0!	#DIV/0!	#DIV/0!	#DIV/0!	#DIV/0!	#DIV/0!	#DIV/0!	#DIV/0!	#DIV/0!	#DIV/0!	#DIV/0!	#DIV/0!	#DIV/0!	#DIV/0!	#DIV/0!	#DIV/0!	#DIV/0!	#DIV/0!	#DIV/0!	#DIV/0!	#DIV/0!	#DIV/0!	#DIV/0!	#DIV/0!	#DIV/0!
Ti	0.274433	0.246581	0.265814	0.241214	0.214577	0.227734	0.428003	0.421124	0.203968	0.251965	0.203129	0.215414	0.23703	0.317951	0.296219	0.289339	0.371302	0	0.28511	0.297951	0.251986	0	#DIV/0!	#DIV/0!	#DIV/0!	#DIV/0!	#DIV/0!	#DIV/0!	#DIV/0!	#DIV/0!	#DIV/0!	#DIV/0!	#DIV/0!	#DIV/0!	#DIV/0!	#DIV/0!	#DIV/0!	#DIV/0!	#DIV/0!	#DIV/0!	#DIV/0!	#DIV/0!	#DIV/0!	#DIV/0!	#DIV/0!	#DIV/0!	#DIV/0!	#DIV/0!	#DIV/0!
Al	1.54275	1.54177	1.72176	1.96332	1.878	1.96177	1.8006	1.77409	1.67842	2.15964	2.24228	2.33364	2.24114	2.49204	2.34081	2.43798	2.87663	6.14744	2.44415	2.38108	2.1593	2.30212	#DIV/0!	#DIV/0!	#DIV/0!	#DIV/0!	#DIV/0!	#DIV/0!	#DIV/0!	#DIV/0!	#DIV/0!	#DIV/0!	#DIV/0!	#DIV/0!	#DIV/0!	#DIV/0!	#DIV/0!	#DIV/0!	#DIV/0!	#DIV/0!	#DIV/0!	#DIV/0!	#DIV/0!	#DIV/0!	#DIV/0!	#DIV/0!	#DIV/0!	#DIV/0!	#DIV/0!
Cr	0.00300538	0	0.0033006	0.00373893	0.00420592	0.00212711	0.00565408	0.00541723	0.0138053	0	0	0.00116741	0.00117549	0	0.00234689	0.000467818	0.00718204	0	0	0	0	0	#DIV/0!	#DIV/0!	#DIV/0!	#DIV/0!	#DIV/0!	#DIV/0!	#DIV/0!	#DIV/0!	#DIV/0!	#DIV/0!	#DIV/0!	#DIV/0!	#DIV/0!	#DIV/0!	#DIV/0!	#DIV/0!	#DIV/0!	#DIV/0!	#DIV/0!	#DIV/0!	#DIV/0!	#DIV/0!	#DIV/0!	#DIV/0!	#DIV/0!	#DIV/0!	#DIV/0!
Fe3+	0.596661	0.863601	0.81195	0.874952	0.956777	0.994312	0.62381	0.676913	0.785248	0.394973	0.554628	0.492698	0.38836	0.240107	0.287795	0.365405	0	0	0.509259	0.295624	0.396963	1.45245	#DIV/0!	#DIV/0!	#DIV/0!	#DIV/0!	#DIV/0!	#DIV/0!	#DIV/0!	#DIV/0!	#DIV/0!	#DIV/0!	#DIV/0!	#DIV/0!	#DIV/0!	#DIV/0!	#DIV/0!	#DIV/0!	#DIV/0!	#DIV/0!	#DIV/0!	#DIV/0!	#DIV/0!	#DIV/0!	#DIV/0!	#DIV/0!	#DIV/0!	#DIV/0!	#DIV/0!
Fe2+	0.933959	0.674106	0.739846	0.579897	0.50216	0.457824	0.857352	0.792399	0.562092	1.19946	0.855983	1.01503	1.13477	1.15494	1.02243	1.0163	1.44327	0.00909199	0.872838	1.04611	1.19723	-0.0919133	#DIV/0!	#DIV/0!	#DIV/0!	#DIV/0!	#DIV/0!	#DIV/0!	#DIV/0!	#DIV/0!	#DIV/0!	#DIV/0!	#DIV/0!	#DIV/0!	#DIV/0!	#DIV/0!	#DIV/0!	#DIV/0!	#DIV/0!	#DIV/0!	#DIV/0!	#DIV/0!	#DIV/0!	#DIV/0!	#DIV/0!	#DIV/0!	#DIV/0!	#DIV/0!	#DIV/0!
Mn	0.0287583	0.0247537	0.0184839	0.0413721	0.0269267	0.0320821	0.0301432	0.0250715	0.0152239	0.0351603	0.014921	0.0200104	0.0277047	0.0292365	0.0247652	0.0236806	0.0228457	0	0.0286387	0.0292526	0.0352888	0.104652	#DIV/0!	#DIV/0!	#DIV/0!	#DIV/0!	#DIV/0!	#DIV/0!	#DIV/0!	#DIV/0!	#DIV/0!	#DIV/0!	#DIV/0!	#DIV/0!	#DIV/0!	#DIV/0!	#DIV/0!	#DIV/0!	#DIV/0!	#DIV/0!	#DIV/0!	#DIV/0!	#DIV/0!	#DIV/0!	#DIV/0!	#DIV/0!	#DIV/0!	#DIV/0!	#DIV/0!
Mg	3.05791	3.12721	3.02497	3.06774	3.1144	3.10135	3.07167	3.09726	3.23398	2.91296	3.16891	2.98924	2.9811	2.93286	3.06023	2.96119	3.35093	0	2.96472	3.01801	2.91365	4.98436	#DIV/0!	#DIV/0!	#DIV/0!	#DIV/0!	#DIV/0!	#DIV/0!	#DIV/0!	#DIV/0!	#DIV/0!	#DIV/0!	#DIV/0!	#DIV/0!	#DIV/0!	#DIV/0!	#DIV/0!	#DIV/0!	#DIV/0!	#DIV/0!	#DIV/0!	#DIV/0!	#DIV/0!	#DIV/0!	#DIV/0!	#DIV/0!	#DIV/0!	#DIV/0!	#DIV/0!
Ca	1.74957	1.71631	1.71583	1.73007	1.71134	1.7062	1.71461	1.70503	1.72205	1.91882	1.9299	1.94429	1.94022	1.99351	1.92222	1.91884	0.00928349	2.24379	1.85841	1.93813	1.91866	0.160946	#DIV/0!	#DIV/0!	#DIV/0!	#DIV/0!	#DIV/0!	#DIV/0!	#DIV/0!	#DIV/0!	#DIV/0!	#DIV/0!	#DIV/0!	#DIV/0!	#DIV/0!	#DIV/0!	#DIV/0!	#DIV/0!	#DIV/0!	#DIV/0!	#DIV/0!	#DIV/0!	#DIV/0!	#DIV/0!	#DIV/0!	#DIV/0!	#DIV/0!	#DIV/0!	#DIV/0!
Na	0.570295	0.521924	0.562653	0.653336	0.602643	0.620523	0.743616	0.706737	0.560532	0.747354	0.77703	0.755785	0.792722	0.668659	0.691781	0.675428	0.398582	1.34565	0.679215	0.689728	0.746266	0.0185971	#DIV/0!	#DIV/0!	#DIV/0!	#DIV/0!	#DIV/0!	#DIV/0!	#DIV/0!	#DIV/0!	#DIV/0!	#DIV/0!	#DIV/0!	#DIV/0!	#DIV/0!	#DIV/0!	#DIV/0!	#DIV/0!	#DIV/0!	#DIV/0!	#DIV/0!	#DIV/0!	#DIV/0!	#DIV/0!	#DIV/0!	#DIV/0!	#DIV/0!	#DIV/0!	#DIV/0!
K	0.11423	0.102965	0.109286	0.106559	0.100628	0.107806	0.175552	0.16908	0.0954443	0.264788	0.239719	0.231695	0.244678	0.310554	0.309577	0.293073	1.42309	0.000447406	0.289753	0.297449	0.264999	0.0520575	#DIV/0!	#DIV/0!	#DIV/0!	#DIV/0!	#DIV/0!	#DIV/0!	#DIV/0!	#DIV/0!	#DIV/0!	#DIV/0!	#DIV/0!	#DIV/0!	#DIV/0!	#DIV/0!	#DIV/0!	#DIV/0!	#DIV/0!	#DIV/0!	#DIV/0!	#DIV/0!	#DIV/0!	#DIV/0!	#DIV/0!	#DIV/0!	#DIV/0!	#DIV/0!	#DIV/0!
Tot	15.4341	15.3412	15.3878	15.49	15.4146	15.4345	15.6338	15.5808	15.378	15.931	15.9466	15.9318	15.9776	15.9727	15.9236	15.8873	14.831	16.5899	15.8274	15.9253	15.9299	15.0707	#DIV/0!	#DIV/0!	#DIV/0!	#DIV/0!	#DIV/0!	#DIV/0!	#DIV/0!	#DIV/0!	#DIV/0!	#DIV/0!	#DIV/0!	#DIV/0!	#DIV/0!	#DIV/0!	#DIV/0!	#DIV/0!	#DIV/0!	#DIV/0!	#DIV/0!	#DIV/0!	#DIV/0!	#DIV/0!	#DIV/0!	#DIV/0!	#DIV/0!	#DIV/0!	#DIV/0!
Total check	ok	ok	ok	ok	ok	ok	ok	ok	ok	ok	ok	ok	ok	ok	ok	ok	wrong	wrong	ok	ok	ok	wrong
Al#	0.0682358	0.0413498	0.0787783	0.0973286	0.0963532	0.0940819	0	0	0.110627	0.0951444	0.0902779	0.114175	0.102563	0.130374	0.130816	0.140945	0	0.811868	0.138877	0.131476	0.0948863	0.169196
Species	Mg-Hbl	Mg-Hbl	Tsch-Prg	Tsch-Prg	Tsch-Prg	Tsch-Prg	Mg-Hst	Mg-Hst	Mg-Hbl	Mg-Hst	Mg-Hst	Mg-Hst	Mg-Hst	Mg-Hst	Mg-Hst	Mg-Hst	low-Ca	invalid	Mg-Hst	Mg-Hst	Mg-Hst	low-Ca
Physical-chemical conditions
T (°C)	876.451	873.913	898.143	941.637	922.637	937.828	953.417	946.818	890.852	998.072	1019.83	1024.56	1015.01	1056.47	1029.15	1036.53	invalid	invalid	1031.73	1035.19	998.034	invalid
uncertanty (σest)	22	22	22	22	22	22	22	22	22	22	22	22	22	22	22	22	invalid	invalid	22	22	22	invalid
P (MPa)	176.593	176.345	228.439	323.319	285.984	322.596	255.861	246.292	214.638	428.781	482.887	550.679	482.095	691.546	556.384	639.825	invalid	invalid	645.529	589.553	428.568	invalid
uncertanty (Max error)	19.4252	19.3979	25.1283	35.5651	31.4582	35.4856	28.1447	27.0921	23.6102	47.166	53.1176	60.5747	53.0305	76.0701	61.2022	70.3807	invalid	invalid	71.0082	64.8509	47.1425	invalid
oceanic depth (km)	6.23095	6.22219	8.06031	11.4081	10.0907	11.3826	9.02788	8.69024	7.57334	15.1293	17.0383	19.4303	17.0104	24.4007	19.6316	22.5758	invalid	invalid	22.777	20.802	15.1217	invalid
continental depth (km)	6.66943	6.66005	8.62751	12.2109	10.8008	12.1836	9.66317	9.30178	8.10628	16.1939	18.2373	20.7976	18.2074	26.1178	21.0131	24.1644	invalid	invalid	24.3799	22.2658	16.1858	invalid
∆NNO	0.967704	1.25051	0.990591	0.993811	1.19905	1.13818	0.578538	0.679761	1.39122	0.432144	0.88965	0.583543	0.497213	0.200673	0.486497	0.380131	invalid	invalid	0.462533	0.412185	0.434424	invalid
logfO2	-11.3497	-11.1138	-10.9142	-10.1322	-10.2585	-10.0509	-10.3811	-10.3905	-10.6491	-9.77005	-8.97334	-9.18741	-9.43592	-9.07605	-9.21703	-9.18983	invalid	invalid	-9.17294	-9.19421	-9.76842	invalid
uncertanty (σest)	0.4	0.4	0.4	0.4	0.4	0.4	0.4	0.4	0.4	0.4	0.4	0.4	0.4	0.4	0.4	0.4	invalid	invalid	0.4	0.4	0.4	invalid
H2Omelt (wt.%)	4.56322	4.68648	5.24014	5.7594	5.72687	5.79125	3.22087	3.34254	5.30998	3.98317	4.10423	4.9559	4.29719	4.72232	4.08409	4.86519	invalid	invalid	4.91	4.43466	3.9805	invalid
uncertanty*	0.4	0.4	0.786021	0.863909	0.859031	0.868687	0.483131	0.501382	0.4	0.597476	0.615634	0.743385	0.644579	0.708347	0.612613	0.729779	invalid	invalid	0.736501	0.665199	0.597074	invalid
Formula on the basis of 13 cations (Leake et al 1997)
Si	6.56253	6.52198	6.41388	6.22776	6.30296	6.2228	6.18277	6.20773	6.50726	6.04583	5.96015	5.93281	5.98871	5.83286	5.96541	5.90564	4.92783	6.84347	5.89529	5.93198	6.04559	6.08739	#DIV/0!	#DIV/0!	#DIV/0!	#DIV/0!	#DIV/0!	#DIV/0!	#DIV/0!	#DIV/0!	#DIV/0!	#DIV/0!	#DIV/0!	#DIV/0!	#DIV/0!	#DIV/0!	#DIV/0!	#DIV/0!	#DIV/0!	#DIV/0!	#DIV/0!	#DIV/0!	#DIV/0!	#DIV/0!	#DIV/0!	#DIV/0!	#DIV/0!	#DIV/0!	#DIV/0!
AlIV	1.43747	1.47802	1.58612	1.77224	1.69704	1.7772	1.8006	1.77409	1.49274	1.95417	2.03985	2.06719	2.01129	2.16714	2.03459	2.09436	2.87663	1.15653	2.10471	2.06802	1.95441	1.91261	#DIV/0!	#DIV/0!	#DIV/0!	#DIV/0!	#DIV/0!	#DIV/0!	#DIV/0!	#DIV/0!	#DIV/0!	#DIV/0!	#DIV/0!	#DIV/0!	#DIV/0!	#DIV/0!	#DIV/0!	#DIV/0!	#DIV/0!	#DIV/0!	#DIV/0!	#DIV/0!	#DIV/0!	#DIV/0!	#DIV/0!	#DIV/0!	#DIV/0!	#DIV/0!	#DIV/0!
Ti	0	0	0	0	0	0	0.0166361	0.0181798	0	0	0	0	0	0	0	0	0.195538	0	0	0	0	0	#DIV/0!	#DIV/0!	#DIV/0!	#DIV/0!	#DIV/0!	#DIV/0!	#DIV/0!	#DIV/0!	#DIV/0!	#DIV/0!	#DIV/0!	#DIV/0!	#DIV/0!	#DIV/0!	#DIV/0!	#DIV/0!	#DIV/0!	#DIV/0!	#DIV/0!	#DIV/0!	#DIV/0!	#DIV/0!	#DIV/0!	#DIV/0!	#DIV/0!	#DIV/0!	#DIV/0!
Tsite	8	8	8	8	8	8	8	8	8	8	8	8	8	8	8	8	8	8	8	8	8	8	#DIV/0!	#DIV/0!	#DIV/0!	#DIV/0!	#DIV/0!	#DIV/0!	#DIV/0!	#DIV/0!	#DIV/0!	#DIV/0!	#DIV/0!	#DIV/0!	#DIV/0!	#DIV/0!	#DIV/0!	#DIV/0!	#DIV/0!	#DIV/0!	#DIV/0!	#DIV/0!	#DIV/0!	#DIV/0!	#DIV/0!	#DIV/0!	#DIV/0!	#DIV/0!	#DIV/0!
AlVI	0.10527	0.0637517	0.135637	0.191088	0.180951	0.184567	0	0	0.18568	0.205478	0.202429	0.266444	0.229857	0.324897	0.306215	0.343622	0	4.99091	0.339438	0.313055	0.204888	0.389508	#DIV/0!	#DIV/0!	#DIV/0!	#DIV/0!	#DIV/0!	#DIV/0!	#DIV/0!	#DIV/0!	#DIV/0!	#DIV/0!	#DIV/0!	#DIV/0!	#DIV/0!	#DIV/0!	#DIV/0!	#DIV/0!	#DIV/0!	#DIV/0!	#DIV/0!	#DIV/0!	#DIV/0!	#DIV/0!	#DIV/0!	#DIV/0!	#DIV/0!	#DIV/0!	#DIV/0!
Ti	0.274433	0.246581	0.265814	0.241214	0.214577	0.227734	0.411367	0.402945	0.203968	0.251965	0.203129	0.215414	0.23703	0.317951	0.296219	0.289339	0.175764	0	0.28511	0.297951	0.251986	0	#DIV/0!	#DIV/0!	#DIV/0!	#DIV/0!	#DIV/0!	#DIV/0!	#DIV/0!	#DIV/0!	#DIV/0!	#DIV/0!	#DIV/0!	#DIV/0!	#DIV/0!	#DIV/0!	#DIV/0!	#DIV/0!	#DIV/0!	#DIV/0!	#DIV/0!	#DIV/0!	#DIV/0!	#DIV/0!	#DIV/0!	#DIV/0!	#DIV/0!	#DIV/0!	#DIV/0!
Cr	0.00300538	0	0.0033006	0.00373893	0.00420592	0.00212711	0.00565408	0.00541723	0.0138053	0	0	0.00116741	0.00117549	0	0.00234689	0.000467818	0.00718204	0	0	0	0	0	#DIV/0!	#DIV/0!	#DIV/0!	#DIV/0!	#DIV/0!	#DIV/0!	#DIV/0!	#DIV/0!	#DIV/0!	#DIV/0!	#DIV/0!	#DIV/0!	#DIV/0!	#DIV/0!	#DIV/0!	#DIV/0!	#DIV/0!	#DIV/0!	#DIV/0!	#DIV/0!	#DIV/0!	#DIV/0!	#DIV/0!	#DIV/0!	#DIV/0!	#DIV/0!	#DIV/0!
Fe3+	0.596661	0.863601	0.81195	0.874952	0.956777	0.994312	0.62381	0.676913	0.785248	0.394973	0.554628	0.492698	0.38836	0.240107	0.287795	0.365405	0	0	0.509259	0.295624	0.396963	1.45245	#DIV/0!	#DIV/0!	#DIV/0!	#DIV/0!	#DIV/0!	#DIV/0!	#DIV/0!	#DIV/0!	#DIV/0!	#DIV/0!	#DIV/0!	#DIV/0!	#DIV/0!	#DIV/0!	#DIV/0!	#DIV/0!	#DIV/0!	#DIV/0!	#DIV/0!	#DIV/0!	#DIV/0!	#DIV/0!	#DIV/0!	#DIV/0!	#DIV/0!	#DIV/0!	#DIV/0!
Mg	3.05791	3.12721	3.02497	3.06774	3.1144	3.10135	3.07167	3.09726	3.23398	2.91296	3.16891	2.98924	2.9811	2.93286	3.06023	2.96119	3.35093	0	2.96472	3.01801	2.91365	4.98436	#DIV/0!	#DIV/0!	#DIV/0!	#DIV/0!	#DIV/0!	#DIV/0!	#DIV/0!	#DIV/0!	#DIV/0!	#DIV/0!	#DIV/0!	#DIV/0!	#DIV/0!	#DIV/0!	#DIV/0!	#DIV/0!	#DIV/0!	#DIV/0!	#DIV/0!	#DIV/0!	#DIV/0!	#DIV/0!	#DIV/0!	#DIV/0!	#DIV/0!	#DIV/0!	#DIV/0!
Fe2+	0.933959	0.674106	0.739846	0.579897	0.50216	0.457824	0.857352	0.792399	0.562092	1.19946	0.855983	1.01503	1.13477	1.15494	1.02243	1.0163	1.44327	0.00909199	0.872838	1.04611	1.19723	-1.93097	#DIV/0!	#DIV/0!	#DIV/0!	#DIV/0!	#DIV/0!	#DIV/0!	#DIV/0!	#DIV/0!	#DIV/0!	#DIV/0!	#DIV/0!	#DIV/0!	#DIV/0!	#DIV/0!	#DIV/0!	#DIV/0!	#DIV/0!	#DIV/0!	#DIV/0!	#DIV/0!	#DIV/0!	#DIV/0!	#DIV/0!	#DIV/0!	#DIV/0!	#DIV/0!	#DIV/0!
Mn	0.0287583	0.0247537	0.0184839	0.0413721	0.0269267	0.0320821	0.0301432	0.0250715	0.0152239	0.0351603	0.014921	0.0200104	0.0277047	0.0292365	0.0247652	0.0236806	0.0228457	0	0.0286387	0.0292526	0.0352888	0.104652	#DIV/0!	#DIV/0!	#DIV/0!	#DIV/0!	#DIV/0!	#DIV/0!	#DIV/0!	#DIV/0!	#DIV/0!	#DIV/0!	#DIV/0!	#DIV/0!	#DIV/0!	#DIV/0!	#DIV/0!	#DIV/0!	#DIV/0!	#DIV/0!	#DIV/0!	#DIV/0!	#DIV/0!	#DIV/0!	#DIV/0!	#DIV/0!	#DIV/0!	#DIV/0!	#DIV/0!
Csite	5	5	5	5	5	5	5	5	5	5	5	5	5	5	5	5	5	5	5	5	5	5	#DIV/0!	#DIV/0!	#DIV/0!	#DIV/0!	#DIV/0!	#DIV/0!	#DIV/0!	#DIV/0!	#DIV/0!	#DIV/0!	#DIV/0!	#DIV/0!	#DIV/0!	#DIV/0!	#DIV/0!	#DIV/0!	#DIV/0!	#DIV/0!	#DIV/0!	#DIV/0!	#DIV/0!	#DIV/0!	#DIV/0!	#DIV/0!	#DIV/0!	#DIV/0!	#DIV/0!
Fe2+	0	0	0	1.44329e-15	0	1.16573e-15	0	0	1.66533e-15	0	0	0	0	0	0	0	0	3.46945e-17	0	0	0	1.83905	#DIV/0!	#DIV/0!	#DIV/0!	#DIV/0!	#DIV/0!	#DIV/0!	#DIV/0!	#DIV/0!	#DIV/0!	#DIV/0!	#DIV/0!	#DIV/0!	#DIV/0!	#DIV/0!	#DIV/0!	#DIV/0!	#DIV/0!	#DIV/0!	#DIV/0!	#DIV/0!	#DIV/0!	#DIV/0!	#DIV/0!	#DIV/0!	#DIV/0!	#DIV/0!	#DIV/0!
Ca	1.74957	1.71631	1.71583	1.73007	1.71134	1.7062	1.71461	1.70503	1.72205	1.91882	1.9299	1.94429	1.94022	1.99351	1.92222	1.91884	0.00928349	2.24379	1.85841	1.93813	1.91866	0.160946	#DIV/0!	#DIV/0!	#DIV/0!	#DIV/0!	#DIV/0!	#DIV/0!	#DIV/0!	#DIV/0!	#DIV/0!	#DIV/0!	#DIV/0!	#DIV/0!	#DIV/0!	#DIV/0!	#DIV/0!	#DIV/0!	#DIV/0!	#DIV/0!	#DIV/0!	#DIV/0!	#DIV/0!	#DIV/0!	#DIV/0!	#DIV/0!	#DIV/0!	#DIV/0!	#DIV/0!
Na	0.250426	0.283695	0.284167	0.269933	0.288657	0.293801	0.285386	0.294974	0.277951	0.0811788	0.0701039	0.0557119	0.0597842	0.0064889	0.0777813	0.0811586	0.398582	-0.243794	0.141585	0.0618682	0.0813386	-4.44089e-16	#DIV/0!	#DIV/0!	#DIV/0!	#DIV/0!	#DIV/0!	#DIV/0!	#DIV/0!	#DIV/0!	#DIV/0!	#DIV/0!	#DIV/0!	#DIV/0!	#DIV/0!	#DIV/0!	#DIV/0!	#DIV/0!	#DIV/0!	#DIV/0!	#DIV/0!	#DIV/0!	#DIV/0!	#DIV/0!	#DIV/0!	#DIV/0!	#DIV/0!	#DIV/0!	#DIV/0!
Bsite	2	2	2	2	2	2	2	2	2	2	2	2	2	2	2	2	0.407866	2	2	2	2	2	#DIV/0!	#DIV/0!	#DIV/0!	#DIV/0!	#DIV/0!	#DIV/0!	#DIV/0!	#DIV/0!	#DIV/0!	#DIV/0!	#DIV/0!	#DIV/0!	#DIV/0!	#DIV/0!	#DIV/0!	#DIV/0!	#DIV/0!	#DIV/0!	#DIV/0!	#DIV/0!	#DIV/0!	#DIV/0!	#DIV/0!	#DIV/0!	#DIV/0!	#DIV/0!	#DIV/0!
Na	0.319869	0.238229	0.278486	0.383403	0.313986	0.326722	0.45823	0.411763	0.282581	0.666176	0.706926	0.700073	0.732938	0.66217	0.613999	0.59427	0	1.58944	0.537629	0.62786	0.664927	0.0185971	#DIV/0!	#DIV/0!	#DIV/0!	#DIV/0!	#DIV/0!	#DIV/0!	#DIV/0!	#DIV/0!	#DIV/0!	#DIV/0!	#DIV/0!	#DIV/0!	#DIV/0!	#DIV/0!	#DIV/0!	#DIV/0!	#DIV/0!	#DIV/0!	#DIV/0!	#DIV/0!	#DIV/0!	#DIV/0!	#DIV/0!	#DIV/0!	#DIV/0!	#DIV/0!	#DIV/0!
K	0.11423	0.102965	0.109286	0.106559	0.100628	0.107806	0.175552	0.16908	0.0954443	0.264788	0.239719	0.231695	0.244678	0.310554	0.309577	0.293073	1.42309	0.000447406	0.289753	0.297449	0.264999	0.0520575	#DIV/0!	#DIV/0!	#DIV/0!	#DIV/0!	#DIV/0!	#DIV/0!	#DIV/0!	#DIV/0!	#DIV/0!	#DIV/0!	#DIV/0!	#DIV/0!	#DIV/0!	#DIV/0!	#DIV/0!	#DIV/0!	#DIV/0!	#DIV/0!	#DIV/0!	#DIV/0!	#DIV/0!	#DIV/0!	#DIV/0!	#DIV/0!	#DIV/0!	#DIV/0!	#DIV/0!
Asite	0.434098	0.341194	0.387772	0.489963	0.414614	0.434528	0.633782	0.580843	0.378025	0.930963	0.946645	0.931768	0.977616	0.972724	0.923576	0.887343	1.42309	1.58989	0.827383	0.925309	0.929926	0.0706546	#DIV/0!	#DIV/0!	#DIV/0!	#DIV/0!	#DIV/0!	#DIV/0!	#DIV/0!	#DIV/0!	#DIV/0!	#DIV/0!	#DIV/0!	#DIV/0!	#DIV/0!	#DIV/0!	#DIV/0!	#DIV/0!	#DIV/0!	#DIV/0!	#DIV/0!	#DIV/0!	#DIV/0!	#DIV/0!	#DIV/0!	#DIV/0!	#DIV/0!	#DIV/0!	#DIV/0!
Si	6.56253	6.52198	6.41388	6.22776	6.30296	6.2228	6.18277	6.20773	6.50726	6.04583	5.96015	5.93281	5.98871	5.83286	5.96541	5.90564	4.92783	6.84347	5.89529	5.93198	6.04559	6.08739	#DIV/0!	#DIV/0!	#DIV/0!	#DIV/0!	#DIV/0!	#DIV/0!	#DIV/0!	#DIV/0!	#DIV/0!	#DIV/0!	#DIV/0!	#DIV/0!	#DIV/0!	#DIV/0!	#DIV/0!	#DIV/0!	#DIV/0!	#DIV/0!	#DIV/0!	#DIV/0!	#DIV/0!	#DIV/0!	#DIV/0!	#DIV/0!	#DIV/0!	#DIV/0!	#DIV/0!
Mg/Mg+Fe2+	0.766035	0.822665	0.803484	0.841021	0.86115	0.871368	0.78179	0.79628	0.851928	0.708333	0.787328	0.746514	0.724295	0.717466	0.749568	0.744488	0.698954	0	0.772553	0.742598	0.708765	1.01879	#DIV/0!	#DIV/0!	#DIV/0!	#DIV/0!	#DIV/0!	#DIV/0!	#DIV/0!	#DIV/0!	#DIV/0!	#DIV/0!	#DIV/0!	#DIV/0!	#DIV/0!	#DIV/0!	#DIV/0!	#DIV/0!	#DIV/0!	#DIV/0!	#DIV/0!	#DIV/0!	#DIV/0!	#DIV/0!	#DIV/0!	#DIV/0!	#DIV/0!	#DIV/0!	#DIV/0!
CaB	1.74957	1.71631	1.71583	1.73007	1.71134	1.7062	1.71461	1.70503	1.72205	1.91882	1.9299	1.94429	1.94022	1.99351	1.92222	1.91884	0.00928349	2.24379	1.85841	1.93813	1.91866	0.160946	#DIV/0!	#DIV/0!	#DIV/0!	#DIV/0!	#DIV/0!	#DIV/0!	#DIV/0!	#DIV/0!	#DIV/0!	#DIV/0!	#DIV/0!	#DIV/0!	#DIV/0!	#DIV/0!	#DIV/0!	#DIV/0!	#DIV/0!	#DIV/0!	#DIV/0!	#DIV/0!	#DIV/0!	#DIV/0!	#DIV/0!	#DIV/0!	#DIV/0!	#DIV/0!	#DIV/0!
(Na+K)A	0.434098	0.341194	0.387772	0.489963	0.414614	0.434528	0.633782	0.580843	0.378025	0.930963	0.946645	0.931768	0.977616	0.972724	0.923576	0.887343	1.42309	1.58989	0.827383	0.925309	0.929926	0.0706546	#DIV/0!	#DIV/0!	#DIV/0!	#DIV/0!	#DIV/0!	#DIV/0!	#DIV/0!	#DIV/0!	#DIV/0!	#DIV/0!	#DIV/0!	#DIV/0!	#DIV/0!	#DIV/0!	#DIV/0!	#DIV/0!	#DIV/0!	#DIV/0!	#DIV/0!	#DIV/0!	#DIV/0!	#DIV/0!	#DIV/0!	#DIV/0!	#DIV/0!	#DIV/0!	#DIV/0!
(Ca+Na)B	2	2	2	2	2	2	2	2	2	2	2	2	2	2	2	2	0.407866	2	2	2	2	0.160946	#DIV/0!	#DIV/0!	#DIV/0!	#DIV/0!	#DIV/0!	#DIV/0!	#DIV/0!	#DIV/0!	#DIV/0!	#DIV/0!	#DIV/0!	#DIV/0!	#DIV/0!	#DIV/0!	#DIV/0!	#DIV/0!	#DIV/0!	#DIV/0!	#DIV/0!	#DIV/0!	#DIV/0!	#DIV/0!	#DIV/0!	#DIV/0!	#DIV/0!	#DIV/0!	#DIV/0!
NaB	0.250426	0.283695	0.284167	0.269933	0.288657	0.293801	0.285386	0.294974	0.277951	0.0811788	0.0701039	0.0557119	0.0597842	0.0064889	0.0777813	0.0811586	0.398582	-0.243794	0.141585	0.0618682	0.0813386	-4.44089e-16	#DIV/0!	#DIV/0!	#DIV/0!	#DIV/0!	#DIV/0!	#DIV/0!	#DIV/0!	#DIV/0!	#DIV/0!	#DIV/0!	#DIV/0!	#DIV/0!	#DIV/0!	#DIV/0!	#DIV/0!	#DIV/0!	#DIV/0!	#DIV/0!	#DIV/0!	#DIV/0!	#DIV/0!	#DIV/0!	#DIV/0!	#DIV/0!	#DIV/0!	#DIV/0!	#DIV/0!
Ti	0.274433	0.246581	0.265814	0.241214	0.214577	0.227734	0.428003	0.421124	0.203968	0.251965	0.203129	0.215414	0.23703	0.317951	0.296219	0.289339	0.371302	0	0.28511	0.297951	0.251986	0	#DIV/0!	#DIV/0!	#DIV/0!	#DIV/0!	#DIV/0!	#DIV/0!	#DIV/0!	#DIV/0!	#DIV/0!	#DIV/0!	#DIV/0!	#DIV/0!	#DIV/0!	#DIV/0!	#DIV/0!	#DIV/0!	#DIV/0!	#DIV/0!	#DIV/0!	#DIV/0!	#DIV/0!	#DIV/0!	#DIV/0!	#DIV/0!	#DIV/0!	#DIV/0!	#DIV/0!
Si*	7.68745	7.7042	7.54426	7.25714	7.38257	7.28229	7.17938	7.22294	7.59239	6.8846	6.74094	6.70973	6.77277	6.49912	6.67945	6.63073	0	4.32666	6.6624	6.63955	6.88485	0	#DIV/0!	#DIV/0!	#DIV/0!	#DIV/0!	#DIV/0!	#DIV/0!	#DIV/0!	#DIV/0!	#DIV/0!	#DIV/0!	#DIV/0!	#DIV/0!	#DIV/0!	#DIV/0!	#DIV/0!	#DIV/0!	#DIV/0!	#DIV/0!	#DIV/0!	#DIV/0!	#DIV/0!	#DIV/0!	#DIV/0!	#DIV/0!	#DIV/0!	#DIV/0!	#DIV/0!
AlT	1.54275	1.54177	1.72176	1.96332	1.878	1.96177	1.8006	1.77409	1.67842	2.15964	2.24228	2.33364	2.24114	2.49204	2.34081	2.43798	2.87663	6.14744	2.44415	2.38108	2.1593	2.30212	#DIV/0!	#DIV/0!	#DIV/0!	#DIV/0!	#DIV/0!	#DIV/0!	#DIV/0!	#DIV/0!	#DIV/0!	#DIV/0!	#DIV/0!	#DIV/0!	#DIV/0!	#DIV/0!	#DIV/0!	#DIV/0!	#DIV/0!	#DIV/0!	#DIV/0!	#DIV/0!	#DIV/0!	#DIV/0!	#DIV/0!	#DIV/0!	#DIV/0!	#DIV/0!	#DIV/0!
Mg*	3.0278	3.19982	3.04172	3.04368	3.16852	3.13149	2.79108	2.85265	3.28542	2.70203	2.98032	2.79413	2.74161	2.56124	2.7351	2.6704	3.45984	-1.14913	2.72052	2.68989	2.70342	5.17495	#DIV/0!	#DIV/0!	#DIV/0!	#DIV/0!	#DIV/0!	#DIV/0!	#DIV/0!	#DIV/0!	#DIV/0!	#DIV/0!	#DIV/0!	#DIV/0!	#DIV/0!	#DIV/0!	#DIV/0!	#DIV/0!	#DIV/0!	#DIV/0!	#DIV/0!	#DIV/0!	#DIV/0!	#DIV/0!	#DIV/0!	#DIV/0!	#DIV/0!	#DIV/0!	#DIV/0!
[6]Al*	-1.47973	-1.45609	-1.34992	-1.25036	-1.25659	-1.24425	-1.73713	-1.7138	-1.33653	-1.59095	-1.56774	-1.40443	-1.53074	-1.44922	-1.5716	-1.42182	-5.83087	5.66863	-1.41323	-1.50438	-1.59147	-2.34133	#DIV/0!	#DIV/0!	#DIV/0!	#DIV/0!	#DIV/0!	#DIV/0!	#DIV/0!	#DIV/0!	#DIV/0!	#DIV/0!	#DIV/0!	#DIV/0!	#DIV/0!	#DIV/0!	#DIV/0!	#DIV/0!	#DIV/0!	#DIV/0!	#DIV/0!	#DIV/0!	#DIV/0!	#DIV/0!	#DIV/0!	#DIV/0!	#DIV/0!	#DIV/0!	#DIV/0!
Mn*	0.124341	0.154486	0.107476	-0.00481014	0.00804642	0.0233813	0.286737	0.297385	0.00725185	0.100906	-0.0398084	-0.0690003	-0.0227131	0.174465	0.203273	0.157109	2.96676	-3.47525	0.19628	0.168681	0.102673	-0.0696453	#DIV/0!	#DIV/0!	#DIV/0!	#DIV/0!	#DIV/0!	#DIV/0!	#DIV/0!	#DIV/0!	#DIV/0!	#DIV/0!	#DIV/0!	#DIV/0!	#DIV/0!	#DIV/0!	#DIV/0!	#DIV/0!	#DIV/0!	#DIV/0!	#DIV/0!	#DIV/0!	#DIV/0!	#DIV/0!	#DIV/0!	#DIV/0!	#DIV/0!	#DIV/0!	#DIV/0!
[truncated: 206 more columns]

## Sheet: Diagrams
	Input the results (in "Amp calc") into the diagram templates

## Sheet: Data and weights
	Stability curve data																	Molar weights
		Upper limit																	PM	O	X ox	X ox
	T	1000	950	900	850	800	750	650	550									SiO2	60.084	15.999	0.532554	0.532554
	P	1109.79	690.17	474.34	326.01	224.06	154	72.74	34.36									TiO2	79.898	15.999	0.400486	0.400486
																		Al2O3	101.961	15.999	0.470739	0.470739
		Thermal stability																Cr2O3	151.99	15.999	0.31579	0.31579
	T	1080	1060	1050	1030	1010	990	970	950	900	850	800	750	650	550			FeO	71.846	15.999	0.222685	0.222685
	P	1164.01	845.35	726.85	546.41	419.44	328.28	261.59	211.55	133.66	91.3	66.62	51.35	34.65	34.36			MnO	70.937	15.999	0.225538	0.225538
																		MgO	40.304	15.999	0.396958	0.396958
		35% limit																CaO	56.079	15.999	0.285294	0.285294
	T	990	970	950	900	850	800	750										Na2O	61.979	15.999	0.258136	0.258136
	P	684.63	545.55	442.02	278.75	190.41	138.94	107.08										K2O	94.195	15.999	0.16985	0.16985
																		F	18.998	15.999	0.421071	0.421071
		SiO2 52																Cl	35.453	15.999	0.225637	0.225637
	T	1060	1035	1060														H2O	18	15.999	0.888833	0.0555556
	P	400	500	1120														Fe2O3	159.691	15.999	0.300562	0.300562
																			PA
		SiO2 63																Si	28.086
	T	1020	965	945	927													Ti	47.9
	P	120	205	300	620													Al	26.982
																		Cr	51.996
		SiO2 70																Fe	55.847
	T	960	875	840														Mg	24.305
	P	70	200	350														Ca	40.08
																		Mn	54.938
		SiO2 76																Na	22.99
	T	855	800	776														K	39.098
	P	50	138.94	224
			T	635	705	750	850	950	1050
		NNO	logfO2	-17.9522	-16.026	-14.9282	-12.8067	-11.0359	-9.53592
		NNO+2	logfO2	-15.9522	-14.026	-12.9282	-10.8067	-9.03591	-7.53592
		900
		-13
		T	1100	910	915	800
		P	800	90	800	350
	H2O	2.68981	2.65036	2.66641	2.74476	2.89925	3.0972	3.41134	4.00226	4.71707	5.58175	6.62771
	T	550	600	650	700	750	800	850	900	950	1000	1050
	H2O	3.1443	8.8779
	T	550	950
	H2O	6.5	10	4
	T	700	1100	1050

## Sheet: OPNA5
Point	18	19	20	21
Sample number	OPNA5	OPNA5	OPNA5	OPNA5
Comments	Zoned Hbl	Zoned Hbl	Zoned Hbl	Zoned Hbl
SiO2	40.78	40.6	40.18	40.28
TiO2	2.26	1.84	1.94	2.12
Al2O3	12.36	12.96	13.41	12.79
Cr2O3	0	0	0.01	0.01
FeO	12.86	11.49	12.21	12.25
MnO	0.28	0.12	0.16	0.22
MgO	13.18	14.48	13.58	13.45
CaO	12.08	12.27	12.29	12.18
Na2O	2.6	2.73	2.64	2.75
K2O	1.4	1.28	1.23	1.29

## Sheet: OPN8B
Sample_ID	OP_N8B	OP_N8B	OP_N8B	OP_N8B	OP_N8B	OP_N8B	OP_N8B	OP_N8B
Point	Point7	Point8	9	10	11	12	13	14
Job	Job8	8	8	8	8	8	8	8
SiO2	38.697	40.193	39.923	35.261	0.366	39.027	40.102	40.02
TiO2	2.805	2.654	2.601	3.533	4.798	0	2.579	2.673
Al2O3	14.028	13.382	13.984	17.465	8.37	29.746	14.107	13.63
Cr2O3	0	0.02	0.004	0.065	0.021	0	0	0
FeO	11.067	10.556	11.169	12.349	75.491	0.062	11.242	10.824
MnO	0.229	0.197	0.189	0.193	0.665	0	0.23	0.233
MgO	13.052	13.831	13.428	16.084	2.8	0	13.528	13.658
CaO	12.344	12.088	12.107	0.062	0.049	11.943	11.799	12.204
Na2O	2.288	2.404	2.355	1.471	0.011	3.958	2.383	2.4
K2O	1.615	1.635	1.553	7.982	0.333	0.002	1.545	1.573
NiO	0	0.011	0.026	0.02	0	0.005	0	0
Total	96.125	96.971	97.339	94.485	92.904	84.743	97.515	97.215

## Sheet: Bt & altrd amph inclusions
			Sample	OPNA5	OP_N8B	F12	F12	F12
			Point	16	10	1	5	7
			Job	7	8	3	3	3
			SiO2	37.44	35.26	38.57	38.44	40.65
			TiO2	0	3.53	2.89	2.07	2.38
			Al2O3	12.02	17.47	11.41	11.26	11.46
			Cr2O3	0	0.07	0.03	0.05	0.07
			FeO	10.01	12.35	12.86	13.49	12.72
			MnO	0.76	0.19	0.15	0.18	0.21
			MgO	20.57	16.08	18.03	18.02	18.98
			CaO	0.92	0.06	0	0.02	0.01
			Na2O	0.06	1.47	0.82	1.14	0.71
			K2O	0.25	7.98	9.48	8.67	8.67
			NiO	0	0.02	0.02	0	0
			Total	82.03	94.49	94.25	93.34	95.86
			Mineral	Chlorite-smectite altered Amphibole	Mg-Biotite	Mg-Biotite	Mg-Biotite	Mg-Biotite
			Mode of occurrence	Inclusion in plagioclase phenocryst	Inclusion in hornblend phenocryst	microphenocryst	microphenocryst	microphenocryst

## Sheet: F12
Point	1	2	3	4	5	6	7	8	9	10	11	12	13	14	15
	BIO	KFSP	ALB	?	BIO	?	BIO	AP	AP	QTZ	?	?	QTZ +	?	?
Sample	F12	F12	F12	F12	F12	F12	F12	F12	F12	F12	F12	F12	F12	F12	F12
SiO2	38.568	63.44	67.536	30.374	38.438	4.229	40.653	0	0	98.587	89.16	0.14	88.03	16.383	54.744
TiO2	2.889	0.012	0.007	0.25	2.072	0.04	2.376	0	0	0.018	0	0	0.036	0	0
Al2O3	11.405	17.916	19.176	8.977	11.262	1.343	11.459	0	0	0	0.213	0.015	3.687	1.59	2.207
Cr2O3	0.029	0.026	0	0	0.05	0	0.073	0.004	0.045	0	0.018	0.026	0.014	0.03	0.029
FeO	12.863	0	0.067	2.47	13.489	53.814	12.717	0.115	0.097	0.048	0.11	59.783	0.692	20.304	4.527
MnO	0.151	0.012	0	0.023	0.182	0	0.212	0.082	0.087	0	0.006	0	0	0	0
MgO	18.027	0	0	1.472	18.019	0	18.978	0.046	0.042	0.001	0	0	0.543	0	0
CaO	0	0	0.022	0.03	0.023	0	0.007	52.67	52.921	0.019	0	0.076	0.04	0	0.002
Na2O	0.819	0.505	12.459	3.148	1.136	0.25	0.712	0.262	0.095	0.034	0.183	0	0.32	0.306	0.542
K2O	9.476	17.263	0.163	8.037	8.667	1.081	8.671	0	0	0	0.33	0.012	0.671	0.212	0.478
NiO	0.022	0	0	0.02	0.002	0.034	0.001	0.042	0	0.035	0	0.035	0.017	0.041	0.018
Total	94.249	99.174	99.43	54.801	93.34	60.791	95.859	53.221	53.287	98.742	90.02	60.087	94.05	38.866	62.547
