# Supplementary material for: The Petrology & Geochemistry of REE-Enriched, Alkaline Vol-Canic Rocks of Ambitle Island, Feni Island Group, Papua New Guinea
Source: Preprints.org preprint supplement (doi:10.20944/preprints202306.0971.v1), 2023-06-14
Supplement: Supplementary file 15 [file emc02.xlsx]

## Sheet: emc02
Generated from emc02.TXT by VB Plum system Version 1.09 on 12/08/2010 at 09:42:29								15 kV	30 nA	10 μm
	sample OPN7
	1	2	3	4	5	6	7	8	9	10	11	12	13	14	15	16	17	18	19	20	21	22	23	24	25	26	27	28	29	30	31	32	33	34	35	36	37	38	39	40	41	42	43	44	45	46	47	48	49
	++++	++++	++++	++++	++++	++++	++++	++++	++++	++++	++++	++++	++++	++++	++++	++++	++++	++++	++++	++++	++++	++++	++++	++++	++++	++++	++++	++++	++++	++++	++++	++++	++++	++++	++++	++++	++++	++++	++++	++++	++++	++++	++++	++++	++++	++++	++++	++++	++++
SiO2	5.399	52.45	50.967	46.974	1.252	51.718	49.412	52.518	53.134	0	0	40.005	41.857	39.88	0	40.817	40.919	39.606	49.246	49.563	49.408	49.775	40.967	51.977	39.712	41.243	50.306	50.898	51.424	51.725	0	54.056	40.755	40.564	40.731	40.793	54.554	56.85	40.908	39.791	40.962	41.095	40.788	40.195	53.108	50.613	56.569	40.686	40.874
TiO2	3.862	0.221	0.461	0.936	2.061	0.459	0.605	0.312	0.208	0.343	0.289	0	0	0	3.431	0	0	0	0.767	0.662	0.6	0.506	0	0.321	0	0	0.476	0.317	0.346	0.308	0.224	0.106	0	0.025	0	0	0.033	0.056	0	0	0.029	0	0	0	0.293	0.488	0.061	0	0.031
Al2O3	4.395	1.795	2.872	6.097	7.384	1.903	3.682	2.03	1.327	8.209	9.246	0	0	0.002	5.062	0	0.014	0	3.311	3.438	4.169	3.742	0	2.272	0.014	0.014	3.267	2.7	2.308	1.837	8.473	27.506	0	0.016	0.02	0.034	26.506	24.688	0	0.027	0	0	0	0.324	1.388	3.031	25.234	0.023	0.037
Cr2O3	0	0.049	0.155	0	16.891	0	0.008	0.596	0.163	56.537	56.068	0.102	0.061	0	0.012	0.066	0.072	0.026	0.002	0	0	0	0.078	0.461	0.033	0.019	0.033	0.006	0	0.037	55.306	0	0.037	0.015	0.056	0.051	0	0	0	0.024	0.041	0.028	0.081	0.052	0.425	0	0	0.051	0.051
FeO	74.765	4.378	4.759	8.399	55.816	8.212	8.889	3.667	4.023	22.716	21.596	6.899	7	10.781	64.867	7.042	6.76	10.743	10.097	10.036	7.061	6.198	6.522	3.819	11.647	6.424	8.07	8.355	5.453	5.061	22.382	0.899	8.891	8.449	9.427	8.992	1.109	1.054	7.096	10.849	7.121	7.792	7.638	11.382	3.883	6.477	0.962	8.109	6.843
MnO	0.728	0.137	0.109	0.153	0.795	0.567	0.402	0.044	0.116	0.78	0.728	0.058	0.104	0.552	0.551	0.085	0.118	0.469	0.576	0.585	0.097	0.168	0.085	0.046	0.488	0.127	0.294	0.254	0.127	0.098	0.95	0.02	0.109	0.093	0.35	0.331	0.003	0	0.132	0.452	0.096	0.197	0.125	0.469	0.111	0.131	0.006	0.063	0.082
MgO	5.88	16.61	15.973	13.051	7.153	12.765	11.911	16.899	17.034	10.046	10.918	50.186	50.424	45.581	6.625	51.534	51.314	47.518	11.477	11.347	14.287	14.829	51.825	16.602	46.763	51.646	12.912	12.77	15.594	16.039	9.793	0.018	50.308	50.699	49.28	49.731	0.027	0.056	51.754	47.903	51.227	50.809	50.966	46.581	17.473	15.223	0.067	50.261	51.695
CaO	1.456	23.69	23.546	22.695	0.951	23.197	23.021	23.44	23.345	0.066	0.026	0.096	0.07	0.301	0.003	0.082	0.094	0.235	22.818	22.651	23.041	23.176	0.091	23.557	0.316	0.071	23.205	22.9	23.448	23.549	0	10.063	0.057	0.057	0.289	0.247	9.083	6.872	0.194	0.31	0.061	0.221	0.072	0.384	22.93	22.899	7.247	0.055	0.09
Na2O	0.041	0.261	0.428	0.614	0.086	0.806	0.841	0.287	0.232	0.027	0	0.002	0	0.006	0	0	0	0	1.117	1.048	0.479	0.413	0	0.285	0	0.031	0.915	0.983	0.378	0.36	0	5.269	0.003	0	0	0	5.814	6.469	0	0.008	0.015	0	0	0.059	0.222	0.432	6.893	0.029	0.038
K2O	0.078	0.001	0.014	0.048	0.058	0	0	0.022	0.004	0.014	0.01	0.001	0	0	0	0	0.021	0.014	0	0	0.026	0	0	0	0	0.004	0	0.011	0.006	0	0	0.458	0	0	0.022	0	0.787	2.278	0	0.01	0	0	0.013	0.004	0.011	0.016	1.224	0.032	0.008
NiO	0.024	0.022	0.047	0.023	0.089	0	0	0.022	0.027	0.056	0.074	0.29	0.273	0.099	0.061	0.416	0.371	0.11	0.005	0.003	0.027	0.001	0.367	0.032	0.079	0.416	0.048	0.004	0.01	0.002	0.055	0.021	0.325	0.334	0.149	0.203	0.007	0	0.26	0.107	0.362	0.244	0.381	0.099	0	0	0.008	0.36	0.337
Total	96.628	99.614	99.331	98.99	92.536	99.627	98.771	99.837	99.613	98.794	98.955	97.639	99.789	97.202	80.612	100.042	99.683	98.721	99.416	99.333	99.195	98.808	99.935	99.372	99.052	99.995	99.526	99.198	99.094	99.016	97.183	98.416	100.485	100.252	100.324	100.382	97.923	98.323	100.344	99.481	99.914	100.386	100.064	99.549	99.844	99.31	98.271	99.669	100.086
O	10	10	10	10	10	10	10	10	10	10	10	10	10	10	10	10	10	10	10	10	10	10	10	10	10	10	10	10	10	10	10	10	10	10	10	10	10	10	10	10	10	10	10	10	10	10	10	10	10
Si	0.5512	3.2246	3.1566	2.9786	0.1279	3.2424	3.1419	3.2117	3.255	0	0	2.4832	2.5339	2.5304	0	2.475	2.4858	2.4783	3.1351	3.151	3.0964	3.1189	2.4798	3.1981	2.4858	2.4928	3.1603	3.2053	3.1967	3.2125	0	3.1085	2.479	2.4695	2.4889	2.4863	3.1558	3.2769	2.4728	2.4722	2.4857	2.4894	2.479	2.4977	3.2423	3.1534	3.2513	2.4865	2.4745
Ti	0.2965	0.0102	0.0215	0.0446	0.1583	0.0216	0.0289	0.0143	0.0096	0.0221	0.0184	0	0	0	0.3276	0	0	0	0.0367	0.0317	0.0283	0.0238	0	0.0149	0	0	0.0225	0.015	0.0162	0.0144	0.0146	0.0046	0	0.0011	0	0	0.0014	0.0024	0	0	0.0013	0	0	0	0.0135	0.0229	0.0026	0	0.0014
Al	0.5288	0.1301	0.2097	0.4557	0.8888	0.1406	0.276	0.1463	0.0958	0.8279	0.921	0	0	0.0001	0.7575	0	0.001	0	0.2485	0.2576	0.308	0.2764	0	0.1648	0.001	0.001	0.2419	0.2004	0.1691	0.1345	0.8679	1.8644	0	0.0011	0.0014	0.0024	1.8073	1.6773	0	0.002	0	0	0	0.0237	0.0999	0.2226	1.7095	0.0017	0.0026
Cr	0	0.0024	0.0076	0	1.3639	0	0.0004	0.0288	0.0079	3.825	3.7465	0.005	0.0029	0	0.0012	0.0032	0.0035	0.0013	0.0001	0	0	0	0.0037	0.0224	0.0016	0.0009	0.0016	0.0003	0	0.0018	3.7999	0	0.0018	0.0007	0.0027	0.0025	0	0	0	0.0012	0.002	0.0013	0.0039	0.0026	0.0205	0	0	0.0025	0.0024
Fe2	6.3832	0.2251	0.2465	0.4454	4.7672	0.4306	0.4727	0.1875	0.2061	1.6256	1.5264	0.3581	0.3544	0.5721	6.8872	0.3571	0.3435	0.5622	0.5376	0.5336	0.3701	0.3248	0.3302	0.1965	0.6097	0.3247	0.424	0.44	0.2835	0.2629	1.6266	0.0432	0.4523	0.4302	0.4818	0.4584	0.0537	0.0508	0.3587	0.5637	0.3614	0.3948	0.3882	0.5915	0.1983	0.3375	0.0462	0.4145	0.3465
Mn	0.063	0.0071	0.0057	0.0082	0.0688	0.0301	0.0217	0.0023	0.006	0.0565	0.0521	0.003	0.0053	0.0297	0.0593	0.0044	0.0061	0.0249	0.0311	0.0315	0.0051	0.0089	0.0044	0.0024	0.0259	0.0065	0.0156	0.0135	0.0067	0.0052	0.0699	0.001	0.0056	0.0048	0.0181	0.0171	0.0001	0	0.0068	0.0238	0.0049	0.0101	0.0064	0.0247	0.0057	0.0069	0.0003	0.0033	0.0042
Mg	0.8948	1.5222	1.4747	1.2336	1.089	1.193	1.129	1.5405	1.5555	1.2814	1.3755	4.6438	4.5503	4.3113	1.2538	4.6582	4.647	4.4325	1.0892	1.0754	1.3347	1.3851	4.6764	1.5227	4.3636	4.6534	1.2092	1.1988	1.445	1.4849	1.2686	0.0015	4.5616	4.601	4.489	4.5185	0.0023	0.0048	4.6636	4.4366	4.6341	4.5881	4.6176	4.3148	1.5902	1.4138	0.0057	4.5789	4.6652
Ca	0.1593	1.5606	1.5626	1.542	0.1041	1.5583	1.5685	1.5359	1.5324	0.0061	0.0024	0.0064	0.0045	0.0205	0.0004	0.0053	0.0061	0.0158	1.5565	1.543	1.5472	1.556	0.0059	1.5531	0.0212	0.0046	1.562	1.5452	1.5618	1.5671	0	0.62	0.0037	0.0037	0.0189	0.0161	0.563	0.4244	0.0126	0.0206	0.004	0.0143	0.0047	0.0256	1.5	1.5287	0.4463	0.0036	0.0058
Na	0.0081	0.0311	0.0514	0.0755	0.017	0.098	0.1037	0.034	0.0276	0.0045	0	0.0002	0	0.0007	0	0	0	0	0.1379	0.1292	0.0582	0.0502	0	0.034	0	0.0036	0.1115	0.12	0.0456	0.0434	0	0.5875	0.0004	0	0	0	0.6521	0.723	0	0.001	0.0018	0	0	0.0071	0.0263	0.0522	0.7682	0.0034	0.0045
K	0.0102	0.0001	0.0011	0.0039	0.0076	0	0	0.0017	0.0003	0.0015	0.0011	0.0001	0	0	0	0	0.0016	0.0011	0	0	0.0021	0	0	0	0	0.0003	0	0.0009	0.0005	0	0	0.0336	0	0	0.0017	0	0.0581	0.1675	0	0.0008	0	0	0.001	0.0003	0.0009	0.0013	0.0898	0.0025	0.0006
Ni	0.002	0.0011	0.0023	0.0012	0.0073	0	0	0.0011	0.0013	0.0039	0.005	0.0145	0.0133	0.0051	0.0062	0.0203	0.0181	0.0055	0.0003	0.0002	0.0014	0.0001	0.0179	0.0016	0.004	0.0202	0.0024	0.0002	0.0005	0.0001	0.0038	0.001	0.0159	0.0164	0.0073	0.01	0.0003	0	0.0126	0.0053	0.0177	0.0119	0.0186	0.0049	0	0	0.0004	0.0177	0.0164
Total	8.897	6.7146	6.7396	6.7886	8.5998	6.7146	6.7428	6.7043	6.6975	7.6545	7.6484	7.5144	7.4647	7.4699	9.2931	7.5234	7.5127	7.5216	6.7728	6.7531	6.7515	6.7442	7.5183	6.7105	7.5128	7.5082	6.7511	6.7398	6.7256	6.7267	7.6515	6.2653	7.5203	7.5285	7.5099	7.5112	6.2942	6.3273	7.5272	7.5271	7.5128	7.5099	7.5195	7.4929	6.6976	6.7392	6.3203	7.5144	7.5241
O	10	6	6	6	10	6	6	6	6	0	0	4	4	4	0	4	4	4	6	6	6	6	4	6	4	4	6	6	6	6	10	6	4	4	4	4	6	6	4	4	4	4	4	4	6	6	6	4	4
Si	0.5512	1.93476	1.89396	1.78716	0.1279	1.94544	1.88514	1.92702	1.953	0	0	0.99328	1.01356	1.01216	0	0.99	0.99432	0.99132	1.88106	1.8906	1.85784	1.87134	0.99192	1.91886	0.99432	0.99712	1.89618	1.92318	1.91802	1.9275	0	1.8651	0.9916	0.9878	0.99556	0.99452	1.89348	1.96614	0.98912	0.98888	0.99428	0.99576	0.9916	0.99908	1.94538	1.89204	1.95078	0.9946	0.9898
Ti	0.2965	0.00612	0.0129	0.02676	0.1583	0.01296	0.01734	0.00858	0.00576	0	0	0	0	0	0	0	0	0	0.02202	0.01902	0.01698	0.01428	0	0.00894	0	0	0.0135	0.009	0.00972	0.00864	0.0146	0.00276	0	0.00044	0	0	0.00084	0.00144	0	0	0.00052	0	0	0	0.0081	0.01374	0.00156	0	0.00056
Al	0.5288	0.07806	0.12582	0.27342	0.8888	0.08436	0.1656	0.08778	0.05748	0	0	0	0	4e-05	0	0	0.0004	0	0.1491	0.15456	0.1848	0.16584	0	0.09888	0.0004	0.0004	0.14514	0.12024	0.10146	0.0807	0.8679	1.11864	0	0.00044	0.00056	0.00096	1.08438	1.00638	0	0.0008	0	0	0	0.00948	0.05994	0.13356	1.0257	0.00068	0.00104
Cr	0	0.00144	0.00456	0	1.3639	0	0.00024	0.01728	0.00474	0	0	0.002	0.00116	0	0	0.00128	0.0014	0.00052	6e-05	0	0	0	0.00148	0.01344	0.00064	0.00036	0.00096	0.00018	0	0.00108	3.7999	0	0.00072	0.00028	0.00108	0.001	0	0	0	0.00048	0.0008	0.00052	0.00156	0.00104	0.0123	0	0	0.001	0.00096
Fe2	6.3832	0.13506	0.1479	0.26724	4.7672	0.25836	0.28362	0.1125	0.12366	0	0	0.14324	0.14176	0.22884	0	0.14284	0.1374	0.22488	0.32256	0.32016	0.22206	0.19488	0.13208	0.1179	0.24388	0.12988	0.2544	0.264	0.1701	0.15774	1.6266	0.02592	0.18092	0.17208	0.19272	0.18336	0.03222	0.03048	0.14348	0.22548	0.14456	0.15792	0.15528	0.2366	0.11898	0.2025	0.02772	0.1658	0.1386
Mn	0.063	0.00426	0.00342	0.00492	0.0688	0.01806	0.01302	0.00138	0.0036	0	0	0.0012	0.00212	0.01188	0	0.00176	0.00244	0.00996	0.01866	0.0189	0.00306	0.00534	0.00176	0.00144	0.01036	0.0026	0.00936	0.0081	0.00402	0.00312	0.0699	0.0006	0.00224	0.00192	0.00724	0.00684	6e-05	0	0.00272	0.00952	0.00196	0.00404	0.00256	0.00988	0.00342	0.00414	0.00018	0.00132	0.00168
Mg	0.8948	0.91332	0.88482	0.74016	1.089	0.7158	0.6774	0.9243	0.9333	0	0	1.85752	1.82012	1.72452	0	1.86328	1.8588	1.773	0.65352	0.64524	0.80082	0.83106	1.87056	0.91362	1.74544	1.86136	0.72552	0.71928	0.867	0.89094	1.2686	0.0009	1.82464	1.8404	1.7956	1.8074	0.00138	0.00288	1.86544	1.77464	1.85364	1.83524	1.84704	1.72592	0.95412	0.84828	0.00342	1.83156	1.86608
Ca	0.1593	0.93636	0.93756	0.9252	0.1041	0.93498	0.9411	0.92154	0.91944	0	0	0.00256	0.0018	0.0082	0	0.00212	0.00244	0.00632	0.9339	0.9258	0.92832	0.9336	0.00236	0.93186	0.00848	0.00184	0.9372	0.92712	0.93708	0.94026	0	0.372	0.00148	0.00148	0.00756	0.00644	0.3378	0.25464	0.00504	0.00824	0.0016	0.00572	0.00188	0.01024	0.9	0.91722	0.26778	0.00144	0.00232
Na	0.0081	0.01866	0.03084	0.0453	0.017	0.0588	0.06222	0.0204	0.01656	0	0	8e-05	0	0.00028	0	0	0	0	0.08274	0.07752	0.03492	0.03012	0	0.0204	0	0.00144	0.0669	0.072	0.02736	0.02604	0	0.3525	0.00016	0	0	0	0.39126	0.4338	0	0.0004	0.00072	0	0	0.00284	0.01578	0.03132	0.46092	0.00136	0.0018
K	0.0102	6e-05	0.00066	0.00234	0.0076	0	0	0.00102	0.00018	0	0	4e-05	0	0	0	0	0.00064	0.00044	0	0	0.00126	0	0	0	0	0.00012	0	0.00054	0.0003	0	0	0.02016	0	0	0.00068	0	0.03486	0.1005	0	0.00032	0	0	0.0004	0.00012	0.00054	0.00078	0.05388	0.001	0.00024
Ni	0.002	0.00066	0.00138	0.00072	0.0073	0	0	0.00066	0.00078	0	0	0.0058	0.00532	0.00204	0	0.00812	0.00724	0.0022	0.00018	0.00012	0.00084	6e-05	0.00716	0.00096	0.0016	0.00808	0.00144	0.00012	0.0003	6e-05	0.0038	0.0006	0.00636	0.00656	0.00292	0.004	0.00018	0	0.00504	0.00212	0.00708	0.00476	0.00744	0.00196	0	0	0.00024	0.00708	0.00656
Total	8.897	4.02876	4.04376	4.07316	8.5998	4.02876	4.04568	4.02258	4.0185	0	0	3.00576	2.98588	2.98796	0	3.00936	3.00508	3.00864	4.06368	4.05186	4.0509	4.04652	3.00732	4.0263	3.00512	3.00328	4.05066	4.04388	4.03536	4.03602	7.6515	3.75918	3.00812	3.0114	3.00396	3.00448	3.77652	3.79638	3.01088	3.01084	3.00512	3.00396	3.0078	2.99716	4.01856	4.04352	3.79218	3.00576	3.00964
ni (ppm)												2278.82	2145.23	777.942		3268.93	2915.32	864.38					2883.89		620.782	3268.93							2553.85	2624.57	1170.84	1595.17			2043.08	840.806	2844.6	1917.35	2993.9	777.942				2828.88	2648.15
Mg #												0.928407	0.927743	0.882848		0.928798	0.931169	0.887441					0.934047		0.877405	0.934774							0.909791	0.914494	0.903074	0.907894			0.928579	0.887267	0.927655	0.920769	0.92245	0.879441				0.91699	0.930862
CH1	CH2	CH3		Counting time
				Peak	-ve bg	+bg
Na	K	Fe		2 x 10	2 x 5	2 x 5
Mg	Ca	Mn		2 x 10	2 x 5	2 x 5																														0.258335
Al	Ti	Ni		2 x 10	2 x 5	2 x 5
Si		Cr		2 x 10	2 x 5	2 x 5
				2 x 10	2 x 5	2 x 5
[truncated: 71 more columns]

## Sheet: emc02f3f2
Generated from emc02.TXT by VB Plum system Version 1.09 on 12/08/2010 at 12:26:57
	5	15	74	94	116	120
	++++	++++	++++	++++	++++	++++
SiO2	1.252	0	0.021	0.182	0.227	0.12
TiO2	2.061	3.431	4.631	4.195	4.203	4.296
Al2O3	7.384	5.062	7.135	7.848	8.91	7.739
Cr2O3	16.891	0.012	0.153	0	0.03	0
Fe2O3	38.161	50.05	53.09	52.312	51.018	53.055
FeO	21.479	19.832	26.527	26.098	26.641	26.533
MnO	0.795	0.551	0.354	0.356	0.399	0.319
MgO	7.153	6.625	5.824	5.79	5.594	5.585
CaO	0.951	0.003	0	0.155	0.19	0.274
Na2O	0.086	0	0	0	0	0.023
K2O	0.058	0	0.008	0.011	0.015	0
NiO	0.089	0.061	0.07	0.027	0.033	0.043
Total	96.359	85.626	97.813	96.974	97.26	97.988
O	4	4	4	4	4	4
Si	0.0446	0	0.0008	0.0066	0.0082	0.0043
Ti	0.0552	0.1057	0.1256	0.1141	0.1135	0.116
Al	0.3101	0.2445	0.3032	0.3347	0.3773	0.3275
Cr	0.4758	0.0004	0.0044	0	0.0009	0
Fe3	1.0231	1.5436	1.4402	1.4243	1.3792	1.4335
Fe2	0.6399	0.6797	0.7998	0.7897	0.8004	0.7967
Mn	0.024	0.0191	0.0108	0.0109	0.0121	0.0097
Mg	0.3799	0.4047	0.313	0.3123	0.2996	0.2989
Ca	0.0363	0.0001	0	0.006	0.0073	0.0105
Na	0.0059	0	0	0	0	0.0016
K	0.0026	0	0.0004	0.0005	0.0007	0
Ni	0.0026	0.002	0.002	0.0008	0.001	0.0012
Total	3	3	3	3	3	3
