# Supplementary material for: The Petrology & Geochemistry of REE-Enriched, Alkaline Vol-Canic Rocks of Ambitle Island, Feni Island Group, Papua New Guinea
Source: Preprints.org preprint supplement (doi:10.20944/preprints202306.0971.v1), 2023-06-14
Supplement: Supplementary file 16 [file emc03.xlsx]

## Sheet: emc03
Generated from emc03.TXT by VB Plum system Version 1.09 on 12/08/2010 at 12:08:24								15 kV	30 nA	10 μm
	1	2	3	4	5	6	7	8	9	10	11	12	13	14	15	16	17	18	19	20	21	22	23	24	25	26	27	28	29	30	31	32	33	34	35	36	37	38	39	40	41	42	43	44	45	46	47	48	49
	++++	++++	++++	++++	++++	++++	++++	++++	++++	++++	++++	++++	++++	++++	++++	++++	++++	++++	++++	++++	++++	++++	++++	++++	++++	++++	++++	++++	++++	++++	++++	++++	++++	++++	++++	++++	++++	++++	++++	++++	++++	++++	++++	++++	++++	++++	++++	++++	++++
SiO2	55.934	55.301	54.947	55.372	56.164	0.197	53.714	57.893	56.143	40.565	37.888	41.15	57.978	57.506	55.806	40.89	40.578	40.221	40.911	40.725	39.924	40.003	40.513	41.038	41.192	40.36	40.623	40.461	40.495	39.922	40.257	39.723	1.252	0	55.891	57.692	40.266	40.084	55.29	57.873	57.914	56.892	40.254	54.942	57.919	55.46	56.228	40.272	41.016
TiO2	0	0	0	0.003	0	4.351	0.075	0	0.038	2.284	3.531	2.03	0.047	0	0	2.36	1.8	2.27	1.98	1.946	1.944	2.026	1.99	1.922	1.869	2.291	2.133	1.837	1.84	1.993	2.526	2.325	0.001	4.605	0	0	1.806	2.229	0	0	0	0	2.173	0	0	0.005	0.038	2.212	2.184
Al2O3	26.945	27.242	27.541	27.419	27.434	1.7	28.559	25.894	26.699	12.441	14.385	12.464	25.844	25.827	26.903	12.234	13.183	12.362	12.429	13.118	13.052	13.434	13.349	12.717	12.765	12.331	13.012	13.516	13.081	13.464	12.327	12.862	0.218	1.072	27.027	26.135	13.216	12.517	27.563	25.621	25.642	26.647	12.854	27.524	25.882	27.153	26.906	12.992	12.05
Cr2O3	0.01	0.014	0	0	0	0.022	0.047	0	0.035	0	0	0.021	0.019	0.023	0.002	0	0	0	0	0	0.03	0	0.019	0.007	0.039	0.022	0.009	0.034	0.006	0.007	0	0	0.014	0.016	0.008	0	0.007	0.002	0	0.01	0.006	0	0	0.019	0	0	0	0	0.007
FeO	0.423	0.398	0.482	0.531	0.466	79.309	0.391	0.448	0.461	12.334	10.393	10.937	0.409	0.424	0.529	12.792	12.394	13.056	10.952	11.312	11.172	11.887	11.379	11.482	11.139	13.139	13.545	12.308	12.472	12.697	12.932	13.38	0.817	83.359	0.369	0.461	13.318	12.892	0.48	0.399	0.41	0.411	12.49	0.425	0.373	0.471	0.546	13.193	12.635
MnO	0.001	0.003	0.016	0.014	0	2.165	0.035	0.023	0	0.267	0.516	0.085	0.03	0	0	0.301	0.223	0.35	0.14	0.1	0.153	0.213	0.12	0.124	0.168	0.292	0.345	0.215	0.202	0.217	0.372	0.329	0.062	1.566	0.013	0	0.3	0.336	0.006	0.04	0.012	0	0.302	0.007	0.006	0.006	0.014	0.319	0.241
MgO	0.019	0.006	0.022	0.002	0	0.841	0.02	0.025	0.021	13.13	17.801	14.434	0	0.031	0.005	13.011	13.025	12.641	14.607	13.803	13.428	13.671	13.929	14.45	14.124	12.451	12.758	13.739	13.178	12.849	12.508	12.233	0.386	0.869	0.041	0.009	12.498	12.801	0.019	0.009	0.006	0	12.775	0	0	0.034	0.053	12.484	12.832
CaO	9.297	9.663	10.102	9.987	9.666	0.34	11.394	8.036	9.242	12.281	0.066	12.312	7.903	7.955	9.283	12.133	12.262	12.016	12.185	12.438	12.511	12.38	12.257	12.247	12.206	12.019	12.107	12.297	12.405	12.313	12.114	12.155	52.242	0.022	9.357	8.287	12.215	12.228	9.889	8.091	7.815	8.827	12.249	10.047	8.031	9.753	9.178	12.414	12.064
Na2O	6.043	5.837	5.628	5.851	5.756	0.014	4.768	6.611	6.076	2.604	0.742	2.73	6.525	6.486	6.095	2.695	2.873	2.744	2.778	2.848	2.765	2.591	2.552	2.769	2.669	2.738	2.732	2.631	2.774	2.92	2.569	2.543	0.114	0.136	5.902	6.695	2.735	2.656	5.714	6.568	6.61	6.084	2.634	5.517	6.697	5.872	6.317	2.721	2.653
K2O	0.619	0.517	0.438	0.341	0.431	0.16	0.338	0.824	0.576	1.435	9.578	1.231	0.782	0.787	0.384	1.472	1.296	1.455	1.221	1.339	1.228	1.292	1.323	1.274	1.244	1.51	1.324	1.376	1.241	1.298	1.625	1.765	0.075	0.01	0.607	0.575	1.295	1.435	0.443	0.824	0.891	0.696	1.447	0.498	0.69	0.541	0.469	1.379	1.52
NiO	0.037	0.017	0.048	0	0.002	0	0	0	0	0	0.012	0.001	0.001	0	0	0.002	0	0.007	0.017	0.003	0.029	0.024	0	0.017	0.018	0.06	0.012	0.007	0.008	0	0.001	0.012	0	0.069	0.01	0.02	0.003	0.039	0	0.001	0.003	0	0.007	0.015	0	0.008	0.019	0.003	0
Total	99.328	98.997	99.224	99.521	99.918	89.1	99.342	99.756	99.291	97.34	94.913	97.396	99.539	99.04	99.007	97.889	97.634	97.125	97.22	97.633	96.237	97.521	97.432	98.048	97.434	97.213	98.601	98.42	97.703	97.68	97.231	97.33	55.181	91.723	99.225	99.874	97.658	97.22	99.404	99.437	99.31	99.558	97.185	98.994	99.598	99.303	99.768	97.987	97.203
O	10	10	10	10	10	10	10	10	10	10	10	10	10	10	10	10	10	10	10	10	10	10	10	10	10	10	10	10	10	10	10	10	10	10	10	10	10	10	10	10	10	10	10	10	10	10	10	10	10
Si	3.1754	3.1513	3.1285	3.1412	3.1653	0.0247	3.0602	3.2607	3.1869	2.6466	2.5412	2.6587	3.2681	3.2597	3.1756	2.6576	2.6368	2.6419	2.6502	2.6336	2.622	2.5988	2.6226	2.6418	2.661	2.6494	2.6279	2.6072	2.6309	2.6014	2.6417	2.6131	0.2075	0	3.1738	3.2458	2.6281	2.6297	3.1385	3.2696	3.2741	3.2135	2.6334	3.1328	3.2639	3.1533	3.1784	2.6223	2.6808
Ti	0	0	0	0.0001	0	0.4097	0.0032	0	0.0016	0.112	0.1781	0.0986	0.002	0	0	0.1154	0.088	0.1122	0.0964	0.0947	0.096	0.099	0.0969	0.0931	0.0908	0.1131	0.1038	0.089	0.0899	0.0977	0.1247	0.115	0.0001	0.4255	0	0	0.0886	0.11	0	0	0	0	0.1069	0	0	0.0002	0.0016	0.1083	0.1073
Al	1.803	1.8298	1.8483	1.8334	1.8224	0.2509	1.9178	1.7191	1.7864	0.9567	1.1373	0.9492	1.7171	1.7255	1.8045	0.9372	1.0097	0.9571	0.949	0.9999	1.0104	1.0287	1.0186	0.9649	0.972	0.9541	0.9921	1.0266	1.0017	1.0341	0.9535	0.9973	0.0426	0.1552	1.809	1.7331	1.0167	0.9679	1.8442	1.7061	1.7087	1.7741	0.9912	1.8499	1.7192	1.8197	1.7927	0.9971	0.9283
Cr	0.0005	0.0006	0	0	0	0.0022	0.0021	0	0.0016	0	0	0.0011	0.0009	0.001	0.0001	0	0	0	0	0	0.0016	0	0.001	0.0004	0.002	0.0012	0.0005	0.0017	0.0003	0.0004	0	0	0.0019	0.0016	0.0004	0	0.0004	0.0001	0	0.0005	0.0003	0	0	0.0009	0	0	0	0	0.0004
Fe2	0.0201	0.019	0.0229	0.0252	0.0219	8.3048	0.0186	0.0211	0.0219	0.673	0.583	0.591	0.0193	0.0201	0.0252	0.6953	0.6735	0.7172	0.5934	0.6118	0.6136	0.6458	0.616	0.6181	0.6018	0.7213	0.7328	0.6633	0.6777	0.6919	0.7097	0.7361	0.1132	8.5652	0.0175	0.0217	0.727	0.7073	0.0228	0.0189	0.0194	0.0194	0.6834	0.0203	0.0176	0.0224	0.0258	0.7184	0.6907
Mn	0	0.0001	0.0008	0.0007	0	0.2297	0.0017	0.0011	0	0.0147	0.0293	0.0046	0.0014	0	0	0.0166	0.0123	0.0195	0.0077	0.0055	0.0085	0.0117	0.0066	0.0068	0.0092	0.0162	0.0189	0.0117	0.0111	0.012	0.0207	0.0183	0.0086	0.1629	0.0006	0	0.0166	0.0187	0.0003	0.0019	0.0006	0	0.0167	0.0003	0.0003	0.0003	0.0007	0.0176	0.0134
Mg	0.0016	0.0005	0.0019	0.0002	0	0.157	0.0017	0.0021	0.0018	1.277	1.7798	1.3902	0	0.0026	0.0004	1.2606	1.2617	1.2378	1.4105	1.3306	1.3146	1.324	1.3441	1.3867	1.3601	1.2184	1.2303	1.3197	1.2763	1.2481	1.2235	1.1996	0.0953	0.1591	0.0035	0.0008	1.216	1.2519	0.0016	0.0008	0.0005	0	1.2459	0	0	0.0029	0.0044	1.2117	1.2502
Ca	0.5655	0.59	0.6163	0.6071	0.5837	0.0457	0.6955	0.485	0.5621	0.8585	0.0047	0.8523	0.4773	0.4831	0.566	0.845	0.8538	0.8457	0.8458	0.8619	0.8804	0.8618	0.8502	0.8448	0.8449	0.8454	0.8392	0.849	0.8636	0.8597	0.8518	0.8568	9.2747	0.0029	0.5693	0.4996	0.8543	0.8596	0.6015	0.4898	0.4734	0.5343	0.8587	0.6139	0.4849	0.5942	0.5559	0.8661	0.8449
Na	0.6652	0.6449	0.6213	0.6436	0.629	0.0034	0.5267	0.722	0.6688	0.3294	0.0965	0.342	0.7131	0.7129	0.6726	0.3396	0.362	0.3495	0.3489	0.3571	0.3521	0.3263	0.3204	0.3457	0.3344	0.3485	0.3427	0.3287	0.3495	0.3689	0.3269	0.3244	0.0367	0.0325	0.6499	0.7304	0.3461	0.3379	0.6289	0.7195	0.7246	0.6664	0.3341	0.6099	0.7318	0.6474	0.6923	0.3435	0.3363
K	0.0448	0.0376	0.0318	0.0247	0.031	0.0255	0.0246	0.0592	0.0417	0.1195	0.8196	0.1015	0.0562	0.0569	0.0279	0.122	0.1074	0.122	0.1009	0.1105	0.1029	0.1071	0.1093	0.1046	0.1026	0.1265	0.1093	0.1131	0.1029	0.1079	0.136	0.1482	0.0158	0.0016	0.044	0.0412	0.1078	0.1201	0.0321	0.0594	0.0642	0.0501	0.1208	0.0362	0.0496	0.0393	0.0338	0.1145	0.1268
Ni	0.0017	0.0008	0.0022	0	0.0001	0	0	0	0	0	0.0007	0.0001	0	0	0	0.0001	0	0.0004	0.0009	0.0002	0.0015	0.0013	0	0.0009	0.0009	0.0031	0.0006	0.0004	0.0004	0	0.0001	0.0006	0	0.0068	0.0005	0.0009	0.0002	0.0021	0	0	0.0001	0	0.0004	0.0007	0	0.0004	0.0009	0.0002	0
Total	6.2779	6.2747	6.274	6.2761	6.2535	9.4536	6.2523	6.2704	6.2727	6.9875	7.1701	6.9893	6.2556	6.2619	6.2723	6.9893	7.0052	7.0031	7.0037	7.0056	7.0036	7.0045	6.9856	7.0077	6.9797	6.9973	6.998	7.0105	7.0044	7.0221	6.9885	7.0095	9.7964	9.5132	6.2685	6.2735	7.0017	7.0053	6.2699	6.2665	6.2659	6.2577	6.9915	6.2649	6.2672	6.28	6.2866	6.9999	6.979
O	8	8	8	8	8	0	8	8	8	23	23	23	23	8	8	23	23	23	23	23	23	23	23	6	6	6	23	23	6	6	6	6	0	0	8	8	6	6	8	8	8	8	23	8	8	8	8	10	6
Si	2.54032	2.52104	2.5028	2.51296	2.53224	0	2.44816	2.60856	2.54952	6.08718	5.84476	6.11501	7.51663	2.60776	2.54048	6.11248	6.06464	6.07637	6.09546	6.05728	6.0306	5.97724	6.03198	1.58508	1.5966	1.58964	6.04417	5.99656	1.57854	1.56084	1.58502	1.56786	0	0	2.53904	2.59664	1.57686	1.57782	2.5108	2.61568	2.61928	2.5708	6.05682	2.50624	2.61112	2.52264	2.54272	2.6223	1.60848
Ti	0	0	0	8e-05	0	0	0.00256	0	0.00128	0.2576	0.40963	0.22678	0.0046	0	0	0.26542	0.2024	0.25806	0.22172	0.21781	0.2208	0.2277	0.22287	0.05586	0.05448	0.06786	0.23874	0.2047	0.05394	0.05862	0.07482	0.069	0	0	0	0	0.05316	0.066	0	0	0	0	0.24587	0	0	0.00016	0.00128	0.1083	0.06438
Al	1.4424	1.46384	1.47864	1.46672	1.45792	0	1.53424	1.37528	1.42912	2.20041	2.61579	2.18316	3.94933	1.3804	1.4436	2.15556	2.32231	2.20133	2.1827	2.29977	2.32392	2.36601	2.34278	0.57894	0.5832	0.57246	2.28183	2.36118	0.60102	0.62046	0.5721	0.59838	0	0	1.4472	1.38648	0.61002	0.58074	1.47536	1.36488	1.36696	1.41928	2.27976	1.47992	1.37536	1.45576	1.43416	0.9971	0.55698
Cr	0.0004	0.00048	0	0	0	0	0.00168	0	0.00128	0	0	0.00253	0.00207	0.0008	8e-05	0	0	0	0	0	0.00368	0	0.0023	0.00024	0.0012	0.00072	0.00115	0.00391	0.00018	0.00024	0	0	0	0	0.00032	0	0.00024	6e-05	0	0.0004	0.00024	0	0	0.00072	0	0	0	0	0.00024
Fe2	0.01608	0.0152	0.01832	0.02016	0.01752	0	0.01488	0.01688	0.01752	1.5479	1.3409	1.3593	0.04439	0.01608	0.02016	1.59919	1.54905	1.64956	1.36482	1.40714	1.41128	1.48534	1.4168	0.37086	0.36108	0.43278	1.68544	1.52559	0.40662	0.41514	0.42582	0.44166	0	0	0.014	0.01736	0.4362	0.42438	0.01824	0.01512	0.01552	0.01552	1.57182	0.01624	0.01408	0.01792	0.02064	0.7184	0.41442
Mn	0	8e-05	0.00064	0.00056	0	0	0.00136	0.00088	0	0.03381	0.06739	0.01058	0.00322	0	0	0.03818	0.02829	0.04485	0.01771	0.01265	0.01955	0.02691	0.01518	0.00408	0.00552	0.00972	0.04347	0.02691	0.00666	0.0072	0.01242	0.01098	0	0	0.00048	0	0.00996	0.01122	0.00024	0.00152	0.00048	0	0.03841	0.00024	0.00024	0.00024	0.00056	0.0176	0.00804
Mg	0.00128	0.0004	0.00152	0.00016	0	0	0.00136	0.00168	0.00144	2.9371	4.09354	3.19746	0	0.00208	0.00032	2.89938	2.90191	2.84694	3.24415	3.06038	3.02358	3.0452	3.09143	0.83202	0.81606	0.73104	2.82969	3.03531	0.76578	0.74886	0.7341	0.71976	0	0	0.0028	0.00064	0.7296	0.75114	0.00128	0.00064	0.0004	0	2.86557	0	0	0.00232	0.00352	1.2117	0.75012
Ca	0.4524	0.472	0.49304	0.48568	0.46696	0	0.5564	0.388	0.44968	1.97455	0.01081	1.96029	1.09779	0.38648	0.4528	1.9435	1.96374	1.94511	1.94534	1.98237	2.02492	1.98214	1.95546	0.50688	0.50694	0.50724	1.93016	1.9527	0.51816	0.51582	0.51108	0.51408	0	0	0.45544	0.39968	0.51258	0.51576	0.4812	0.39184	0.37872	0.42744	1.97501	0.49112	0.38792	0.47536	0.44472	0.8661	0.50694
Na	0.53216	0.51592	0.49704	0.51488	0.5032	0	0.42136	0.5776	0.53504	0.75762	0.22195	0.7866	1.64013	0.57032	0.53808	0.78108	0.8326	0.80385	0.80247	0.82133	0.80983	0.75049	0.73692	0.20742	0.20064	0.2091	0.78821	0.75601	0.2097	0.22134	0.19614	0.19464	0	0	0.51992	0.58432	0.20766	0.20274	0.50312	0.5756	0.57968	0.53312	0.76843	0.48792	0.58544	0.51792	0.55384	0.3435	0.20178
K	0.03584	0.03008	0.02544	0.01976	0.0248	0	0.01968	0.04736	0.03336	0.27485	1.88508	0.23345	0.12926	0.04552	0.02232	0.2806	0.24702	0.2806	0.23207	0.25415	0.23667	0.24633	0.25139	0.06276	0.06156	0.0759	0.25139	0.26013	0.06174	0.06474	0.0816	0.08892	0	0	0.0352	0.03296	0.06468	0.07206	0.02568	0.04752	0.05136	0.04008	0.27784	0.02896	0.03968	0.03144	0.02704	0.1145	0.07608
Ni	0.00136	0.00064	0.00176	0	8e-05	0	0	0	0	0	0.00161	0.00023	0	0	0	0.00023	0	0.00092	0.00207	0.00046	0.00345	0.00299	0	0.00054	0.00054	0.00186	0.00138	0.00092	0.00024	0	6e-05	0.00036	0	0	0.0004	0.00072	0.00012	0.00126	0	0	8e-05	0	0.00092	0.00056	0	0.00032	0.00072	0.0002	0
Total	5.02232	5.01976	5.0192	5.02088	5.0028	0	5.00184	5.01632	5.01816	16.0712	16.4912	16.0754	14.3879	5.00952	5.01784	16.0754	16.112	16.1071	16.1085	16.1129	16.1083	16.1104	16.0669	4.20462	4.18782	4.19838	16.0954	16.1242	4.20264	4.21326	4.1931	4.2057	0	0	5.0148	5.0188	4.20102	4.20318	5.01592	5.0132	5.01272	5.00616	16.0805	5.01192	5.01376	5.024	5.02928	6.9999	4.1874
X	73.393	73.797	74.438	73.104	70.427	70.242	70.55	70.237	71.733	72.859	72.737	71.261	70.797	70.797	70.718	70.333	70.32	71.2	71.256	72.69	72.959	70.4	70.197	69.751	69.74	69.64	69.597	69.644	62.414	62.578	62.831	63.001	63.057	62.888	62.006	61.455	61.57	61.856	61.168	61.239	61.405	62.083	62.514	61.644	62.319	62.934	62.81	62.877	61.129
Y	51.837	51.433	50.378	51.818	54.613	54.336	54.254	55.453	52.911	46.626	46.724	46.716	46.737	46.737	46.724	46.372	46.453	46.745	46.715	46.592	46.611	49.291	49.186	51.071	51.067	50.992	51.53	51.485	54.252	54.193	55.231	55.618	55.553	55.042	55.622	55.79	57.374	57.29	57.776	57.818	57.845	58.078	59.693	61.743	61.824	61.851	62.256	62.272	62.145
CH1	CH2	CH3		Counting time
				Peak	-ve bg	+bg
Na	K	Fe		2 x 10	2 x 5	2 x 5
Mg	Ca	Mn		2 x 10	2 x 5	2 x 5
Al	Ti	Ni		2 x 10	2 x 5	2 x 5
Si		Cr		2 x 10	2 x 5	2 x 5
[truncated: 33 more columns]

## Sheet: emc03f3f2
Generated from emc03.TXT by VB Plum system Version 1.09 on 12/08/2010 at 14:14:58
	6	34	50	53	57	68	69	81	82
	++++	++++	++++	++++	++++	++++	++++	++++	++++
SiO2	0.197	0	0.125	0.003	0.047	0.294	0.172	0.022	1.064
TiO2	4.351	4.605	5.018	4.209	4.005	4.118	2.681	3.891	4.304
Al2O3	1.7	1.072	1.217	2.745	2.274	2.072	3.298	2.36	8.831
Cr2O3	0.022	0.016	0.07	0.023	0	0.014	0.034	0.081	0.01
Fe2O3	55.288	58.065	54.141	52.358	56.816	54.751	56.627	57.161	47.846
FeO	29.56	31.111	32.961	29.13	32.045	32.387	29.668	31.297	26.879
MnO	2.165	1.566	1.024	1.21	1.108	1.252	1.054	1.726	0.312
MgO	0.841	0.869	0.293	1.479	0.733	0.21	1.184	0.707	5.804
CaO	0.34	0.022	0.01	0.006	0.004	0	0.079	0.035	0.304
Na2O	0.014	0.136	0	0	0	0.019	0	0.015	0.011
K2O	0.16	0.01	0	0	0	0.002	0.006	0.007	0
NiO	0	0.069	0.041	0.083	0	0.062	0.082	0.004	0.044
Total	94.639	97.54	94.901	91.245	97.032	95.18	94.884	97.306	95.41
O	4	4	4	4	4	4	4	4	4
Si	0.0078	0	0.005	0.0001	0.0018	0.0117	0.0067	0.0009	0.0387
Ti	0.13	0.1342	0.1509	0.1292	0.1168	0.1229	0.0792	0.1131	0.1177
Al	0.0796	0.0489	0.0573	0.1321	0.104	0.0969	0.1527	0.1076	0.3785
Cr	0.0007	0.0005	0.0022	0.0007	0	0.0004	0.0011	0.0025	0.0003
Fe3	1.6532	1.693	1.6287	1.6085	1.6587	1.6351	1.6746	1.6634	1.3093
Fe2	0.9823	1.0081	1.102	0.9945	1.0397	1.0749	0.975	1.0122	0.8174
Mn	0.0729	0.0514	0.0347	0.0418	0.0364	0.0421	0.0351	0.0565	0.0096
Mg	0.0498	0.0502	0.0175	0.09	0.0424	0.0124	0.0693	0.0408	0.3146
Ca	0.0145	0.0009	0.0004	0.0003	0.0002	0	0.0033	0.0015	0.0118
Na	0.0011	0.0102	0	0	0	0.0015	0	0.0011	0.0008
K	0.0081	0.0005	0	0	0	0.0001	0.0003	0.0003	0
Ni	0	0.0021	0.0013	0.0027	0	0.002	0.0026	0.0001	0.0013
Total	3	3	3	3	3	3	3	3	3
