# Supplementary material for: The Petrology & Geochemistry of REE-Enriched, Alkaline Vol-Canic Rocks of Ambitle Island, Feni Island Group, Papua New Guinea
Source: Preprints.org preprint supplement (doi:10.20944/preprints202306.0971.v1), 2023-06-14
Supplement: Supplementary file 17 [file emc04.xlsx]

## Sheet: emc04
Generated from emc04.TXT by VB Plum system Version 1.09 on 13/08/2010 at 08:47:17								15 kV	30 nA	Focus μm
	1	2	3	4	5	6	7	8	9	10	11	12	13	14	15	16	17	18	19	20	21	22	23	24	25	26	27	28	29	30	31	32	33	34	35	36	37	38	39	40	41	42	43	44	45	46	47	48	49
	++++	++++	++++	++++	++++	++++	++++	++++	++++	++++	++++	++++	++++	++++	++++	++++	++++	++++	++++	++++	++++	++++	++++	++++	++++	++++	++++	++++	++++	++++	++++	++++	++++	++++	++++	++++	++++	++++	++++	++++	++++	++++	++++	++++	++++	++++	++++	++++	++++
SiO2	0.774	0.289	0.096	62.949	0.135	0.581	0.068	0.097	0.058	0.868	0.028	0.098	0.069	0.071	0.04	0.087	0.036	0.09	0.125	0.131	0.05	0.018	0.081	0.026	0.057	0.009	0.082	0.349	0.01	0	0.082	0	0	0	0	0	0	0	2.793	0	0.288	0	0	0	0.249	0.001	0.04	0.042	0.026
TiO2	4.322	4.684	4.055	0	4.669	4.665	4.325	4.531	4.348	4.435	4.259	4.409	4.557	4.46	4.411	4.41	4.285	4.725	4.338	4.451	4.462	4.605	4.543	4.455	4.49	4.131	5.031	5.768	8.862	2.431	4.082	2.737	5.656	3.359	3.98	3.789	4.761	4.319	0	5.801	4.612	2.876	3.158	8.653	0	3.668	4.342	4.437	3.911
Al2O3	8.829	7.751	6.863	21.395	7.675	7.779	7.899	7.872	7.637	7.855	7.382	7.743	7.835	7.601	6.845	6.996	7.253	7.882	6.576	7.021	7.595	8.124	6.621	6.475	7.612	1.029	2.001	1.229	1.376	2.464	2.773	1.715	1.241	2.491	2.453	2.553	1.98	2.401	1.079	1.1	2.448	2.563	2.004	1.317	0	1.836	2.42	2.409	2.815
Cr2O3	0	0.034	0.003	0	0	0.001	0.012	0.01	0.019	0.004	0.012	0	0	0.013	0	0	0.062	0.022	0.018	0.007	0	0.052	0.001	0.05	0.041	0	0.037	0.02	0.006	0.032	0	0	0.043	0.028	0.016	0	0.021	0	0.025	0.024	0.007	0.042	0.041	0.007	0	0.013	0.014	0.076	0.053
FeO	20.613	76.331	76.74	0.866	77.237	75.747	75.266	75.966	75.852	74.881	76.831	76.399	76.153	74.37	76.204	77.269	75.812	75.392	75.976	76.26	75.376	74.815	76.557	77.054	76.916	81.722	83.316	83.893	77.407	83.981	80.67	81.442	82.534	84.541	82.677	82.82	83.916	82.326	58.87	81.288	82.856	84.674	82.358	77.515	0.051	84.033	79.337	80.637	81.364
MnO	0.171	0.456	0.375	0.027	0.464	0.426	0.424	0.381	0.31	0.448	0.318	0.385	0.382	0.384	0.353	0.284	0.312	0.337	0.305	0.246	0.39	0.36	0.355	0.345	0.307	1.27	1.678	1.614	2.616	1.183	1.523	1.192	1.859	1.2	1.043	1.086	1.836	1.652	0.027	2.334	1.353	0.914	1.43	2.714	0.064	1.047	1.405	1.598	1.453
MgO	3.104	3.653	4.896	0.065	2.477	3.553	5.024	4.632	5.459	4.714	5.372	3.474	4.721	5.028	5.525	5.543	5.562	5.422	5.094	5.645	5.538	5.427	5.15	5.47	5.745	0.102	1.083	1.12	0.925	0.988	1.951	0.854	0.671	1.025	1.754	1.391	1.104	1.38	0	0.664	0.553	1.416	1.499	1.779	0.106	1.74	1.667	1.243	1.98
CaO	4.128	0.405	0.105	3.391	0.252	0.227	0.286	0.165	0.174	0.244	0.136	0.249	0.157	0.273	0.161	0.191	0.146	0.158	0.314	0.29	0.088	0.161	0.213	0.208	0.123	0.065	0	0	0	0	0	0.001	0	0.025	0.014	0.003	0	0	0.135	0	0.042	0	0	0	53.372	0	0	0	0
Na2O	4.526	0	0	6.216	0	0.058	0	0	0.058	0.028	0	0	0.019	0	0	0	0.064	0.037	0	0	0	0	0.077	0	0	0	0	0	0	0	0.004	0	0	0.027	0.043	0	0.009	0.047	0	0	0	0.014	0	0	0.025	0	0.061	0	0
K2O	1.669	0.055	0.027	5.065	0.019	0.061	0.032	0.036	0.052	0.083	0.033	0.022	0.067	0.045	0.025	0	0.013	0.053	0.026	0	0.004	0.051	0	0.037	0.031	0	0	0.008	0.013	0	0.012	0	0	0	0	0.009	0	0.013	0.032	0.047	0	0	0.011	0	0.008	0	0.024	0.006	0
NiO	0	0.02	0.045	0	0	0	0.067	0.005	0.058	0.034	0.007	0.04	0.076	0	0.055	0.037	0.047	0.014	0.027	0.032	0	0.026	0.064	0.075	0.036	0.02	0.064	0	0	0	0.067	0.059	0	0.003	0.026	0.006	0	0	0	0.004	0	0.032	0	0	0.029	0.047	0.057	0.025	0.051
Total	48.136	93.678	93.205	99.974	92.928	93.098	93.403	93.695	94.025	93.594	94.378	92.819	94.036	92.245	93.619	94.817	93.592	94.132	92.799	94.083	93.503	93.639	93.662	94.195	95.358	88.348	93.292	94.001	91.215	91.079	91.164	88	92.004	92.699	92.006	91.657	93.627	92.138	62.961	91.262	92.159	92.531	90.501	91.985	53.904	92.385	89.367	90.473	91.653
O	10	10	10	10	10	10	10	10	10	10	10	10	10	10	10	10	10	10	10	10	10	10	10	10	10	10	10	10	10	10	10	10	10	10	10	10	10	10	10	10	10	10	10	10	10	10	10	10	10
Si	0.1393	0.0316	0.0106	3.5472	0.015	0.0637	0.0074	0.0106	0.0063	0.0936	0.003	0.0109	0.0075	0.0078	0.0044	0.0094	0.0039	0.0097	0.0139	0.0142	0.0054	0.0019	0.0089	0.0028	0.0061	0.0012	0.0098	0.0412	0.0012	0	0.0099	0	0	0	0	0	0	0	0.4905	0	0.0346	0	0	0	0.0429	0.0001	0.0049	0.0051	0.0031
Ti	0.5852	0.3849	0.3374	0	0.3909	0.3844	0.3543	0.3708	0.3541	0.3598	0.3473	0.3675	0.3718	0.37	0.3633	0.3584	0.3517	0.3824	0.3617	0.3634	0.3649	0.3741	0.3752	0.3663	0.3604	0.3998	0.45	0.5117	0.7922	0.2264	0.3702	0.2653	0.5165	0.3051	0.3604	0.3455	0.4259	0.3909	0	0.5341	0.4171	0.2617	0.2944	0.7644	0	0.3341	0.4029	0.4081	0.3533
Al	1.8735	0.9982	0.8949	1.4211	1.0071	1.0045	1.0142	1.0096	0.9748	0.9988	0.9434	1.0115	1.0018	0.9884	0.8835	0.8911	0.9329	0.9998	0.8594	0.8984	0.9735	1.0343	0.857	0.8345	0.9575	0.1561	0.2805	0.1709	0.1928	0.3596	0.3941	0.2605	0.1776	0.3546	0.3481	0.3648	0.2776	0.3405	0.2233	0.1587	0.347	0.3655	0.2928	0.1823	0	0.2621	0.3519	0.3472	0.3986
Cr	0	0.0029	0.0003	0	0	0.0001	0.001	0.0009	0.0016	0.0003	0.001	0	0	0.0011	0	0	0.0053	0.0019	0.0016	0.0006	0	0.0044	0.0001	0.0043	0.0035	0	0.0035	0.0019	0.0006	0.0031	0	0	0.0041	0.0027	0.0015	0	0.002	0	0.0035	0.0023	0.0007	0.004	0.004	0.0007	0	0.0012	0.0014	0.0073	0.005
Fe2	3.1036	6.9751	7.1003	0.0408	7.1912	6.9402	6.8572	6.913	6.8699	6.7557	6.9666	7.0813	6.9088	6.8617	6.9792	6.9834	6.9189	6.7857	7.0452	6.9236	6.8549	6.7586	7.0311	7.0463	6.8648	8.795	8.2873	8.2763	7.6949	8.6967	8.1347	8.7782	8.3817	8.5398	8.3244	8.3973	8.3472	8.285	8.6459	8.3229	8.3327	8.5684	8.538	7.6151	0.0074	8.5106	8.1862	8.2467	8.1743
Mn	0.0261	0.0422	0.0351	0.0013	0.0438	0.0395	0.0391	0.0351	0.0284	0.0409	0.0292	0.0361	0.0351	0.0359	0.0327	0.026	0.0288	0.0307	0.0286	0.0226	0.0359	0.0329	0.033	0.032	0.0278	0.1384	0.169	0.1613	0.2634	0.1241	0.1555	0.1301	0.1912	0.1228	0.1064	0.1115	0.185	0.1684	0.004	0.242	0.1378	0.0937	0.1501	0.27	0.0093	0.1074	0.1468	0.1655	0.1478
Mg	0.833	0.595	0.8074	0.0055	0.4111	0.5803	0.8158	0.7513	0.8813	0.7581	0.8682	0.5739	0.7634	0.8269	0.9019	0.8929	0.9048	0.8698	0.842	0.9135	0.8977	0.8739	0.8431	0.8916	0.9139	0.0196	0.192	0.1969	0.1639	0.1824	0.3507	0.1641	0.1215	0.1846	0.3148	0.2514	0.1957	0.2475	0	0.1212	0.0991	0.2554	0.277	0.3115	0.0272	0.3141	0.3066	0.2266	0.3546
Ca	0.7963	0.0474	0.0124	0.2047	0.0301	0.0266	0.0334	0.0192	0.0202	0.0282	0.0158	0.0296	0.0182	0.0323	0.0189	0.0221	0.0171	0.0182	0.0373	0.0337	0.0103	0.0186	0.0251	0.0244	0.0141	0.009	0	0	0	0	0	0.0001	0	0.0032	0.0018	0.0004	0	0	0.0254	0	0.0054	0	0	0	9.8611	0	0	0	0
Na	1.5799	0	0	0.6792	0	0.0123	0	0	0.0122	0.0059	0	0	0.004	0	0	0	0.0135	0.0077	0	0	0	0	0.0164	0	0	0	0	0	0	0	0.0009	0	0	0.0063	0.01	0	0.0021	0.011	0	0	0	0.0033	0	0	0.0084	0	0.0146	0	0
K	0.3833	0.0077	0.0038	0.3641	0.0027	0.0085	0.0044	0.005	0.0072	0.0114	0.0046	0.0031	0.0093	0.0063	0.0035	0	0.0018	0.0073	0.0037	0	0.0006	0.007	0	0.0052	0.0042	0	0	0.0012	0.002	0	0.0018	0	0	0	0	0.0014	0	0.002	0.0072	0.0073	0	0	0.0017	0	0.0018	0	0.0038	0.0009	0
Ni	0	0.0018	0.004	0	0	0	0.0059	0.0004	0.0051	0.003	0.0006	0.0036	0.0066	0	0.0048	0.0032	0.0041	0.0012	0.0024	0.0028	0	0.0023	0.0057	0.0066	0.0031	0.0021	0.0061	0	0	0	0.0065	0.0061	0	0.0003	0.0025	0.0006	0	0	0	0.0004	0	0.0031	0	0	0.004	0.0046	0.0057	0.0025	0.0049
Total	9.3204	9.0868	9.2063	6.2639	9.0918	9.0601	9.1328	9.1159	9.161	9.0556	9.1798	9.1175	9.1265	9.1305	9.1923	9.1866	9.1829	9.1145	9.1958	9.1729	9.1432	9.1081	9.1955	9.214	9.1552	9.521	9.3982	9.3614	9.1109	9.5922	9.4243	9.6045	9.3926	9.5194	9.4699	9.4728	9.4354	9.4453	9.3997	9.389	9.3745	9.5552	9.5581	9.1441	9.9621	9.5342	9.4247	9.41	9.4417
O	10	10	10	10	10	10	10	10	10	10	10	10	10	10	10	10	10	10	10	10	10	10	10	10	10	10	10	10	10	10	10	10	10	10	10	10	10	10	10	10	10	10	10	10	10	10	10	10	10
Si	0.1393	0.0316	0.0106	3.5472	0.015	0.0637	0.0074	0.0106	0.0063	0.0936	0.003	0.0109	0.0075	0.0078	0.0044	0.0094	0.0039	0.0097	0.0139	0.0142	0.0054	0.0019	0.0089	0.0028	0.0061	0.0012	0.0098	0.0412	0.0012	0	0.0099	0	0	0	0	0	0	0	0.4905	0	0.0346	0	0	0	0.0429	0.0001	0.0049	0.0051	0.0031
Ti	0.5852	0.3849	0.3374	0	0.3909	0.3844	0.3543	0.3708	0.3541	0.3598	0.3473	0.3675	0.3718	0.37	0.3633	0.3584	0.3517	0.3824	0.3617	0.3634	0.3649	0.3741	0.3752	0.3663	0.3604	0.3998	0.45	0.5117	0.7922	0.2264	0.3702	0.2653	0.5165	0.3051	0.3604	0.3455	0.4259	0.3909	0	0.5341	0.4171	0.2617	0.2944	0.7644	0	0.3341	0.4029	0.4081	0.3533
Al	1.8735	0.9982	0.8949	1.4211	1.0071	1.0045	1.0142	1.0096	0.9748	0.9988	0.9434	1.0115	1.0018	0.9884	0.8835	0.8911	0.9329	0.9998	0.8594	0.8984	0.9735	1.0343	0.857	0.8345	0.9575	0.1561	0.2805	0.1709	0.1928	0.3596	0.3941	0.2605	0.1776	0.3546	0.3481	0.3648	0.2776	0.3405	0.2233	0.1587	0.347	0.3655	0.2928	0.1823	0	0.2621	0.3519	0.3472	0.3986
Cr	0	0.0029	0.0003	0	0	0.0001	0.001	0.0009	0.0016	0.0003	0.001	0	0	0.0011	0	0	0.0053	0.0019	0.0016	0.0006	0	0.0044	0.0001	0.0043	0.0035	0	0.0035	0.0019	0.0006	0.0031	0	0	0.0041	0.0027	0.0015	0	0.002	0	0.0035	0.0023	0.0007	0.004	0.004	0.0007	0	0.0012	0.0014	0.0073	0.005
Fe2	3.1036	6.9751	7.1003	0.0408	7.1912	6.9402	6.8572	6.913	6.8699	6.7557	6.9666	7.0813	6.9088	6.8617	6.9792	6.9834	6.9189	6.7857	7.0452	6.9236	6.8549	6.7586	7.0311	7.0463	6.8648	8.795	8.2873	8.2763	7.6949	8.6967	8.1347	8.7782	8.3817	8.5398	8.3244	8.3973	8.3472	8.285	8.6459	8.3229	8.3327	8.5684	8.538	7.6151	0.0074	8.5106	8.1862	8.2467	8.1743
Mn	0.0261	0.0422	0.0351	0.0013	0.0438	0.0395	0.0391	0.0351	0.0284	0.0409	0.0292	0.0361	0.0351	0.0359	0.0327	0.026	0.0288	0.0307	0.0286	0.0226	0.0359	0.0329	0.033	0.032	0.0278	0.1384	0.169	0.1613	0.2634	0.1241	0.1555	0.1301	0.1912	0.1228	0.1064	0.1115	0.185	0.1684	0.004	0.242	0.1378	0.0937	0.1501	0.27	0.0093	0.1074	0.1468	0.1655	0.1478
Mg	0.833	0.595	0.8074	0.0055	0.4111	0.5803	0.8158	0.7513	0.8813	0.7581	0.8682	0.5739	0.7634	0.8269	0.9019	0.8929	0.9048	0.8698	0.842	0.9135	0.8977	0.8739	0.8431	0.8916	0.9139	0.0196	0.192	0.1969	0.1639	0.1824	0.3507	0.1641	0.1215	0.1846	0.3148	0.2514	0.1957	0.2475	0	0.1212	0.0991	0.2554	0.277	0.3115	0.0272	0.3141	0.3066	0.2266	0.3546
Ca	0.7963	0.0474	0.0124	0.2047	0.0301	0.0266	0.0334	0.0192	0.0202	0.0282	0.0158	0.0296	0.0182	0.0323	0.0189	0.0221	0.0171	0.0182	0.0373	0.0337	0.0103	0.0186	0.0251	0.0244	0.0141	0.009	0	0	0	0	0	0.0001	0	0.0032	0.0018	0.0004	0	0	0.0254	0	0.0054	0	0	0	9.8611	0	0	0	0
Na	1.5799	0	0	0.6792	0	0.0123	0	0	0.0122	0.0059	0	0	0.004	0	0	0	0.0135	0.0077	0	0	0	0	0.0164	0	0	0	0	0	0	0	0.0009	0	0	0.0063	0.01	0	0.0021	0.011	0	0	0	0.0033	0	0	0.0084	0	0.0146	0	0
K	0.3833	0.0077	0.0038	0.3641	0.0027	0.0085	0.0044	0.005	0.0072	0.0114	0.0046	0.0031	0.0093	0.0063	0.0035	0	0.0018	0.0073	0.0037	0	0.0006	0.007	0	0.0052	0.0042	0	0	0.0012	0.002	0	0.0018	0	0	0	0	0.0014	0	0.002	0.0072	0.0073	0	0	0.0017	0	0.0018	0	0.0038	0.0009	0
Ni	0	0.0018	0.004	0	0	0	0.0059	0.0004	0.0051	0.003	0.0006	0.0036	0.0066	0	0.0048	0.0032	0.0041	0.0012	0.0024	0.0028	0	0.0023	0.0057	0.0066	0.0031	0.0021	0.0061	0	0	0	0.0065	0.0061	0	0.0003	0.0025	0.0006	0	0	0	0.0004	0	0.0031	0	0	0.004	0.0046	0.0057	0.0025	0.0049
Total	9.3204	9.0868	9.2063	6.2639	9.0918	9.0601	9.1328	9.1159	9.161	9.0556	9.1798	9.1175	9.1265	9.1305	9.1923	9.1866	9.1829	9.1145	9.1958	9.1729	9.1432	9.1081	9.1955	9.214	9.1552	9.521	9.3982	9.3614	9.1109	9.5922	9.4243	9.6045	9.3926	9.5194	9.4699	9.4728	9.4354	9.4453	9.3997	9.389	9.3745	9.5552	9.5581	9.1441	9.9621	9.5342	9.4247	9.41	9.4417
X	42.84	42.946	45.618	46.772	46.226	46.238	46.328	39.46	39.431	39.399	32.819	34.852	35.121	35.131	35.601	34.302	33.208	33.815	38.584	38.638	38.389	38.344	37.51	37.499	38.095	69.645	68.804	69.707	70.318	69.006	68.663	63.507	62.994	63.298	63.226	62.302	61.971	60.714	60.428	60.367	59.321	60.355	60.415	60.197	60.773	55.584	56.428	57.898	68.608
Y	66.82	66.86	64.941	64.327	65.154	65.22	65.205	47.498	47.514	47.512	49.551	49.332	50.466	50.321	51.89	59.671	61.309	62.141	55.313	55.472	58.423	58.496	59.201	59.143	65.049	45.126	45.727	46.018	57.438	57.723	62.561	63.015	64.083	65.284	66.771	67.499	67.825	69.443	69.403	71.968	70.321	67.924	67.802	66.135	61.862	64.878	64.405	62.485	62.558
CH1	CH2	CH3		Counting time
				Peak	-ve bg	+bg
Na	K	Fe		2 x 10	2 x 5	2 x 5
Mg	Ca	Mn		2 x 10	2 x 5	2 x 5
Al	Ti	Ni		2 x 10	2 x 5	2 x 5
Si		Cr		2 x 10	2 x 5	2 x 5
				2 x 10	2 x 5	2 x 5
[truncated: 10 more columns]

## Sheet: emc04f3f2
Generated from emc04.TXT by VB Plum system Version 1.09 on 13/08/2010 at 08:47:48
	2	3	5	6	7	8	9	10	11	12	13	14	15	16	17	18	19	20	21	22	23	24	25	26	27	28	29	30	31	32	33	34	35	36	37	38	40	41	42	43	44	46	47	48	49	50	51
	++++	++++	++++	++++	++++	++++	++++	++++	++++	++++	++++	++++	++++	++++	++++	++++	++++	++++	++++	++++	++++	++++	++++	++++	++++	++++	++++	++++	++++	++++	++++	++++	++++	++++	++++	++++	++++	++++	++++	++++	++++	++++	++++	++++	++++	++++	++++
SiO2	0.289	0.096	0.135	0.581	0.068	0.097	0.058	0.868	0.028	0.098	0.069	0.071	0.04	0.087	0.036	0.09	0.125	0.131	0.05	0.018	0.081	0.026	0.057	0.009	0.082	0.349	0.01	0	0.082	0	0	0	0	0	0	0	0	0.288	0	0	0	0.001	0.04	0.042	0.026	0	0.002
TiO2	4.684	4.055	4.669	4.665	4.325	4.531	4.348	4.435	4.259	4.409	4.557	4.46	4.411	4.41	4.285	4.725	4.338	4.451	4.462	4.605	4.543	4.455	4.49	4.131	5.031	5.768	8.862	2.431	4.082	2.737	5.656	3.359	3.98	3.789	4.761	4.319	5.801	4.612	2.876	3.158	8.653	3.668	4.342	4.437	3.911	4.304	3.612
Al2O3	7.751	6.863	7.675	7.779	7.899	7.872	7.637	7.855	7.382	7.743	7.835	7.601	6.845	6.996	7.253	7.882	6.576	7.021	7.595	8.124	6.621	6.475	7.612	1.029	2.001	1.229	1.376	2.464	2.773	1.715	1.241	2.491	2.453	2.553	1.98	2.401	1.1	2.448	2.563	2.004	1.317	1.836	2.42	2.409	2.815	2.074	2.348
Cr2O3	0.034	0.003	0	0.001	0.012	0.01	0.019	0.004	0.012	0	0	0.013	0	0	0.062	0.022	0.018	0.007	0	0.052	0.001	0.05	0.041	0	0.037	0.02	0.006	0.032	0	0	0.043	0.028	0.016	0	0.021	0	0.024	0.007	0.042	0.041	0.007	0.013	0.014	0.076	0.053	0.07	0.02
Fe2O3	51.462	54.654	50.669	50.462	53.115	52.625	54.352	51.101	54.901	51.716	53.132	52.373	54.761	55.306	54.65	53.161	54.196	54.607	53.547	52.755	54.712	55.546	54.961	55.653	56.557	55.916	48.025	59.877	56.554	57.863	55.231	59.246	57.981	57.664	57.662	57.287	54.677	55.237	60.188	58.834	49.596	59.524	55.282	55.348	57.278	56.929	57.789
FeO	30.025	27.562	31.644	30.341	27.473	28.614	26.945	28.9	27.431	29.864	28.345	27.244	26.93	27.504	26.638	27.557	27.21	27.124	27.194	27.346	27.326	27.073	27.461	31.644	32.426	33.579	34.194	30.103	29.782	29.376	32.837	31.231	30.505	30.934	32.031	30.778	32.089	33.153	30.516	29.419	32.888	30.472	29.594	30.834	29.825	30.801	30.799
MnO	0.456	0.375	0.464	0.426	0.424	0.381	0.31	0.448	0.318	0.385	0.382	0.384	0.353	0.284	0.312	0.337	0.305	0.246	0.39	0.36	0.355	0.345	0.307	1.27	1.678	1.614	2.616	1.183	1.523	1.192	1.859	1.2	1.043	1.086	1.836	1.652	2.334	1.353	0.914	1.43	2.714	1.047	1.405	1.598	1.453	1.555	1.069
MgO	3.653	4.896	2.477	3.553	5.024	4.632	5.459	4.714	5.372	3.474	4.721	5.028	5.525	5.543	5.562	5.422	5.094	5.645	5.538	5.427	5.15	5.47	5.745	0.102	1.083	1.12	0.925	0.988	1.951	0.854	0.671	1.025	1.754	1.391	1.104	1.38	0.664	0.553	1.416	1.499	1.779	1.74	1.667	1.243	1.98	1.342	1.281
CaO	0.405	0.105	0.252	0.227	0.286	0.165	0.174	0.244	0.136	0.249	0.157	0.273	0.161	0.191	0.146	0.158	0.314	0.29	0.088	0.161	0.213	0.208	0.123	0.065	0	0	0	0	0	0.001	0	0.025	0.014	0.003	0	0	0	0.042	0	0	0	0	0	0	0	0	0
Na2O	0	0	0	0.058	0	0	0.058	0.028	0	0	0.019	0	0	0	0.064	0.037	0	0	0	0	0.077	0	0	0	0	0	0	0	0.004	0	0	0.027	0.043	0	0.009	0.047	0	0	0.014	0	0	0	0.061	0	0	0	0
K2O	0.055	0.027	0.019	0.061	0.032	0.036	0.052	0.083	0.033	0.022	0.067	0.045	0.025	0	0.013	0.053	0.026	0	0.004	0.051	0	0.037	0.031	0	0	0.008	0.013	0	0.012	0	0	0	0	0.009	0	0.013	0.047	0	0	0.011	0	0	0.024	0.006	0	0.021	0
NiO	0.02	0.045	0	0	0.067	0.005	0.058	0.034	0.007	0.04	0.076	0	0.055	0.037	0.047	0.014	0.027	0.032	0	0.026	0.064	0.075	0.036	0.02	0.064	0	0	0	0.067	0.059	0	0.003	0.026	0.006	0	0	0.004	0	0.032	0	0	0.047	0.057	0.025	0.051	0	0
Total	98.834	98.681	98.004	98.154	98.724	98.967	99.47	98.714	99.878	98	99.359	97.492	99.105	100.358	99.067	99.458	98.229	99.554	98.868	98.924	99.144	99.76	100.864	93.924	98.958	99.603	96.027	97.078	96.83	93.797	97.537	98.635	97.815	97.434	99.404	97.877	96.74	97.693	98.561	96.395	96.954	98.349	94.906	96.018	97.392	97.096	96.92
O	4	4	4	4	4	4	4	4	4	4	4	4	4	4	4	4	4	4	4	4	4	4	4	4	4	4	4	4	4	4	4	4	4	4	4	4	4	4	4	4	4	4	4	4	4	4	4
Si	0.0104	0.0035	0.005	0.0211	0.0024	0.0035	0.0021	0.031	0.001	0.0036	0.0025	0.0026	0.0014	0.0031	0.0013	0.0032	0.0045	0.0047	0.0018	0.0006	0.0029	0.0009	0.002	0.0004	0.0031	0.0132	0.0004	0	0.0031	0	0	0	0	0	0	0	0	0.0111	0	0	0	0	0.0016	0.0016	0.001	0	0.0001
Ti	0.1271	0.1099	0.129	0.1273	0.1164	0.122	0.116	0.1192	0.1135	0.1209	0.1222	0.1216	0.1186	0.117	0.1149	0.1259	0.118	0.1188	0.1197	0.1232	0.1224	0.1193	0.1181	0.126	0.1436	0.164	0.2609	0.0708	0.1178	0.0829	0.165	0.0962	0.1142	0.1094	0.1354	0.1241	0.1707	0.1335	0.0822	0.0924	0.2508	0.1051	0.1282	0.1301	0.1123	0.125	0.1051
Al	0.3296	0.2916	0.3323	0.3326	0.3332	0.3323	0.3192	0.3309	0.3083	0.3328	0.3293	0.3248	0.2884	0.291	0.3048	0.3291	0.2804	0.2938	0.3194	0.3407	0.2796	0.2717	0.3138	0.0492	0.0895	0.0548	0.0635	0.1125	0.1255	0.0814	0.0567	0.1118	0.1103	0.1155	0.0883	0.1082	0.0507	0.111	0.1148	0.0919	0.0598	0.0825	0.112	0.1107	0.1266	0.0944	0.107
Cr	0.001	0.0001	0	0	0.0003	0.0003	0.0005	0.0001	0.0003	0	0	0.0004	0	0	0.0017	0.0006	0.0005	0.0002	0	0.0015	0	0.0014	0.0011	0	0.0011	0.0006	0.0002	0.001	0	0	0.0013	0.0008	0.0005	0	0.0006	0	0.0007	0.0002	0.0013	0.0013	0.0002	0.0004	0.0004	0.0023	0.0016	0.0021	0.0006
Fe3	1.397	1.4827	1.4007	1.3776	1.4303	1.4181	1.4505	1.3743	1.4639	1.4192	1.4257	1.4286	1.4728	1.4688	1.4661	1.4171	1.4752	1.459	1.4377	1.4125	1.4751	1.4882	1.4463	1.6982	1.6158	1.5907	1.4145	1.7449	1.6335	1.7529	1.612	1.6971	1.6641	1.6661	1.641	1.6477	1.6096	1.5996	1.7207	1.7226	1.4384	1.7068	1.6338	1.6238	1.6452	1.6545	1.6821
Fe2	0.9058	0.831	0.9722	0.9205	0.8222	0.8569	0.7992	0.8638	0.8128	0.9108	0.8453	0.8259	0.8049	0.8118	0.7942	0.8164	0.8232	0.8054	0.8114	0.8137	0.8188	0.8061	0.8031	1.0731	1.0296	1.0616	1.1192	0.975	0.956	0.989	1.0651	0.9942	0.973	0.9933	1.013	0.9838	1.0498	1.067	0.9695	0.9572	1.06	0.9711	0.972	1.0053	0.9521	0.9948	0.9963
Mn	0.0139	0.0115	0.0144	0.0131	0.0129	0.0116	0.0093	0.0136	0.0095	0.0119	0.0115	0.0118	0.0107	0.0085	0.0094	0.0101	0.0093	0.0074	0.0118	0.0108	0.0108	0.0104	0.0091	0.0436	0.054	0.0517	0.0867	0.0388	0.0495	0.0406	0.0611	0.0387	0.0337	0.0353	0.0588	0.0535	0.0773	0.0441	0.0294	0.0471	0.0886	0.0338	0.0467	0.0528	0.047	0.0509	0.035
Mg	0.1964	0.2631	0.1356	0.1921	0.268	0.2473	0.2886	0.2511	0.2837	0.1888	0.2509	0.2717	0.2944	0.2916	0.2956	0.2863	0.2747	0.2988	0.2946	0.2878	0.275	0.2903	0.2995	0.0062	0.0613	0.0631	0.054	0.057	0.1116	0.0512	0.0388	0.0582	0.0997	0.0796	0.0622	0.0786	0.0387	0.0317	0.0802	0.0869	0.1022	0.0988	0.0976	0.0722	0.1127	0.0773	0.0739
Ca	0.0157	0.0041	0.0099	0.0088	0.011	0.0063	0.0066	0.0093	0.0052	0.0097	0.006	0.0106	0.0062	0.0072	0.0056	0.006	0.0122	0.011	0.0034	0.0061	0.0082	0.0079	0.0046	0.0028	0	0	0	0	0	0	0	0.001	0.0006	0.0001	0	0	0	0.0017	0	0	0	0	0	0	0	0	0
Na	0	0	0	0.0041	0	0	0.004	0.0019	0	0	0.0013	0	0	0	0.0044	0.0025	0	0	0	0	0.0053	0	0	0	0	0	0	0	0.0003	0	0	0.002	0.0032	0	0.0007	0.0035	0	0	0.001	0	0	0	0.0046	0	0	0	0
K	0.0025	0.0012	0.0009	0.0028	0.0015	0.0016	0.0024	0.0038	0.0015	0.001	0.003	0.0021	0.0011	0	0.0006	0.0024	0.0012	0	0.0002	0.0023	0	0.0017	0.0014	0	0	0.0004	0.0006	0	0.0006	0	0	0	0	0.0004	0	0.0006	0.0023	0	0	0.0005	0	0	0.0012	0.0003	0	0.001	0
Ni	0.0006	0.0013	0	0	0.0019	0.0001	0.0017	0.001	0.0002	0.0012	0.0022	0	0.0016	0.0011	0.0013	0.0004	0.0008	0.0009	0	0.0007	0.0018	0.0021	0.001	0.0007	0.002	0	0	0	0.0021	0.0019	0	0.0001	0.0008	0.0002	0	0	0.0001	0	0.001	0	0	0.0014	0.0018	0.0008	0.0016	0	0
Total	3	3	3	3	3	3	3	3	3	3	3	3	3	3	3	3	3	3	3	3	3	3	3	3	3	3	3	3	3	3	3	3	3	3	3	3	3	3	3	3	3	3	3	3	3	3	3
X	42.946	45.618	46.226	46.238	46.328	39.46	39.431	39.399	32.819	34.852	35.121	35.131	35.601	34.302	33.208	33.815	38.584	38.638	38.389	38.344	37.51	37.499	38.095	69.645	68.804	69.707	70.318	69.006	68.663	63.507	62.994	63.298	63.226	62.302	61.971	60.714	60.367	59.321	60.355	60.415	60.197	55.584	56.428	57.898	68.608	69.592	62.932
Y	66.86	64.941	65.154	65.22	65.205	47.498	47.514	47.512	49.551	49.332	50.466	50.321	51.89	59.671	61.309	62.141	55.313	55.472	58.423	58.496	59.201	59.143	65.049	45.126	45.727	46.018	57.438	57.723	62.561	63.015	64.083	65.284	66.771	67.499	67.825	69.443	71.968	70.321	67.924	67.802	66.135	64.878	64.405	62.485	62.558	61.564	51.386
