# Supplementary material for: The Petrology & Geochemistry of REE-Enriched, Alkaline Vol-Canic Rocks of Ambitle Island, Feni Island Group, Papua New Guinea
Source: Preprints.org preprint supplement (doi:10.20944/preprints202306.0971.v1), 2023-06-14
Supplement: Supplementary file 18 [file ems05.xlsx]

## Sheet: ems05
Generated from ems05.TXT by VB Plum system Version 1.09 on 13/12/2010 at 11:54:55								15 kV	30 nA	10 μm
	1	2	3	4	5	6	7	8	9	10	11	12	13	14	15	16	17	18	19	20	21	22	23	24	25	26	27	28	29	30	31	32	33	34	35	36	37	38	39	40	41	42	43	44	45	46	47	48	49
	++++	++++	++++	++++	++++	++++	++++	++++	++++	++++	++++	++++	++++	++++	++++	++++	++++	++++	++++	++++	++++	++++	++++	++++	++++	++++	++++	++++	++++	++++	++++	++++	++++	++++	++++	++++	++++	++++	++++	++++	++++	++++	++++	++++	++++	++++	++++	++++	++++
SiO2	40.516	41.26	39.997	0	0	56.344	57.94	57.325	40.737	40.302	40.958	56.66	58.338	54.169	0	64.55	41.501	40.239	0.038	42.749	58.702	58.407	60.296	0.135	54.839	0.201	56.884	41.141	0.224	0.336	49.24	41.799	39.074	41.587	41.247	59.735	58.905	58.627	59.46	53.046	43.911	41.233	41.895	0.015	41.971	41.983	41.831	0.092	41.03
TiO2	1.883	1.962	1.933	0.023	3.81	0	0.009	0.02	2.344	2.091	2.331	0.001	0	0	4.421	0.079	1.947	2.185	4.119	1.343	0.049	0.01	0	0	0	1.596	0	2.077	0	0	0.617	1.858	1.939	2.189	1.851	0.049	0.102	0.022	0.025	0.248	1.476	1.443	1.502	2.304	1.569	1.517	1.805	3.685	1.62
Al2O3	13.14	12.833	13.409	0	2.494	26.633	25.308	26.107	12.424	13.117	12.368	27.127	25.904	28.455	2.094	19.314	12.509	12.568	2.727	13.049	25.812	26.08	25.181	0	22.388	1.077	27.925	12.854	0	0	5.088	13.469	12.079	12.723	13.282	26.262	25.573	25.376	25.35	2.402	14.333	13.594	12.104	1.075	12.885	13.462	12.294	3.738	12.421
Cr2O3	0	0	0.005	0	0.014	0	0.018	0.031	0	0	0.039	0.017	0.016	0.011	0	0	0.014	0	0.005	0	0	0.007	0	0	0	0.012	0.043	0	0.014	0	0	0	0	0	0.019	0.028	0.027	0.037	0.055	0.035	0.019	0.038	0.049	0.373	0.002	0.049	0	0.071	0.047
FeO	11.361	10.729	12.442	0	83.249	0.389	0.417	0.332	13.483	13.329	13.059	0.487	0.403	0.524	84.549	0.373	12.209	13.268	84.663	12.088	0.386	0.352	0.338	27.005	0.347	81.988	0.394	13.314	0.287	0.243	8.235	12.235	10.85	13.364	12.611	0.387	0.414	0.457	0.426	7.067	6.447	6.404	6.054	48.065	6.123	7.14	7.488	53.926	7.501
MnO	0.217	0.146	0.154	0	1.272	0.001	0.004	0.024	0.334	0.311	0.301	0.008	0.004	0.015	1.259	0.053	0.196	0.34	1.213	0.233	0.039	0.024	0	16.535	0.001	1.891	0.038	0.299	0.116	0.098	0.164	0.199	0.111	0.299	0.2	0	0.009	0	0	0.343	0.1	0.082	0.113	0.718	0.056	0.104	0.188	0.618	0.043
MgO	13.859	14.588	13.293	0.003	1.552	0.016	0.015	0.039	12.645	12.688	12.924	0.013	0.027	0.017	1.303	0	13.659	12.487	1.694	14.313	0.021	0	0	1.459	0	0.312	0.018	12.443	0.12	0.114	13.071	13.671	13.544	12.574	13.68	0	0	0.002	0	13.941	14.179	13.471	14.134	0.727	14.247	13.289	12.308	1.653	15.221
CaO	11.92	11.989	11.85	0.005	0	8.753	7.522	8.271	11.67	11.834	11.756	8.986	7.691	10.655	0.008	0.218	11.687	11.382	0	11.257	7.223	7.563	6.344	6.945	5.891	0.105	9.245	11.718	52.776	52.07	22.85	11.548	11.19	11.263	11.463	7.263	7.054	6.655	6.667	21.236	9.842	9.409	9.145	0	9.463	9.555	9.125	0	10.077
Na2O	2.578	2.372	2.878	0.011	0.03	5.777	6.431	6.082	2.689	2.808	2.7	5.761	6.568	4.804	0	2.301	2.699	2.568	0.008	2.865	6.46	6.086	6.563	0.003	6.626	0.079	5.395	2.579	0.051	0.006	0.512	2.625	2.773	2.626	2.745	6.327	6.422	6.439	6.291	0.641	2.025	2.013	2.362	0	2.052	2.169	2.121	0.062	2.161
K2O	1.265	1.305	1.238	0.005	0	0.644	0.701	0.711	1.54	1.381	1.509	0.588	0.749	0.403	0	13.29	1.325	1.33	0.012	1.23	0.673	0.664	0.948	0.047	0.912	0.053	0.492	1.441	0	0.019	0	1.215	1.192	1.477	1.324	0.743	0.731	0.827	0.83	0	1.028	1.03	1.124	0.034	1.098	1.101	1.222	0.004	1.26
NiO	0.016	0	0	0.003	0	0.041	0.018	0.022	0	0	0.011	0	0.011	0	0	0	0	0.004	0	0.065	0.017	0	0	0.027	0	0	0	0	0.029	0.01	0.016	0	0	0.056	0.011	0.011	0.011	0.02	0	0	0.044	0.034	0.046	0.002	0.039	0.018	0	0.014	0
Total	96.755	97.184	97.199	0.05	92.421	98.598	98.383	98.964	97.866	97.861	97.956	99.648	99.711	99.053	93.634	100.178	97.746	96.371	94.479	99.192	99.382	99.193	99.67	52.156	91.004	87.314	100.434	97.866	53.617	52.896	99.793	98.619	92.752	98.158	98.433	100.805	99.248	98.462	99.104	98.959	93.404	88.751	88.528	53.313	89.505	90.387	88.382	63.863	91.381
O	10	10	10	10	10	10	10	10	10	10	10	10	10	10	10	10	10	10	10	10	10	10	10	10	10	10	10	10	10	10	10	10	10	10	10	10	10	10	10	10	10	10	10	10	10	10	10	10	10
Si	2.6389	2.6622	2.61	0	0	3.2096	3.296	3.2486	2.6544	2.6247	2.6602	3.1952	3.278	3.0871	0	3.6956	2.6812	2.6557	0.0044	2.7072	3.2988	3.287	3.3655	0.029	3.367	0.0266	3.1773	2.6707	0.0389	0.059	3.0793	2.6678	2.6542	2.6876	2.6493	3.3052	3.3126	3.3217	3.341	3.2925	2.829	2.8061	2.8582	0.0031	2.8291	2.817	2.8751	0.0152	2.7498
Ti	0.0922	0.0952	0.0949	2.8501	0.3444	0	0.0004	0.0009	0.1149	0.1024	0.1139	0	0	0	0.3954	0.0034	0.0946	0.1085	0.3624	0.064	0.0021	0.0004	0	0	0	0.1588	0	0.1014	0	0	0.029	0.0892	0.0991	0.1064	0.0894	0.002	0.0043	0.0009	0.0011	0.0116	0.0715	0.0739	0.0771	0.3629	0.0795	0.0766	0.0933	0.4575	0.0817
Al	1.0088	0.976	1.0314	0	0.3533	1.7882	1.6969	1.7439	0.9542	1.0069	0.9469	1.8032	1.7156	1.9114	0.2936	1.3034	0.9526	0.9777	0.3761	0.974	1.7098	1.73	1.6567	0	1.6202	0.168	1.8385	0.9835	0	0	0.375	1.0133	0.9671	0.9692	1.0056	1.7128	1.6951	1.6947	1.6789	0.1757	1.0884	1.0905	0.9733	0.2654	1.0237	1.0647	0.996	0.7273	0.9812
Cr	0	0	0.0003	0	0.0013	0	0.0008	0.0014	0	0	0.002	0.0008	0.0007	0.0005	0	0	0.0007	0	0.0005	0	0	0.0003	0	0	0	0.0013	0.0019	0	0.0019	0	0	0	0	0	0.001	0.0012	0.0012	0.0017	0.0024	0.0017	0.001	0.002	0.0026	0.0618	0.0001	0.0026	0	0.0093	0.0025
Fe2	0.6189	0.579	0.679	0	8.3682	0.0185	0.0198	0.0157	0.7348	0.726	0.7094	0.023	0.0189	0.025	8.4099	0.0179	0.6597	0.7323	8.284	0.6402	0.0181	0.0166	0.0158	4.8536	0.0178	9.0724	0.0184	0.7228	0.0417	0.0357	0.4307	0.6531	0.6164	0.7223	0.6774	0.0179	0.0195	0.0217	0.02	0.3668	0.3474	0.3645	0.3454	8.4181	0.3452	0.4007	0.4304	7.4445	0.4204
Mn	0.012	0.008	0.0085	0	0.1295	0	0.0002	0.0012	0.0184	0.0172	0.0166	0.0004	0.0002	0.0007	0.1268	0.0026	0.0107	0.019	0.1202	0.0125	0.0019	0.0011	0	3.01	0.0001	0.2119	0.0018	0.0164	0.0171	0.0146	0.0087	0.0108	0.0064	0.0164	0.0109	0	0.0004	0	0	0.018	0.0055	0.0047	0.0065	0.1274	0.0032	0.0059	0.0109	0.0864	0.0024
Mg	1.3456	1.4032	1.2931	0.7369	0.2781	0.0014	0.0013	0.0033	1.2283	1.2318	1.2513	0.0011	0.0023	0.0014	0.231	0	1.3155	1.2285	0.2954	1.3512	0.0018	0	0	0.4674	0	0.0615	0.0015	1.2041	0.0311	0.0298	1.2185	1.3007	1.3714	1.2113	1.3098	0	0	0.0002	0	1.2899	1.3617	1.3666	1.4374	0.227	1.4316	1.3292	1.261	0.4067	1.5207
Ca	0.8319	0.8289	0.8286	0.8827	0	0.5343	0.4585	0.5022	0.8148	0.8258	0.8182	0.543	0.4631	0.6507	0.001	0.0134	0.809	0.8049	0	0.7639	0.4349	0.4561	0.3794	1.5992	0.3876	0.0149	0.5533	0.8151	9.8169	9.7973	1.5311	0.7897	0.8144	0.7799	0.7889	0.4306	0.4251	0.404	0.4014	1.4123	0.6794	0.6861	0.6685	0	0.6835	0.687	0.672	0	0.7237
Na	0.3256	0.2968	0.3642	3.5143	0.007	0.6381	0.7094	0.6683	0.3397	0.3546	0.34	0.63	0.7156	0.5309	0	0.2554	0.3381	0.3286	0.0018	0.3518	0.7039	0.6641	0.7103	0.0013	0.7888	0.0203	0.5843	0.3246	0.0172	0.002	0.0621	0.3249	0.3652	0.3291	0.3419	0.6788	0.7003	0.7074	0.6854	0.0771	0.253	0.2656	0.3125	0	0.2682	0.2822	0.2827	0.0198	0.2808
K	0.1051	0.1074	0.1031	1.051	0	0.0468	0.0509	0.0514	0.128	0.1147	0.125	0.0423	0.0537	0.0293	0	0.9707	0.1092	0.112	0.0018	0.0994	0.0483	0.0477	0.0675	0.0129	0.0714	0.0089	0.0351	0.1193	0	0.0043	0	0.0989	0.1033	0.1218	0.1085	0.0524	0.0524	0.0598	0.0595	0	0.0845	0.0894	0.0978	0.0091	0.0944	0.0943	0.1072	0.0008	0.1077
Ni	0.0008	0	0	0.3976	0	0.0019	0.0008	0.001	0	0	0.0006	0	0.0005	0	0	0	0	0.0002	0	0.0033	0.0008	0	0	0.0047	0	0	0	0	0.004	0.0014	0.0008	0	0	0.0029	0.0006	0.0005	0.0005	0.0009	0	0	0.0023	0.0019	0.0025	0.0003	0.0021	0.001	0	0.0019	0
Total	6.9798	6.9566	7.0129	9.4326	9.4818	6.2388	6.2349	6.2378	6.9875	7.0041	6.984	6.2389	6.2485	6.237	9.4578	6.2624	6.9712	6.9673	9.4467	6.9674	6.2203	6.2033	6.1951	9.9781	6.253	9.7446	6.2121	6.9581	9.9687	9.9441	6.7352	6.9483	6.9975	6.9469	6.9832	6.2014	6.2113	6.2128	6.1897	6.6458	6.7236	6.7513	6.7819	9.475	6.7607	6.761	6.7286	9.1694	6.8709
O	10	10	10	10	10	10	10	10	10	10	10	10	10	10	10	10	10	10	10	10	10	10	10	10	10	10	10	10	10	10	10	10	10	10	10	10	10	10	10	10	10	10	10	10	10	10	10	10	10
Si	2.6389	2.6622	2.61	0	0	3.2096	3.296	3.2486	2.6544	2.6247	2.6602	3.1952	3.278	3.0871	0	3.6956	2.6812	2.6557	0.0044	2.7072	3.2988	3.287	3.3655	0.029	3.367	0.0266	3.1773	2.6707	0.0389	0.059	3.0793	2.6678	2.6542	2.6876	2.6493	3.3052	3.3126	3.3217	3.341	3.2925	2.829	2.8061	2.8582	0.0031	2.8291	2.817	2.8751	0.0152	2.7498
Ti	0.0922	0.0952	0.0949	2.8501	0.3444	0	0.0004	0.0009	0.1149	0.1024	0.1139	0	0	0	0.3954	0.0034	0.0946	0.1085	0.3624	0.064	0.0021	0.0004	0	0	0	0.1588	0	0.1014	0	0	0.029	0.0892	0.0991	0.1064	0.0894	0.002	0.0043	0.0009	0.0011	0.0116	0.0715	0.0739	0.0771	0.3629	0.0795	0.0766	0.0933	0.4575	0.0817
Al	1.0088	0.976	1.0314	0	0.3533	1.7882	1.6969	1.7439	0.9542	1.0069	0.9469	1.8032	1.7156	1.9114	0.2936	1.3034	0.9526	0.9777	0.3761	0.974	1.7098	1.73	1.6567	0	1.6202	0.168	1.8385	0.9835	0	0	0.375	1.0133	0.9671	0.9692	1.0056	1.7128	1.6951	1.6947	1.6789	0.1757	1.0884	1.0905	0.9733	0.2654	1.0237	1.0647	0.996	0.7273	0.9812
Cr	0	0	0.0003	0	0.0013	0	0.0008	0.0014	0	0	0.002	0.0008	0.0007	0.0005	0	0	0.0007	0	0.0005	0	0	0.0003	0	0	0	0.0013	0.0019	0	0.0019	0	0	0	0	0	0.001	0.0012	0.0012	0.0017	0.0024	0.0017	0.001	0.002	0.0026	0.0618	0.0001	0.0026	0	0.0093	0.0025
Fe2	0.6189	0.579	0.679	0	8.3682	0.0185	0.0198	0.0157	0.7348	0.726	0.7094	0.023	0.0189	0.025	8.4099	0.0179	0.6597	0.7323	8.284	0.6402	0.0181	0.0166	0.0158	4.8536	0.0178	9.0724	0.0184	0.7228	0.0417	0.0357	0.4307	0.6531	0.6164	0.7223	0.6774	0.0179	0.0195	0.0217	0.02	0.3668	0.3474	0.3645	0.3454	8.4181	0.3452	0.4007	0.4304	7.4445	0.4204
Mn	0.012	0.008	0.0085	0	0.1295	0	0.0002	0.0012	0.0184	0.0172	0.0166	0.0004	0.0002	0.0007	0.1268	0.0026	0.0107	0.019	0.1202	0.0125	0.0019	0.0011	0	3.01	0.0001	0.2119	0.0018	0.0164	0.0171	0.0146	0.0087	0.0108	0.0064	0.0164	0.0109	0	0.0004	0	0	0.018	0.0055	0.0047	0.0065	0.1274	0.0032	0.0059	0.0109	0.0864	0.0024
Mg	1.3456	1.4032	1.2931	0.7369	0.2781	0.0014	0.0013	0.0033	1.2283	1.2318	1.2513	0.0011	0.0023	0.0014	0.231	0	1.3155	1.2285	0.2954	1.3512	0.0018	0	0	0.4674	0	0.0615	0.0015	1.2041	0.0311	0.0298	1.2185	1.3007	1.3714	1.2113	1.3098	0	0	0.0002	0	1.2899	1.3617	1.3666	1.4374	0.227	1.4316	1.3292	1.261	0.4067	1.5207
Ca	0.8319	0.8289	0.8286	0.8827	0	0.5343	0.4585	0.5022	0.8148	0.8258	0.8182	0.543	0.4631	0.6507	0.001	0.0134	0.809	0.8049	0	0.7639	0.4349	0.4561	0.3794	1.5992	0.3876	0.0149	0.5533	0.8151	9.8169	9.7973	1.5311	0.7897	0.8144	0.7799	0.7889	0.4306	0.4251	0.404	0.4014	1.4123	0.6794	0.6861	0.6685	0	0.6835	0.687	0.672	0	0.7237
Na	0.3256	0.2968	0.3642	3.5143	0.007	0.6381	0.7094	0.6683	0.3397	0.3546	0.34	0.63	0.7156	0.5309	0	0.2554	0.3381	0.3286	0.0018	0.3518	0.7039	0.6641	0.7103	0.0013	0.7888	0.0203	0.5843	0.3246	0.0172	0.002	0.0621	0.3249	0.3652	0.3291	0.3419	0.6788	0.7003	0.7074	0.6854	0.0771	0.253	0.2656	0.3125	0	0.2682	0.2822	0.2827	0.0198	0.2808
K	0.1051	0.1074	0.1031	1.051	0	0.0468	0.0509	0.0514	0.128	0.1147	0.125	0.0423	0.0537	0.0293	0	0.9707	0.1092	0.112	0.0018	0.0994	0.0483	0.0477	0.0675	0.0129	0.0714	0.0089	0.0351	0.1193	0	0.0043	0	0.0989	0.1033	0.1218	0.1085	0.0524	0.0524	0.0598	0.0595	0	0.0845	0.0894	0.0978	0.0091	0.0944	0.0943	0.1072	0.0008	0.1077
Ni	0.0008	0	0	0.3976	0	0.0019	0.0008	0.001	0	0	0.0006	0	0.0005	0	0	0	0	0.0002	0	0.0033	0.0008	0	0	0.0047	0	0	0	0	0.004	0.0014	0.0008	0	0	0.0029	0.0006	0.0005	0.0005	0.0009	0	0	0.0023	0.0019	0.0025	0.0003	0.0021	0.001	0	0.0019	0
Total	6.9798	6.9566	7.0129	9.4326	9.4818	6.2388	6.2349	6.2378	6.9875	7.0041	6.984	6.2389	6.2485	6.237	9.4578	6.2624	6.9712	6.9673	9.4467	6.9674	6.2203	6.2033	6.1951	9.9781	6.253	9.7446	6.2121	6.9581	9.9687	9.9441	6.7352	6.9483	6.9975	6.9469	6.9832	6.2014	6.2113	6.2128	6.1897	6.6458	6.7236	6.7513	6.7819	9.475	6.7607	6.761	6.7286	9.1694	6.8709
X	79.341	79.248	76.379	75.2	75.165	76.594	76.675	76.7	76.954	77.312	77.2	77.967	78.127	78.138	77.776	78.058	78.106	77.988	77.585	79.981	79.57	63.398	63.961	64.188	65.152	67.437	68.019	67.771	67.859	67.868	68.14	64.153	64.576	64.043	63.803	62.859	62.446	62.043	62.043	62.117	68.948	68.948	69.278	69.406	69.559	68.457	68.404	73.461	73.793
Y	77.042	77.573	75.474	7	76.278	77.995	79.749	76.071	72.697	72.755	72.686	70.819	70.959	70.036	71	68.532	68.527	68.4	68.753	63.006	62.643	73.856	71.491	71.576	71.476	70.967	70.793	67.393	67.153	66.88	66.547	64.86	64.428	62.936	62.857	61.004	60.836	60.85	60.85	60.508	44.758	44.758	44.811	44.735	45.25	45.23	44.989	45.974	47.168
Z	10.967	10.967	10.988	10.988	10.988	10.988	10.988	10.988	10.994	10.994	10.994	10.994	10.994	10.994	10.994	10.994	10.994	10.994	10.994	10.998	10.998	10.998	10.998	10.998	10.998	10.998	10.998	11.037	11.044	11.044	11.044	11.044	11.044	11.044	11.044	11.044	11.044	11.044	11.044	11.044	11.044	11.044	11.044	11.044	11.044	11.044	11.044	11.044	11.044
CH1	CH2	CH3		Counting time
				Peak	-ve bg	+bg
Na	K	Fe		2 x 10	2 x 5	2 x 5
Mg	Ti	Mn		2 x 10	2 x 5	2 x 5
Al	Ca	Ni		2 x 10	2 x 5	2 x 5
Si		Cr		2 x 10	2 x 5	2 x 5
[truncated: 79 more columns]
