# Supplementary material for: The Petrology & Geochemistry of REE-Enriched, Alkaline Vol-Canic Rocks of Ambitle Island, Feni Island Group, Papua New Guinea
Source: Preprints.org preprint supplement (doi:10.20944/preprints202306.0971.v1), 2023-06-14
Supplement: Supplementary file 19 [file normalization.v15 (1).xls]

## Sheet: El wt% to oxide wt%
Changing from element wt% to oxide wt%
Sample calculation below is shown for a labradorite
Replace numbers in red with your analysis (element wt %) to convert to oxide wt %.
Only include Si, Ti, Al, Mn, Mg, Ca, Na, K -- the other elements are not accurate enough to be meaningful.
Oxide wt % values appear in blue; cut and copy them into the appropriate mineral normalization spread sheet.
When you paste, use the Paste Special>Values option.
Analysis	analysis	B	C					normlalized
	analysis	elem	oxide	# cations	# oxygen	oxide	oxide	oxide
oxide	wt %	at wt	at wt	in oxide	in oxide	wt %		wt %
Si	37.444	28.0855	60.0843	1	2	80.1053	SiO2	52.2081
Ti	0	47.9	79.8988	1	2	0	TiO2	0
Al	12.015	26.9815	101.961	2	3	22.7019	Al2O3	14.7958
Fe	10.007	51.847	71.8464	1	1	13.8671	FeO	9.03779
Mn	0.76	54.938	70.9374	1	1	0.981332	MnO	0.639577
Mg	20.566	24.305	40.3044	1	1	34.1041	MgO	22.2272
Ca	0.924	40.08	56.0794	1	1	1.29285	CaO	0.842606
Na	0.059	22.9898	61.9789	2	1	0.0795301	Na2O	0.0518333
K	0.251	39.0983	94.196	2	1	0.302356	K2O	0.197059
total	82.026					153.434		100
ideal						100

## Sheet: Plagioclase
Recalculation of a feldspar anlaysis (all Fe as FeO) and solving for Fe+3
Sample calculation below is shown for a labradorite
Replace numbers in red with your analysis to normalize your sample.
Do not include a value for Fe2O3 (in blue) unless it was determined by analysis.
If you omit a value for Fe2O3, it will be calculated, if possible, from charge balance.
Analysis
	analysis	mole	mole	norm.	norm.	atom	norm
oxide	wt %	cations	oxygen	cations	oxygen	units	oxygen
SiO2	61.2802	1.0199	2.03981	2.2583	4.5166	2.2583	4.5166
TiO2	0	0	0	0	0	0	0
Al2O3	28.3823	0.556726	0.83509	1.23272	1.84908	1.23272	1.84908
Cr2O3	0	0	0	0	0	0	0
Fe2O3	30.32	0.379731	0.569596	0.840811	1.26122	0.840811	1.26122
FeO	0.202263	0.00281522	0.00281522	0.00623354	0.00623354	0.00623354	0.00623354
MnO	0	0	0	0	0	0	0
MgO	0.0792299	0.00196579	0.00196579	0.00435271	0.00435271	0.00435271	0.00435271
CaO	2.38754	0.0425742	0.0425742	0.0942691	0.0942691	0.0942691	0.0942691
BaO	0	0	0	0	0	0	0
Na2O	7.20049	0.232353	0.116176	0.514483	0.257241	0.514483	0.257241
K2O	0.468023	0.00993721	0.00496861	0.0220033	0.0110016	0.0220033	0.0110016
total	130.32	2.24601	3.61299	4.97318	8	4.97318	8
ideal						5	8
calculated charge		7.22599	-7.22599	16	-16	16	-16
Results of normalization are given in the box, below. If some Fe was calculated to
be Fe3+, the total for the analysis will inrease.
Normalized Analysis
						end	mole
oxide	wt %		cations	atoms		member	%
SiO2	61.2802		Si	2.2583		An	14.9454
TiO2	0		Ti	0		Ab	81.5662
Al2O3	28.3823		Al	1.23272		Or	3.4884
Cr2O3	0		Cr	0
Fe2O3	30.32		Fe3	0.840811		*based on Ca,
FeO	0.202263		Fe2	0.00623354		Na, K ratios only
MnO	0		Mn	0
MgO	0.0792299		Mg	0.00435271		Si+Ti+Al+Fe3=	4.33183
CaO	2.38754		Ca	0.0942691		ideal =	4
BaO	0		Ba	0
Na2O	7.20049		Na	0.514483		Ca+Na+K=	0.630755
K2O	0.468023		K	0.0220033		ideal =	1
			tot. cat.	4.97318	Note: excess tetrahedral cations
total	130.32		tot. oxy.	8

## Sheet: Pyroxene
Recalculation of a pyroxene anlaysis (all Fe as FeO) and solving for Fe+3
Sample calculation below is shown for a clinopyroxene from a lherzolite.
Replace numbers in red with your analysis to normalize your sample.
Do not include a value for Fe2O3 unless it was determined by analysis.
If you omit a value for Fe2O3, it will be calculated, if possible, from charge balance.
Analysis
	analysis	mole	mole	norm.	norm.	atom	norm
oxide	wt %	cations	oxygen	cations	oxygen	units	oxygen
SiO2	52.2081	0.868915	1.73783	1.8665	3.733	1.8665	3.733
TiO2	0	0	0	0	0	0	0
Al2O3	14.7958	0.290225	0.435337	0.623425	0.935138	0.623425	0.935138
Cr2O3		0	0	0	0	0	0
Fe2O3		0	0	0	0	0	0
FeO	9.03779	0.125793	0.125793	0.270214	0.270214	0.270214	0.270214
MnO	0.639577	0.00901608	0.00901608	0.0193673	0.0193673	0.0193673	0.0193673
MgO	22.2272	0.551482	0.551482	1.18463	1.18463	1.18463	1.18463
CaO	0.842606	0.0150252	0.0150252	0.0322754	0.0322754	0.0322754	0.0322754
Na2O	0.0518333	0.00167261	0.000836305	0.0035929	0.00179645	0.0035929	0.00179645
	0
total	0	1.86213	2.87532	4	6.17641	4	6.17641
ideal						4	6
				Note: too much cation charge
calculated charge		5.75064	-5.75064	12.3528	-12.3528	12.3528	-12.3528
Results of normalization are given in the box, below. If some Fe was calculated to
be Fe3+, the total for the analysis will inrease.
End member %s are based on Ca, Mg, Fe-total ratios only.
Normalized Analysis
oxide	wt %		cations	atoms
SiO2	52.2081		Si	1.8665
TiO2	0		Ti	0
Al2O3	14.7958		Al	0.623425
Cr2O3	0		Cr	0
Fe2O3	0		Fe3	0
FeO	9.03779		Fe2	0.270214
MnO	0.639577		Mn	0.0193673
MgO	22.2272		Mg	1.18463
CaO	0.842606		Ca	0.0322754
Na2O	0.0518333		Na	0.0035929
			tot. cat.	4
total	99.8029		tot. oxy.	6.17641
Si, Al assigned to tetrahedral (T) site.
Ca,Na,Mn,Fe2+,Mg assigned to M2 octahedral site.
Fe3+,Ti,Al,Fe2+, Mg assigned to M1 octahedral site,
(Fe2+/Mg) assumed the same in M1 and M2
Site Occupancies & End Members
						end
	M2 (VI)	M1 (VI)	T (IV)			member*	%
Si			1.8665			XWo = Ca/Ca+Mg+FeT	2.17033
Ti		0				XEn = Mg/Ca+Mg+FeT	79.6593
Al		0.489923	0.133502			XFs = FeT/Ca+Mg+FeT	18.1703
Cr		0				total	100
Fe3		0
Fe2	0.175475	0.0947387				FeT/FeT+Mg	0.185734
Mn	0.0193673					Fe2/Fe2+Mg	0.185734
Mg	0.769289	0.415338
Ca	0.0322754
Na	0.0035929
sum	1	1	2
ideal	1	1	2

## Sheet: Garnet
Recalculation of a garnet anlaysis (all Fe as FeO) and solving for Fe+3
Sample calculation below is shown for a garnet from an Napak, Uganda
Replace numbers in red with your analysis to normalize your sample.
Do not include a value for Fe2O3 (in blue) unless it was determined by analysis.
If you omit a value for Fe2O3, it will be calculated, if possible, from charge balance.
Analysis
	analysis	mole	mole	norm.	norm.	atom	norm
oxide	wt %	cations	oxygen	cations	oxygen	units	oxygen
SiO2	37.39	0.622292	1.24458	2.99605	5.99211	2.99605	5.99211
TiO2	0.28	0.00350443	0.00700887	0.0168722	0.0337445	0.0168722	0.0337445
Al2O3	10.08	0.197722	0.296583	0.951942	1.42791	0.951942	1.42791
Cr2O3	0	0	0	0	0	0	0
Fe2O3	0	0	0	0	0	1.02221	1.53331
FeO	19.35	0.269325	0.269325	1.29667	1.29667	0.274467	0.274467
MnO	0.14	0.00197357	0.00197357	0.00950184	0.00950184	0.00950184	0.00950184
MgO	1.55	0.0384573	0.0384573	0.185155	0.185155	0.185155	0.185155
CaO	29.63	0.528358	0.528358	2.5438	2.5438	2.5438	2.5438
total	98.42	1.66163	2.38629	8	11.4889	8	12
ideal						8	12
calculated charge		4.77258	-4.77258	22.9778	-22.9778	24	-24
Results of normalization are given in the box, below. If some Fe was calculated to
be Fe3+, the total for the analysis will inrease.
Normalized Analysis
oxide	wt %		cations	atoms
SiO2	37.39		Si	2.99605
TiO2	0.28		Ti	0.0168722
Al2O3	10.08		Al	0.951942
Cr2O3	0		Cr	0
Fe2O3	16.9527		Fe3	1.02221
FeO	4.09581		Fe2	0.274467
MnO	0.14		Mn	0.00950184
MgO	1.55		Mg	0.185155
CaO	29.63		Ca	2.5438
							X(Fe)
			tot. cat.	8		FeT/FeT+Mg	0.87505
total	100.118		tot. oxy.	12		Fe2/Fe2+Mg	0.597159
Site Occupancies & End Members				end	mol %	mol %	mol %
	cubic	octahedral	tetrahedral	member	with	cation ratio	cation ratio
	8-fold	6-fold	4-fold		Fe3+, etc.	total Fe	Fe2+
Si			2.99605	almandine	9.10964	32.1346	9.10964
Ti		0.0168722		pyrope	6.14534	4.58856	6.14534
Al		0.951942		grossular	40.3673	63.0413	84.4296
Cr		0		spessartine	0.315369	0.235478	0.315369
Fe3		1.02221		uvarovite	0
Fe2	0.274467			andradite	43.3469
Mn	0.00950184			Ca-Ti Gt	0.715471
Mg	0.185155			total	100	100	100
Ca	2.5438
total	3.01293	1.99102	2.99605
ideal	3	2	3

## Sheet: Olivine
Recalculation of an olivine anlaysis (all Fe as FeO) and solving for Fe+3
Sample calculation below is shown for an olivine from a lherzolite.
Replace numbers in red with your analysis to normalize your sample.
Do not include a value for Fe2O3 (in blue) unless it was determined by analysis.
If you omit a value for Fe2O3, it will be calculated, if possible, from charge balance.
Analysis
	analysis	mole	mole	norm.	norm.	atom	norm
oxide	wt %	cations	oxygen	cations	oxygen	units	oxygen
SiO2	38.48	0.640434	1.28087	0.988384	1.97677	0.988384	1.97677
TiO2	0.01	0.000125158	0.000250317	0.000193157	0.000386315	0.000193157	0.000386315
Al2O3	0.13	0.00254999	0.00382498	0.00393541	0.00590311	0.00393541	0.00590311
Cr2O3	0	0	0	0	0	0	0
Fe2O3	0	0	0	0	0	0.0189104	0.0283656
FeO	20.99	0.292151	0.292151	0.450878	0.450878	0.431968	0.431968
MnO	0.33	0.00465199	0.00465199	0.00717944	0.00717944	0.00717944	0.00717944
MgO	40.45	1.00361	1.00361	1.54888	1.54888	1.54888	1.54888
CaO	0.02	0.000356637	0.000356637	0.0005504	0.0005504	0.0005504	0.0005504
total	100.41	1.94388	2.58571	3	3.99054	3	4
ideal						3	4
calculated charge		5.17143	-5.17143	7.98109	-7.98109	8	-8
Results of normalization are given in the box, below. If some Fe was calculated to
be Fe3+, the total for the analysis will inrease.
End member %s are based on Mn (Te), Mg (Fo), Fe-total (Fa), and Ca ratios only.
Normalized Analysis
						end	mole
oxide	wt %		cations	atoms		member	%*
SiO2	38.48		Si	0.988384		Te	0.357633
TiO2	0.01		Ti	0.000193157		Fo	77.1551
Al2O3	0.13		Al	0.00393541		Fa	22.4598
Cr2O3	0		Cr	0		Ca-Ol	0.0274173
Fe2O3	0.978371		Fe3	0.0189104
FeO	20.1097		Fe2	0.431968		sum	100
MnO	0.33		Mn	0.00717944
MgO	40.45		Mg	1.54888
CaO	0.02		Ca	0.0005504
			tot. cat.	3
total	100.508		tot. oxy.	4

## Sheet: Spinel
Recalculation of a spinel anlaysis (all Fe as FeO) and solving for Fe+3
Sample calculation below is shown for a spinel from the Adirondacks.
Replace numbers in red with your analysis to normalize your sample.
Do not include a value for Fe2O3 (in blue) unless it was determined by analysis.
If you omit a value for Fe2O3, it will be calculated, if possible, from charge balance.
Analysis
	analysis	mole	mole	norm.	norm.	atom	norm
oxide	wt %	cations	oxygen	cations	oxygen	units	oxygen
SiO2	0	0	0	0	0	0	0
TiO2	0.13	0.00162706	0.00325412	0.00243652	0.00487304	0.00243652	0.00487304
Al2O3	65.4	1.28284	1.92426	1.92105	2.88158	1.92105	2.88158
Cr2O3	0	0	0	0	0	0	0
Fe2O3	0	0	0	0	0	0.0740741	0.111111
FeO	11.92	0.165909	0.165909	0.248449	0.248449	0.174375	0.174375
MnO	0.1	0.00140969	0.00140969	0.00211102	0.00211102	0.00211102	0.00211102
MgO	22.23	0.551553	0.551553	0.82595	0.82595	0.82595	0.82595
total	99.78	2.00334	2.64639	3	3.96296	3	4
desired						3	4
calculated charge		5.29277	-5.29277	7.92593	-7.92593	8	-8
Results of normalization are given in the box, below. Because some Fe was calculated to
be Fe3+, the total for the analysis increased.
Normalized Analysis
oxide	wt %		cations	atoms
SiO2	0		Si	0
TiO2	0.13		Ti	0.00243652
Al2O3	65.4		Al	1.92105
Cr2O3	0		Cr	0
Fe2O3	3.9496		Fe3	0.0740741
FeO	8.3661		Fe2	0.174375
MnO	0.1		Mn	0.00211102
MgO	22.23		Mg	0.82595
			tot. cat.	3
total	100.176		tot. oxy.	4

## Sheet: Periodic Table
oxide	MolWt	cation	#cations	#oxygen	cation wt
SiO2	60.0843	Si	1	2	28.0855
TiO2	79.8988	Ti	1	2	47.9
Al2O3	101.961	Al	2	3	26.9815
Fe2O3	159.692	Fe3	2	3	51.847
Cr2O3	151.99	Cr	2	3	51.996
FeO	71.8464	Fe2	1	1	51.847
MnO	70.9374	Mn	1	1	54.938
MgO	40.3044	Mg	1	1	24.305
CaO	56.0794	Ca	1	1	40.08
BaO	153.329	Ba	1	1	137.77
Na2O	61.9789	Na	2	1	22.9898
K2O	94.196	K	2	1	39.0983
