# Supplementary material for: The Petrology & Geochemistry of REE-Enriched, Alkaline Vol-Canic Rocks of Ambitle Island, Feni Island Group, Papua New Guinea
Source: Preprints.org preprint supplement (doi:10.20944/preprints202306.0971.v1), 2023-06-14
Supplement: Supplementary file 20 [file op01.xlsx]

## Sheet: op01
Generated from op01.TXT by VB Plum system Version 1.09 on 19/03/2010 at 10:02:55								15 kV	30 nA	10 μm
	1	2	3	4	5	6	7	8	9	10	11	12	13	14	15	16	17	18	19	20	21	22	23	24	25	26
	ALB	ALB	ALB	ALB	ALB	ALB	ALB	ALB	ALB	ALB	ALB	ALB	ALB	ALB	ALB	ALB	ALB	ALB	ALB	ALB	ALB	ALB	ALB	ALB	ALB	ALB
SiO2	69.235	67.81	68.225	68.492	69.077	68.546	68.316	68.457	68.327	68.416	68.433	69.03	69.064	68.343	68.597	68.671	67.69	67.978	68.417	67.565	67.239	68.788	68.947	68.339	67.402	68.6
TiO2	0	0.005	0	0	0	0.011	0	0.016	0	0.037	0	0.015	0	0	0	0	0.031	0	0	0.076	0	0	0.012	0.033	0	0
Al2O3	19.078	19.279	19.448	19.248	19.027	19.158	18.773	19.023	19.051	18.914	19.151	18.906	18.866	19.036	19.282	19.213	19.098	19.404	18.839	19.204	19.066	19.32	19.104	18.752	18.979	19.116
Cr2O3	0	0	0	0.01	0	0.014	0	0	0.004	0.046	0	0	0	0.034	0.024	0.03	0.02	0.018	0.004	0.018	0.01	0	0	0	0.004	0.004
Fe2O3	0.389	0.398	0.376	0.386	0.445	0.373	0.448	0.492	0.297	0.353	0.287	0.36	0.115	0.384	0.412	0.339	0.384	0.296	0.364	0.364	0.342	0.339	0.238	0.405	0.158	0.315
MnO	0	0	0.021	0	0	0	0.009	0.013	0.003	0.011	0.013	0	0	0	0.004	0	0	0.04	0.036	0.018	0	0.016	0	0.01	0	0
MgO	0	0	0.009	0	0	0	0	0.106	0	0	0.004	0	0.002	0	0	0.031	0	0	0	0	0.013	0	0	0	0.013	0
CaO	0.183	0.414	0.342	0.263	0.176	0.278	0.168	0.207	0.28	0.204	0.314	0.185	0	0.298	0.291	0.316	0.329	0.399	0.039	0.269	0.376	0.254	0.058	0.355	0.375	0.277
Na2O	10.494	10.399	10.695	10.674	10.451	10.589	10.511	10.427	10.662	10.115	10.479	10.507	11.455	10.26	10.603	10.71	10.457	10.508	10.16	10.341	9.979	10.56	11.497	10.46	10.47	10.735
K2O	1.719	1.5	1.232	1.272	1.723	1.484	1.509	1.57	1.399	2.272	1.458	1.581	0.384	2.136	1.51	1.247	1.391	1.373	2.207	1.529	2.121	1.406	0.418	1.372	1.397	1.278
NiO	0	0	0.017	0.025	0.003	0	0.003	0	0.004	0	0	0	0.001	0	0.008	0.013	0.02	0	0.008	0.038	0.013	0	0.051	0.055	0	0
Total	101.099	99.806	100.365	100.369	100.903	100.451	99.737	100.311	100.027	100.367	100.14	100.585	99.888	100.491	100.731	100.571	99.42	100.017	100.074	99.422	99.159	100.683	100.324	99.78	98.798	100.325
O	32	32	32	32	32	32	32	32	32	32	32	32	32	32	32	32	32	32	32	32	32	32	32	32	32	32
Si	12.0338	11.9459	11.9414	11.9817	12.0317	11.9909	12.0333	11.9949	11.9995	12.0118	11.9997	12.0504	12.0788	11.987	11.9726	11.9881	11.9644	11.9427	12.0364	11.9475	11.9506	11.9933	12.0252	12.0296	11.9822	12.0037
Ti	0	0.0007	0	0	0	0.0014	0	0.0021	0	0.0049	0	0.002	0	0	0	0	0.0041	0	0	0.0101	0	0	0.0016	0.0043	0	0
Al	3.9086	4.0033	4.0123	3.9689	3.9064	3.9502	3.8975	3.9289	3.9437	3.9141	3.9581	3.8901	3.8892	3.9355	3.9668	3.9535	3.9788	4.0182	3.9066	4.0028	3.9942	3.9704	3.9274	3.8907	3.9768	3.9426
Cr	0	0	0	0.0014	0	0.0019	0	0	0.0006	0.0064	0	0	0	0.0047	0.0033	0.0041	0.0028	0.0025	0.0006	0.0025	0.0014	0	0	0	0.0006	0.0006
Fe3	0.0509	0.0528	0.0495	0.0508	0.0583	0.0491	0.0594	0.0649	0.0393	0.0466	0.0379	0.0474	0.0151	0.0506	0.0542	0.0446	0.051	0.0392	0.0482	0.0484	0.0457	0.0445	0.0312	0.0536	0.0212	0.0415
Mn	0	0	0.0031	0	0	0	0.0013	0.0019	0.0004	0.0016	0.0019	0	0	0	0.0006	0	0	0.0059	0.0053	0.0027	0	0.0024	0	0.0015	0	0
Mg	0	0	0.0023	0	0	0	0	0.0278	0	0	0.001	0	0.0005	0	0	0.008	0	0	0	0	0.0034	0	0	0	0.0034	0
Ca	0.0341	0.0781	0.0642	0.0492	0.0329	0.052	0.0317	0.0389	0.0526	0.0384	0.0591	0.0346	0	0.0559	0.0543	0.0592	0.0624	0.0751	0.0073	0.0509	0.0716	0.0474	0.0108	0.067	0.0715	0.0519
Na	3.5368	3.5521	3.6298	3.6208	3.5298	3.5917	3.59	3.5424	3.6309	3.4435	3.563	3.5566	3.8848	3.4895	3.5882	3.6254	3.584	3.5796	3.4658	3.5457	3.439	3.57	3.8882	3.5704	3.6092	3.6423
K	0.3813	0.3372	0.2751	0.2838	0.383	0.3311	0.3392	0.351	0.3134	0.5088	0.3261	0.3521	0.0857	0.478	0.3363	0.2777	0.3137	0.3078	0.4953	0.345	0.481	0.3127	0.093	0.3081	0.3168	0.2852
Ni	0	0	0.0024	0.0035	0.0004	0	0.0004	0	0.0006	0	0	0	0.0001	0	0.0011	0.0018	0.0028	0	0.0011	0.0054	0.0018	0	0.0071	0.0077	0	0
Total	19.9455	19.9701	19.9801	19.9601	19.9424	19.9684	19.9529	19.9528	19.9809	19.976	19.9469	19.9332	19.9543	20.0013	19.9775	19.9624	19.9641	19.9711	19.9666	19.9609	19.9888	19.9406	19.9845	19.9331	19.9816	19.9677
X	43.141	43.214	42.715	42.675	42.417	42.502	41.695	41.944	42.442	42.307	41.917	41.832	41.44	41.748	42.188	42.942	43.237	43.933	32.44	32.441	32.733	32.921	31.783	32.325	32.595	32.873
Y	73.858	74.676	74.787	74.991	75.977	75.798	73.499	73.659	73.932	74.066	74.648	75.218	73.586	73.781	74.1	75.107	75.505	76.027	80.455	79.772	79.352	78.545	79.082	79.133	79.298	79.443
CH1	CH2	CH3		Counting time
				Peak	-ve bg	+bg
Na	K	Fe		2 x 10	2 x 5	2 x 5
Mg	Ca	Mn		2 x 10	2 x 5	2 x 5
Al	Ti	Ni		2 x 10	2 x 5	2 x 5
Si		Cr		2 x 10	2 x 5	2 x 5
				2 x 10	2 x 5	2 x 5
