# Supplementary material for: The Petrology & Geochemistry of REE-Enriched, Alkaline Vol-Canic Rocks of Ambitle Island, Feni Island Group, Papua New Guinea
Source: Preprints.org preprint supplement (doi:10.20944/preprints202306.0971.v1), 2023-06-14
Supplement: Supplementary file 21 [file op03.xlsx]

## Sheet: op03
Generated from op03.TXT by VB Plum system Version 1.09 on 01/04/2010 at 22:12:52								15 kV	30 nA	10 μm
OBO
	1	2	3	4	5	6	7	8	9	10	11	12	13	14	15
	BIO	KFSP	ALB	?	BIO	?	BIO	AP	AP	QTZ	?	?	QTZ +	?	?
SiO2	38.568	63.44	67.536	30.374	38.438	4.229	40.653	0	0	98.587	89.16	0.14	88.03	16.383	54.744
TiO2	2.889	0.012	0.007	0.25	2.072	0.04	2.376	0	0	0.018	0	0	0.036	0	0
Al2O3	11.405	17.916	19.176	8.977	11.262	1.343	11.459	0	0	0	0.213	0.015	3.687	1.59	2.207
Cr2O3	0.029	0.026	0	0	0.05	0	0.073	0.004	0.045	0	0.018	0.026	0.014	0.03	0.029
FeO	12.863	0	0.067	2.47	13.489	53.814	12.717	0.115	0.097	0.048	0.11	59.783	0.692	20.304	4.527
MnO	0.151	0.012	0	0.023	0.182	0	0.212	0.082	0.087	0	0.006	0	0	0	0
MgO	18.027	0	0	1.472	18.019	0	18.978	0.046	0.042	0.001	0	0	0.543	0	0
CaO	0	0	0.022	0.03	0.023	0	0.007	52.67	52.921	0.019	0	0.076	0.04	0	0.002
Na2O	0.819	0.505	12.459	3.148	1.136	0.25	0.712	0.262	0.095	0.034	0.183	0	0.32	0.306	0.542
K2O	9.476	17.263	0.163	8.037	8.667	1.081	8.671	0	0	0	0.33	0.012	0.671	0.212	0.478
NiO	0.022	0	0	0.02	0.002	0.034	0.001	0.042	0	0.035	0	0.035	0.017	0.041	0.018
Total	94.249	99.174	99.43	54.801	93.34	60.791	95.859	53.221	53.287	98.742	90.02	60.087	94.05	38.866	62.547
O	10	10	10	10	10	10	10	10	10	10	10	10	10	10	10
Si	2.6363	3.7292	3.7261	3.3937	2.6524	0.7438	2.7001	0	0	4.9962	4.9754	0.0277	4.7627	3.0877	4.6371
Ti	0.1485	0.0005	0.0003	0.021	0.1075	0.0053	0.1187	0	0	0.0007	0	0	0.0015	0	0
Al	0.9189	1.2414	1.2471	1.1822	0.916	0.2784	0.8971	0	0	0	0.014	0.0035	0.2351	0.3532	0.2203
Cr	0.0016	0.0012	0	0	0.0027	0	0.0038	0.0006	0.0062	0	0.0008	0.0041	0.0006	0.0045	0.0019
Fe2	0.7353	0	0.0031	0.2308	0.7785	7.9155	0.7064	0.0169	0.0142	0.002	0.0051	9.9099	0.0313	3.2004	0.3207
Mn	0.0087	0.0006	0	0.0022	0.0106	0	0.0119	0.0122	0.0129	0	0.0003	0	0	0	0
Mg	1.8369	0	0	0.2452	1.8535	0	1.879	0.012	0.011	0.0001	0	0	0.0438	0	0
Ca	0	0	0.0013	0.0036	0.0017	0	0.0005	9.9075	9.9364	0.001	0	0.0161	0.0023	0	0.0002
Na	0.1086	0.0576	1.3329	0.682	0.152	0.0853	0.0917	0.0892	0.0323	0.0033	0.0198	0	0.0336	0.1118	0.089
K	0.8264	1.2946	0.0115	1.1456	0.763	0.2426	0.7347	0	0	0	0.0235	0.003	0.0463	0.051	0.0517
Ni	0.0012	0	0	0.0018	0.0001	0.0048	0.0001	0.0059	0	0.0014	0	0.0056	0.0007	0.0062	0.0012
Total	7.2224	6.3251	6.3222	6.908	7.2382	9.2756	7.144	10.0443	10.013	5.0048	5.0389	9.97	5.1579	6.8148	5.3221
O	22	32	32	10	22	10	22	10	10	2	10	10	10	10	10
Si	5.79986	11.9334	11.9235	3.3937	5.83528	0.7438	5.94022	0	0	0.99924	4.9754	0.0277	4.7627	3.0877	4.6371
Ti	0.3267	0.0016	0.00096	0.021	0.2365	0.0053	0.26114	0	0	0.00014	0	0	0.0015	0	0
Al	2.02158	3.97248	3.99072	1.1822	2.0152	0.2784	1.97362	0	0	0	0.014	0.0035	0.2351	0.3532	0.2203
Cr	0.00352	0.00384	0	0	0.00594	0	0.00836	0.0006	0.0062	0	0.0008	0.0041	0.0006	0.0045	0.0019
Fe2	1.61766	0	0.00992	0.2308	1.7127	7.9155	1.55408	0.0169	0.0142	0.0004	0.0051	9.9099	0.0313	3.2004	0.3207
Mn	0.01914	0.00192	0	0.0022	0.02332	0	0.02618	0.0122	0.0129	0	0.0003	0	0	0	0
Mg	4.04118	0	0	0.2452	4.0777	0	4.1338	0.012	0.011	2e-05	0	0	0.0438	0	0
Ca	0	0	0.00416	0.0036	0.00374	0	0.0011	9.9075	9.9364	0.0002	0	0.0161	0.0023	0	0.0002
Na	0.23892	0.18432	4.26528	0.682	0.3344	0.0853	0.20174	0.0892	0.0323	0.00066	0.0198	0	0.0336	0.1118	0.089
K	1.81808	4.14272	0.0368	1.1456	1.6786	0.2426	1.61634	0	0	0	0.0235	0.003	0.0463	0.051	0.0517
Ni	0.00264	0	0	0.0018	0.00022	0.0048	0.00022	0.0059	0	0.00028	0	0.0056	0.0007	0.0062	0.0012
Total	15.8893	20.2403	20.231	6.908	15.924	9.2756	15.7168	10.0443	10.013	1.00096	5.0389	9.97	5.1579	6.8148	5.3221
X	45.03	45.966	45.811	44.563	44.563	44.696	43.631	36.383	35.386	36.062	68.941	68.86	68.667	69.064	69.006
Y	74.832	75.622	75.351	73.88	73.88	74.196	73.878	64.564	66.656	54.033	77.348	75.759	71.424	66.193	65.715
CH1	CH2	CH3		Counting time
				Peak	-ve bg	+bg
Na	K	Fe		2 x 10	2 x 5	2 x 5
Mg	Ca	Mn		2 x 10	2 x 5	2 x 5
Al	Ti	Ni		2 x 10	2 x 5	2 x 5
Si		Cr		2 x 10	2 x 5	2 x 5
				2 x 10	2 x 5	2 x 5
