# Supplementary material for: The Petrology & Geochemistry of REE-Enriched, Alkaline Vol-Canic Rocks of Ambitle Island, Feni Island Group, Papua New Guinea
Source: Preprints.org preprint supplement (doi:10.20944/preprints202306.0971.v1), 2023-06-14
Supplement: Supplementary file 22 [file op04.xlsx]

## Sheet: op04
Generated from op04.TXT by VB Plum system Version 1.09 on 15/04/2010 at 09:35:48								15 kV	30 nA	10 μm
	1	2	3	4	5	6	7	8	9	10	11	12	13	14	15
	++++	++++	++++	++++	++++	++++	++++	++++	++++	++++	++++	++++	++++	++++	++++
SiO2	56.807	48.781	52.685	56.842	54.884	56.267	53.043	56.127	56.036	50.627	49.221	49.292	49.106	50.509	50.309
TiO2	0	0.898	0	0	0.014	0.048	0	0.012	0	0.468	0.642	0.565	0.647	0.501	0.624
Al2O3	28.859	5.528	27.441	26.751	28.565	27.511	29.999	27.201	27.954	3.356	4.638	4.778	5.168	3.18	3.615
Cr2O3	0.008	0	0.018	0	0.016	0	0.004	0.02	0	0.042	0.034	0.01	0.01	0.004	0.018
FeO	0.058	6.983	0.021	0.327	0.418	0.386	0.366	0.381	0.363	6.163	6.795	6.534	6.901	6.618	6.575
MnO	0	0.214	0	0.02	0	0	0.013	0.009	0.026	0.299	0.136	0.182	0.177	0.257	0.279
MgO	0.016	12.173	0	0	0.002	0.009	0.005	0.022	0	13.146	12.607	12.309	12.159	12.634	12.765
CaO	2.43	22.019	2.746	7.883	9.731	8.547	11.139	8.464	8.947	21.909	21.941	21.87	21.91	21.55	21.798
Na2O	8.867	0.781	10.592	6.545	5.454	6.224	4.614	6.275	5.906	0.738	0.687	0.707	0.636	0.844	0.807
K2O	0.142	0.028	0.213	0.557	0.347	0.517	0.3	0.46	0.451	0.021	0	0.024	0	0.004	0.027
NiO	0.026	0	0	0.046	0	0	0	0.017	0.012	0	0.051	0.018	0.001	0	0
Total	97.213	97.405	93.716	98.971	99.431	99.509	99.483	98.988	99.695	96.769	96.752	96.289	96.715	96.101	96.817
O	10	10	10	10	10	10	10	10	10	10	10	10	10	10	10
Si	3.2271	3.1027	3.1496	3.2213	3.1078	3.177	3.0129	3.1853	3.1582	3.2216	3.146	3.1595	3.1383	3.2399	3.2066
Ti	0	0.043	0	0	0.0006	0.002	0	0.0005	0	0.0224	0.0309	0.0272	0.0311	0.0242	0.0299
Al	1.9324	0.4144	1.9336	1.7869	1.9065	1.831	2.0084	1.8195	1.857	0.2517	0.3494	0.361	0.3893	0.2404	0.2716
Cr	0.0004	0	0.0009	0	0.0007	0	0.0002	0.0009	0	0.0021	0.0017	0.0005	0.0005	0.0002	0.0009
Fe2	0.0028	0.3715	0.001	0.0155	0.0198	0.0182	0.0174	0.0181	0.0171	0.328	0.3632	0.3503	0.3688	0.355	0.3505
Mn	0	0.0115	0	0.001	0	0	0.0006	0.0004	0.0012	0.0161	0.0074	0.0099	0.0096	0.014	0.0151
Mg	0.0014	1.1542	0	0	0.0002	0.0008	0.0004	0.0019	0	1.247	1.2012	1.1761	1.1584	1.2081	1.2129
Ca	0.1479	1.5006	0.1759	0.4787	0.5904	0.5171	0.6779	0.5147	0.5403	1.4938	1.5026	1.5021	1.5003	1.4812	1.4887
Na	0.9767	0.0963	1.2278	0.7192	0.5988	0.6814	0.5082	0.6905	0.6454	0.0911	0.0851	0.0879	0.0788	0.105	0.0997
K	0.0103	0.0023	0.0162	0.0403	0.0251	0.0372	0.0217	0.0333	0.0324	0.0017	0	0.002	0	0.0003	0.0022
Ni	0.0012	0	0	0.0021	0	0	0	0.0008	0.0005	0	0.0026	0.0009	0.0001	0	0
Total	6.3	6.6965	6.5051	6.265	6.2499	6.2648	6.2478	6.2659	6.2522	6.6755	6.6902	6.6774	6.6751	6.6683	6.6782
O	10	10	10	10	10	10	10	10	10	10	10	10	10	10	10
Si	3.2271	3.1027	3.1496	3.2213	3.1078	3.177	3.0129	3.1853	3.1582	3.2216	3.146	3.1595	3.1383	3.2399	3.2066
Ti	0	0.043	0	0	0.0006	0.002	0	0.0005	0	0.0224	0.0309	0.0272	0.0311	0.0242	0.0299
Al	1.9324	0.4144	1.9336	1.7869	1.9065	1.831	2.0084	1.8195	1.857	0.2517	0.3494	0.361	0.3893	0.2404	0.2716
Cr	0.0004	0	0.0009	0	0.0007	0	0.0002	0.0009	0	0.0021	0.0017	0.0005	0.0005	0.0002	0.0009
Fe2	0.0028	0.3715	0.001	0.0155	0.0198	0.0182	0.0174	0.0181	0.0171	0.328	0.3632	0.3503	0.3688	0.355	0.3505
Mn	0	0.0115	0	0.001	0	0	0.0006	0.0004	0.0012	0.0161	0.0074	0.0099	0.0096	0.014	0.0151
Mg	0.0014	1.1542	0	0	0.0002	0.0008	0.0004	0.0019	0	1.247	1.2012	1.1761	1.1584	1.2081	1.2129
Ca	0.1479	1.5006	0.1759	0.4787	0.5904	0.5171	0.6779	0.5147	0.5403	1.4938	1.5026	1.5021	1.5003	1.4812	1.4887
Na	0.9767	0.0963	1.2278	0.7192	0.5988	0.6814	0.5082	0.6905	0.6454	0.0911	0.0851	0.0879	0.0788	0.105	0.0997
K	0.0103	0.0023	0.0162	0.0403	0.0251	0.0372	0.0217	0.0333	0.0324	0.0017	0	0.002	0	0.0003	0.0022
Ni	0.0012	0	0	0.0021	0	0	0	0.0008	0.0005	0	0.0026	0.0009	0.0001	0	0
Total	6.3	6.6965	6.5051	6.265	6.2499	6.2648	6.2478	6.2659	6.2522	6.6755	6.6902	6.6774	6.6751	6.6683	6.6782
CH1	CH2	CH3		Counting time
				Peak	-ve bg	+bg
Na	K	Fe		2 x 10	2 x 5	2 x 5
Mg	Ca	Mn		2 x 10	2 x 5	2 x 5
Al	Ti	Ni		2 x 10	2 x 5	2 x 5
Si		Cr		2 x 10	2 x 5	2 x 5
				2 x 10	2 x 5	2 x 5
