# Supplementary material for: The Petrology & Geochemistry of REE-Enriched, Alkaline Vol-Canic Rocks of Ambitle Island, Feni Island Group, Papua New Guinea
Source: Preprints.org preprint supplement (doi:10.20944/preprints202306.0971.v1), 2023-06-14
Supplement: Supplementary file 23 [file op05.xlsx]

## Sheet: op05
Generated from op05.TXT by VB Plum system Version 1.09 on 15/04/2010 at 09:36:07								15 kV	30 nA	10 μm
	1	2	3	4	5	6	7	8	9	10	11	12	13	14	15	16	17	18	19	20
	++++	++++	++++	++++	++++	++++	++++	++++	++++	++++	++++	++++	++++	++++	++++	++++	++++	++++	++++	++++
SiO2	48.142	54.323	54.213	1.102	65.094	53.425	53.137	1.026	0.124	49	0	54.557	49.837	48.469	49.804	48.52	47.445	46.184	50.575	49.393
TiO2	1.151	0	0.154	8.851	0.179	0.079	0.022	0	6.997	0.811	0	0	0.687	0.761	0.562	0.689	0.973	1.399	0.629	0.632
Al2O3	6.248	0.73	1.136	4.764	20.862	29.612	29.611	1.097	4.716	5.372	0	28.61	4.917	4.92	4.488	4.856	7.067	8.154	4.172	4.385
Cr2O3	0.04	0	0.002	0.024	0	0	0.034	0.012	0	0	0.01	0.02	0.016	0	0	0	0	0.072	0	0
FeO	6.336	4.477	4.669	64.499	0.375	0.389	0.415	0.746	63.528	7.259	0.016	0.278	6.17	5.946	5.647	6.058	6.924	7.003	5.446	5.77
MnO	0.142	0.171	0.197	1.139	0	0.016	0.004	0.423	0.65	0.105	0.061	0	0.073	0.136	0.118	0.116	0.073	0.116	0.117	0.102
MgO	13.47	16.194	15.823	1.067	0	0.034	0.035	0.988	2.01	13.543	0.103	0.091	13.674	12.995	13.703	13.461	12.282	11.671	13.574	13.549
CaO	22.484	22.546	22.519	0.234	1.945	11.024	11.101	50.608	0.417	21.65	54.162	3.25	20.92	21.626	21.057	21.66	20.686	20.801	21.052	20.792
Na2O	0.395	0.746	0.664	0.006	8.614	5.032	4.662	0.049	0	0.377	0	10.174	0.376	0.427	0.4	0.41	0.471	0.513	0.59	0.436
K2O	0	0.014	0	0.034	3.612	0.384	0.407	0.065	0.033	0.006	0	0.74	0.016	0.007	0.017	0.018	0.02	0.014	0	0
NiO	0	0.028	0.098	0.085	0.005	0	0.012	0.025	0	0.031	0.028	0.015	0	0	0.024	0	0	0.026	0.031	0.025
Total	98.408	99.229	99.475	81.805	100.686	99.995	99.44	55.039	78.475	98.154	54.38	97.735	96.686	95.287	95.82	95.788	95.941	95.953	96.186	95.084
O	10	10	10	10	10	10	10	10	10	10	10	10	10	10	10	10	10	10	10	10
Si	3.0262	3.3352	3.3223	0.1364	3.6083	3.0243	3.0228	0.1688	0.0163	3.0884	0	3.1369	3.1579	3.1304	3.18	3.12	3.0483	2.9769	3.2108	3.1801
Ti	0.0544	0	0.0071	0.8237	0.0075	0.0034	0.0009	0	0.6901	0.0384	0	0	0.0327	0.037	0.027	0.0333	0.047	0.0678	0.03	0.0306
Al	0.4629	0.0528	0.0821	0.6949	1.3631	1.9759	1.9855	0.2127	0.729	0.3991	0	1.939	0.3672	0.3745	0.3378	0.3681	0.5352	0.6195	0.3122	0.3328
Cr	0.002	0	0.0001	0.0023	0	0	0.0015	0.0016	0	0	0.0014	0.0009	0.0008	0	0	0	0	0.0037	0	0
Fe2	0.3331	0.2299	0.2393	6.675	0.0174	0.0184	0.0197	0.1026	6.9674	0.3826	0.0023	0.0134	0.327	0.3212	0.3015	0.3258	0.372	0.3775	0.2892	0.3107
Mn	0.0076	0.0089	0.0102	0.1194	0	0.0008	0.0002	0.0589	0.0722	0.0056	0.0089	0	0.0039	0.0074	0.0064	0.0063	0.004	0.0063	0.0063	0.0056
Mg	1.2622	1.4821	1.4455	0.1968	0	0.0029	0.003	0.2423	0.3929	1.2725	0.0263	0.0078	1.2916	1.2511	1.3043	1.2903	1.1763	1.1214	1.2846	1.3004
Ca	1.5144	1.4832	1.4787	0.031	0.1155	0.6687	0.6767	8.9194	0.0586	1.4621	9.9566	0.2002	1.4204	1.4966	1.4406	1.4924	1.4241	1.4366	1.4321	1.4344
Na	0.0481	0.0888	0.0789	0.0014	0.9259	0.5523	0.5142	0.0156	0	0.0461	0	1.1343	0.0462	0.0535	0.0495	0.0511	0.0587	0.0641	0.0726	0.0544
K	0	0.0011	0	0.0054	0.2554	0.0277	0.0295	0.0136	0.0055	0.0005	0	0.0543	0.0013	0.0006	0.0014	0.0015	0.0016	0.0012	0	0
Ni	0	0.0014	0.0048	0.0085	0.0002	0	0.0005	0.0033	0	0.0016	0.0039	0.0007	0	0	0.0012	0	0	0.0013	0.0016	0.0013
Total	6.711	6.6834	6.669	8.6947	6.2933	6.2744	6.2546	9.7388	8.9319	6.6969	9.9993	6.4874	6.6491	6.6724	6.6496	6.6889	6.6673	6.6764	6.6394	6.6502
O	10	10	10	10	10	10	10	10	10	10	10	10	10	10	10	10	10	10	10	10
Si	3.0262	3.3352	3.3223	0.1364	3.6083	3.0243	3.0228	0.1688	0.0163	3.0884	0	3.1369	3.1579	3.1304	3.18	3.12	3.0483	2.9769	3.2108	3.1801
Ti	0.0544	0	0.0071	0.8237	0.0075	0.0034	0.0009	0	0.6901	0.0384	0	0	0.0327	0.037	0.027	0.0333	0.047	0.0678	0.03	0.0306
Al	0.4629	0.0528	0.0821	0.6949	1.3631	1.9759	1.9855	0.2127	0.729	0.3991	0	1.939	0.3672	0.3745	0.3378	0.3681	0.5352	0.6195	0.3122	0.3328
Cr	0.002	0	0.0001	0.0023	0	0	0.0015	0.0016	0	0	0.0014	0.0009	0.0008	0	0	0	0	0.0037	0	0
Fe2	0.3331	0.2299	0.2393	6.675	0.0174	0.0184	0.0197	0.1026	6.9674	0.3826	0.0023	0.0134	0.327	0.3212	0.3015	0.3258	0.372	0.3775	0.2892	0.3107
Mn	0.0076	0.0089	0.0102	0.1194	0	0.0008	0.0002	0.0589	0.0722	0.0056	0.0089	0	0.0039	0.0074	0.0064	0.0063	0.004	0.0063	0.0063	0.0056
Mg	1.2622	1.4821	1.4455	0.1968	0	0.0029	0.003	0.2423	0.3929	1.2725	0.0263	0.0078	1.2916	1.2511	1.3043	1.2903	1.1763	1.1214	1.2846	1.3004
Ca	1.5144	1.4832	1.4787	0.031	0.1155	0.6687	0.6767	8.9194	0.0586	1.4621	9.9566	0.2002	1.4204	1.4966	1.4406	1.4924	1.4241	1.4366	1.4321	1.4344
Na	0.0481	0.0888	0.0789	0.0014	0.9259	0.5523	0.5142	0.0156	0	0.0461	0	1.1343	0.0462	0.0535	0.0495	0.0511	0.0587	0.0641	0.0726	0.0544
K	0	0.0011	0	0.0054	0.2554	0.0277	0.0295	0.0136	0.0055	0.0005	0	0.0543	0.0013	0.0006	0.0014	0.0015	0.0016	0.0012	0	0
Ni	0	0.0014	0.0048	0.0085	0.0002	0	0.0005	0.0033	0	0.0016	0.0039	0.0007	0	0	0.0012	0	0	0.0013	0.0016	0.0013
Total	6.711	6.6834	6.669	8.6947	6.2933	6.2744	6.2546	9.7388	8.9319	6.6969	9.9993	6.4874	6.6491	6.6724	6.6496	6.6889	6.6673	6.6764	6.6394	6.6502
CH1	CH2	CH3		Counting time
				Peak	-ve bg	+bg
Na	K	Fe		2 x 10	2 x 5	2 x 5
Mg	Ca	Mn		2 x 10	2 x 5	2 x 5
Al	Ti	Ni		2 x 10	2 x 5	2 x 5
Si		Cr		2 x 10	2 x 5	2 x 5
				2 x 10	2 x 5	2 x 5
