# Supplementary material for: The Petrology & Geochemistry of REE-Enriched, Alkaline Vol-Canic Rocks of Ambitle Island, Feni Island Group, Papua New Guinea
Source: Preprints.org preprint supplement (doi:10.20944/preprints202306.0971.v1), 2023-06-14
Supplement: Supplementary file 24 [file op06.xlsx]

## Sheet: op06
Generated from op06.TXT by VB Plum system Version 1.09 on 15/04/2010 at 09:36:28								15 kV	30 nA	10 μm
	1	2	3	4	5	6	7	8	9	10	11	12	13	14	15	16	17	18	19	20	21	22	23	24	25	26	27	28	29
	++++	++++	++++	++++	++++	++++	++++	++++	++++	++++	++++	++++	++++	++++	++++	++++	++++	++++	++++	++++	++++	++++	++++	++++	++++	++++	++++	++++	++++
SiO2	48.408	57.22	46.89	49.832	48.501	57.412	51.391	61.974	60.129	55.786	60.705	61.467	1.431	1.218	1.862	2.622	4.291	12.539	37.698	39.781	42.26	33.278	36.94	34.018	47.281	47.742	30.912	9.163	14.104
TiO2	1.015	0.055	1.178	0.578	1.206	0.118	0	0.019	0.011	0.021	0	0.048	0	0	0	0	0	0	0	0.012	0.021	0	0.032	0	0	0	0	0	0.001
Al2O3	6.691	25.142	7.959	3.772	19.88	22.623	26.832	21.653	23.689	28.482	25.515	22.183	0.24	0.234	0.199	0.296	0.648	0.27	0.122	1.543	2.581	1.35	3.981	6.684	0.717	0.75	23.196	2.985	9.225
Cr2O3	0	0	0.026	0	0.002	0.012	0.018	0.014	0.018	0	0.004	0.032	0	0	0	0	0	0	0	0	0.046	0.044	0.008	0.006	0.008	0	0	0	0
FeO	4.159	0.843	4.66	3.555	7.777	1.295	1.618	0.532	0.503	0.276	0.263	0.484	0.667	0.552	0.471	0.553	0.751	0.752	0.612	0	0.031	0.688	0.552	0.729	0	0.044	0.01	0.617	1.111
MnO	0.143	0.014	0.087	0.097	0.121	0.029	0.023	0	0	0.016	0.007	0.014	0	0.011	0	0.009	0.024	0	0.016	0	0.013	0.013	0	0.03	0	0.038	0	0	0.026
MgO	12.553	0.716	11.643	13.257	2.185	1.631	2.555	0.573	0.372	0.004	0.043	0.282	1.033	1.739	3.308	9.561	8.788	10.45	11.744	0	0	8.935	11.085	9.822	3.15	3.262	0.01	0.021	0.02
CaO	19.474	1.984	19.162	19.578	2.227	1.821	2.404	1.505	1.623	8.041	3.363	1.36	0.229	0.197	0.185	0.209	0.225	0.192	0.187	0.012	0.018	0.164	0.197	0.156	0.077	0.086	0.071	0.057	0.145
Na2O	0.756	5.528	0.465	0.548	6.679	5.281	7.8	4.048	4.488	5.152	7.833	5.621	0.044	0.07	0.036	0.056	0.064	0.044	0.063	0.335	0.491	0.037	0	0.05	0.995	1.051	0.56	1.29	0.966
K2O	0.037	5.43	0.042	0	3.464	4.705	0.714	7.415	6.406	0.546	1.277	5.813	0	0	0	0	0	0	0	0.128	0.135	0	0	0	0.022	0	0	5.296	4.287
NiO	0.018	0.009	0	0	0.019	0	0.024	0.011	0	0	0.012	0	0.029	0.04	0	0.033	0	0	0.031	0	0	0	0	0	0	0.011	0	0	0.007
Total	93.254	96.941	92.112	91.217	92.061	94.927	93.379	97.744	97.239	98.324	99.022	97.304	3.673	4.061	6.061	13.339	14.791	24.247	50.473	41.811	45.596	44.509	52.795	51.495	52.25	52.984	54.759	19.429	29.892
O	10	10	10	10	10	10	10	10	10	10	10	10	10	10	10	10	10	10	10	10	10	10	10	10	10	10	10	10	10
Si	3.1409	3.3323	3.085	3.2886	3.1308	3.4047	3.0951	3.5648	3.469	3.1666	3.3944	3.5383	2.5126	1.9569	1.9327	1.2609	1.8045	2.9847	4.0134	4.8087	4.7067	4.004	3.7627	3.5676	4.6538	4.6414	2.9873	3.1771	2.8589
Ti	0.0495	0.0024	0.0583	0.0287	0.0585	0.0053	0	0.0008	0.0005	0.0009	0	0.0021	0	0	0	0	0	0	0	0.0011	0.0018	0	0.0025	0	0	0	0	0	0.0002
Al	0.5117	1.7258	0.6172	0.2934	1.5126	1.5814	1.9048	1.4681	1.6109	1.9056	1.6817	1.5052	0.4967	0.4431	0.2435	0.1678	0.3212	0.0758	0.0153	0.2198	0.3388	0.1915	0.478	0.8262	0.0832	0.0859	2.6422	1.2199	2.2041
Cr	0	0	0.0014	0	0.0001	0.0006	0.0009	0.0006	0.0008	0	0.0002	0.0015	0	0	0	0	0	0	0	0	0.0041	0.0042	0.0006	0.0005	0.0006	0	0	0	0
Fe2	0.2257	0.0411	0.2564	0.1962	0.4198	0.0642	0.0815	0.0256	0.0243	0.0131	0.0123	0.0233	0.9794	0.7417	0.4089	0.2224	0.2641	0.1497	0.0545	0	0.0029	0.0692	0.047	0.0639	0	0.0036	0.0008	0.1789	0.1883
Mn	0.0079	0.0007	0.0048	0.0054	0.0066	0.0015	0.0012	0	0	0.0008	0.0003	0.0007	0	0.015	0	0.0037	0.0085	0	0.0014	0	0.0012	0.0013	0	0.0027	0	0.0031	0	0	0.0045
Mg	1.2141	0.0622	1.1419	1.3042	0.2103	0.1442	0.2294	0.0491	0.032	0.0003	0.0036	0.0242	2.7037	4.1649	5.1185	6.8539	5.5091	3.7081	1.8638	0	0	1.6026	1.6832	1.5355	0.4622	0.4727	0.0014	0.0109	0.006
Ca	1.3539	0.1238	1.3509	1.3844	0.154	0.1157	0.1551	0.0928	0.1003	0.4891	0.2015	0.0839	0.4308	0.3391	0.2058	0.1077	0.1014	0.049	0.0213	0.0016	0.0021	0.0211	0.0215	0.0175	0.0081	0.009	0.0074	0.0212	0.0315
Na	0.0951	0.6242	0.0593	0.0701	0.836	0.6073	0.9109	0.4515	0.5021	0.5671	0.8493	0.6274	0.1498	0.2181	0.0725	0.0522	0.0522	0.0203	0.013	0.0785	0.106	0.0086	0	0.0102	0.1899	0.1981	0.1049	0.8673	0.3797
K	0.0031	0.4034	0.0035	0	0.2853	0.356	0.0549	0.5441	0.4715	0.0395	0.0911	0.4269	0	0	0	0	0	0	0	0.0197	0.0192	0	0	0	0.0028	0	0	2.3427	1.1087
Ni	0.0009	0.0004	0	0	0.001	0	0.0012	0.0005	0	0	0.0005	0	0.041	0.0517	0	0.0128	0	0	0.0027	0	0	0	0	0	0	0.0009	0	0	0.0011
Total	6.6028	6.3163	6.5788	6.5711	6.615	6.2807	6.4349	6.1979	6.2114	6.183	6.2349	6.2334	7.314	7.9306	7.9818	8.6813	8.061	6.9875	5.9854	5.1294	5.1828	5.9025	5.9955	6.0241	5.4006	5.4147	5.7441	7.818	6.783
O	10	10	10	10	10	10	10	10	10	10	10	10	10	10	10	10	10	10	10	10	10	10	10	10	10	10	10	10	10
Si	3.1409	3.3323	3.085	3.2886	3.1308	3.4047	3.0951	3.5648	3.469	3.1666	3.3944	3.5383	2.5126	1.9569	1.9327	1.2609	1.8045	2.9847	4.0134	4.8087	4.7067	4.004	3.7627	3.5676	4.6538	4.6414	2.9873	3.1771	2.8589
Ti	0.0495	0.0024	0.0583	0.0287	0.0585	0.0053	0	0.0008	0.0005	0.0009	0	0.0021	0	0	0	0	0	0	0	0.0011	0.0018	0	0.0025	0	0	0	0	0	0.0002
Al	0.5117	1.7258	0.6172	0.2934	1.5126	1.5814	1.9048	1.4681	1.6109	1.9056	1.6817	1.5052	0.4967	0.4431	0.2435	0.1678	0.3212	0.0758	0.0153	0.2198	0.3388	0.1915	0.478	0.8262	0.0832	0.0859	2.6422	1.2199	2.2041
Cr	0	0	0.0014	0	0.0001	0.0006	0.0009	0.0006	0.0008	0	0.0002	0.0015	0	0	0	0	0	0	0	0	0.0041	0.0042	0.0006	0.0005	0.0006	0	0	0	0
Fe2	0.2257	0.0411	0.2564	0.1962	0.4198	0.0642	0.0815	0.0256	0.0243	0.0131	0.0123	0.0233	0.9794	0.7417	0.4089	0.2224	0.2641	0.1497	0.0545	0	0.0029	0.0692	0.047	0.0639	0	0.0036	0.0008	0.1789	0.1883
Mn	0.0079	0.0007	0.0048	0.0054	0.0066	0.0015	0.0012	0	0	0.0008	0.0003	0.0007	0	0.015	0	0.0037	0.0085	0	0.0014	0	0.0012	0.0013	0	0.0027	0	0.0031	0	0	0.0045
Mg	1.2141	0.0622	1.1419	1.3042	0.2103	0.1442	0.2294	0.0491	0.032	0.0003	0.0036	0.0242	2.7037	4.1649	5.1185	6.8539	5.5091	3.7081	1.8638	0	0	1.6026	1.6832	1.5355	0.4622	0.4727	0.0014	0.0109	0.006
Ca	1.3539	0.1238	1.3509	1.3844	0.154	0.1157	0.1551	0.0928	0.1003	0.4891	0.2015	0.0839	0.4308	0.3391	0.2058	0.1077	0.1014	0.049	0.0213	0.0016	0.0021	0.0211	0.0215	0.0175	0.0081	0.009	0.0074	0.0212	0.0315
Na	0.0951	0.6242	0.0593	0.0701	0.836	0.6073	0.9109	0.4515	0.5021	0.5671	0.8493	0.6274	0.1498	0.2181	0.0725	0.0522	0.0522	0.0203	0.013	0.0785	0.106	0.0086	0	0.0102	0.1899	0.1981	0.1049	0.8673	0.3797
K	0.0031	0.4034	0.0035	0	0.2853	0.356	0.0549	0.5441	0.4715	0.0395	0.0911	0.4269	0	0	0	0	0	0	0	0.0197	0.0192	0	0	0	0.0028	0	0	2.3427	1.1087
Ni	0.0009	0.0004	0	0	0.001	0	0.0012	0.0005	0	0	0.0005	0	0.041	0.0517	0	0.0128	0	0	0.0027	0	0	0	0	0	0	0.0009	0	0	0.0011
Total	6.6028	6.3163	6.5788	6.5711	6.615	6.2807	6.4349	6.1979	6.2114	6.183	6.2349	6.2334	7.314	7.9306	7.9818	8.6813	8.061	6.9875	5.9854	5.1294	5.1828	5.9025	5.9955	6.0241	5.4006	5.4147	5.7441	7.818	6.783
X	17.47	17.983	17.988	17.98	17.915	15.359	15.302	15.261	15.41	15.339	13.456	13.481	38.582	38.736	38.787	38.909	38.596	38.596	38.582	39.089	39.367	38.951	38.874	38.831	39.493	39.612	42.005	71.097	69.899
Y	50.036	49.997	49.916	49.842	50.053	49.865	49.818	49.798	49.906	49.777	49.18	49.12	50.846	50.906	50.923	50.976	50.38	50.322	50.285	49.807	49.171	48.417	48.446	48.483	49.416	49.346	48.478	40.852	41.07
CH1	CH2	CH3		Counting time
				Peak	-ve bg	+bg
Na	K	Fe		2 x 10	2 x 5	2 x 5
Mg	Ca	Mn		2 x 10	2 x 5	2 x 5
Al	Ti	Ni		2 x 10	2 x 5	2 x 5
Si		Cr		2 x 10	2 x 5	2 x 5
				2 x 10	2 x 5	2 x 5
