# Supplementary material for: The Petrology & Geochemistry of REE-Enriched, Alkaline Vol-Canic Rocks of Ambitle Island, Feni Island Group, Papua New Guinea
Source: Preprints.org preprint supplement (doi:10.20944/preprints202306.0971.v1), 2023-06-14
Supplement: Supplementary file 26 [file op08 (Autosaved).xlsx]

## Sheet: op08
Generated from op08.TXT by VB Plum system Version 1.09 on 17/12/2010 at 09:31:46								15 kV	32 nA	10 μm
	1	2	3	4	5	6	7	8	9	10	11	12	13	14	15	16	17	18	19	20	21	22	23	24	25	26	27	28	29	30	31	32
	++++	++++	++++	++++	++++	++++	++++	++++	++++	++++	++++	++++	++++	++++	++++	++++	++++	++++	++++	++++	++++	++++	++++	++++	++++	++++	++++	++++	++++	++++	++++	++++
SiO2	50.013	49.642	47.743	48.115	0.03	0	38.697	40.193	39.923	35.261	0.366	39.027	40.102	40.02	55.835	39.108	40.394	37.51	60.337	50.367	46.717	47.295	47.938	47.292	49.735	49.742	49.722	0.098	0.131	2.69	45.887	45.716
TiO2	0.705	0.639	0.968	0.828	5.355	0	2.805	2.654	2.601	3.533	4.798	0	2.579	2.673	0	2.432	0	0	0	0.651	1.16	1.074	1.033	0.867	0.535	0.545	0.463	5.787	5.69	0.039	1.112	1.187
Al2O3	3.693	3.795	4.726	4.225	3.462	0.011	14.028	13.382	13.984	17.465	8.37	29.746	14.107	13.63	23.318	13.787	29.876	29.739	22.492	4.194	5.977	6.337	6.331	6.025	3.55	3.236	3.47	7.83	7.322	0.368	7.04	6.489
Cr2O3	0	0.024	0.042	0.018	0.057	0.015	0	0.02	0.004	0.065	0.021	0	0	0	0	0	0	0	0	0	0	0	0	0	0.018	0	0	0.036	0.027	0.021	0	0.027
FeO	6.51	6.059	7.106	6.724	80.747	0.065	11.067	10.556	11.169	12.349	75.491	0.062	11.242	10.824	0.011	11.039	0.024	0.052	0	7.144	8.298	7.761	7.589	7.397	6.257	6.043	5.917	68.44	68.04	0.854	7.159	6.989
MnO	0.253	0.138	0.081	0.159	1.25	0.055	0.229	0.197	0.189	0.193	0.665	0	0.23	0.233	0.015	0.164	0.003	0.015	0.005	0.345	0.305	0.17	0.318	0.149	0.137	0.143	0.095	0.814	1.07	0.075	0.193	0.288
MgO	14.287	14.439	13.836	14.032	1.044	0.019	13.052	13.831	13.428	16.084	2.8	0	13.528	13.658	0	13.387	0	0	0	13.651	11.98	12.71	12.522	12.745	14.291	14.573	14.842	4.226	2.97	0.949	11.694	11.902
CaO	23.317	24.174	23.933	24.018	0.31	56.543	12.344	12.088	12.107	0.062	0.049	11.943	11.799	12.204	0.328	12.557	11.98	12.264	0.067	23.12	22.943	23.904	23.711	24.153	24.334	24.237	24.27	0.074	1.94	50.066	23.588	23.251
Na2O	0.538	0.409	0.454	0.391	0	0.012	2.288	2.404	2.355	1.471	0.011	3.958	2.383	2.4	12.949	2.257	3.779	3.419	10.887	0.614	0.612	0.434	0.599	0.457	0.36	0.404	0.39	0	0.062	0.016	0.478	0.613
K2O	0.005	0.011	0.005	0	0.098	0.016	1.615	1.635	1.553	7.982	0.333	0.002	1.545	1.573	0.135	1.536	0	0	0.085	0.002	0.005	0.011	0.005	0	0	0.002	0.018	0.006	0	0.038	0	0.033
NiO	0.028	0.02	0	0	0	0	0	0.011	0.026	0.02	0	0.005	0	0	0.032	0	0.028	0.008	0	0	0	0.018	0	0.036	0.006	0.002	0	0	0.055	0	0	0.027
Total	99.349	99.35	98.894	98.51	92.353	56.736	96.125	96.971	97.339	94.485	92.904	84.743	97.515	97.215	92.623	96.267	86.084	83.007	93.873	100.088	97.997	99.714	100.046	99.121	99.223	98.927	99.187	87.311	87.307	55.116	97.151	96.522
O	10	10	10	10	10	10	10	10	10	10	10	10	10	10	10	10	10	10	10	10	10	10	10	10	10	10	10	10	10	10	10	10
Si	3.1238	3.1024	3.0203	3.0499	0.0035	0	2.5493	2.6098	2.5878	2.3848	0.0403	2.6488	2.5918	2.5957	3.3648	2.5695	2.6901	2.6027	3.5259	3.1262	2.995	2.9737	2.9981	2.9893	3.1152	3.1228	3.111	0.0113	0.0152	0.4339	2.9564	2.9666
Ti	0.0331	0.03	0.0461	0.0395	0.4747	0	0.139	0.1296	0.1268	0.1797	0.3969	0	0.1254	0.1304	0	0.1202	0	0	0	0.0304	0.0559	0.0508	0.0486	0.0412	0.0252	0.0257	0.0218	0.4997	0.4963	0.0047	0.0539	0.0579
Al	0.2719	0.2795	0.3524	0.3157	0.481	0.0021	1.0893	1.0242	1.0684	1.3923	1.0851	2.3797	1.0747	1.042	1.6563	1.0677	2.3452	2.4323	1.5492	0.3068	0.4517	0.4696	0.4667	0.4489	0.2621	0.2395	0.2559	1.0596	1.001	0.07	0.5346	0.4963
Cr	0	0.0012	0.0021	0.0009	0.0053	0.002	0	0.001	0.0002	0.0035	0.0018	0	0	0	0	0	0	0	0	0	0	0	0	0	0.0009	0	0	0.0033	0.0025	0.0027	0	0.0014
Fe2	0.3401	0.3167	0.376	0.3565	7.9594	0.0089	0.6097	0.5732	0.6055	0.6985	6.944	0.0035	0.6077	0.5871	0.0006	0.6066	0.0013	0.003	0	0.3708	0.4449	0.4081	0.3969	0.391	0.3278	0.3173	0.3096	6.5717	6.5999	0.1152	0.3857	0.3793
Mn	0.0134	0.0073	0.0043	0.0085	0.1248	0.0077	0.0128	0.0108	0.0104	0.0111	0.062	0	0.0126	0.0128	0.0008	0.0091	0.0002	0.0009	0.0002	0.0181	0.0166	0.0091	0.0168	0.008	0.0073	0.0076	0.005	0.0792	0.1051	0.0102	0.0105	0.0158
Mg	1.3302	1.3451	1.3048	1.3259	0.1834	0.0047	1.2818	1.3387	1.2975	1.6216	0.4591	0	1.3033	1.3206	0	1.3112	0	0	0	1.263	1.1449	1.1913	1.1674	1.2009	1.3344	1.3638	1.3843	0.7233	0.5135	0.2282	1.1231	1.1513
Ca	1.5605	1.6188	1.6223	1.6313	0.0392	9.969	0.8713	0.841	0.8409	0.0045	0.0058	0.8685	0.8171	0.8482	0.0212	0.884	0.8549	0.9118	0.0042	1.5376	1.576	1.6104	1.5889	1.6359	1.6332	1.6304	1.6271	0.0091	0.2411	8.6536	1.6284	1.6167
Na	0.0652	0.0496	0.0557	0.0481	0	0.0038	0.2923	0.3027	0.296	0.1929	0.0023	0.5209	0.2986	0.3018	1.5131	0.2875	0.488	0.46	1.2336	0.0739	0.0761	0.0529	0.0726	0.056	0.0437	0.0492	0.0473	0	0.0139	0.005	0.0597	0.0771
K	0.0004	0.0009	0.0004	0	0.0147	0.0034	0.1357	0.1354	0.1284	0.6887	0.0467	0.0002	0.1274	0.1302	0.0104	0.1288	0	0	0.0063	0.0002	0.0004	0.0009	0.0004	0	0	0.0002	0.0014	0.0009	0	0.0078	0	0.0027
Ni	0.0014	0.001	0	0	0	0	0	0.0006	0.0014	0.0011	0	0.0003	0	0	0.0016	0	0.0015	0.0004	0	0	0	0.0009	0	0.0018	0.0003	0.0001	0	0	0.0051	0	0	0.0014
Total	6.7399	6.7525	6.7844	6.7763	9.286	10.0016	6.9811	6.9671	6.9633	7.1785	9.0439	6.4219	6.9585	6.9689	6.5687	6.9846	6.3812	6.4111	6.3195	6.7271	6.7615	6.7676	6.7565	6.773	6.75	6.7565	6.7636	8.958	8.9937	9.5314	6.7523	6.7666
O	10	10	10	10	10	10	10	10	10	10	10	10	10	10	10	10	10	10	10	10	10	10	10	10	10	10	10	10	10	10	10	10
Si	3.1238	3.1024	3.0203	3.0499	0.0035	0	2.5493	2.6098	2.5878	2.3848	0.0403	2.6488	2.5918	2.5957	3.3648	2.5695	2.6901	2.6027	3.5259	3.1262	2.995	2.9737	2.9981	2.9893	3.1152	3.1228	3.111	0.0113	0.0152	0.4339	2.9564	2.9666
Ti	0.0331	0.03	0.0461	0.0395	0.4747	0	0.139	0.1296	0.1268	0.1797	0.3969	0	0.1254	0.1304	0	0.1202	0	0	0	0.0304	0.0559	0.0508	0.0486	0.0412	0.0252	0.0257	0.0218	0.4997	0.4963	0.0047	0.0539	0.0579
Al	0.2719	0.2795	0.3524	0.3157	0.481	0.0021	1.0893	1.0242	1.0684	1.3923	1.0851	2.3797	1.0747	1.042	1.6563	1.0677	2.3452	2.4323	1.5492	0.3068	0.4517	0.4696	0.4667	0.4489	0.2621	0.2395	0.2559	1.0596	1.001	0.07	0.5346	0.4963
Cr	0	0.0012	0.0021	0.0009	0.0053	0.002	0	0.001	0.0002	0.0035	0.0018	0	0	0	0	0	0	0	0	0	0	0	0	0	0.0009	0	0	0.0033	0.0025	0.0027	0	0.0014
Fe2	0.3401	0.3167	0.376	0.3565	7.9594	0.0089	0.6097	0.5732	0.6055	0.6985	6.944	0.0035	0.6077	0.5871	0.0006	0.6066	0.0013	0.003	0	0.3708	0.4449	0.4081	0.3969	0.391	0.3278	0.3173	0.3096	6.5717	6.5999	0.1152	0.3857	0.3793
Mn	0.0134	0.0073	0.0043	0.0085	0.1248	0.0077	0.0128	0.0108	0.0104	0.0111	0.062	0	0.0126	0.0128	0.0008	0.0091	0.0002	0.0009	0.0002	0.0181	0.0166	0.0091	0.0168	0.008	0.0073	0.0076	0.005	0.0792	0.1051	0.0102	0.0105	0.0158
Mg	1.3302	1.3451	1.3048	1.3259	0.1834	0.0047	1.2818	1.3387	1.2975	1.6216	0.4591	0	1.3033	1.3206	0	1.3112	0	0	0	1.263	1.1449	1.1913	1.1674	1.2009	1.3344	1.3638	1.3843	0.7233	0.5135	0.2282	1.1231	1.1513
Ca	1.5605	1.6188	1.6223	1.6313	0.0392	9.969	0.8713	0.841	0.8409	0.0045	0.0058	0.8685	0.8171	0.8482	0.0212	0.884	0.8549	0.9118	0.0042	1.5376	1.576	1.6104	1.5889	1.6359	1.6332	1.6304	1.6271	0.0091	0.2411	8.6536	1.6284	1.6167
Na	0.0652	0.0496	0.0557	0.0481	0	0.0038	0.2923	0.3027	0.296	0.1929	0.0023	0.5209	0.2986	0.3018	1.5131	0.2875	0.488	0.46	1.2336	0.0739	0.0761	0.0529	0.0726	0.056	0.0437	0.0492	0.0473	0	0.0139	0.005	0.0597	0.0771
K	0.0004	0.0009	0.0004	0	0.0147	0.0034	0.1357	0.1354	0.1284	0.6887	0.0467	0.0002	0.1274	0.1302	0.0104	0.1288	0	0	0.0063	0.0002	0.0004	0.0009	0.0004	0	0	0.0002	0.0014	0.0009	0	0.0078	0	0.0027
Ni	0.0014	0.001	0	0	0	0	0	0.0006	0.0014	0.0011	0	0.0003	0	0	0.0016	0	0.0015	0.0004	0	0	0	0.0009	0	0.0018	0.0003	0.0001	0	0	0.0051	0	0	0.0014
Total	6.7399	6.7525	6.7844	6.7763	9.286	10.0016	6.9811	6.9671	6.9633	7.1785	9.0439	6.4219	6.9585	6.9689	6.5687	6.9846	6.3812	6.4111	6.3195	6.7271	6.7615	6.7676	6.7565	6.773	6.75	6.7565	6.7636	8.958	8.9937	9.5314	6.7523	6.7666
X	48.684	48.919	49.045	49.079	48.799	48.748	47.441	45.17	45.625	46.114	46.134	47.012	45.784	45.108	27.179	27.037	28.479	28.387	28.8	28.923	29.161	29.416	27.417	27.529	27.684	27.891	27.934	28.663	28.701	28.678	29.175	29.416
Y	76.621	76.666	76.666	76.831	77.255	77.242	76.992	65.01	65.669	65.521	65.482	65.515	65.886	64.605	72.163	71.607	71.078	70.94	71.413	42.581	42.721	44.366	49.964	49.964	49.964	50.103	50.221	50.973	50.874	50.821	51.674	51.674
CH1	CH2	CH3		Counting time
				Peak	-ve bg	+bg
Na	K	Fe		2 x 10	2 x 5	2 x 5
Mg	Ca	Mn		2 x 10	2 x 5	2 x 5
Al	Ti	Ni		2 x 10	2 x 5	2 x 5
Si		Cr		2 x 10	2 x 5	2 x 5
				2 x 10	2 x 5	2 x 5
