# Supplementary material for: The Petrology & Geochemistry of REE-Enriched, Alkaline Vol-Canic Rocks of Ambitle Island, Feni Island Group, Papua New Guinea
Source: Preprints.org preprint supplement (doi:10.20944/preprints202306.0971.v1), 2023-06-14
Supplement: Supplementary file 28 [file AMPH13_OPNA5Point18.xls]

## Sheet: amph13_OPN8B_point13
		AMPHIBOLE CALCULATION SHEET v1.2
			© Jeremy Preston & John Still, 2001
			© Gabbrosoft 2012
Droop equation No 6*			assuming 13 cations excluding Ca,Na & K
(suitable for many calcic amphiboles)
	Wt%	Mol Prop	At Prop O	No anions		Formula	Normalised form.
SiO2	40.102	0.667477	1.33495	11.9228	Si	5.96139	5.89536
TiO2	2.579	0.0322859	0.0645719	0.576706	Ti	0.288353	0.285159
Al2O3	14.107	0.138358	0.415075	3.70712	Al	2.47142	2.44405
Cr2O3	0	0	0	0	Cr	0	0
FeO	11.242	0.156465	0.156465	1.39742	Fe(ii)	1.39742	1.38195
MnO	0.23	0.00324218	0.00324218	0.0289566	Mn	0.0289566	0.0286359
MgO	13.528	0.335682	0.335682	2.99806	Mg	2.99806	2.96485
CaO	11.799	0.210396	0.210396	1.87909	Ca	1.87909	1.85828
Na2O	2.383	0.0384479	0.0384479	0.343387	Na	0.686774	0.679167
K2O	1.545	0.0164013	0.0164013	0.146483	K	0.292967	0.289722								For classiftcation spread sheet**
ZrO2	0	0	0	0	Zr	0	0					Si	5.89536		Si	5.89536
TOTAL	97.515		2.57523		TOTAL	16.0044	15.8272					Al (iv)	2.10464		Al	2.10464
												T	8
			No Oxyg	23											Al	0.339407
			T2	8.93123				Cation total ex. Ca,Na&K - (S)		13.1456		Al (vi)	0.339407		Fe(iii)	0.509459
								T = 13	T/S	0.988925		Ti	0.285159		Ti	0.285159
				Formula		Si	5.89536		Fe(ii)	0.872487		Cr	0		Cr	0
SiO2	40.102		Si	5.89536		Al	2.10464		Fe(iii)	0.509459		Fe(iii)	0.509459		Fe(ii)	0.872487
TiO2	2.579		Ti	0.285159					Fe2/(Fe2+Fe3)	0.631347		Fe(ii)	0.872487		Mn	0.0286359
Al2O3	14.107		Al	2.44405		Al	0.339407		Fe3/(Fe3+Fe2)	0.368653		Mn	0.0286359		Mg	2.96485
Cr2O3	0		Cr	0		Fe(iii)	0.509459					Mg	2.96485		Ca	1.85828
Fe2O3	4.60567		Fe(iii)	0.509459		Ti	0.285159					C	5		Na	0.679167
FeO	7.0976		Fe(ii)	0.872487		Cr	0								K	0.289722
MnO	0.23		Mn	0.0286359		Fe(ii)	0.872487		Mg/(Mg+Fe2+)	0.772632		Ca	1.85828		TOTAL	15.8272
MgO	13.528		Mg	2.96485		Mn	0.0286359		Fe3+/(Fe3++[6]Al)	0.600164		Na	0.141718
CaO	11.799		Ca	1.85828		Mg	2.96485					B	2
Na2O	2.383		Na	0.679167		Ca	1.85828
K2O	1.545		K	0.289722		Na	0.679167					Na	0.537449
ZrO2	0		Zr	0		K	0.289722					K	0.289722
TOTAL	97.9763		TOTAL	15.8272		TOTAL	15.8272					A	0.827171
MOLECULAR WEIGHTS
SiO2	60.08		*Min. Mag. 1987, vol 51, pp. 431-435
TiO2	79.88		**amp_class
Al2O3	101.96
Cr2O3	151.99
FeO	71.85		Fe(iii)	0.509459
MnO	70.94		2-Ca	0.141718
MgO	40.3		8-Si	2.10464
CaO	56.08		Al-(8-Si)	0.339407
Na2O	61.98
K2O	94.2
ZrO2	123.22

## Sheet: amph13_OPN8B_point14
		AMPHIBOLE CALCULATION SHEET v1.2
			© Jeremy Preston & John Still, 2001
			© Gabbrosoft 2012
Droop equation No 6*			assuming 13 cations excluding Ca,Na & K
(suitable for many calcic amphiboles)
	Wt%	Mol Prop	At Prop O	No anions		Formula	Normalised form.
SiO2	40.02	0.666112	1.33222	11.9409	Si	5.97045	5.93205
TiO2	2.673	0.0334627	0.0669254	0.599861	Ti	0.299931	0.298002
Al2O3	13.63	0.13368	0.40104	3.59457	Al	2.39638	2.38097
Cr2O3	0	0	0	0	Cr	0	0
FeO	10.824	0.150647	0.150647	1.35027	Fe(ii)	1.35027	1.34159
MnO	0.233	0.00328447	0.00328447	0.0294391	Mn	0.0294391	0.0292498
MgO	13.658	0.338908	0.338908	3.03768	Mg	3.03768	3.01814
CaO	12.204	0.217618	0.217618	1.95054	Ca	1.95054	1.93799
Na2O	2.4	0.0387222	0.0387222	0.347072	Na	0.694144	0.68968
K2O	1.573	0.0166985	0.0166985	0.149671	K	0.299342	0.297417								For classiftcation spread sheet**
ZrO2	0	0	0	0	Zr	0	0					Si	5.93205		Si	5.93205
TOTAL	97.215		2.56607		TOTAL	16.0282	15.9251					Al (iv)	2.06795		Al	2.06795
												T	8
			No Oxyg	23											Al	0.313019
			T2	8.96313				Cation total ex. Ca,Na&K - (S)		13.0842		Al (vi)	0.313019		Fe(iii)	0.295847
								T = 13	T/S	0.993569		Ti	0.298002		Ti	0.298002
				Formula		Si	5.93205		Fe(ii)	1.04574		Cr	0		Cr	0
SiO2	40.02		Si	5.93205		Al	2.06795		Fe(iii)	0.295847		Fe(iii)	0.295847		Fe(ii)	1.04574
TiO2	2.673		Ti	0.298002					Fe2/(Fe2+Fe3)	0.77948		Fe(ii)	1.04574		Mn	0.0292498
Al2O3	13.63		Al	2.38097		Al	0.313019		Fe3/(Fe3+Fe2)	0.22052		Mn	0.0292498		Mg	3.01814
Cr2O3	0		Cr	0		Fe(iii)	0.295847					Mg	3.01814		Ca	1.93799
Fe2O3	2.65258		Fe(iii)	0.295847		Ti	0.298002					C	5		Na	0.68968
FeO	8.43709		Fe(ii)	1.04574		Cr	0								K	0.297417
MnO	0.233		Mn	0.0292498		Fe(ii)	1.04574		Mg/(Mg+Fe2+)	0.742675		Ca	1.93799		TOTAL	15.9251
MgO	13.658		Mg	3.01814		Mn	0.0292498		Fe3+/(Fe3++[6]Al)	0.485898		Na	0.0620084
CaO	12.204		Ca	1.93799		Mg	3.01814					B	2
Na2O	2.4		Na	0.68968		Ca	1.93799
K2O	1.573		K	0.297417		Na	0.68968					Na	0.627671
ZrO2	0		Zr	0		K	0.297417					K	0.297417
TOTAL	97.4807		TOTAL	15.9251		TOTAL	15.9251					A	0.925088
MOLECULAR WEIGHTS
SiO2	60.08		*Min. Mag. 1987, vol 51, pp. 431-435
TiO2	79.88		**amp_class
Al2O3	101.96
Cr2O3	151.99
FeO	71.85		Fe(iii)	0.295847
MnO	70.94		2-Ca	0.0620084
MgO	40.3		8-Si	2.06795
CaO	56.08		Al-(8-Si)	0.313019
Na2O	61.98
K2O	94.2
ZrO2	123.22

## Sheet: amph13_OPN8B_point9
		AMPHIBOLE CALCULATION SHEET v1.2
			© Jeremy Preston & John Still, 2001
			© Gabbrosoft 2012
Droop equation No 6*			assuming 13 cations excluding Ca,Na & K
(suitable for many calcic amphiboles)
	Wt%	Mol Prop	At Prop O	No anions		Formula	Normalised form.
SiO2	39.923	0.664497	1.32899	11.9061	Si	5.95303	5.90572
TiO2	2.601	0.0325613	0.0651227	0.583415	Ti	0.291707	0.289389
Al2O3	13.984	0.137152	0.411455	3.68611	Al	2.4574	2.43787
Cr2O3	0.004	2.63175e-05	7.89526e-05	0.000707312	Cr	0.000471542	0.000467794
FeO	11.169	0.155449	0.155449	1.39262	Fe(ii)	1.39262	1.38155
MnO	0.189	0.00266422	0.00266422	0.023868	Mn	0.023868	0.0236783
MgO	13.428	0.333201	0.333201	2.98505	Mg	2.98505	2.96132
CaO	12.107	0.215888	0.215888	1.93408	Ca	1.93408	1.9187
Na2O	2.355	0.0379961	0.0379961	0.340396	Na	0.680792	0.675381
K2O	1.553	0.0164862	0.0164862	0.147695	K	0.29539	0.293042								For classiftcation spread sheet**
ZrO2	0	0	0	0	Zr	0	0					Si	5.90572		Si	5.90572
TOTAL	97.313		2.56734		TOTAL	16.0144	15.8871					Al (iv)	2.09428		Al	2.09428
												T	8
			No Oxyg	23											Al	0.343591
			T2	8.9587				Cation total ex. Ca,Na&K - (S)		13.1042		Al (vi)	0.343591		Fe(iii)	0.365614
								T = 13	T/S	0.992052		Ti	0.289389		Ti	0.289389
				Formula		Si	5.90572		Fe(ii)	1.01594		Cr	0.000467794		Cr	0.000467794
SiO2	39.923		Si	5.90572		Al	2.09428		Fe(iii)	0.365614		Fe(iii)	0.365614		Fe(ii)	1.01594
TiO2	2.601		Ti	0.289389					Fe2/(Fe2+Fe3)	0.73536		Fe(ii)	1.01594		Mn	0.0236783
Al2O3	13.984		Al	2.43787		Al	0.343591		Fe3/(Fe3+Fe2)	0.26464		Mn	0.0236783		Mg	2.96132
Cr2O3	0.004		Cr	0.000467794		Fe(iii)	0.365614					Mg	2.96132		Ca	1.9187
Fe2O3	3.28474		Fe(iii)	0.365614		Ti	0.289389					C	5		Na	0.675381
FeO	8.21323		Fe(ii)	1.01594		Cr	0.000467794								K	0.293042
MnO	0.189		Mn	0.0236783		Fe(ii)	1.01594		Mg/(Mg+Fe2+)	0.744564		Ca	1.9187		TOTAL	15.8871
MgO	13.428		Mg	2.96132		Mn	0.0236783		Fe3+/(Fe3++[6]Al)	0.515527		Na	0.0812959
CaO	12.107		Ca	1.9187		Mg	2.96132					B	2
Na2O	2.355		Na	0.675381		Ca	1.9187
K2O	1.553		K	0.293042		Na	0.675381					Na	0.594085
ZrO2	0		Zr	0		K	0.293042					K	0.293042
TOTAL	97.642		TOTAL	15.8871		TOTAL	15.8871					A	0.887127
MOLECULAR WEIGHTS
SiO2	60.08		*Min. Mag. 1987, vol 51, pp. 431-435
TiO2	79.88		**amp_class
Al2O3	101.96
Cr2O3	151.99
FeO	71.85		Fe(iii)	0.365614
MnO	70.94		2-Ca	0.0812959
MgO	40.3		8-Si	2.09428
CaO	56.08		Al-(8-Si)	0.343591
Na2O	61.98
K2O	94.2
ZrO2	123.22

## Sheet: amph13_OPN8B_point8
		AMPHIBOLE CALCULATION SHEET v1.2
			© Jeremy Preston & John Still, 2001
			© Gabbrosoft 2012
Droop equation No 6*			assuming 13 cations excluding Ca,Na & K
(suitable for many calcic amphiboles)
	Wt%	Mol Prop	At Prop O	No anions		Formula	Normalised form.
SiO2	40.193	0.668991	1.33798	12.008	Si	6.00399	5.96655
TiO2	2.654	0.0332248	0.0664497	0.596365	Ti	0.298183	0.296323
Al2O3	13.382	0.131248	0.393743	3.53372	Al	2.35581	2.34112
Cr2O3	0	0	0	0	Cr	0	0
FeO	10.556	0.146917	0.146917	1.31854	Fe(ii)	1.31854	1.31031
MnO	0.197	0.00277699	0.00277699	0.0249227	Mn	0.0249227	0.0247673
MgO	13.831	0.343201	0.343201	3.08012	Mg	3.08012	3.06092
CaO	12.088	0.215549	0.215549	1.93449	Ca	1.93449	1.92243
Na2O	2.404	0.0387867	0.0387867	0.348099	Na	0.696197	0.691856
K2O	1.635	0.0173567	0.0173567	0.155771	K	0.311542	0.309599								For classiftcation spread sheet**
ZrO2	0	0	0	0	Zr	0	0					Si	5.96655		Si	5.96655
TOTAL	96.94		2.56276		TOTAL	16.0238	15.9239					Al (iv)	2.03345		Al	2.03345
												T	8
			No Oxyg	23											Al	0.307677
			T2	8.97469				Cation total ex. Ca,Na&K - (S)		13.0816		Al (vi)	0.307677		Fe(iii)	0.286816
								T = 13	T/S	0.993765		Ti	0.296323		Ti	0.296323
				Formula		Si	5.96655		Fe(ii)	1.0235		Cr	0		Cr	0
SiO2	40.193		Si	5.96655		Al	2.03345		Fe(iii)	0.286816		Fe(iii)	0.286816		Fe(ii)	1.0235
TiO2	2.654		Ti	0.296323					Fe2/(Fe2+Fe3)	0.781109		Fe(ii)	1.0235		Mn	0.0247673
Al2O3	13.382		Al	2.34112		Al	0.307677		Fe3/(Fe3+Fe2)	0.218891		Mn	0.0247673		Mg	3.06092
Cr2O3	0		Cr	0		Fe(iii)	0.286816					Mg	3.06092		Ca	1.92243
Fe2O3	2.56778		Fe(iii)	0.286816		Ti	0.296323					C	5		Na	0.691856
FeO	8.24539		Fe(ii)	1.0235		Cr	0								K	0.309599
MnO	0.197		Mn	0.0247673		Fe(ii)	1.0235		Mg/(Mg+Fe2+)	0.749414		Ca	1.92243		TOTAL	15.9239
MgO	13.831		Mg	3.06092		Mn	0.0247673		Fe3+/(Fe3++[6]Al)	0.482454		Na	0.0775745
CaO	12.088		Ca	1.92243		Mg	3.06092					B	2
Na2O	2.404		Na	0.691856		Ca	1.92243
K2O	1.635		K	0.309599		Na	0.691856					Na	0.614282
ZrO2	0		Zr	0		K	0.309599					K	0.309599
TOTAL	97.1972		TOTAL	15.9239		TOTAL	15.9239					A	0.923881
MOLECULAR WEIGHTS
SiO2	60.08		*Min. Mag. 1987, vol 51, pp. 431-435
TiO2	79.88		**amp_class
Al2O3	101.96
Cr2O3	151.99
FeO	71.85		Fe(iii)	0.286816
MnO	70.94		2-Ca	0.0775745
MgO	40.3		8-Si	2.03345
CaO	56.08		Al-(8-Si)	0.307677
Na2O	61.98
K2O	94.2
ZrO2	123.22

## Sheet: amph13_OPN8B_point7
		AMPHIBOLE CALCULATION SHEET v1.2
			© Jeremy Preston & John Still, 2001
			© Gabbrosoft 2012
Droop equation No 6*			assuming 13 cations excluding Ca,Na & K
(suitable for many calcic amphiboles)
	Wt%	Mol Prop	At Prop O	No anions		Formula	Normalised form.
SiO2	38.697	0.644091	1.28818	11.7271	Si	5.86357	5.83293
TiO2	2.805	0.0351152	0.0702303	0.639351	Ti	0.319676	0.318005
Al2O3	14.028	0.137583	0.41275	3.75752	Al	2.50502	2.49193
Cr2O3	0	0	0	0	Cr	0	0
FeO	11.067	0.154029	0.154029	1.40223	Fe(ii)	1.40223	1.3949
MnO	0.229	0.00322808	0.00322808	0.0293872	Mn	0.0293872	0.0292337
MgO	13.052	0.323871	0.323871	2.9484	Mg	2.9484	2.933
CaO	12.344	0.220114	0.220114	2.00384	Ca	2.00384	1.99337
Na2O	2.288	0.0369151	0.0369151	0.336062	Na	0.672123	0.668612
K2O	1.615	0.0171444	0.0171444	0.156076	K	0.312152	0.310521								For classiftcation spread sheet**
ZrO2	0	0	0	0	Zr	0	0					Si	5.83293		Si	5.83293
TOTAL	96.125		2.52646		TOTAL	16.0564	15.9725					Al (iv)	2.16707		Al	2.16707
												T	8
			No Oxyg	23											Al	0.324864
			T2	9.10363				Cation total ex. Ca,Na&K - (S)		13.0683		Al (vi)	0.324864		Fe(iii)	0.24032
								T = 13	T/S	0.994776		Ti	0.318005		Ti	0.318005
				Formula		Si	5.83293		Fe(ii)	1.15458		Cr	0		Cr	0
SiO2	38.697		Si	5.83293		Al	2.16707		Fe(iii)	0.24032		Fe(iii)	0.24032		Fe(ii)	1.15458
TiO2	2.805		Ti	0.318005					Fe2/(Fe2+Fe3)	0.827715		Fe(ii)	1.15458		Mn	0.0292337
Al2O3	14.028		Al	2.49193		Al	0.324864		Fe3/(Fe3+Fe2)	0.172285		Mn	0.0292337		Mg	2.933
Cr2O3	0		Cr	0		Fe(iii)	0.24032					Mg	2.933		Ca	1.99337
Fe2O3	2.11889		Fe(iii)	0.24032		Ti	0.318005					C	5		Na	0.668612
FeO	9.16032		Fe(ii)	1.15458		Cr	0								K	0.310521
MnO	0.229		Mn	0.0292337		Fe(ii)	1.15458		Mg/(Mg+Fe2+)	0.717539		Ca	1.99337		TOTAL	15.9725
MgO	13.052		Mg	2.933		Mn	0.0292337		Fe3+/(Fe3++[6]Al)	0.425207		Na	0.00663126
CaO	12.344		Ca	1.99337		Mg	2.933					B	2
Na2O	2.288		Na	0.668612		Ca	1.99337
K2O	1.615		K	0.310521		Na	0.668612					Na	0.661981
ZrO2	0		Zr	0		K	0.310521					K	0.310521
TOTAL	96.3372		TOTAL	15.9725		TOTAL	15.9725					A	0.972502
MOLECULAR WEIGHTS
SiO2	60.08		*Min. Mag. 1987, vol 51, pp. 431-435
TiO2	79.88		**amp_class
Al2O3	101.96
Cr2O3	151.99
FeO	71.85		Fe(iii)	0.24032
MnO	70.94		2-Ca	0.00663126
MgO	40.3		8-Si	2.16707
CaO	56.08		Al-(8-Si)	0.324864
Na2O	61.98
K2O	94.2
ZrO2	123.22

## Sheet: amph13_point21
		AMPHIBOLE CALCULATION SHEET v1.2
			© Jeremy Preston & John Still, 2001
			© Gabbrosoft 2012
Droop equation No 6*			assuming 13 cations excluding Ca,Na & K
(suitable for many calcic amphiboles)
	Wt%	Mol Prop	At Prop O	No anions		Formula	Normalised form.
SiO2	40.28	0.670439	1.34088	12.0796	Si	6.03982	5.9888
TiO2	2.12	0.0265398	0.0530796	0.478181	Ti	0.23909	0.237071
Al2O3	12.79	0.125441	0.376324	3.39021	Al	2.26014	2.24105
Cr2O3	0.01	6.57938e-05	0.000197381	0.00177816	Cr	0.00118544	0.00117543
FeO	12.25	0.170494	0.170494	1.53594	Fe(ii)	1.53594	1.52296
MnO	0.22	0.00310121	0.00310121	0.027938	Mn	0.027938	0.027702
MgO	13.45	0.333747	0.333747	3.00664	Mg	3.00664	2.98124
CaO	12.18	0.21719	0.21719	1.95661	Ca	1.95661	1.94008
Na2O	2.75	0.0443692	0.0443692	0.39971	Na	0.799421	0.792668
K2O	1.29	0.0136943	0.0136943	0.123368	K	0.246736	0.244652								For classiftcation spread sheet**
ZrO2	0	0	0	0	Zr	0	0					Si	5.9888		Si	5.9888
TOTAL	97.34		2.55308		TOTAL	16.1135	15.9774					Al (iv)	2.0112		Al	2.0112
												T	8
			No Oxyg	23											Al	0.229845
			T2	9.00874				Cation total ex. Ca,Na&K - (S)		13.1107		Al (vi)	0.229845		Fe(iii)	0.388561
								T = 13	T/S	0.991553		Ti	0.237071		Ti	0.237071
				Formula		Si	5.9888		Fe(ii)	1.1344		Cr	0.00117543		Cr	0.00117543
SiO2	40.28		Si	5.9888		Al	2.0112		Fe(iii)	0.388561		Fe(iii)	0.388561		Fe(ii)	1.1344
TiO2	2.12		Ti	0.237071					Fe2/(Fe2+Fe3)	0.744865		Fe(ii)	1.1344		Mn	0.027702
Al2O3	12.79		Al	2.24105		Al	0.229845		Fe3/(Fe3+Fe2)	0.255135		Mn	0.027702		Mg	2.98124
Cr2O3	0.01		Cr	0.00117543		Fe(iii)	0.388561					Mg	2.98124		Ca	1.94008
Fe2O3	3.47326		Fe(iii)	0.388561		Ti	0.237071					C	5		Na	0.792668
FeO	9.1246		Fe(ii)	1.1344		Cr	0.00117543								K	0.244652
MnO	0.22		Mn	0.027702		Fe(ii)	1.1344		Mg/(Mg+Fe2+)	0.724368		Ca	1.94008		TOTAL	15.9774
MgO	13.45		Mg	2.98124		Mn	0.027702		Fe3+/(Fe3++[6]Al)	0.628327		Na	0.0599208
CaO	12.18		Ca	1.94008		Mg	2.98124					B	2
Na2O	2.75		Na	0.792668		Ca	1.94008
K2O	1.29		K	0.244652		Na	0.792668					Na	0.732747
ZrO2	0		Zr	0		K	0.244652					K	0.244652
TOTAL	97.6879		TOTAL	15.9774		TOTAL	15.9774					A	0.977399
MOLECULAR WEIGHTS
SiO2	60.08		*Min. Mag. 1987, vol 51, pp. 431-435
TiO2	79.88		**amp_class
Al2O3	101.96
Cr2O3	151.99
FeO	71.85		Fe(iii)	0.388561
MnO	70.94		2-Ca	0.0599208
MgO	40.3		8-Si	2.0112
CaO	56.08		Al-(8-Si)	0.229845
Na2O	61.98
K2O	94.2
ZrO2	123.22

## Sheet: amph13_point20
		AMPHIBOLE CALCULATION SHEET v1.2
			© Jeremy Preston & John Still, 2001
			© Gabbrosoft 2012
Droop equation No 6*			assuming 13 cations excluding Ca,Na & K
(suitable for many calcic amphiboles)
	Wt%	Mol Prop	At Prop O	No anions		Formula	Normalised form.
SiO2	40.18	0.668775	1.33755	11.9943	Si	5.99715	5.93289
TiO2	1.94	0.0242864	0.0485729	0.435571	Ti	0.217785	0.215452
Al2O3	13.41	0.131522	0.394566	3.53822	Al	2.35882	2.33354
Cr2O3	0.01	6.57938e-05	0.000197381	0.00176999	Cr	0.00117999	0.00116735
FeO	12.21	0.169937	0.169937	1.52389	Fe(ii)	1.52389	1.50756
MnO	0.16	0.00225543	0.00225543	0.0202252	Mn	0.0202252	0.0200085
MgO	13.58	0.336973	0.336973	3.02176	Mg	3.02176	2.98938
CaO	12.29	0.219151	0.219151	1.96521	Ca	1.96521	1.94415
Na2O	2.64	0.0425944	0.0425944	0.38196	Na	0.763919	0.755734
K2O	1.23	0.0130573	0.0130573	0.11709	K	0.23418	0.23167								For classiftcation spread sheet**
ZrO2	0	0	0	0	Zr	0	0					Si	5.93289		Si	5.93289
TOTAL	97.65		2.56486		TOTAL	16.1041	15.9316					Al (iv)	2.06711		Al	2.06711
												T	8
			No Oxyg	23											Al	0.266431
			T2	8.96737				Cation total ex. Ca,Na&K - (S)		13.1408		Al (vi)	0.266431		Fe(iii)	0.4929
								T = 13	T/S	0.989285		Ti	0.215452		Ti	0.215452
				Formula		Si	5.93289		Fe(ii)	1.01466		Cr	0.00116735		Cr	0.00116735
SiO2	40.18		Si	5.93289		Al	2.06711		Fe(iii)	0.4929		Fe(iii)	0.4929		Fe(ii)	1.01466
TiO2	1.94		Ti	0.215452					Fe2/(Fe2+Fe3)	0.673048		Fe(ii)	1.01466		Mn	0.0200085
Al2O3	13.41		Al	2.33354		Al	0.266431		Fe3/(Fe3+Fe2)	0.326952		Mn	0.0200085		Mg	2.98938
Cr2O3	0.01		Cr	0.00116735		Fe(iii)	0.4929					Mg	2.98938		Ca	1.94415
Fe2O3	4.4364		Fe(iii)	0.4929		Ti	0.215452					C	5		Na	0.755734
FeO	8.21792		Fe(ii)	1.01466		Cr	0.00116735								K	0.23167
MnO	0.16		Mn	0.0200085		Fe(ii)	1.01466		Mg/(Mg+Fe2+)	0.746591		Ca	1.94415		TOTAL	15.9316
MgO	13.58		Mg	2.98938		Mn	0.0200085		Fe3+/(Fe3++[6]Al)	0.649124		Na	0.055848
CaO	12.29		Ca	1.94415		Mg	2.98938					B	2
Na2O	2.64		Na	0.755734		Ca	1.94415
K2O	1.23		K	0.23167		Na	0.755734					Na	0.699885
ZrO2	0		Zr	0		K	0.23167					K	0.23167
TOTAL	98.0943		TOTAL	15.9316		TOTAL	15.9316					A	0.931556
MOLECULAR WEIGHTS
SiO2	60.08		*Min. Mag. 1987, vol 51, pp. 431-435
TiO2	79.88		**amp_class
Al2O3	101.96
Cr2O3	151.99
FeO	71.85		Fe(iii)	0.4929
MnO	70.94		2-Ca	0.055848
MgO	40.3		8-Si	2.06711
CaO	56.08		Al-(8-Si)	0.266431
Na2O	61.98
K2O	94.2
ZrO2	123.22

## Sheet: amph13_point42_job7
		AMPHIBOLE CALCULATION SHEET v1.2
			© Jeremy Preston & John Still, 2001
			© Gabbrosoft 2012
Droop equation No 6*			assuming 13 cations excluding Ca,Na & K
(suitable for many calcic amphiboles)
	Wt%	Mol Prop	At Prop O	No anions		Formula	Normalised form.
SiO2	40.475	0.673685	1.34737	12.2581	Si	6.12907	6.05636
TiO2	1.638	0.0205058	0.0410115	0.373116	Ti	0.186558	0.184345
Al2O3	12.363	0.121253	0.36376	3.30943	Al	2.20629	2.18011
Cr2O3	0.025	0.000164485	0.000493454	0.00448936	Cr	0.0029929	0.0029574
FeO	11.21	0.156019	0.156019	1.41944	Fe(ii)	1.41944	1.4026
MnO	0.165	0.00232591	0.00232591	0.0211607	Mn	0.0211607	0.0209097
MgO	14.133	0.350695	0.350695	3.19056	Mg	3.19056	3.15271
CaO	11.96	0.213267	0.213267	1.94026	Ca	1.94026	1.91725
Na2O	2.399	0.038706	0.038706	0.352141	Na	0.704282	0.695927
K2O	1.359	0.0144268	0.0144268	0.131252	K	0.262504	0.25939								For classiftcation spread sheet**
ZrO2	0	0	0	0	Zr	0	0					Si	6.05636		Si	6.05636
TOTAL	95.727		2.52808		TOTAL	16.0631	15.8726					Al (iv)	1.94364		Al	1.94364
												T	8
			No Oxyg	23											Al	0.236476
			T2	9.09783				Cation total ex. Ca,Na&K - (S)		13.1561		Al (vi)	0.236476		Fe(iii)	0.545702
								T = 13	T/S	0.988137		Ti	0.184345		Ti	0.184345
				Formula		Si	6.05636		Fe(ii)	0.856898		Cr	0.0029574		Cr	0.0029574
SiO2	40.475		Si	6.05636		Al	1.94364		Fe(iii)	0.545702		Fe(iii)	0.545702		Fe(ii)	0.856898
TiO2	1.638		Ti	0.184345					Fe2/(Fe2+Fe3)	0.610936		Fe(ii)	0.856898		Mn	0.0209097
Al2O3	12.363		Al	2.18011		Al	0.236476		Fe3/(Fe3+Fe2)	0.389064		Mn	0.0209097		Mg	3.15271
Cr2O3	0.025		Cr	0.0029574		Fe(iii)	0.545702					Mg	3.15271		Ca	1.91725
Fe2O3	4.84684		Fe(iii)	0.545702		Ti	0.184345					C	5		Na	0.695927
FeO	6.84859		Fe(ii)	0.856898		Cr	0.0029574								K	0.25939
MnO	0.165		Mn	0.0209097		Fe(ii)	0.856898		Mg/(Mg+Fe2+)	0.786289		Ca	1.91725		TOTAL	15.8726
MgO	14.133		Mg	3.15271		Mn	0.0209097		Fe3+/(Fe3++[6]Al)	0.69767		Na	0.0827526
CaO	11.96		Ca	1.91725		Mg	3.15271					B	2
Na2O	2.399		Na	0.695927		Ca	1.91725
K2O	1.359		K	0.25939		Na	0.695927					Na	0.613174
ZrO2	0		Zr	0		K	0.25939					K	0.25939
TOTAL	96.2124		TOTAL	15.8726		TOTAL	15.8726					A	0.872564
MOLECULAR WEIGHTS
SiO2	60.08		*Min. Mag. 1987, vol 51, pp. 431-435
TiO2	79.88		**amp_class
Al2O3	101.96
Cr2O3	151.99
FeO	71.85		Fe(iii)	0.545702
MnO	70.94		2-Ca	0.0827526
MgO	40.3		8-Si	1.94364
CaO	56.08		Al-(8-Si)	0.236476
Na2O	61.98
K2O	94.2
ZrO2	123.22

## Sheet: amph13_point40_job7
		AMPHIBOLE CALCULATION SHEET v1.2
			© Jeremy Preston & John Still, 2001
			© Gabbrosoft 2012
Droop equation No 6*			assuming 13 cations excluding Ca,Na & K
(suitable for many calcic amphiboles)
	Wt%	Mol Prop	At Prop O	No anions		Formula	Normalised form.
SiO2	40.715	0.67768	1.35536	12.2486	Si	6.12431	6.03804
TiO2	1.562	0.0195543	0.0391087	0.353432	Ti	0.176716	0.174227
Al2O3	12.534	0.122931	0.368792	3.33283	Al	2.22189	2.19059
Cr2O3	0.014	9.21113e-05	0.000276334	0.00249728	Cr	0.00166485	0.0016414
FeO	13.196	0.18366	0.18366	1.65977	Fe(ii)	1.65977	1.63639
MnO	0.217	0.00305892	0.00305892	0.027644	Mn	0.027644	0.0272546
MgO	13.261	0.329057	0.329057	2.97375	Mg	2.97375	2.93186
CaO	11.969	0.213427	0.213427	1.92878	Ca	1.92878	1.90161
Na2O	2.445	0.0394482	0.0394482	0.3565	Na	0.713001	0.702957
K2O	1.211	0.0128556	0.0128556	0.116179	K	0.232357	0.229084								For classiftcation spread sheet**
ZrO2	0	0	0	0	Zr	0	0					Si	6.03804		Si	6.03804
TOTAL	97.124		2.54504		TOTAL	16.0599	15.8337					Al (iv)	1.96196		Al	1.96196
												T	8
			No Oxyg	23											Al	0.228631
			T2	9.03717				Cation total ex. Ca,Na&K - (S)		13.1857		Al (vi)	0.228631		Fe(iii)	0.647976
								T = 13	T/S	0.985914		Ti	0.174227		Ti	0.174227
				Formula		Si	6.03804		Fe(ii)	0.988415		Cr	0.0016414		Cr	0.0016414
SiO2	40.715		Si	6.03804		Al	1.96196		Fe(iii)	0.647976		Fe(iii)	0.647976		Fe(ii)	0.988415
TiO2	1.562		Ti	0.174227					Fe2/(Fe2+Fe3)	0.604021		Fe(ii)	0.988415		Mn	0.0272546
Al2O3	12.534		Al	2.19059		Al	0.228631		Fe3/(Fe3+Fe2)	0.395979		Mn	0.0272546		Mg	2.93186
Cr2O3	0.014		Cr	0.0016414		Fe(iii)	0.647976					Mg	2.93186		Ca	1.90161
Fe2O3	5.80691		Fe(iii)	0.647976		Ti	0.174227					C	5		Na	0.702957
FeO	7.97067		Fe(ii)	0.988415		Cr	0.0016414								K	0.229084
MnO	0.217		Mn	0.0272546		Fe(ii)	0.988415		Mg/(Mg+Fe2+)	0.747871		Ca	1.90161		TOTAL	15.8337
MgO	13.261		Mg	2.93186		Mn	0.0272546		Fe3+/(Fe3++[6]Al)	0.739187		Na	0.0983907
CaO	11.969		Ca	1.90161		Mg	2.93186					B	2
Na2O	2.445		Na	0.702957		Ca	1.90161
K2O	1.211		K	0.229084		Na	0.702957					Na	0.604566
ZrO2	0		Zr	0		K	0.229084					K	0.229084
TOTAL	97.7056		TOTAL	15.8337		TOTAL	15.8337					A	0.83365
MOLECULAR WEIGHTS
SiO2	60.08		*Min. Mag. 1987, vol 51, pp. 431-435
TiO2	79.88		**amp_class
Al2O3	101.96
Cr2O3	151.99
FeO	71.85		Fe(iii)	0.647976
MnO	70.94		2-Ca	0.0983907
MgO	40.3		8-Si	1.96196
CaO	56.08		Al-(8-Si)	0.228631
Na2O	61.98
K2O	94.2
ZrO2	123.22

## Sheet: amph13_point38_job7
		AMPHIBOLE CALCULATION SHEET v1.2
			© Jeremy Preston & John Still, 2001
			© Gabbrosoft 2012
Droop equation No 6*			assuming 13 cations excluding Ca,Na & K
(suitable for many calcic amphiboles)
	Wt%	Mol Prop	At Prop O	No anions		Formula	Normalised form.
SiO2	40.192	0.668975	1.33795	12.1223	Si	6.06116	5.98762
TiO2	1.626	0.0203555	0.0407111	0.368858	Ti	0.184429	0.182191
Al2O3	12.863	0.126157	0.378472	3.4291	Al	2.28607	2.25833
Cr2O3	0.019	0.000125008	0.000375025	0.00339786	Cr	0.00226524	0.00223776
FeO	12.154	0.169158	0.169158	1.53263	Fe(ii)	1.53263	1.51404
MnO	0.176	0.00248097	0.00248097	0.0224785	Mn	0.0224785	0.0222058
MgO	13.658	0.338908	0.338908	3.07064	Mg	3.07064	3.03338
CaO	12.208	0.217689	0.217689	1.97234	Ca	1.97234	1.94841
Na2O	2.526	0.0407551	0.0407551	0.369256	Na	0.738513	0.729552
K2O	1.133	0.0120276	0.0120276	0.108975	K	0.217949	0.215305								For classiftcation spread sheet**
ZrO2	0	0	0	0	Zr	0	0					Si	5.98762		Si	5.98762
TOTAL	96.555		2.53853		TOTAL	16.0885	15.8933					Al (iv)	2.01238		Al	2.01238
												T	8
			No Oxyg	23											Al	0.245948
			T2	9.06038				Cation total ex. Ca,Na&K - (S)		13.1597		Al (vi)	0.245948		Fe(iii)	0.558129
								T = 13	T/S	0.987867		Ti	0.182191		Ti	0.182191
				Formula		Si	5.98762		Fe(ii)	0.95591		Cr	0.00223776		Cr	0.00223776
SiO2	40.192		Si	5.98762		Al	2.01238		Fe(iii)	0.558129		Fe(iii)	0.558129		Fe(ii)	0.95591
TiO2	1.626		Ti	0.182191					Fe2/(Fe2+Fe3)	0.631364		Fe(ii)	0.95591		Mn	0.0222058
Al2O3	12.863		Al	2.25833		Al	0.245948		Fe3/(Fe3+Fe2)	0.368636		Mn	0.0222058		Mg	3.03338
Cr2O3	0.019		Cr	0.00223776		Fe(iii)	0.558129					Mg	3.03338		Ca	1.94841
Fe2O3	4.97907		Fe(iii)	0.558129		Ti	0.182191					C	5		Na	0.729552
FeO	7.6736		Fe(ii)	0.95591		Cr	0.00223776								K	0.215305
MnO	0.176		Mn	0.0222058		Fe(ii)	0.95591		Mg/(Mg+Fe2+)	0.760381		Ca	1.94841		TOTAL	15.8933
MgO	13.658		Mg	3.03338		Mn	0.0222058		Fe3+/(Fe3++[6]Al)	0.694124		Na	0.0515868
CaO	12.208		Ca	1.94841		Mg	3.03338					B	2
Na2O	2.526		Na	0.729552		Ca	1.94841
K2O	1.133		K	0.215305		Na	0.729552					Na	0.677965
ZrO2	0		Zr	0		K	0.215305					K	0.215305
TOTAL	97.0537		TOTAL	15.8933		TOTAL	15.8933					A	0.89327
MOLECULAR WEIGHTS
SiO2	60.08		*Min. Mag. 1987, vol 51, pp. 431-435
TiO2	79.88		**amp_class
Al2O3	101.96
Cr2O3	151.99
FeO	71.85		Fe(iii)	0.558129
MnO	70.94		2-Ca	0.0515868
MgO	40.3		8-Si	2.01238
CaO	56.08		Al-(8-Si)	0.245948
Na2O	61.98
K2O	94.2
ZrO2	123.22

[truncated: 10 more sheets: amph13_point37_job7, amph13_point31_job7, amph13_point30_job7, amph13_point29_job7, amph13_point28_job7, amph13_point2_job7, amph13_point1_job7, amph13_point19, amph13_point18, Sheet1]
