# Supplementary material for: The Petrology & Geochemistry of REE-Enriched, Alkaline Vol-Canic Rocks of Ambitle Island, Feni Island Group, Papua New Guinea
Source: Preprints.org preprint supplement (doi:10.20944/preprints202306.0971.v1), 2023-06-14
Supplement: Supplementary file 31 [file OLICALC_OPN7_F5.xls]

## Sheet: OLICALC (2)
	OLIVINE CALCULATION SHEET
	© GabbroSoft 2011
	Wt%	Mol Prop	At Prop O	No anions	Formula
SiO2	40.005	0.665862	1.33172	1.98782	Si	0.99391
TiO2	0	0	0	0	Ti	0
Al2O3	0	0	0	0	Al	0
Cr2O3	0.102	0.000671097	0.00201329	0.00300517	Cr	0.00200345
FeO	6.899	0.0960195	0.0960195	0.143325	Fe(ii)	0.143325
MnO	0.058	0.000817592	0.000817592	0.00122039	Mn	0.00122039
MgO	50.186	1.24531	1.24531	1.85883	Mg	1.85883	2.01373
NiO	0.29	0.00388272	0.00388272	0.0057956	Ni	0.0057956
CaO	0.096	0.00171184	0.00171184	0.00255521	Ca	0.00255521
TOTAL	97.636		2.67977		TOTAL	3.00764
			No Oxyg	4
			T2	1.49267
MOLECULAR WEIGHTS
SiO2	60.08				Endmembers
TiO2	79.88				Fo	92.7849
Al2O3	101.96				Fa	7.15417
Cr2O3	151.99				Tp	0.0609167
FeO	71.85
MnO	70.94
MgO	40.3				Liquid Composition
NiO	74.69
CaO	56.08				XFeO(l)/XMgO(l)	0.257016
This spreadsheet is free to use, edit and distribute. All we ask in return if you end
up using the spreadsheet for a thesis or published work, is that you find some way
of referencing our hard work, and providing a link to the GabbroSoft website at
http://www.gabbrosoft.org

## Sheet: OLICALC
	OLIVINE CALCULATION SHEET
	© GabbroSoft 2011
	Wt%	Mol Prop	At Prop O	No anions	Formula
SiO2	38.167	0.63527	1.27054	1.98645	Si	0.993224
TiO2	0.045	0.000563345	0.00112669	0.00176155	Ti	0.000880773
Al2O3	0	0	0	0	Al	0
Cr2O3	0.082	0.000539509	0.00161853	0.00253052	Cr	0.00168701
FeO	23.022	0.320418	0.320418	0.500963	Fe(ii)	0.500963
MnO	0.356	0.00501833	0.00501833	0.007846	Mn	0.007846
MgO	38.599	0.957792	0.957792	1.49748	Mg	1.49748	2.0147
NiO	0.142	0.00190119	0.00190119	0.00297245	Ni	0.00297245
CaO	0.103	0.00183666	0.00183666	0.00287156	Ca	0.00287156
TOTAL	100.516		2.55841		TOTAL	3.00792
			No Oxyg	4
			T2	1.56347
MOLECULAR WEIGHTS
SiO2	60.08				Endmembers
TiO2	79.88				Fo	74.6393
Al2O3	101.96				Fa	24.9697
Cr2O3	151.99				Tp	0.391071
FeO	71.85
MnO	70.94
MgO	40.3				Liquid Composition
NiO	74.69
CaO	56.08				XFeO(l)/XMgO(l)	1.11513
This spreadsheet is free to use, edit and distribute. All we ask in return if you end
up using the spreadsheet for a thesis or published work, is that you find some way
of referencing our hard work, and providing a link to the GabbroSoft website at
http://www.gabbrosoft.org
