# Supplementary material for: The Petrology & Geochemistry of REE-Enriched, Alkaline Vol-Canic Rocks of Ambitle Island, Feni Island Group, Papua New Guinea
Source: Preprints.org preprint supplement (doi:10.20944/preprints202306.0971.v1), 2023-06-14
Supplement: Supplementary file 32 [file OPN3_PYXCALC.xls]

## Sheet: PYXCALCS
	PYROXENE CALCULATION SHEET
	© GabbroSoft 2011
	Wt%	Mol Prop	At Prop O	No anions	Formula		Normalised
SiO2	48.115	0.800849	1.6017	3.65997	Si	1.82999	1.80032
TiO2	0.828	0.0103655	0.0207311	0.0473718	Ti	0.0236859	0.0233019
Al2O3	4.225	0.0414378	0.124313	0.284063	Al	0.189376	0.186306
Cr2O3	0.018	0.000118429	0.000355287	0.00081185	Cr	0.000541234	0.00053246
FeO	6.724	0.0935839	0.0935839	0.213845	Fe(ii)	0.213845	0.210378
MnO	0.159	0.00224133	0.00224133	0.00512157	Mn	0.00512157	0.00503855
MgO	14.032	0.348189	0.348189	0.795631	Mg	0.795631	0.782734
CaO	24.018	0.428281	0.428281	0.978647	Ca	0.978647	0.962784
Na2O	0.391	0.00630849	0.00630849	0.0144153	Na	0.0288305	0.0283632
K2O	0.005	5.30786e-05	5.30786e-05	0.000121288	K	0.000242575	0.000238643
TOTAL	98.515		2.62575		TOTAL	4.06591	4		T/S	0.983791
			No Oxyg	6
			T2	2.28506
SiO2	48.115		Si	1.82999		Fe(ii)	0.0158647
TiO2	0.828		Al	0.170014		Fe(iii)	0.194513
Al2O3	4.225					Fe2/(Fe2+Fe3)	0.0754106
Cr2O3	0.018		Al	0.0193617		Fe3/(Fe3+Fe2)	0.924589
Fe2O3	6.90888		Fe(iii)	0.194513
FeO	0.507061		Cr	0.000541234
MnO	0.159		Ti	0.0236859
MgO	14.032		Fe(ii)	0.0158647		Wo	48.4813		Wo	49.1837
CaO	24.018		Mn	0.00512157		En	39.4148		En	39.9859
Na2O	0.391		Mg	0.795631		Fs	10.6757		Fs	10.8303
K2O	0.005		Ca	0.978647		Ac	1.42824
TOTAL	99.2069		Na	0.0288305
			K	0.000242575
			TOTAL	4.06244
MOLECULAR WEIGHTS
SiO2	60.08
TiO2	79.88
Al2O3	101.96
Cr2O3	151.99
FeO	71.85
MnO	70.94
MgO	40.3
CaO	56.08
Na2O	61.98
K2O	94.2
This spreadsheet is free to use, edit and distribute. All we ask in return if you end
up using the spreadsheet for a thesis or published work, is that you find some way
of referencing our hard work, and providing a link to the GabbroSoft website at
http://www.gabbrosoft.org

## Sheet: OPN3 analysis
Sample	OPN3	OPN3	OPN3	OPN3	OPN3	OPN8B	OPN8B	OPN8B	OPN8B	OPN3	OPN3							PYXCALCS is a spreadsheet available on the Gabbrosoft website at https://www.gabbrosoft.org/spreadsheets/. It used on pyroxene compositional data to calculate Wo-En-Fs endmembers, and FeO and Fe2O3 from FeO*.
Job	op08	op08	op08	op08	op08	op08	op08	op08	op08	op08	op08
Point	23	24	25	26	27	1	2	3	4	31	32
Grain	Rim	Rim	Rim	Core	Core	Rim1	Rim2	Rim3	Core
SiO2	47.94	47.29	49.74	49.74	49.72	50.013	49.642	47.743	48.115	45.887	45.716
TiO2	1.03	0.87	0.54	0.55	0.46	0.705	0.639	0.968	0.828	1.112	1.187
Al2O3	6.33	6.03	3.55	3.24	3.47	3.693	3.795	4.726	4.225	7.04	6.489
Cr2O3	0	0	0.02	0	0	0	0.024	0.042	0.018	0	0.027
FeO	7.59	7.4	6.26	6.04	5.92	6.51	6.059	7.106	6.724	7.159	6.989
MnO	0.32	0.15	0.14	0.14	0.1	0.253	0.138	0.081	0.159	0.193	0.288
MgO	12.52	12.75	14.29	14.57	14.84	14.287	14.439	13.836	14.032	11.694	11.902
CaO	23.71	24.15	24.33	24.24	24.27	23.317	24.174	23.933	24.018	23.588	23.251
Na2O	0.6	0.46	0.36	0.4	0.39	0.538	0.409	0.454	0.391	0.478	0.613
K2O	0.01	0	0	0	0.02	0.005	0.011	0.005	0	0	0.033
NiO	0	0.04	0.01	0	0	0.028	0.02	0	0	0	0.027
Total	100.05	99.14	99.24	98.92	99.19	99.349	99.35	98.894	98.51	97.151	96.522
Wo%	50.2006	50.6328	49.4994	49.1904	48.9767	48.1512	49.2892	49.1429	49.1837	51.8071	51.1957
En%	36.888	37.1987	40.4569	41.1444	41.6732	41.0561	40.9679	39.5346	39.9859	35.7408	36.4682
Fs%	12.9114	12.1685	10.0437	9.66523	9.35007	10.7927	9.74289	11.3226	10.8303	12.4521	12.3361
Wo	49.0725	49.7643	48.8519	48.4783	48.289	47.2022	48.5565	48.3276	48.4813	50.8412	49.975
En	36.059	36.5606	39.9277	40.5487	41.088	40.247	40.3588	38.8787	39.4148	35.0745	35.5987
Fs	12.6212	11.9597	9.91228	9.52531	9.21877	10.58	9.59805	11.1347	10.6757	12.2199	12.042
Ac	2.24721	1.71532	1.30806	1.44764	1.4042	1.97087	1.48665	1.65898	1.42824	1.8644	2.38429
