# Supplementary material for: The Petrology & Geochemistry of REE-Enriched, Alkaline Vol-Canic Rocks of Ambitle Island, Feni Island Group, Papua New Guinea
Source: Preprints.org preprint supplement (doi:10.20944/preprints202306.0971.v1), 2023-06-14
Supplement: Supplementary file 33 [file OPN3_cpx_formula.v2.xls]

## Sheet: Recalculations
Recalculation of a pyroxene anlaysis (all Fe as FeO) and solving for Fe+3
This will also work for other minerals like garnet with fixed total cations, if the number of oxygens per formula is adjusted.
Replace the red analysis with your data
The sample analysis is an omphacite from a California eclogite (DHZ, 1963, v.2, p.156, #2)
Oxygens per formula =		6		Cations per formula =		4						Sample	OPN3	OPN3	OPN3	OPN3	OPN3
												Point	23	24	25	26	27
			Mole	Cation	Normaliz.	Oxygen	Atom					Grain	Rim	Rim	Rim	Core	Core
Oxide	GFW	Wt.%	Units	Units	Cat Units	Units	Units					SiO2	47.94	47.29	49.74	49.74	49.72
												TiO2	1.03	0.87	0.54	0.55	0.46
SiO2	60.084	47.94	0.797883	0.797883	1.77492	3.54984	1.77492	Si		47.94		Al2O3	6.33	6.03	3.55	3.24	3.47
TiO2	79.866	1.03	0.0128966	0.0128966	0.028689	0.057378	0.028689	Ti		1.03		Cr2O3	0	0	0.02	0	0
Al2O3	101.961	6.33	0.0620826	0.124165	0.27621	0.414315	0.27621	Al		6.33		FeO	7.59	7.4	6.26	6.04	5.92
Fe2O3	159.688	0					0.160111	Fe+3		0		MnO	0.32	0.15	0.14	0.14	0.1
Cr2O3	151.99	0	0	0	0	0	0	Cr+3		0		MgO	12.52	12.75	14.29	14.57	14.84
FeO	71.844	7.59	0.105646	0.105646	0.235013	0.235013	0.0749012	Fe+2		7.59		CaO	23.71	24.15	24.33	24.24	24.27
MnO	70.937	0.32	0.00451105	0.00451105	0.010035	0.010035	0.010035	Mn		0.32		Na2O	0.6	0.46	0.36	0.4	0.39
MgO	40.304	12.52	0.310639	0.310639	0.691029	0.691029	0.691029	Mg		12.52		K2O	0.01	0	0	0	0.02
CaO	56.077	23.71	0.422811	0.422811	0.940561	0.940561	0.940561	Ca		23.71		NiO	0	0.04	0.01	0	0
Na2O	61.979	0.6	0.0096807	0.0193614	0.0430702	0.0215351	0.0430702	Na		0.6
K2O	94.196	0.01	0.000106162	0.000212323	0.000472321	0.000236161	0.000472321	K		0.01
H2O	18.015		0	0	0	0	0	H
Totals		100.05	1.72626	1.79813	4	5.91994	4
						Sum Si =	1.77492
						Sum Al =	2.07982		The "Sum" values are summations of the column of "Atom Units"
						Sum Mg =	3.0159		down to the element listed. For example, "Sum Mg" would be the
						Sum Ca =	3.95646		sum of the "Atom Units" for Si, Ti, Al, Fe+3, Fe+2, Mn, and Mg.
						Sum Na =	3.99953		The choice of "Sums" is based on cation sizes and site occupancies.
						Sum K =	4
End Member Calculations									Cation Site Occupancy			Ideal
			If Na>Fe+3 p.f.u.					C.N.	Site	Elements	Atoms p.f.u.	Cations/Site
Ortho and Calcic CPX			Sodic and-Calcic CPX					4	Tet	Si+Ti	1.80361	2
Wo	55.1167		Aegerine	16.2776				4	Tet	Al	0.19639
En	40.4941		Jadeite	-11.8989				6	Oct	Al	0.0798206	1
Fs	4.3892		Diopside	95.6213				6	Oct	Fe+3 +Cr +Fe+2 +Mn	0.245048
	100			100				6	Oct	Mg	0.675132
								8	Cubic	Mg	0.015897	1
								8	Cubic	Ca	0.940561
								8	Cubic	Na	0.0430702
											3.99953
