# Supplementary material for: The Petrology & Geochemistry of REE-Enriched, Alkaline Vol-Canic Rocks of Ambitle Island, Feni Island Group, Papua New Guinea
Source: Preprints.org preprint supplement (doi:10.20944/preprints202306.0971.v1), 2023-06-14
Supplement: Supplementary file 34 [file OPN7_Basalt_OlivinePlots.xlsx]

## Sheet: Sheet1
Sample	OPN7	OPN7	OPN7	OPN7	OPN7	OPN7	OPN7	OPN7	OPN7	F5	F5	F5	F5						OPN7	OPN7	OPN7	OPN7	OPN7	OPN7	F5	F5	F5	F5
Job	emc02	emc02	emc02	emc02	emc02	emc02	emc02	emc02	emc02	emc01	emc01	emc01	emc01						emc02	emc02	emc02	emc02	emc02	emc02	emc01	emc01	emc01	emc01
Point	12	13	14	59	25	34	36	42	48	17	18	19	20							25	34	36	42	48	17	18	19	20
SiO2 wt%	40.01	41.86	39.88	41.3	39.712	40.564	40.793	41.095	40.686	39.622	39.689	38.959	39.298						SiO2	39.712	40.564	40.793	41.095	40.686	39.622	39.689	38.959	39.298
Cr2O3 wt%	0.1	0.06	0	0.07	0.033	0.015	0.051	0.028	0.051	0.042	0	0	0.009						TiO2	0	0.025	0	0	0	0	0	0	0.021
FeO wt%	6.9	7	10.78	6.79	11.647	8.449	8.992	7.792	8.109	15.074	14.959	16.016	15.151						Al2O3	0.014	0.016	0.034	0	0.023	0	0.016	0.013	0
MnO wt%	0.06	0.1	0.55	0.14	0.488	0.093	0.331	0.197	0.063	0.239	0.361	0.323	0.297						Cr2O3	0.033	0.015	0.051	0.028	0.051	0.042	0	0	0.009
MgO wt%	50.19	50.42	45.58	51.63	46.763	50.699	49.731	50.809	50.261	45.303	44.999	43.564	44.853						FeO	11.647	8.449	8.992	7.792	8.109	15.074	14.959	16.016	15.151
CaO wt%	0.1	0.07	0.3	0.06	0.316	0.057	0.247	0.221	0.055	0.275	0.278	0.327	0.353						MnO	0.488	0.093	0.331	0.197	0.063	0.239	0.361	0.323	0.297
NiO wt%	0.29	0.27	0.1	0.32	0.079	0.334	0.203	0.244	0.36	0.084	0.087	0.035	0.082						MgO	46.763	50.699	49.731	50.809	50.261	45.303	44.999	43.564	44.853
Total	97.64	99.79	97.2	100.32	99.052	100.252	100.382	100.386	99.669	100.639	100.412	99.269	100.064						CaO	0.316	0.057	0.247	0.221	0.055	0.275	0.278	0.327	0.353
Ni (ppm)	2278.82	2145.23	777.942	2545.99	620.782	2624.57	1595.17	1917.35	2828.88	660.072	683.646	275.03	644.356						Na2O	0	0	0	0	0.029	0	0.014	0	0
Mg#	0.928407	0.927743	0.882848	0.931263	0.877405	0.914494	0.907894	0.920769	0.91699	0.842697	0.842817	0.829016	0.840681						K2O	0	0	0	0	0.032	0	0.009	0.032	0
Mg#_OP	92.8407	92.7743	88.2848	93.1263	87.7405	91.4494	90.7894	92.0769	91.699	84.2697	84.2817	82.9016	84.0681
Te (mole%)	0.061	0	0.601296	0.11	0.515354	0.0951509	0.34106	0.201853	0.0652171	0.251036	0.381274	0.346476	0.313801						NiO	0.079	0.334	0.203	0.244	0.36	0.084	0.087	0.035	0.082
Fo (mole%)	92.6	93.8	87.4	94.02	86.9183	91.296	90.1889	91.6288	91.5746	83.7508	83.6481	82.2471	83.4089						Total	99.052	100.252	100.382	100.386	99.669	100.639	100.412	99.269	100.064
Fa (mole%)	7.146	6.105	11.5952	5.8	12.1442	8.53504	9.14808	7.88293	8.28817	15.6328	15.5992	16.9627	15.8055
Ca-Ol (mole%)	0.127	0.079	0.414751	0.071	0.422129	0.0737694	0.321938	0.286439	0.0720204	0.365379	0.371404	0.4437	0.471785
Larnite	0.127	0.079	0.414751	0.071	0.422129	0.0737694	0.321938	0.286439	0.0720204	0.365379	0.371404	0.4437	0.471785
Forsterite	92.6	93.8	87.4	94.02	86.9183	91.296	90.1889	91.6288	91.5746	83.7508	83.6481	82.2471	83.4089
Fay + Teph	7.207	6.105	12.1965	5.91	12.6596	8.63019	9.48914	8.08478	8.35339	15.8839	15.9805	17.3092	16.1193
Total	99.934	99.984	100.011	100.001	100	100	100	100	100	100	100	100	100
TernaryPlot.com - Make ternary plots easily online, no set-up required
