# Supplementary material for: The Petrology & Geochemistry of REE-Enriched, Alkaline Vol-Canic Rocks of Ambitle Island, Feni Island Group, Papua New Guinea
Source: Preprints.org preprint supplement (doi:10.20944/preprints202306.0971.v1), 2023-06-14
Supplement: Supplementary file 36 [file cpx_formula.v2.xls]

## Sheet: Recalculations
Recalculation of a pyroxene anlaysis (all Fe as FeO) and solving for Fe+3
This will also work for other minerals like garnet with fixed total cations, if the number of oxygens per formula is adjusted.
Replace the red analysis with your data
The sample analysis is an omphacite from a California eclogite (DHZ, 1963, v.2, p.156, #2)
Oxygens per formula =		6		Cations per formula =		4
			Mole	Cation	Normaliz.	Oxygen	Atom
Oxide	GFW	Wt.%	Units	Units	Cat Units	Units	Units
SiO2	60.084	53.31	0.887258	0.887258	1.91878	3.83756	1.91878	Si
TiO2	79.866	0.26	0.00325545	0.00325545	0.00704022	0.0140804	0.00704022	Ti
Al2O3	101.961	10.52	0.103177	0.206353	0.446258	0.669388	0.446258	Al
Fe2O3	159.688	0					0.120723	Fe+3
Cr2O3	151.99	0	0	0	0	0	0	Cr+3
FeO	71.844	6.538	0.0910027	0.0910027	0.196802	0.196802	0.0760785	Fe+2
MnO	70.937	0.05	0.000704851	0.000704851	0.00152431	0.00152431	0.00152431	Mn
MgO	40.304	8.42	0.208912	0.208912	0.451792	0.451792	0.451792	Mg
CaO	56.077	14.5	0.258573	0.258573	0.559188	0.559188	0.559188	Ca
Na2O	61.979	5.9	0.0951935	0.190387	0.41173	0.205865	0.41173	Na
K2O	94.196	0.15	0.00159242	0.00318485	0.00688753	0.00344377	0.00688753	K
H2O	18.015		0	0	0	0	0	H
Totals		99.648	1.64967	1.84963	4	5.93964	4
						Sum Si =	1.91878
						Sum Al =	2.37208		The "Sum" values are summations of the column of "Atom Units"
						Sum Mg =	3.02219		down to the element listed. For example, "Sum Mg" would be the
						Sum Ca =	3.58138		sum of the "Atom Units" for Si, Ti, Al, Fe+3, Fe+2, Mn, and Mg.
						Sum Na =	3.99311		The choice of "Sums" is based on cation sizes and site occupancies.
						Sum K =	4
End Member Calculations									Cation Site Occupancy			Ideal
			If Na>Fe+3 p.f.u.					C.N.	Site	Elements	Atoms p.f.u.	Cations/Site
Ortho and Calcic CPX			Sodic and-Calcic CPX					4	Tet	Si+Ti	1.92582	2
Wo	51.4405		Aegerine	12.4339				4	Tet	Al	0.0741822
En	41.561		Jadeite	29.9723				6	Oct	Al	0.372076	1
Fs	6.99857		Diopside	57.5938				6	Oct	Fe+3 +Cr +Fe+2 +Mn	0.198326
	100			100				6	Oct	Mg	0.429598
								8	Cubic	Mg	0.0221945	1
								8	Cubic	Ca	0.559188
								8	Cubic	Na	0.41173
											3.99311
