# Supplementary material for: The Petrology & Geochemistry of REE-Enriched, Alkaline Vol-Canic Rocks of Ambitle Island, Feni Island Group, Papua New Guinea
Source: Preprints.org preprint supplement (doi:10.20944/preprints202306.0971.v1), 2023-06-14
Supplement: Supplementary file 37 [file mica_forumlas_F12.xls]

## Sheet: Recalculations
Recalculation of an EDS/WDS mica analysis using stoichiometry to place limits on Fe+3
Enter the analysis (wt% of the oxides) by replacing the red numbers.
The analysis already present is from DHZ (v.3, p.18, muscovite #13.)
Oxygens per formula =		11
			Mole	Oxygen	Normaliz.	Atom
Oxide	GFW	Wt.%	Units	Units	Ox Units	Units
SiO2	60.084	38.57	0.641935	1.28387	5.80151	2.90075	Si	Fe+3		Sum K	Oxygens
TiO2	79.866	2.89	0.0361856	0.0723712	0.327029	0.163514	Ti	0.780171	All Ferric	7.66288	12
Al2O3	101.961	11.41	0.111906	0.335717	1.51703	1.01135	Al	0	Sum Si=3	8.21643	12.3764
Fe2O3	159.688					0	Fe+3	0.701775	Sum Mg=6	6.89288	10.8947
FeO	71.844	12.86	0.178999	0.178999	0.808855	0.808855	Fe+2	0	Sum Si=4	9.21643	14.3764
MnO	70.937	0.15	0.00211455	0.00211455	0.00955517	0.00955517	Mn	1.19077	Sum Al=6	11.6958	17.1939
MgO	40.304	18.03	0.44735	0.44735	2.02147	2.02147	Mg	0	All Ferrous	7.94462	12
CaO	56.077	0	0	0	0	0	Ca	0.622464	A-Site full	7.71983	12
Na2O	61.979	0.82	0.0132303	0.0132303	0.0597846	0.119569	Na	0	Sum Mg=7	8.04169	12.1344
K2O	94.196	9.48	0.100641	0.100641	0.454774	0.909548	K
H2O	18.015					2	H			Should be	Should be
										6 to 8	12
Totals		94.21	1.53236	2.43429	11	9.94462
					Sum Si =	2.90075
					Sum Al =	4.07562		The "Sum" values are summations of the column of "Atom Units"
					Sum Mg =	6.9155		down to the element listed. For example, "Sum Mg" would be the
Fe+3 lower bound		All Ferrous Iron			Sum Ca =	6.9155		sum of the "Atom Units" for Si, Ti, Al, Fe+3, Fe+2, Mn, and Mg.
					Sum Na =	7.03507		The choice of "Sums" is based on cation sizes and site occupancies.
					Sum K =	7.94462
Oxygens per formula =		11
		FeO only	Fe2O3 only	Mole	Oxygen	Normaliz.	Atom
Oxide	GFW	Wt.%	Wt.%	Units	Units	Ox Units	Units
									Wt% Fe2O3 = Wt%FeO*159.692/(2*71.846) = Wt%FeO*(1.111349275)
SiO2	60.084	38.57	38.57	0.641935	1.28387	5.59577	2.79789	Si
TiO2	79.866	2.89	2.89	0.0361856	0.0723712	0.315432	0.157716	Ti	Mole#Fe2O3 = Wt%Fe2O3/159.692 = Wt%FeO/(2*71.846)
Al2O3	101.961	11.41	11.41	0.111906	0.335717	1.46323	0.975485	Al
Fe2O3	159.688		14.292	0.0894995	0.268498	1.17026	0.780171	Fe+3
FeO	71.844	12.86					0	Fe+2
MnO	70.937	0.15	0.15	0.00211455	0.00211455	0.00921632	0.00921632	Mn
MgO	40.304	18.03	18.03	0.44735	0.44735	1.94979	1.94979	Mg
CaO	56.077	0	0	0	0	0	0	Ca
Na2O	61.979	0.82	0.82	0.0132303	0.0132303	0.0576645	0.115329	Na
K2O	94.196	9.48	9.48	0.100641	0.100641	0.438647	0.877294	K
H2O	18.015						2	H
Totals		94.21	95.642	1.44286	2.52379	11	9.66288
						Sum Si =	2.79789
						Sum Al =	3.93109
						Sum Mg =	6.67026
Fe+3 upper bound		All Ferric Iron				Sum Ca =	6.67026
						Sum Na =	6.72792
						Sum K =	7.66288
Oxygens per formula =		11		Cations per formula =		3			Final
									Oxygen
			Mole	Cation	Normaliz.	Oxygen	Atom		Units
Oxide	GFW	Wt.%	Units	Units	Cat Units	Units	Units
SiO2	60.084	38.57	0.641935	0.641935	3	6	3	Si	6
TiO2	79.866	2.89	0.0361856	0.0361856	0.169109	0.338218	0.169109	Ti	0.338218
Al2O3	101.961	11.41	0.111906	0.223811	1.04595	1.56893	1.04595	Al	1.56893
Fe2O3	159.688						0	Fe+3	0
FeO	71.844	12.86	0.178999	0.178999	0.836529	0.836529	0.836529	Fe+2	0.836529
MnO	70.937	0.15	0.00211455	0.00211455	0.00988209	0.00988209	0.00988209	Mn	0.00988209
MgO	40.304	18.03	0.44735	0.44735	2.09063	2.09063	2.09063	Mg	2.09063
CaO	56.077	0	0	0	0	0	0	Ca	0
Na2O	61.979	0.82	0.0132303	0.0264606	0.12366	0.0618301	0.12366	Na	0.0618301
K2O	94.196	9.48	0.100641	0.201282	0.940668	0.470334	0.940668	K	0.470334
H2O	18.015						2	H	1
Totals		94.21	1.53236	0.641935	8.21643	11.3764	10.2164		12.3764
						Sum Si =	3
						Sum Al =	4.21506
Fe+3 lower bound		No phengite component				Sum Mg =	7.15211
						Sum Ca =	7.15211
		Sum Si = 3				Sum Na =	7.27577
						Sum K =	8.21643
Oxygens per formula =		11		Cations per formula =		4
									Final
			Mole	Cation	Normaliz.	Oxygen	Atom		Oxygen
Oxide	GFW	Wt.%	Units	Units	Cat Units	Units	Units		Units
SiO2	60.084	38.57	0.641935	0.641935	4	8	4	Si	8
TiO2	79.866	2.89	0.0361856	0.0361856	0.169109	0.338218	0.169109	Ti	0.338218
Al2O3	101.961	11.41	0.111906	0.223811	1.04595	1.56893	1.04595	Al	1.56893
Fe2O3	159.688						0	Fe+3	0
FeO	71.844	12.86	0.178999	0.178999	0.836529	0.836529	0.836529	Fe+2	0.836529
MnO	70.937	0.15	0.00211455	0.00211455	0.00988209	0.00988209	0.00988209	Mn	0.00988209
MgO	40.304	18.03	0.44735	0.44735	2.09063	2.09063	2.09063	Mg	2.09063
CaO	56.077	0	0	0	0	0	0	Ca	0
Na2O	61.979	0.82	0.0132303	0.0264606	0.12366	0.0618301	0.12366	Na	0.0618301
K2O	94.196	9.48	0.100641	0.201282	0.940668	0.470334	0.940668	K	0.470334
H2O	18.015						2	H	1
Totals		94.21	1.53236	0.641935	9.21643	13.3764	11.2164		14.3764
						Sum Si =	4
						Sum Al =	5.21506
Fe+3 lower bound		Maximum Si (no tetrahedral Al)				Sum Mg =	8.15211
						Sum Ca =	8.15211
		Sum Si = 4				Sum Na =	8.27577
						Sum K =	9.21643
Oxygens per formula =		11		Cations per formula =		6
									Final
			Mole	Cation	Normaliz.	Oxygen	Atom		Oxygen
Oxide	GFW	Wt.%	Units	Units	Cat Units	Units	Units		Units
SiO2	60.084	38.57	0.641935	0.641935	4.2704	8.5408	4.2704	Si	8.5408
TiO2	79.866	2.89	0.0361856	0.0361856	0.240721	0.481442	0.240721	Ti	0.481442
Al2O3	101.961	11.41	0.111906	0.223811	1.48888	2.23332	1.48888	Al	2.23332
Fe2O3	159.688						0	Fe+3	0
FeO	71.844	12.86	0.178999	0.178999	1.19077	1.19077	1.19077	Fe+2	1.19077
MnO	70.937	0.15	0.00211455	0.00211455	0.0140668	0.0140668	0.0140668	Mn	0.0140668
MgO	40.304	18.03	0.44735	0.44735	2.97595	2.97595	2.97595	Mg	2.97595
CaO	56.077	0	0	0	0	0	0	Ca	0
Na2O	61.979	0.82	0.0132303	0.0264606	0.176026	0.0880131	0.176026	Na	0.0880131
K2O	94.196	9.48	0.100641	0.201282	1.33901	0.669505	1.33901	K	0.669505
H2O	18.015						2	H	1
Totals		94.21	1.53236	0.901931	11.6958	16.1939	13.6958		17.1939
						Sum Si =	4.2704
						Sum Al =	6
Fe+3 upper bound		Al fills the dioctahdral sites				Sum Mg =	10.1808
						Sum Ca =	10.1808
		Sum Al = 6				Sum Na =	10.3568
						Sum K =	11.6958
Oxygens per formula =		11		Cations per formula =		6
									Final
			Mole	Cation	Normaliz.	Oxygen	Atom		Oxygen
Oxide	GFW	Wt.%	Units	Units	Cat Units	Units	Units		Units
SiO2	60.084	38.57	0.641935	0.641935	2.51674	5.03348	2.51674	Si	5.03348
TiO2	79.866	2.89	0.0361856	0.0361856	0.141868	0.283735	0.141868	Ti	0.283735
Al2O3	101.961	11.41	0.111906	0.223811	0.877464	1.3162	0.877464	Al	1.3162
Fe2O3	159.688						0.701775	Fe+3	1.05266
FeO	71.844	12.86	0.178999	0.178999	0.701775	0.701775	0	Fe+2	0
MnO	70.937	0.15	0.00211455	0.00211455	0.00829022	0.00829022	0.00829022	Mn	0.00829022
MgO	40.304	18.03	0.44735	0.44735	1.75386	1.75386	1.75386	Mg	1.75386
CaO	56.077	0	0	0	0	0	0	Ca	0
Na2O	61.979	0.82	0.0132303	0.0264606	0.10374	0.0518701	0.10374	Na	0.0518701
K2O	94.196	9.48	0.100641	0.201282	0.789139	0.39457	0.789139	K	0.39457
H2O	18.015						2	H	1
Totals		94.21	1.53236	1.53039	6.89288	9.54378	8.89288		10.8947
						Sum Si =	2.51674
						Sum Al =	3.53607
Fe+3 upper bound		No trioctahedral substitutions				Sum Mg =	6
						Sum Ca =	6
		Sum Mg = 6				Sum Na =	6.10374
						Sum K =	6.89288
Oxygens per formula =		11		Cations per formula =		7
									Final
			Mole	Cation	Normaliz.	Oxygen	Atom		Oxygen
Oxide	GFW	Wt.%	Units	Units	Cat Units	Units	Units		Units
SiO2	60.084	38.57	0.641935	0.641935	2.9362	5.8724	2.9362	Si	5.8724
TiO2	79.866	2.89	0.0361856	0.0361856	0.165512	0.331025	0.165512	Ti	0.331025
Al2O3	101.961	11.41	0.111906	0.223811	1.02371	1.53556	1.02371	Al	1.53556
Fe2O3	159.688						0	Fe+3	0
FeO	71.844	12.86	0.178999	0.178999	0.818738	0.818738	0.818738	Fe+2	0.818738
MnO	70.937	0.15	0.00211455	0.00211455	0.00967193	0.00967193	0.00967193	Mn	0.00967193
MgO	40.304	18.03	0.44735	0.44735	2.04617	2.04617	2.04617	Mg	2.04617
CaO	56.077	0	0	0	0	0	0	Ca	0
Na2O	61.979	0.82	0.0132303	0.0264606	0.12103	0.0605151	0.12103	Na	0.0605151
K2O	94.196	9.48	0.100641	0.201282	0.920662	0.460331	0.920662	K	0.460331
H2O	18.015						2	H	1
Totals		94.21	1.53236	1.53039	8.04169	11.1344	10.0417		12.1344
						Sum Si =	2.9362
Fe+3 lower bound		Octahedral sites full				Sum Al =	4.12542
						Sum Mg =	7
		Sum Mg = 7				Sum Ca =	7
						Sum Na =	7.12103
						Sum K =	8.04169
Oxygens per formula =		11		Cations per formula =		1
									Final
			Mole	Cation	Normaliz.	Oxygen	Atom		Oxygen
Oxide	GFW	Wt.%	Units	Units	Cat Units	Units	Units		Units
SiO2	60.084	38.57	0.641935	0.641935	2.81868	5.63736	2.81868	Si	5.63736
TiO2	79.866	2.89	0.0361856	0.0361856	0.158888	0.317776	0.158888	Ti	0.317776
Al2O3	101.961	11.41	0.111906	0.223811	0.982735	1.4741	0.982735	Al	1.4741
Fe2O3	159.688						0.622464	Fe+3	0.933696
FeO	71.844	12.86	0.178999	0.178999	0.785969	0.785969	0.163505	Fe+2	0.163505
MnO	70.937	0.15	0.00211455	0.00211455	0.00928482	0.00928482	0.00928482	Mn	0.00928482
MgO	40.304	18.03	0.44735	0.44735	1.96428	1.96428	1.96428	Mg	1.96428
CaO	56.077	0	0	0	0	0	0	Ca	0
Na2O	61.979	0.82	0.0132303	0.0264606	0.116186	0.0580931	0.116186	Na	0.0580931
K2O	94.196	9.48	0.100641	0.201282	0.883814	0.441907	0.883814	K	0.441907
H2O	18.015						2	H	1
Totals		94.21	1.53236	0.227743	7.71983	10.6888	9.71983		12
						Sum Si =	2.81868
Fe+3 upper bound		A-site full				Sum Al =	3.9603
						Sum Mg =	6.71983
		K+Na+Ca = 1				Sum Ca =	6.71983
						Sum Na =	6.83602
						Sum K =	7.71983
