# Supplementary material for: The Petrology & Geochemistry of REE-Enriched, Alkaline Vol-Canic Rocks of Ambitle Island, Feni Island Group, Papua New Guinea
Source: Preprints.org preprint supplement (doi:10.20944/preprints202306.0971.v1), 2023-06-14
Supplement: Supplementary file 40 [file op07_Apatite_Mt.xlsx]

## Sheet: op07
Generated from op07r2.TXT by VB Plum system Version 1.09 on 17/12/2010 at 09:40:08								15 kV	32 nA	10 μm
	1	2	3	4	5	6	7	8	9	10	11	12	13	14	15	16	17	18	19	20	21	22	23	24	25	26	27	28	29	30	31	32	33	34	35	36	37	38	39	40	41	42
	++++	++++	++++	++++	++++	++++	++++	++++	++++	++++	++++	++++	++++	++++	++++	++++	++++	++++	++++	++++	++++	++++	++++	++++	++++	++++	++++	++++	++++	++++	++++	++++	++++	++++	++++	++++	++++	++++	++++	++++	++++	++++
	HB	HB	PLAG	Ti-Mt	PLAG	Mt?	Ti-Mt	ZONED PLAG-RIM	PLAG-RIM	PLAG-RIM	PLAG-RIM	PLAG-CORE	PLAG-CORE	PLAG-CORE	PLAG-CORE	HB inclusion in plag	Plag	Zoned Hb	Zoned Hb	Zoned Hb	Zoned Hb	Plag inc in HB	Mt?	Ap	Ap	Ap	Ap	Hb	Hb	Hb	Hb	Plag?	Zoned Plag-RIM	Zoned Plag-RIM	Plag-core	Zoned Plag-RIM	Hb	Hb	Ti-Mt	Hb	Ti-Mt	Hb
SiO2	39.494	39.594	55.94	0	52.24	0.018	0.029	55.424	58.514	57.389	54.675	58.58	57.136	60.126	54.798	37.444	57.824	40.775	40.602	40.178	40.275	63.036	0.036	0.501	0.306	0.197	0.243	40.103	40.416	40.456	40.475	60.95	57.98	55.863	53.63	56.384	40.56	40.192	0.3	40.715	0.134	40.475
TiO2	2.057	2.218	0	3.141	0	0	4.886	0.002	0	0	0	0.034	0	0	0.008	0	0.098	2.26	1.835	1.939	2.124	0	0	0.001	0	0.054	0	1.952	2.318	2.372	2.233	0	0	0.071	0.03	0	2.07	1.626	2.907	1.562	3.958	1.638
Al2O3	12.893	12.663	26.955	2.663	29.087	0	1.677	26.747	25.531	26.382	27.531	25.195	26.077	24.75	27.777	12.015	25.675	12.357	12.958	13.412	12.791	22.197	0	0	0	0	0	13.363	12.018	12.282	12.47	24.114	25.903	26.91	28.539	26.79	12.775	12.863	2.373	12.534	2.855	12.363
Cr2O3	0	0.033	0	0.001	0.024	0	0	0	0	0.002	0.027	0.007	0	0	0	0	0.011	0	0	0.007	0.012	0	0	0.009	0	0.06	0.015	0.034	0	0.021	0	0.049	0	0	0	0	0	0.019	0.081	0.014	0.052	0.025
FeO	14.948	15.16	0.463	84.96	0.416	0.035	84.362	0.471	0.396	0.368	0.542	0.427	0.409	0.445	0.469	10.007	0.397	12.857	11.491	12.214	12.246	1.381	0.083	0.398	0.16	0.105	0.149	12.621	13.353	13.09	13.144	0.549	0.371	0.403	0.46	0.433	11.447	12.154	83.809	13.196	83.747	11.21
MnO	0.337	0.385	0	1.673	0	0	1.859	0	0.028	0.019	0.005	0.004	0	0.032	0.035	0.76	0.042	0.281	0.117	0.16	0.222	0.075	0	0.082	0.068	0.066	0.142	0.265	0.381	0.254	0.302	0.012	0	0	0.02	0	0.167	0.176	1.205	0.217	0.932	0.165
MgO	11.652	11.533	0	0.765	0.035	0	0.929	0.033	0.02	0	0.086	0.058	0.016	0.01	0	20.566	0	13.182	14.483	13.579	13.449	1.66	0	0.14	0.086	0.031	0.074	12.878	12.729	12.805	12.758	0.032	0.017	0.027	0.028	0	14.2	13.658	0.654	13.261	2.824	14.133
CaO	11.898	12.078	9.255	0.082	12.355	0	0	9.373	7.847	8.422	10.247	7.501	8.491	6.699	10.581	0.924	8.011	12.078	12.273	12.286	12.177	3.354	0.043	54.231	54.446	53.037	53.193	12.241	11.852	12.152	11.99	5.891	8.011	9.398	11.271	9.197	12.309	12.208	0.054	11.969	0	11.96
Na2O	2.473	2.397	5.754	0	4.295	0	0.091	5.661	6.424	6.2	5.271	6.805	6.124	7.001	5.177	0.059	6.492	2.596	2.726	2.64	2.747	5.043	0.003	0.091	0.059	0	0.034	2.665	2.635	2.584	2.637	7.742	6.451	5.7	4.855	5.787	2.243	2.526	0	2.445	0.044	2.399
K2O	1.774	1.807	0.584	0	0.274	0	0	0.522	0.797	0.673	0.444	0.814	0.688	1.014	0.311	0.251	0.747	1.401	1.284	1.229	1.286	0.974	0.006	0.011	0.006	0.004	0	1.241	1.458	1.522	1.574	0.579	0.757	0.557	0.293	0.563	1.575	1.133	0	1.211	0.013	1.359
NiO	0.011	0	0.02	0	0	0	0.017	0.01	0.012	0	0	0.02	0	0.009	0	0	0	0	0.036	0.01	0.011	0.011	0.016	0.04	0	0.043	0	0	0	0	0	0.012	0	0	0.035	0	0.035	0.045	0.041	0.006	0	0
Total	97.537	97.868	98.972	93.283	98.726	0.053	93.85	98.244	99.568	99.454	98.828	99.446	98.941	100.086	99.156	82.026	99.297	97.787	97.805	97.656	97.34	97.73	0.187	55.504	55.132	53.599	53.849	97.361	97.16	97.539	97.583	99.93	99.49	98.93	99.162	99.154	97.38	96.602	91.425	97.13	94.559	95.728
O	10	10	10	10	10	10	10	10	10	10	10	10	10	10	10	10	10	10	10	10	10	10	10	10	10	10	10	10	10	10	10	10	10	10	10	10	10	10	10	10	10	10
Si	2.6099	2.6123	3.1818	0	3.0038	2.7577	0.0035	3.1769	3.2927	3.2384	3.124	3.3024	3.2424	3.3582	3.1189	2.733	3.2683	2.6514	2.6226	2.6072	2.6256	3.5389	1.7454	0.0838	0.0516	0.0343	0.0419	2.6164	2.6552	2.6447	2.6449	3.3992	3.2681	3.1787	3.0609	3.1978	2.6321	2.6345	0.0368	2.6625	0.0155	2.6647
Ti	0.1022	0.1101	0	0.2841	0	0	0.4375	0.0001	0	0	0	0.0015	0	0	0.0003	0	0.0042	0.1105	0.0891	0.0947	0.1041	0	0	0.0001	0	0.0071	0	0.0958	0.1145	0.1166	0.1097	0	0	0.0031	0.0013	0	0.101	0.0802	0.2685	0.0768	0.3444	0.0811
Al	1.0043	0.9848	1.8072	0.3775	1.9714	0	0.2353	1.8071	1.6935	1.7548	1.8542	1.6742	1.7443	1.6294	1.8635	1.0336	1.7105	0.9471	0.9866	1.0259	0.9829	1.4689	0	0	0	0	0	1.0276	0.9306	0.9464	0.9605	1.5851	1.7209	1.8049	1.92	1.7909	0.9771	0.9938	0.3435	0.9661	0.3894	0.9594
Cr	0	0.0017	0	0.0001	0.0011	0	0	0	0	0.0001	0.0012	0.0003	0	0	0	0	0.0005	0	0	0.0004	0.0006	0	0	0.0012	0	0.0083	0.0021	0.0018	0	0.0011	0	0.0022	0	0	0	0	0	0.001	0.0078	0.0007	0.0048	0.0013
Fe2	0.8262	0.8365	0.022	8.5471	0.02	4.4846	8.4005	0.0226	0.0186	0.0173	0.0259	0.0201	0.0194	0.0208	0.0223	0.6108	0.0188	0.6992	0.6207	0.6628	0.6677	0.0648	3.3249	0.0556	0.0226	0.0152	0.0215	0.6886	0.7336	0.7157	0.7183	0.0256	0.0175	0.0192	0.022	0.0205	0.6212	0.6663	8.6062	0.7217	8.1046	0.6172
Mn	0.0189	0.0215	0	0.1704	0	0	0.1875	0	0.0013	0.0009	0.0002	0.0002	0	0.0015	0.0017	0.047	0.002	0.0155	0.0064	0.0088	0.0122	0.0035	0	0.0115	0.0098	0.0098	0.0208	0.0146	0.0212	0.0141	0.0167	0.0006	0	0	0.001	0	0.0092	0.0098	0.1254	0.012	0.0914	0.0092
Mg	1.1479	1.1343	0	0.1372	0.003	0	0.165	0.0028	0.0017	0	0.0073	0.0049	0.0014	0.0008	0	2.2376	0	1.2777	1.3945	1.3136	1.3071	0.1389	0	0.0349	0.0215	0.0081	0.0189	1.2524	1.2466	1.2479	1.2427	0.0027	0.0014	0.0023	0.0024	0	1.3736	1.3346	0.1196	1.2927	0.4871	1.387
Ca	0.8425	0.8538	0.5641	0.0105	0.7612	0	0	0.5757	0.4731	0.5092	0.6274	0.4531	0.5163	0.4009	0.6453	0.0723	0.4851	0.8415	0.8495	0.8543	0.8506	0.2018	2.2338	9.7072	9.8326	9.8653	9.8461	0.8557	0.8343	0.8512	0.8395	0.352	0.4838	0.573	0.6893	0.5589	0.8559	0.8574	0.0072	0.8387	0	0.8437
Na	0.3169	0.3066	0.6346	0	0.4788	0	0.0209	0.6292	0.7009	0.6784	0.5839	0.7439	0.6738	0.7582	0.5713	0.0084	0.7115	0.3273	0.3414	0.3322	0.3473	0.549	0.282	0.0294	0.0194	0	0.0115	0.3371	0.3357	0.3275	0.3342	0.8372	0.705	0.6289	0.5373	0.6364	0.2822	0.321	0	0.31	0.0099	0.3062
K	0.1496	0.1521	0.0424	0	0.0201	0	0	0.0381	0.0572	0.0484	0.0324	0.0585	0.0498	0.0723	0.0226	0.0233	0.0539	0.1162	0.1058	0.1017	0.107	0.0697	0.3711	0.0024	0.0013	0.0009	0	0.1033	0.1222	0.1269	0.1312	0.0412	0.0545	0.0404	0.0213	0.0407	0.1304	0.0947	0	0.1011	0.0019	0.1142
Ni	0.0006	0	0.0009	0	0	0	0.0016	0.0005	0.0005	0	0	0.0009	0	0.0004	0	0	0	0	0.0019	0.0005	0.0006	0.0005	0.6239	0.0054	0	0.006	0	0	0	0	0	0.0005	0	0	0.0016	0	0.0018	0.0024	0.0041	0.0003	0	0
Total	7.0189	7.0137	6.2531	9.5271	6.2594	7.2423	9.4518	6.2531	6.2396	6.2476	6.2565	6.2601	6.2473	6.2424	6.246	6.7661	6.2548	6.9863	7.0186	7.002	7.0056	6.036	8.5812	9.9314	9.9588	9.9549	9.9628	6.9933	6.994	6.9921	6.9978	6.2463	6.2512	6.2504	6.2571	6.2453	6.9846	6.9957	9.519	6.9828	9.449	6.984
O	10	10	10	10	10	10	10	10	10	10	10	10	10	10	10	10	10	10	10	10	10	10	10	10	10	10	10	10	10	10	10	10	10	10	10	10	10	10	10	10	10	10
Si	2.6099	2.6123	3.1818	0	3.0038	2.7577	0.0035	3.1769	3.2927	3.2384	3.124	3.3024	3.2424	3.3582	3.1189	2.733	3.2683	2.6514	2.6226	2.6072	2.6256	3.5389	1.7454	0.0838	0.0516	0.0343	0.0419	2.6164	2.6552	2.6447	2.6449	3.3992	3.2681	3.1787	3.0609	3.1978	2.6321	2.6345	0.0368	2.6625	0.0155	2.6647
Ti	0.1022	0.1101	0	0.2841	0	0	0.4375	0.0001	0	0	0	0.0015	0	0	0.0003	0	0.0042	0.1105	0.0891	0.0947	0.1041	0	0	0.0001	0	0.0071	0	0.0958	0.1145	0.1166	0.1097	0	0	0.0031	0.0013	0	0.101	0.0802	0.2685	0.0768	0.3444	0.0811
Al	1.0043	0.9848	1.8072	0.3775	1.9714	0	0.2353	1.8071	1.6935	1.7548	1.8542	1.6742	1.7443	1.6294	1.8635	1.0336	1.7105	0.9471	0.9866	1.0259	0.9829	1.4689	0	0	0	0	0	1.0276	0.9306	0.9464	0.9605	1.5851	1.7209	1.8049	1.92	1.7909	0.9771	0.9938	0.3435	0.9661	0.3894	0.9594
Cr	0	0.0017	0	0.0001	0.0011	0	0	0	0	0.0001	0.0012	0.0003	0	0	0	0	0.0005	0	0	0.0004	0.0006	0	0	0.0012	0	0.0083	0.0021	0.0018	0	0.0011	0	0.0022	0	0	0	0	0	0.001	0.0078	0.0007	0.0048	0.0013
Fe2	0.8262	0.8365	0.022	8.5471	0.02	4.4846	8.4005	0.0226	0.0186	0.0173	0.0259	0.0201	0.0194	0.0208	0.0223	0.6108	0.0188	0.6992	0.6207	0.6628	0.6677	0.0648	3.3249	0.0556	0.0226	0.0152	0.0215	0.6886	0.7336	0.7157	0.7183	0.0256	0.0175	0.0192	0.022	0.0205	0.6212	0.6663	8.6062	0.7217	8.1046	0.6172
Mn	0.0189	0.0215	0	0.1704	0	0	0.1875	0	0.0013	0.0009	0.0002	0.0002	0	0.0015	0.0017	0.047	0.002	0.0155	0.0064	0.0088	0.0122	0.0035	0	0.0115	0.0098	0.0098	0.0208	0.0146	0.0212	0.0141	0.0167	0.0006	0	0	0.001	0	0.0092	0.0098	0.1254	0.012	0.0914	0.0092
Mg	1.1479	1.1343	0	0.1372	0.003	0	0.165	0.0028	0.0017	0	0.0073	0.0049	0.0014	0.0008	0	2.2376	0	1.2777	1.3945	1.3136	1.3071	0.1389	0	0.0349	0.0215	0.0081	0.0189	1.2524	1.2466	1.2479	1.2427	0.0027	0.0014	0.0023	0.0024	0	1.3736	1.3346	0.1196	1.2927	0.4871	1.387
Ca	0.8425	0.8538	0.5641	0.0105	0.7612	0	0	0.5757	0.4731	0.5092	0.6274	0.4531	0.5163	0.4009	0.6453	0.0723	0.4851	0.8415	0.8495	0.8543	0.8506	0.2018	2.2338	9.7072	9.8326	9.8653	9.8461	0.8557	0.8343	0.8512	0.8395	0.352	0.4838	0.573	0.6893	0.5589	0.8559	0.8574	0.0072	0.8387	0	0.8437
Na	0.3169	0.3066	0.6346	0	0.4788	0	0.0209	0.6292	0.7009	0.6784	0.5839	0.7439	0.6738	0.7582	0.5713	0.0084	0.7115	0.3273	0.3414	0.3322	0.3473	0.549	0.282	0.0294	0.0194	0	0.0115	0.3371	0.3357	0.3275	0.3342	0.8372	0.705	0.6289	0.5373	0.6364	0.2822	0.321	0	0.31	0.0099	0.3062
K	0.1496	0.1521	0.0424	0	0.0201	0	0	0.0381	0.0572	0.0484	0.0324	0.0585	0.0498	0.0723	0.0226	0.0233	0.0539	0.1162	0.1058	0.1017	0.107	0.0697	0.3711	0.0024	0.0013	0.0009	0	0.1033	0.1222	0.1269	0.1312	0.0412	0.0545	0.0404	0.0213	0.0407	0.1304	0.0947	0	0.1011	0.0019	0.1142
Ni	0.0006	0	0.0009	0	0	0	0.0016	0.0005	0.0005	0	0	0.0009	0	0.0004	0	0	0	0	0.0019	0.0005	0.0006	0.0005	0.6239	0.0054	0	0.006	0	0	0	0	0	0.0005	0	0	0.0016	0	0.0018	0.0024	0.0041	0.0003	0	0
Total	7.0189	7.0137	6.2531	9.5271	6.2594	7.2423	9.4518	6.2531	6.2396	6.2476	6.2565	6.2601	6.2473	6.2424	6.246	6.7661	6.2548	6.9863	7.0186	7.002	7.0056	6.036	8.5812	9.9314	9.9588	9.9549	9.9628	6.9933	6.994	6.9921	6.9978	6.2463	6.2512	6.2504	6.2571	6.2453	6.9846	6.9957	9.519	6.9828	9.449	6.984
X	61.048	60.946	60.826	60.635	60.39	58.941	59.67	51.705	51.905	52.068	52.108	52.201	52.359	52.515	52.646	52.17	52.168	52.596	52.655	52.649	52.669	52.753	52.784	52.621	53.054	49.44	49.553	50.158	53.394	53.393	53.342	53.938	32.927	33.06	33.398	32.976	16.377	16.668	16.518	15.211	14.239	17.086
Y	72.877	73.055	72.808	72.522	72.184	72.4	72.969	61.664	61.658	61.329	61.342	61.28	61.267	61.265	61.266	61.478	61.356	63.069	63.144	63.207	63.418	63.333	63.421	63.472	63.32	62.479	62.681	62.57	74.994	75.058	75.297	75.339	79.681	79.913	79.913	79.931	72.945	72.592	72.629	75.581	75.213	74.743
CH1	CH2	CH3		Counting time
				Peak	-ve bg	+bg
Na	K	Fe		2 x 10	2 x 5	2 x 5
Mg	Ca	Mn		2 x 10	2 x 5	2 x 5
Al	Ti	Ni		2 x 10	2 x 5	2 x 5
Si		Cr		2 x 10	2 x 5	2 x 5
				2 x 10	2 x 5	2 x 5
